# Supplementary material for: The photo-isomerization of the cyclononatetraenyl ligand and related rare earth complexes
Source: Royal Society of Chemistry journal article supplement (doi:10.1039/d4sc04767b), 2024-01-01
Supplement: d4sc04767b2.pdf [file d4sc04767b2.pdf]

Supporting information for the manuscript

## Photo-isomerization of the cyclononatetraenyl ligand and related rare earth complexes

Lucie Pedussaut,<sup>a‡</sup> Nolwenn Mahieu,<sup>a‡</sup> Camille Chartier,<sup>a</sup> Thayalan Rajeshkumar,<sup>b</sup> Maxime Tricoire,<sup>a</sup> Iskander Douair,<sup>b</sup> Nicolas Casaretto,<sup>a</sup> Laurent Maron,<sup>b</sup> Grégory Danoun <sup>\*a</sup> and Grégory Nocton<sup>\*a</sup>

- a. LCM, CNRS, Ecole polytechnique, Institut polytechnique de Paris, Route de Saclay, 91120 Palaiseau, France.
- b. LPCNO, UMR 5215, Université de Toulouse-CNRS, INSA, UPS, Toulouse, France.
- ‡ Both authors contributed equally to the work

### Summary

|                                          |     |
|------------------------------------------|-----|
| 1. General information .....             | 2   |
| 2. Experimental section .....            | 3   |
| 3. <sup>1</sup> H NMR Spectroscopy ..... | 7   |
| 4. X-ray crystallography .....           | 19  |
| 5. UV-visible Spectroscopy.....          | 49  |
| 6. Isomerization study .....             | 54  |
| a) UV and NMR study.....                 | 55  |
| b) Photostationary (PSS) study.....      | 58  |
| 7. Computational details.....            | 69  |
| 8. References .....                      | 140 |

## 1. General information

All air- and moisture-sensitive reactions were performed using standard Schlenk-line techniques under dry N<sub>2</sub> or Ar atmosphere or in argon-filled gloveboxes (MBraun). All glassware was dried at 140 °C for at least 12 h prior to use. All solvents (Et<sub>2</sub>O, toluene, benzene, pentane, C<sub>6</sub>D<sub>6</sub>, tol-d<sub>8</sub>, THF-d<sub>8</sub>) were dried over sodium, degassed, and transferred under reduced pressure in a cold flask. Acetonitrile and deuterated acetonitrile were dried over CaH<sub>2</sub>, degassed, and transferred under reduced pressure in a cold flask. K<sub>2</sub>Cot, KCnt was prepared according to literature procedures. All LnCotI(thf)<sub>n</sub> were synthesized according to a modified procedure published literature by using the corresponding LnI<sub>3</sub> except for Ln = Sm where another synthesis pathway was used.<sup>1-4</sup> For Ln = Lu, [(Cot)Lu(BH<sub>4</sub>)(thf)]<sub>2</sub> was synthesized according to known procedure.<sup>1</sup> Ln(Cot)(*cis*-Cnt) were prepared according to known procedure Ln = Tb-Tm.<sup>1</sup> All other chemicals were obtained from commercial sources and used without further purification. <sup>1</sup>H NMR spectra were recorded in 5 mm tubes adapted with a J. Young valve on a Bruker Avance III-300 MHz spectrometer and chemical shifts are expressed relative to internal solvent references in ppm. UV-visible absorption spectra were recorded on a Cary60 spectrometer in quartz cuvettes adapted with a J. Young valve. Irradiation were performed using Kessils lamps and Prizmatix multi-Wavelength FC5-LED. Elemental analyses were obtained from Mikroanalytisches Labor Pascher (Remagen, Germany). IR spectra were recorded using Thermo Scientific Nicolet iS5 spectrometer equipped with the ATR iD7 accessory.

## 2. Experimental section

### a. General procedures:

#### General procedure A: Synthesis of 2-Ln-*cis*

A mixture of LnCotl(thf)<sub>n</sub> (n = 2, 3) (1.05 equiv.) and KCnt (1 equiv.) in toluene and acetonitrile (10:1) was allowed to stir at room temperature. After 12 h, the vessel was protected from light and the solvent were removed under reduced pressure. The reaction mixture was then dissolved in toluene. The evaporation / dissolution in toluene step was repeated once. The colored supernatant was then filtered and concentrated to yield 2-Ln-*cis*. The desired compound can be obtained as microcrystalline powder through toluene extraction and evaporation. XRD suitable crystals were obtained by concentration of the toluene solution at -40°C.

#### General procedure B: Synthesis of 2-Ln-*trans*

All steps are protected from light. A mixture of LnCotl(thf)<sub>n</sub> (n = 2, 3) (1 equiv.) and KCnt (1 equiv.) in toluene was protected from light with aluminum foil and allowed to stir. After 12 h, the supernatant was filtered, concentrated, and cooled to yield a mixture of isomers with a high ratio of 2-Ln-*trans*. The desired compound can be obtained as microcrystalline powder through toluene extraction and slow evaporation of dryness. XRD suitable crystals were obtained by concentration of the toluene solution at -40°C.

### b. Synthesis of 2-Ln-*cis*:

**2-Y-*cis***: Synthesized according to general procedure A YCotl(thf)<sub>3</sub> (106 mg, 0.20 mmol, 1.0 equiv) and KCnt (31 mg, 0.20 mmol, 1.05 equiv) as yellow micro-crystalline powder (24.9 mg, 40%)

<sup>1</sup>H NMR (300 MHz, toluene-d<sub>8</sub>, 293 K): δ (ppm) 6.77 (s, 9H, Cnt), 5.93 (s, 8H, Cot)

Anal. Calcd. for C<sub>17</sub>H<sub>17</sub>Y (310.23): C, 65.82; H, 5.52 Found: C, 63.65; H, 5.42.

**2-La-*cis***: Synthesized according to general procedure A LaCotl(thf)<sub>3</sub> (61.1 mg, 0.10 mmol, 1.0 equiv) and KCnt (17.2 mg, 0.11 mmol, 1.05 equiv) as orange micro-crystalline powder (26.9 mg, 71%)

<sup>1</sup>H NMR (300 MHz, CD<sub>2</sub>Cl<sub>2</sub>, 293 K): δ (ppm) 7.53 (s, 9H, Cnt), 6.03 (s, 8H, Cot)

Anal. Calcd. for C<sub>17</sub>H<sub>17</sub>La (360.04): C, 56.68; H, 4.76 Found: C, 56.75; H, 4.81

**2-Ce-*cis***: Synthesized according to general procedure A CeCotl(thf)<sub>3</sub> (150 mg, 0.25 mmol, 1.0 equiv) and KCnt (42 mg, 0.26 mmol, 1.05 equiv) as green micro-crystalline powder (53 mg, 58%)

<sup>1</sup>H NMR (300 MHz, toluene-d<sub>8</sub>, 293 K): δ (ppm) 6.22 (s, 9H, Cnt), 4.56 (s, 8H, Cot)

Anal. Calcd. for C<sub>17</sub>H<sub>17</sub>Ce (361.43): C, 56.49; H, 4.74 Found: C, 56.36; H, 4.79.

**2-Pr-*cis***: Synthesized according to general procedure A PrCotl(thf)<sub>3</sub> (70.9 mg, 0.12 mmol, 1.0 equiv) and KCnt (19.9 mg, 0.13 mmol, 1.05 equiv) as light brown micro-crystalline powder (25.6 mg, 59%)

<sup>1</sup>H NMR (300 MHz, toluene-d<sub>8</sub>, 293 K): δ (ppm) -0.60 (s, 9H, Cnt), -12.07 (s, 8H, Cot)

Anal. Calcd. for C<sub>17</sub>H<sub>17</sub>Pr (362.23): C, 56.37; H, 4.73 Found: C, 55.80; H, 4.74.

**2-Nd-*cis***: Synthesized according to general procedure A NdCotl(thf)<sub>3</sub> (72.1 mg, 0.12 mmol, 1.0 equiv) and KCnt (20.4 mg, 0.13 mmol, 1.05 equiv) as greenish micro-crystalline powder (24.0 mg, 54 %)

<sup>1</sup>H NMR (300 MHz, toluene-d<sub>8</sub>, 293 K): δ (ppm), 0.27 (s, 9H, Cnt), -13.70 (br s, 8H, Cot)

Anal. Calcd. for C<sub>17</sub>H<sub>17</sub>Nd (363.04): C, 55.86; H, 4.69 Found: C, 55.53; H, 4.68

**2-Sm-cis:** Synthesized according to general procedure **A** SmCotI(thf)<sub>3</sub> (100 mg, 0.17 mmol, 1 equiv.) and KCnt (25 mg, 0.18 mmol, 1 equiv.) as small green micro-crystalline powder (24 mg, 38 %) <sup>1</sup>H NMR (300 MHz, toluene-d<sub>8</sub>, 293 K): δ (ppm) 16.47 (br s, 8H, Cot), 11.39 (s, 9H, Cnt)  
Anal. Calcd. for C<sub>17</sub>H<sub>17</sub>Sm (371.68): C, 54.89; H, 4.57; Found: C, 53.45; H, 4.56.

**2-Gd-cis:** Synthesized according to general procedure **A** GdCotI(thf)<sub>3</sub> (79.9 mg, 0.15 mmol, 1.0 equiv) and KCnt (24.8 mg, 0.16 mmol, 1.05 equiv) as small orange needles (22 mg, 36 %) <sup>1</sup>H NMR (300 MHz, toluene-d<sub>8</sub>, 293 K): δ (ppm), 97.94 (br s), 23.50 (br s)  
Anal. Calcd. for C<sub>17</sub>H<sub>17</sub>Gd (379.06): C, 53.94; H, 4.53 Found: C, 49.18; H, 4.30.

**2-Y-trans:** Synthesized according to general procedure **B** YCotI(thf)<sub>3</sub> (29.1 mg, 0.0627 mmol, 1.00 equiv.) and KCnt (10.4 mg, 0.0661 mmol, 1.05 equiv.) as bright orange-red crystals (3.0 mg, 15%, 61% *trans*).  
<sup>1</sup>H NMR (300 MHz, toluene-d<sub>8</sub>, 293 K): 6.77 (s, Cnt<sup>cis</sup>), 6.55 (s br, Cnt<sup>trans</sup>), 6.02 (s, Cot<sup>trans</sup>), 5.94 (s, Cot<sup>cis</sup>), -3.19 (t, Cnt<sup>trans</sup>)  
Anal. Calcd. for C<sub>17</sub>H<sub>17</sub>Y (310.23): C, 65.82; H, 5.52 Found: C, 53.32; H, 4.95.

**2-La-trans:** Synthesized according to general procedure **B** LaCotI(thf)<sub>3</sub> (64.7 mg, 0.11 mmol, 1.00 equiv) and KCnt (18.7 mg, 0.12 mmol, 1.09 equiv) as small orange crystalline needles (4.0 mg, 10%, 55% *trans*)  
<sup>1</sup>H NMR (300 MHz, CD<sub>2</sub>Cl<sub>2</sub>, 293 K): δ (ppm) 7.52 (s, Cnt<sup>cis</sup>), 7.50(s, 2H, Cnt<sup>trans</sup>), 6.96 (m, 2H, Cnt<sup>trans</sup>), 6.83(m, 4H, Cnt<sup>trans</sup>), 6.12 (s, 8H, Cot-*trans*), 6.02(s, Cot-*cis*), -3.92 (t, 1H, Cnt<sup>trans</sup>, J = 12 Hz)  
Anal. Calcd. for C<sub>17</sub>H<sub>17</sub>La (360.04): C, 56.68; H, 4.76 Found: C, 55.80; H, 4.71.

**2-Ce-trans:** Synthesized according to general procedure **B** CeCotI(thf)<sub>3</sub> (58.2 mg, 0.099 mmol, 1 equiv) and KCnt (15.8 mg, 0.10 mmol, 1.01 equiv) as small green crystalline needles (4.3 mg, 12%, 79 % *trans*)  
<sup>1</sup>H NMR (300 MHz, CD<sub>2</sub>Cl<sub>2</sub>, 293 K): δ (ppm) 25.68 (s, 2H, Cnt<sup>trans</sup>), 15.55 (s, 2H, Cnt<sup>trans</sup>), 6.75 (br s, Cnt<sup>cis</sup>), 4.46 (br s, Cot<sup>cis</sup>), 3.36 (s, 8H, Cot<sup>trans</sup>), -16.23 (s, 2H, Cnt<sup>trans</sup>), -50.30 (s, 1H, Cnt<sup>trans</sup>)  
Anal. Calcd. for C<sub>17</sub>H<sub>17</sub>Ce (361.43): C, 56.49; H, 4.74 Found: C, 55.28; H, 4.66.

**2-Pr-trans:** Synthesized according to general procedure **B** PrCotI(thf)<sub>3</sub> (65.5 mg, 0.11 mmol, 1 equiv) and KCnt (18.9 mg, 0.12 mmol, 1.09 equiv) as small orange crystalline needles (5.6 mg, 14%)  
<sup>1</sup>H NMR (300 MHz, CD<sub>2</sub>Cl<sub>2</sub>, 293 K): δ (ppm) 84.96 (s br, 1H, Cnt<sup>trans</sup>), 7.67 (s, 2H, Cnt<sup>trans</sup>), -0.21- -0.49 (m br, 4H, Cnt<sup>trans/cis</sup>), -1.96 (s, 2H, Cnt<sup>trans</sup>), -11.65 (s, 12H, Cot<sup>trans/cis</sup>), -23.00 (s, 2H, Cnt<sup>trans</sup>)  
Anal. Calcd. for C<sub>17</sub>H<sub>17</sub>Pr (362.23): C, 56.37; H, 4.73 Found: C, 55.80; H, 4.74.

**2-Nd-trans:** Synthesized according to general procedure **B** NdCotI(thf)<sub>3</sub> (62.2 mg, 0.105 mmol, 1 equiv) and KCnt (17.2 mg, 0.109 mmol, 1.04 equiv) as small orange crystalline needles (5.3 mg, 14%)  
<sup>1</sup>H NMR (300 MHz, CD<sub>2</sub>Cl<sub>2</sub>, 293 K): δ (ppm) 21.16 (s, 2H, Cnt<sup>trans</sup>), 7.19 (s, 2H, Cnt<sup>trans</sup>), 6.68 (s, 2H, Cnt<sup>trans</sup>), -13.84 (s, 8H, Cot<sup>trans</sup>), -26.83 (s, 2H, Cnt<sup>trans</sup>).  
Anal. Calcd. for C<sub>17</sub>H<sub>17</sub>Nd (363.04): C, 55.86; H, 4.69 Found: C, 55.80; H, 4.63

**2-Sm-trans:** Synthesized according to general procedure **B** SmCotI(thf)<sub>3</sub> (52 mg, 0.1 mmol, 1 equiv) and KCnt (15 mg, 0.1 mmol, 1 equiv) as small green crystalline needles (5.2 mg, 15% yield, 89% *trans*).



$^1\text{H}$  NMR (300 MHz, toluene- $d_8$ , 293 K):  $\delta$  (ppm) 16.45 (br, Cot<sup>cis</sup>), 15.60 (s, 8H, Cot<sup>trans</sup>), 15.02 (s, 2H, Cnt<sup>trans</sup>), 14.59 (s, 2H Cnt<sup>trans</sup>), 11.41 (s, Cnt<sup>cis</sup>), 11.00 (s, 2H, Cnt<sup>trans</sup>), 6.19 (s, 2H, Cnt<sup>trans</sup>), -40.52 (s, 1H, Cnt<sup>trans</sup>)

Anal. Calcd. for  $\text{C}_{17}\text{H}_{17}\text{Sm}$  (371.68): C, 54.89; H, 4.57; Found: C, 54.37; H, 4.55.

**2-Gd-trans:** Synthesized according to general procedure **B** GdCotI(thf)<sub>2</sub> (63.1 mg, 0.118 mmol, 1 equiv) and KCnt (19.1 mg, 0.121 mmol, 1.03 equiv) as small orange crystalline needles (6.5 mg, 17%)

$^1\text{H}$  NMR (300 MHz,  $\text{CD}_2\text{Cl}_2$ , 293 K):  $\delta$  (ppm) 34.84-23.62 (br), 23.62 (br), 12.18 (br)

Anal. Calcd. for  $\text{C}_{17}\text{H}_{17}\text{Gd}$  (379.06): C, 53.94; H, 4.53 Found: C, 52.14; H, 4.45.

**2-Tb-trans:** Synthesized according to general procedure **B** TbCotI(thf)<sub>2</sub> (42.2 mg, 0.079 mmol, 1.00 equiv) and KCnt (13.0 mg, 0.083 mmol, 1.05 equiv) as small orange crystalline needles (8.0 mg, 27% yield, 87% trans)

$^1\text{H}$  NMR (300 MHz, toluene- $d_8$ , 293 K):  $\delta$  (ppm) 391.13 (s, 2H, Cnt<sup>trans</sup>), 242.25 (s, Cot<sup>cis</sup>), 225.40 (s, 8H, Cot<sup>trans</sup>), 196.81 (s, 2H, Cnt<sup>trans</sup>), 163.00 (s, 2H, Cnt<sup>trans</sup>), 100.49 (s, Cnt<sup>cis</sup>), -156.76 (s, 2H, Cnt<sup>trans</sup>)

Anal. Calcd. for  $\text{C}_{17}\text{H}_{17}\text{Tb}$  (380.06): C, 53.70; H, 4.51 Found: C, 53.73; H, 4.54.

**2-Dy-trans:** Synthesized according to general procedure **B** DyCotI(thf)<sub>2</sub> (67.7 mg, 0.126 mmol, 1.00 equiv.) and KCnt (21.1 mg, 0.134 mmol, 1.06 equiv.) as small orange crystalline needles (4.5 mg, 9 %, 75% trans)

$^1\text{H}$  NMR (300 MHz,  $\text{CD}_2\text{Cl}_2$ , 293 K):  $\delta$  (ppm), 158.33 (br s, 2H, Cnt<sup>trans</sup>), 115.04 (br s, Cnt<sup>cis</sup>), 99.55 (br s, 2H, Cnt<sup>trans</sup>), 72.10 (br s, Cot<sup>trans/cis</sup>), 44.47 (br s, 2H, Cnt<sup>trans</sup>), -168.91 (br s, 2H, Cnt<sup>trans</sup>)

Anal. Calcd. for  $\text{C}_{17}\text{H}_{17}\text{Dy}$  (383.82): C, 53.20; H, 4.46 Found: C, 52.76; H, 4.47.

**2-Ho-trans:** Synthesized according to general procedure **B** HoCotI(thf)<sub>2</sub> (54.8 mg, 0.101 mmol, 1.00 equiv.) and KCnt (16.6 mg, 0.106 mmol, 1.05 equiv.) as small orange crystalline needles (5.7 mg, 15 %)

$^1\text{H}$  NMR (300 MHz,  $\text{CD}_2\text{Cl}_2$ , 293 K):  $\delta$  (ppm), 198.17 (br s, Cnt<sup>trans</sup>), 101.99 (br s, Cnt<sup>trans</sup>), 87.22 (br s, Cnt<sup>cis</sup>), 66.81 (br s, Cot<sup>trans</sup>), 57.81 (br s, Cot<sup>cis</sup>), 18.98 (br s, Cnt<sup>trans</sup>), -124.84 (br s, Cnt<sup>trans</sup>)

Anal. Calcd. for  $\text{C}_{17}\text{H}_{17}\text{Ho}$  (386.06): C, 52.86; H, 4.44 Found: C, 47.75; H, 4.20

**2-Er:** Synthesized according to general procedure **B** ErCotI(thf)<sub>2</sub> (59.4 mg, 0.109 mmol, 1.00 equiv.) and KCnt (18.6 mg, 0.118 mmol, 1.08 equiv.) as bright orange crystals (4.4 mg, 10%) where only the *cis* product could be obtained.

$^1\text{H}$  NMR (300 MHz, toluene- $d_8$ , 293 K):  $\delta$  (ppm), -3.94 (br s), -127.52 (br s)

Anal. Calcd. for  $\text{C}_{17}\text{H}_{17}\text{Er}$  (388.58): C, 52.55; H, 4.41 Found: C, 51.37; H, 4.35

**2-Tm:** Synthesized according to general procedure **B** TmCotI(thf)<sub>2</sub> (57.4 mg, 0.105 mmol, 1.00 equiv.) and KCnt (17.4 mg, 0.111 mmol, 1.05 equiv.) as bright orange crystals (3.8 mg, 9%) where only the *cis* product could be obtained.

$^1\text{H}$  NMR (300 MHz, toluene- $d_8$ , 293 K):  $\delta$  (ppm), -22.87 (br s), -227.25 (br s)

Anal. Calcd. for  $\text{C}_{17}\text{H}_{17}\text{Tm}$  (390.07): C, 52.32; H, 4.39 Found: C, 45.77; H, 4.13.

**2-Lu:** Synthesized according to general procedure **B** [LuCot(thf)(BH<sub>4</sub>)<sub>2</sub>] (146 mg, 0.33 mmol, 1.00 equiv.) and KCnt (52 mg, 0.33 mmol, 1.0 equiv.) as yellow needles (26 mg, 9%) where only the *cis* product could be obtained.

$^1\text{H}$  NMR (300 MHz, toluene- $d_8$ , 293 K):  $\delta$  (ppm), 6.58 (s, 9H, Cnt<sup>cis</sup>), 5.88 (s, 8H, Cot<sup>cis</sup>)  
Anal. Calcd. for  $\text{C}_{17}\text{H}_{17}\text{Lu}$  (396.29): C, 51.52; H, 4.32 Found: C, 51.14; H, 4.96

**c. Synthesis of 1-trans**

All steps are protected from light. A mixture of  $\text{SmI}_2$  (49.1 mg, 12mmol, 1 equiv.) and KCnt (21 mg, 13 mmol, 1.1 equiv.) in toluene was protected from light with aluminum foil and allowed to stir. After 12 h, the supernatant was filtered, and cooled at  $-40\text{ }^\circ\text{C}$  to yield small black blocks (5.2 mg, 11%, 100% *trans,trans*). No crystals suitable for XRD could be obtained without a considerable isomerization of the compound from **1-trans** to **1-cis**.

$^1\text{H}$  NMR (300 MHz, toluene- $d_8$ , 293 K):  $\delta$  (ppm) 51.27 – 49.57 (s, 4H), 26.34 (s, 4H), 21.10 (s, 4H), 15.34 (s, 4H), -0.95 (s, 2H).

Anal. Calcd. for  $\text{C}_{18}\text{H}_{18}\text{Sm}$  (384.70): C, 56.2; H, 4.72 Found: C, 52.83; H, 4.57.

3.  $^1\text{H}$  NMR Spectroscopy  
 a. The KCnt ligand

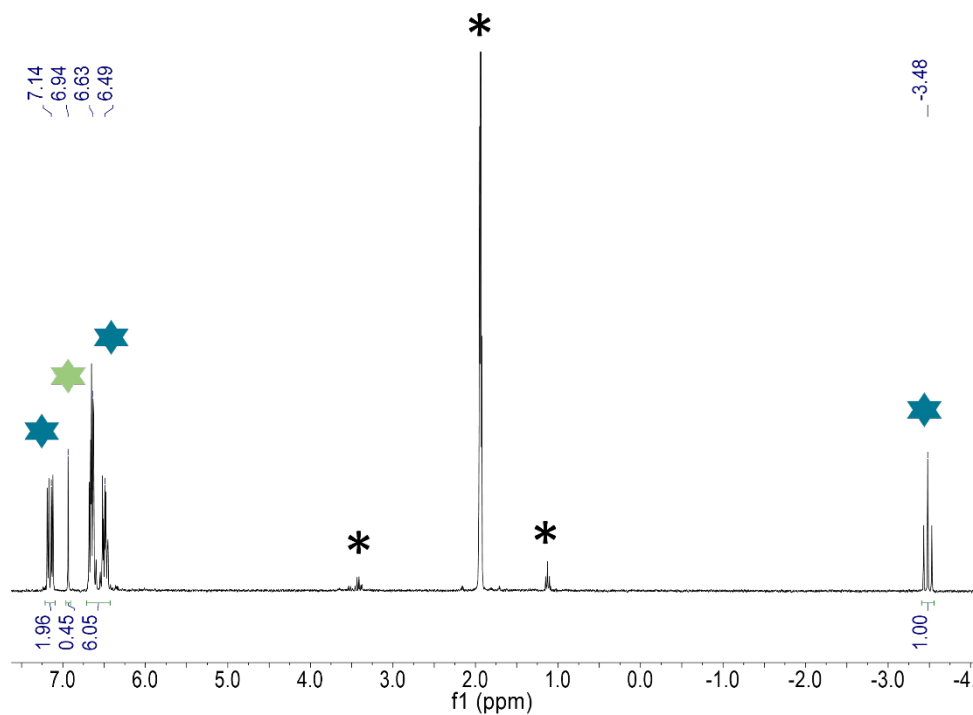

Figure S1:  $^1\text{H}$  NMR of KCnt-*trans* in  $\text{CD}_3\text{CN}$  measured at 293 K (\* residual protio signal of the solvent). Green star: signal attributed to KCnt-*cis*. Blue star: signal attributed to KCnt-*trans*

b. Complexes 1

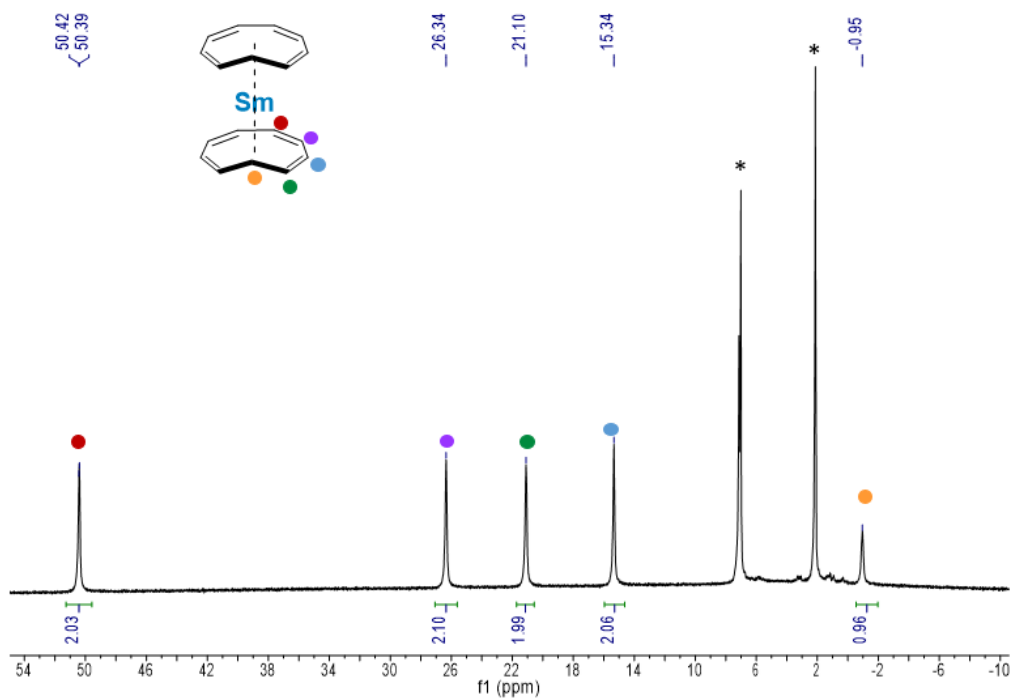

Figure S2:  $^1\text{H}$  NMR of **1-trans** in  $\text{toluene-}d_8$  measured at 293 K (\* residual protio signal of the solvent).

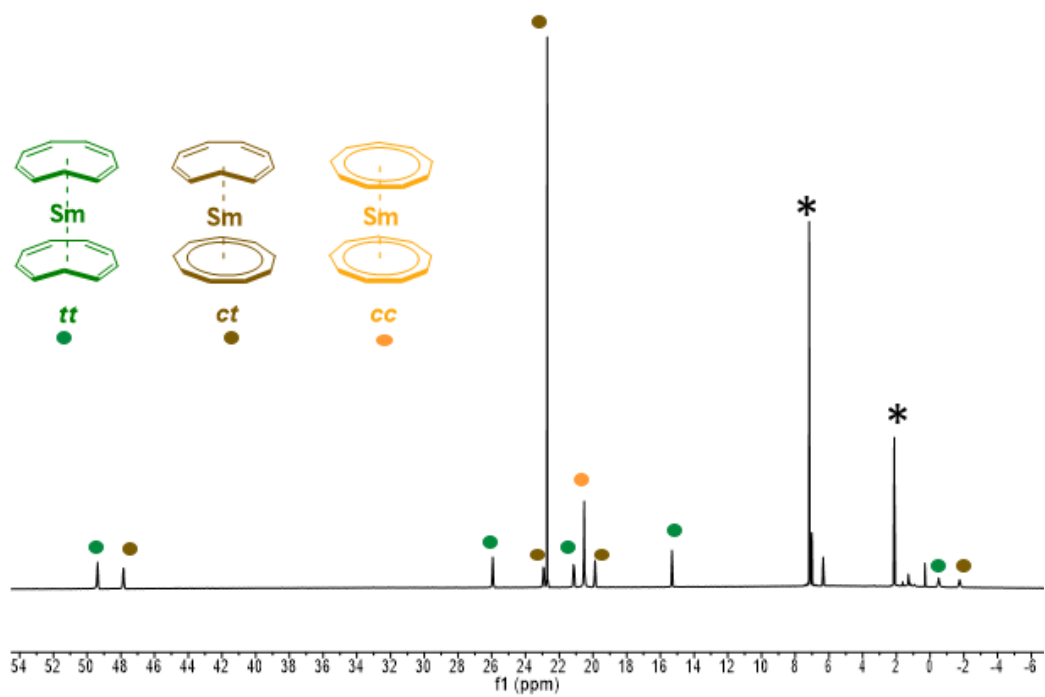

**Figure S3:**  $^1\text{H}$  NMR of **1** after crystallization in toluene- $d_8$  measured at 293 K (49 % of **1-trans**; 40 % **1-cis-trans**; 11 % of **1-cis** (\* residual protio signal of the solvent)).

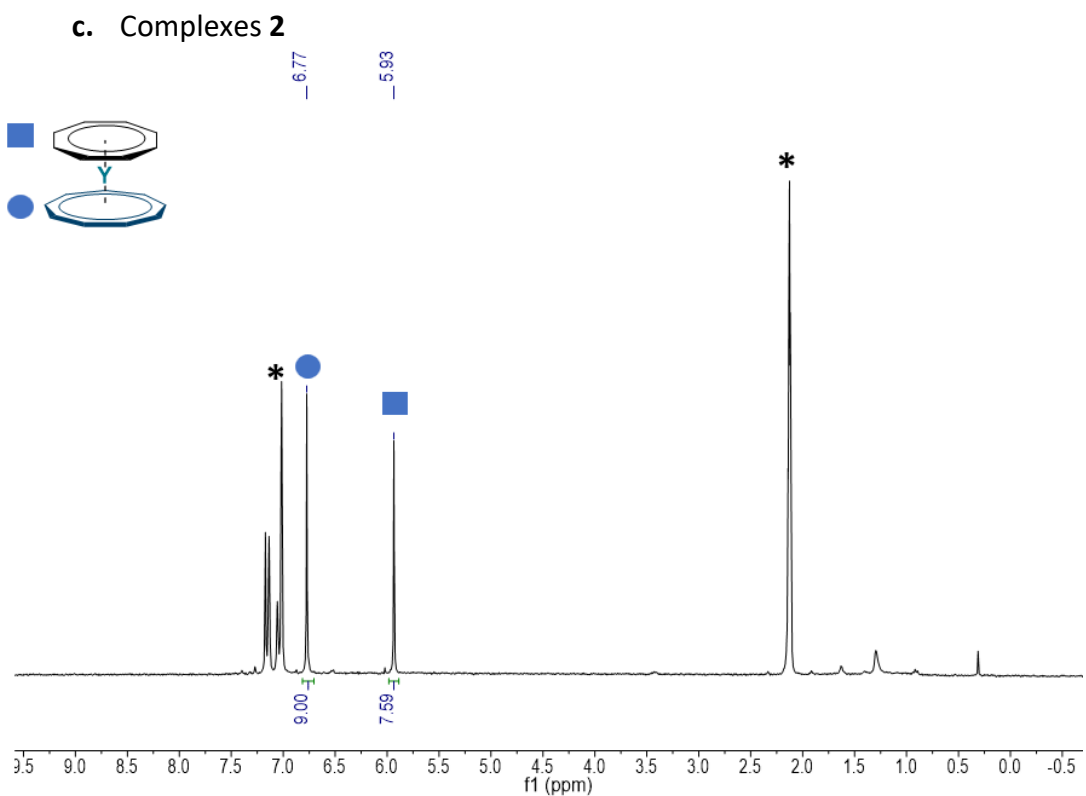

**Figure S4:**  $^1\text{H}$  NMR **2-Y-cis** in toluene- $d_8$  measured at 293 K (\* residual protio signal of the solvent)

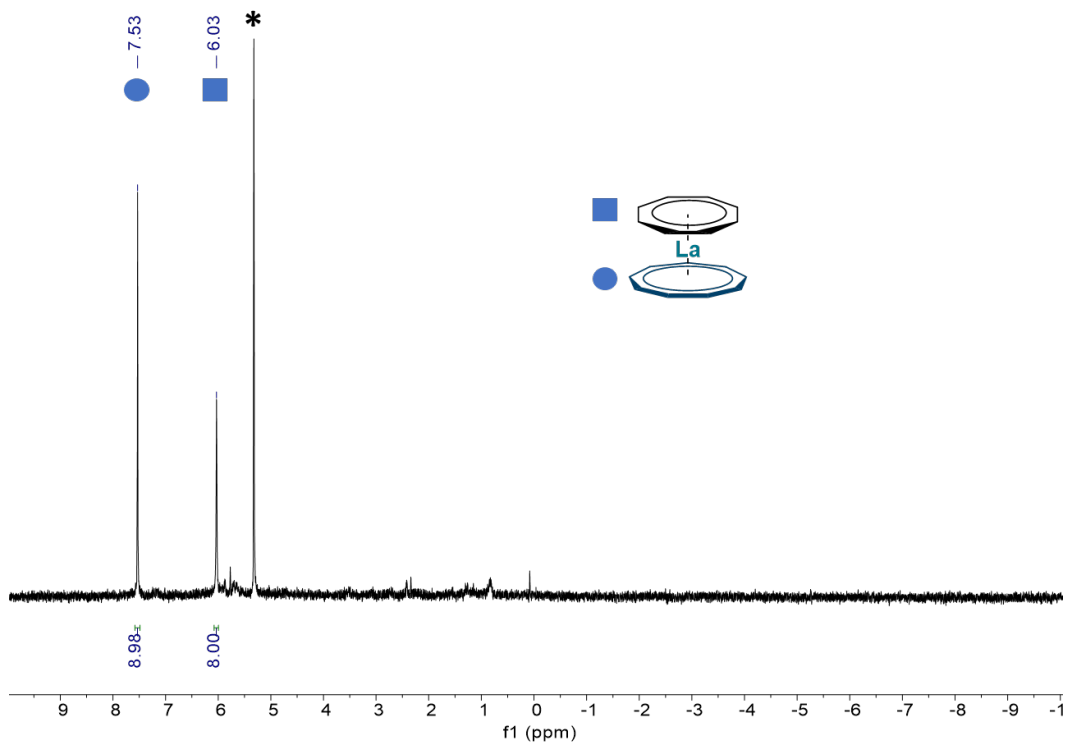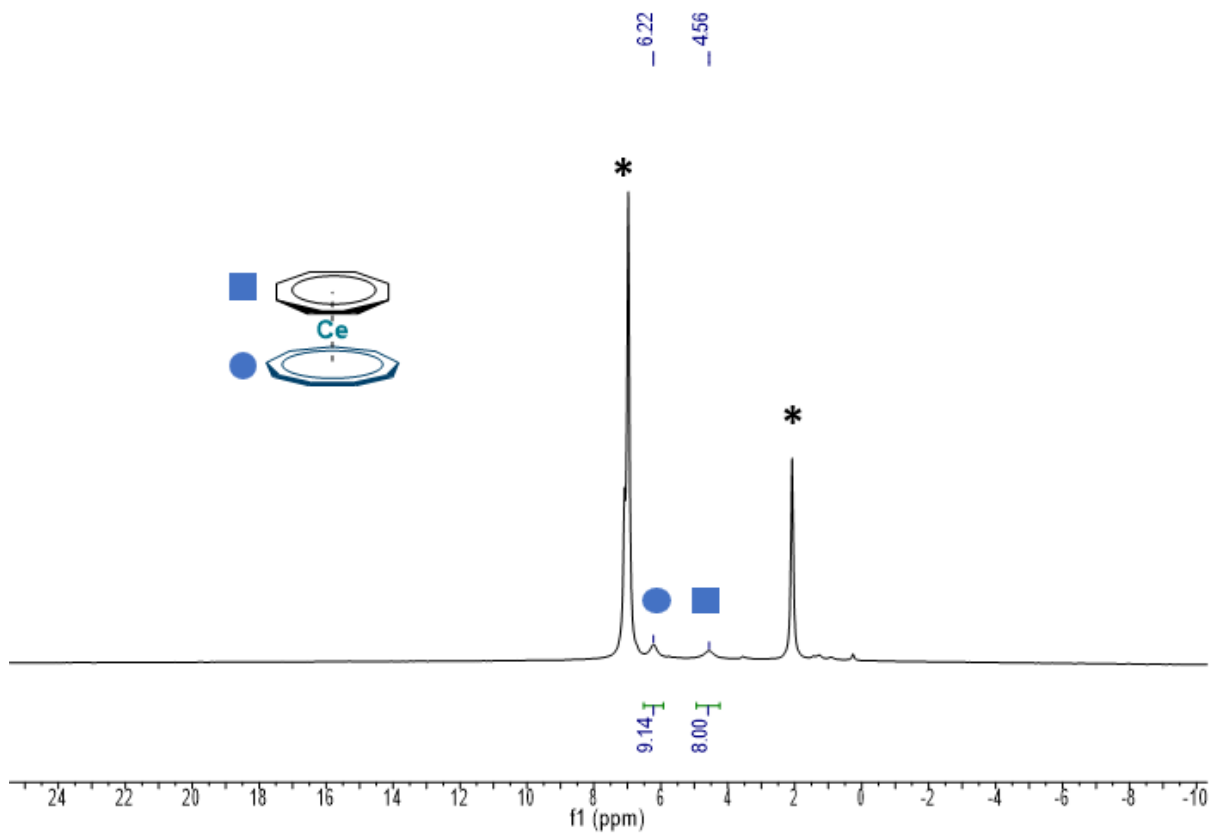

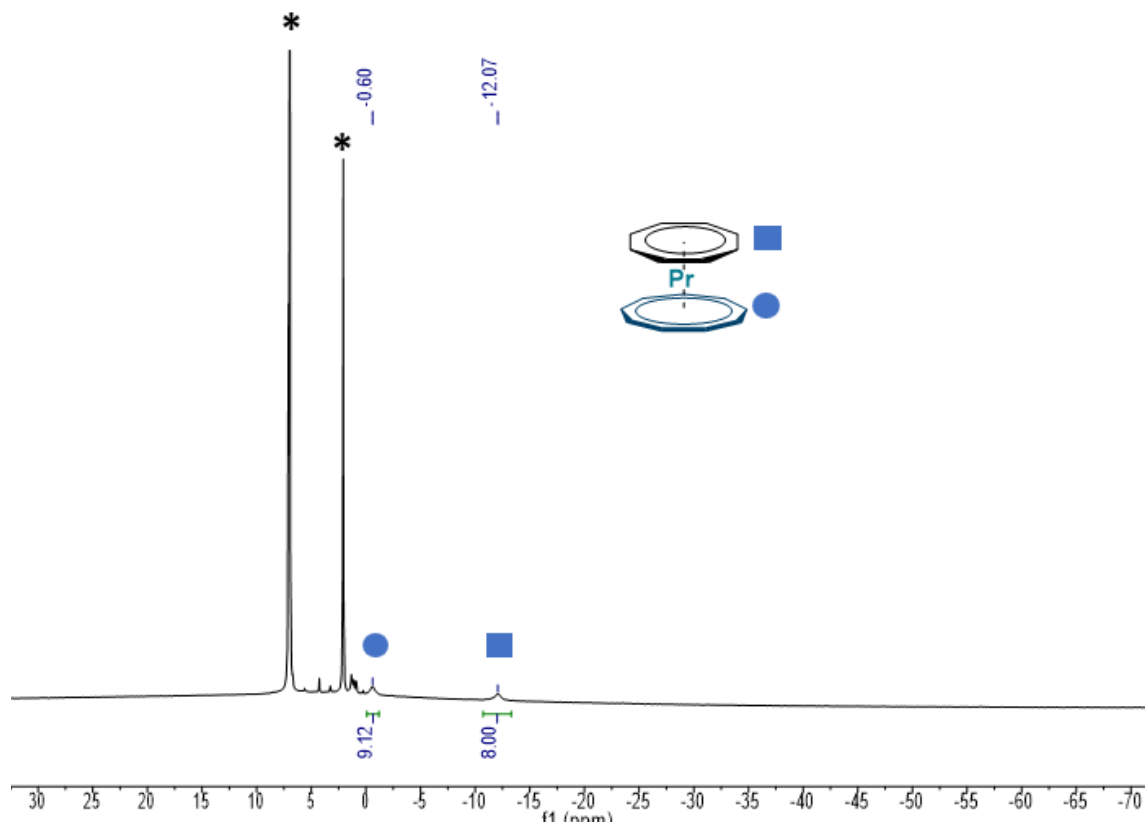

Figure S7:  $^1\text{H}$  NMR of 2-Pr-cis in toluene- $d_8$  measured at 293 K (\* residual protio signal of the solvent)

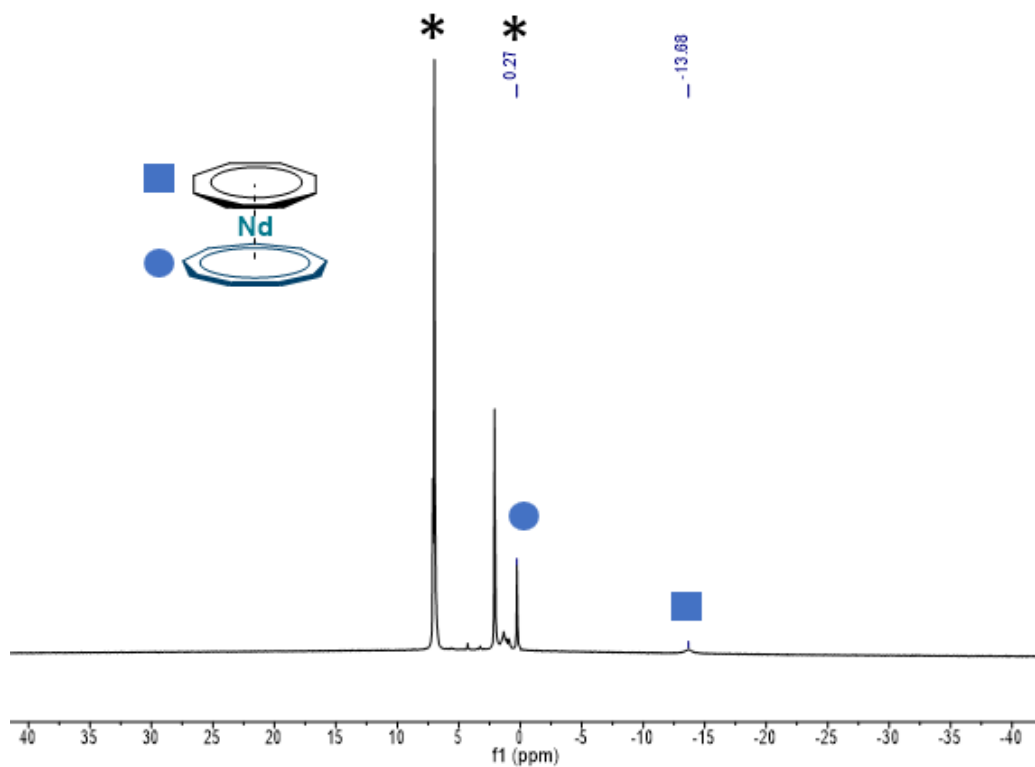

Figure S8:  $^1\text{H}$  NMR of 2-Nd-cis in toluene- $d_8$  measured at 293 K (\* residual protio signal of the solvent). The uncertainty of integration does not allow for specific attribution.

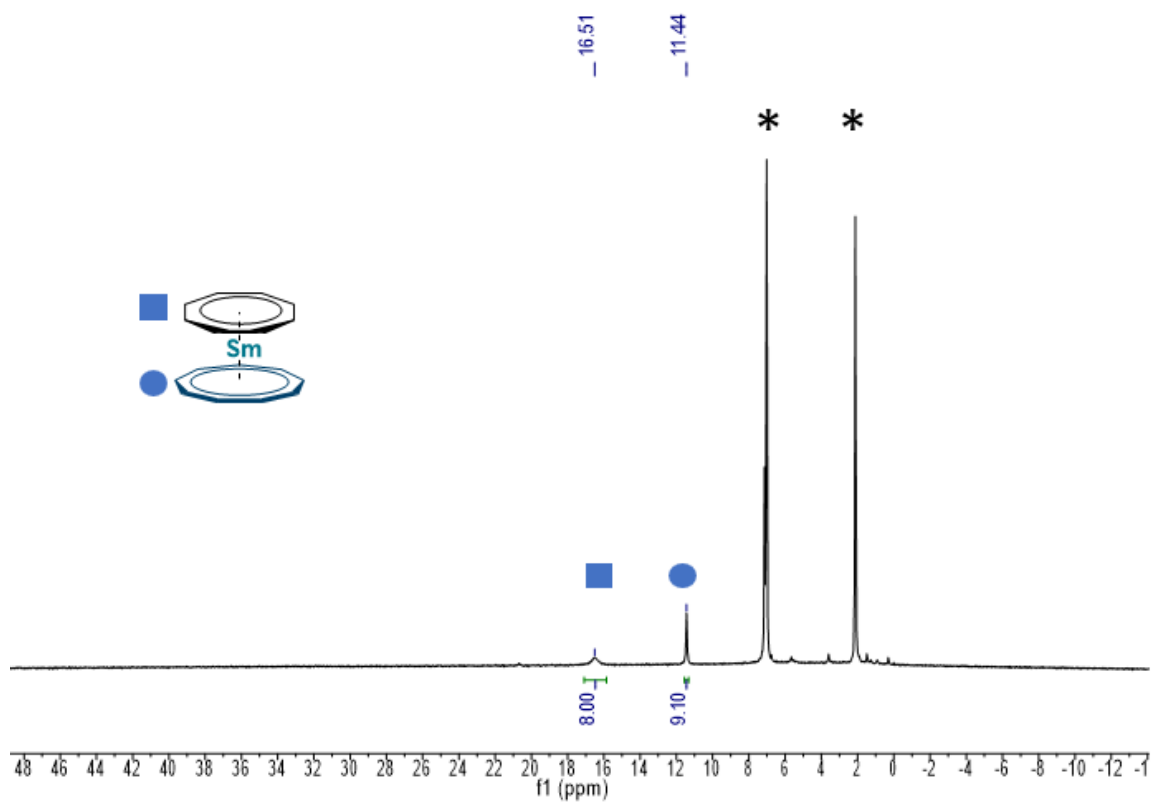

**Figure S9:**  $^1\text{H}$  NMR of **2-Sm-cis** in  $\text{toluene-d}_8$  measured at 293 K (\* residual protio signal of the solvent).

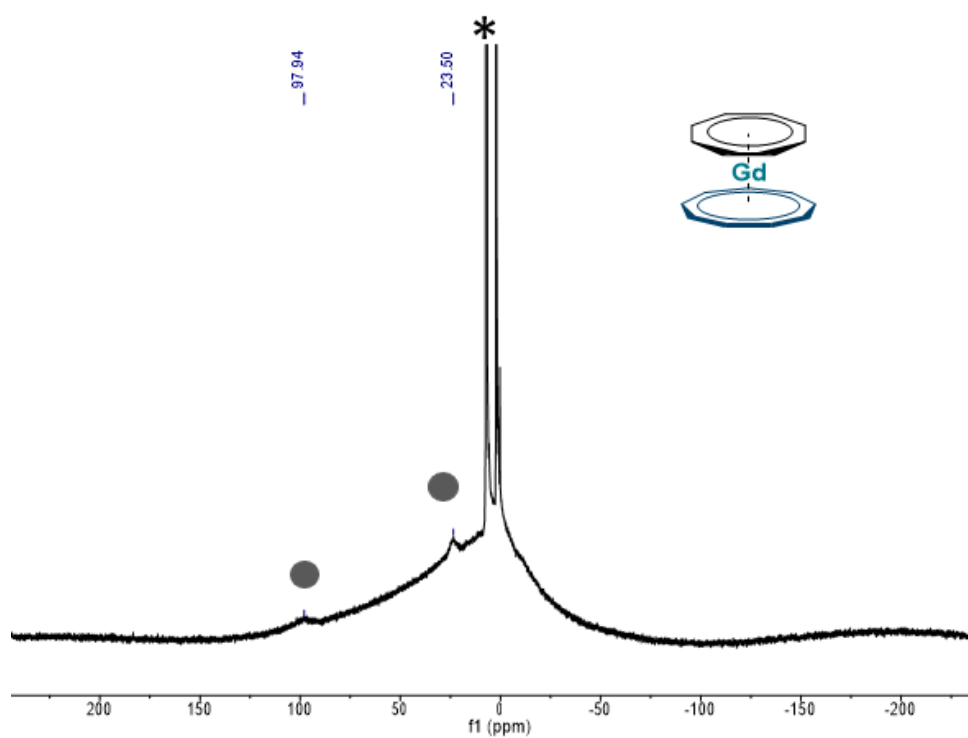

**Figure S10:**  $^1\text{H}$  NMR of **2-Gd-cis** in  $\text{toluene-d}_8$  measured at 293 K (\* residual protio signal of the solvent). The uncertainty of integration does not allow the attribution.

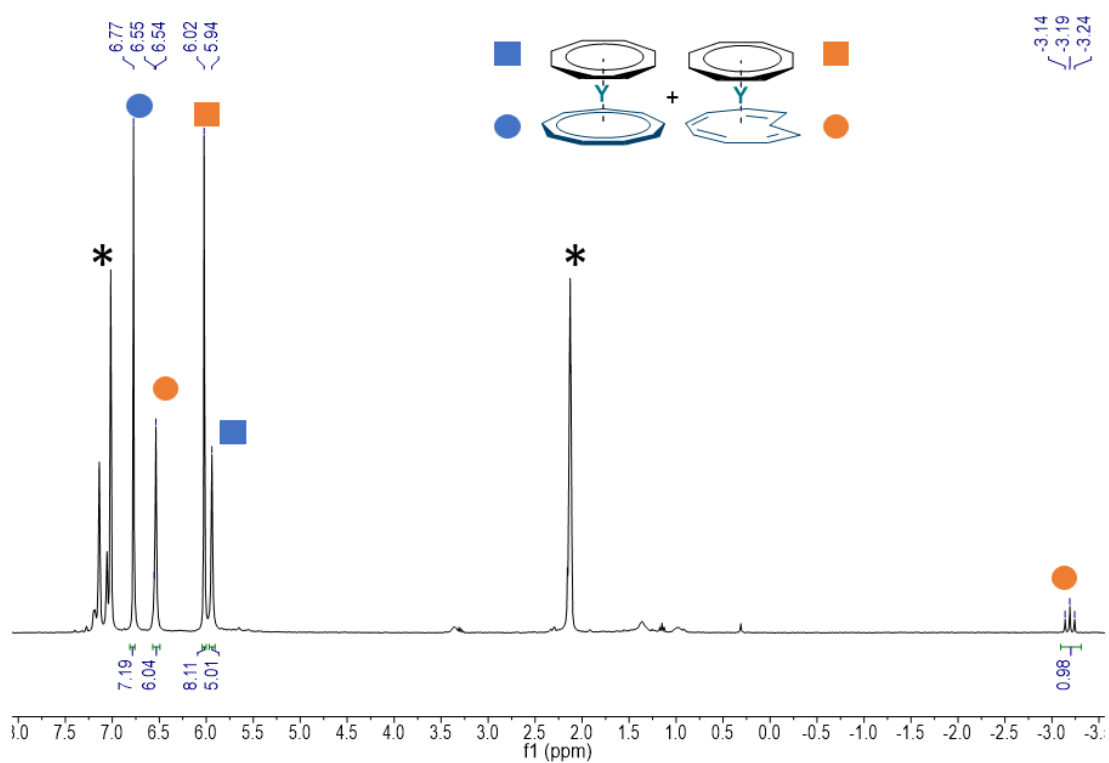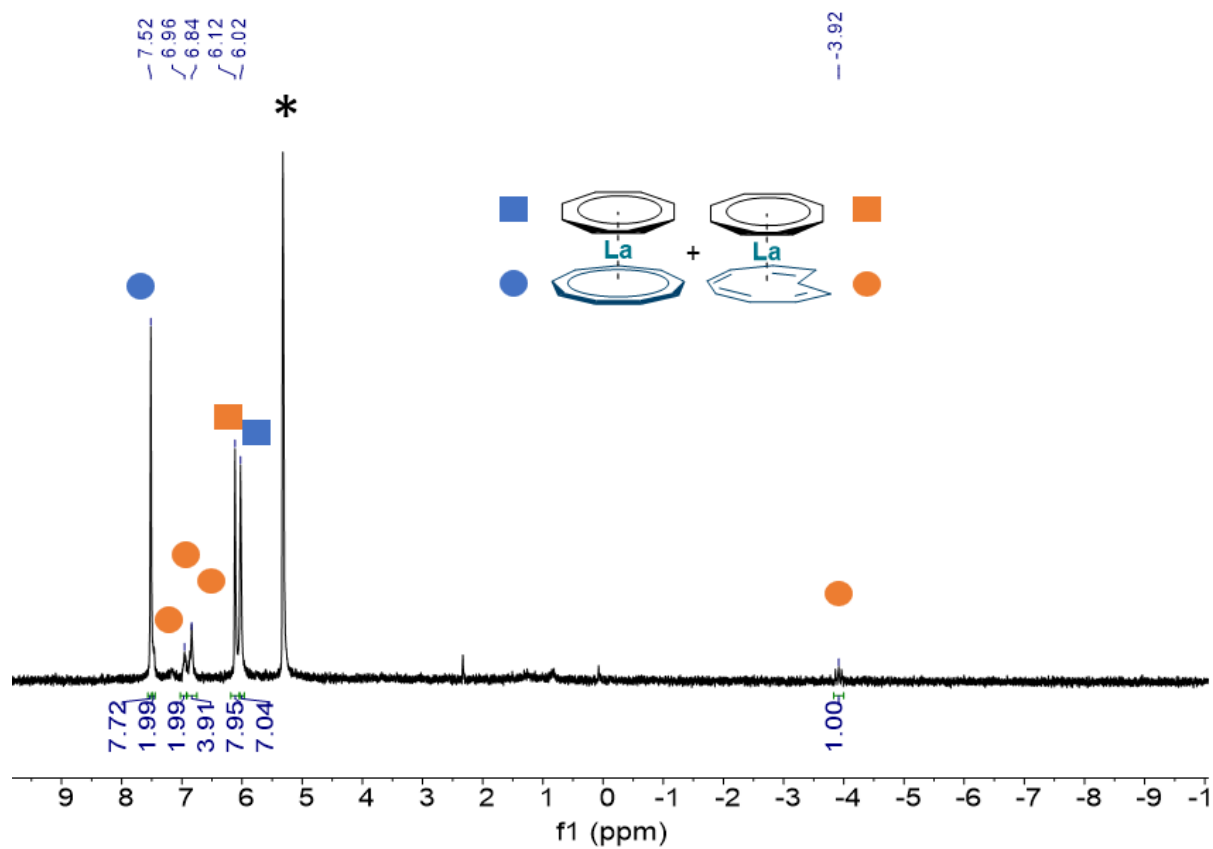



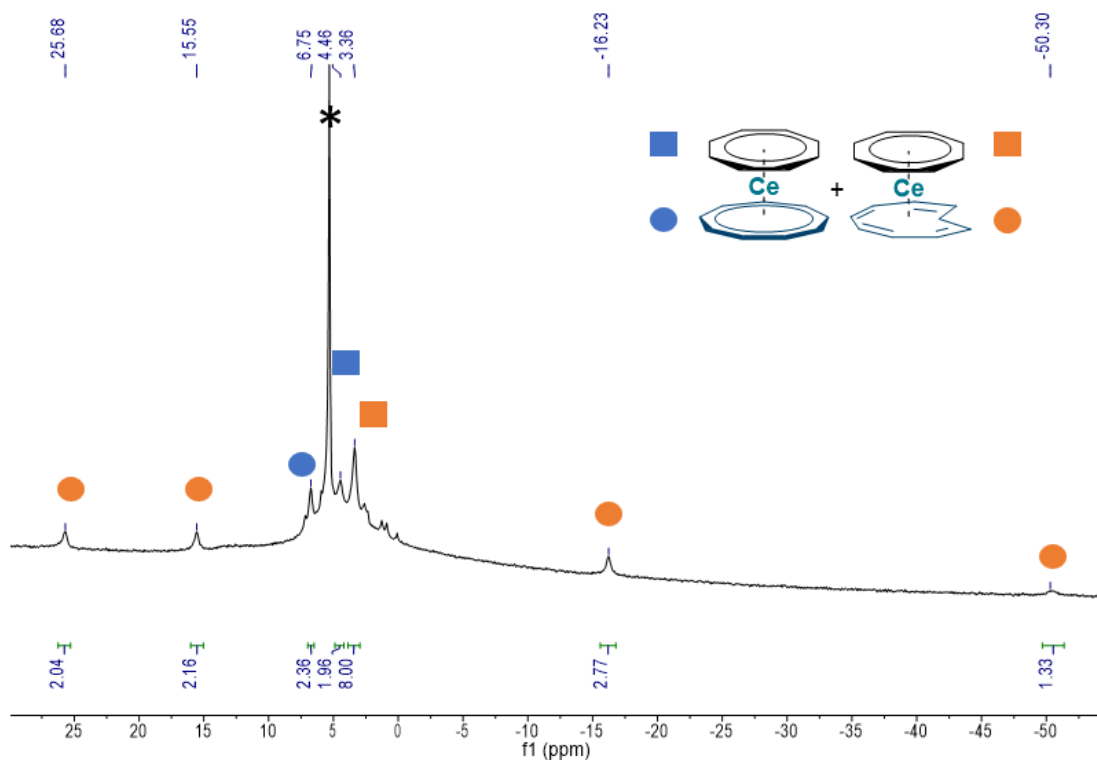

Figure S13:  $^1\text{H}$  NMR of 2-Ce-trans in  $\text{CD}_2\text{Cl}_2$  measured at 293 K (\* residual protio signal of the solvent).

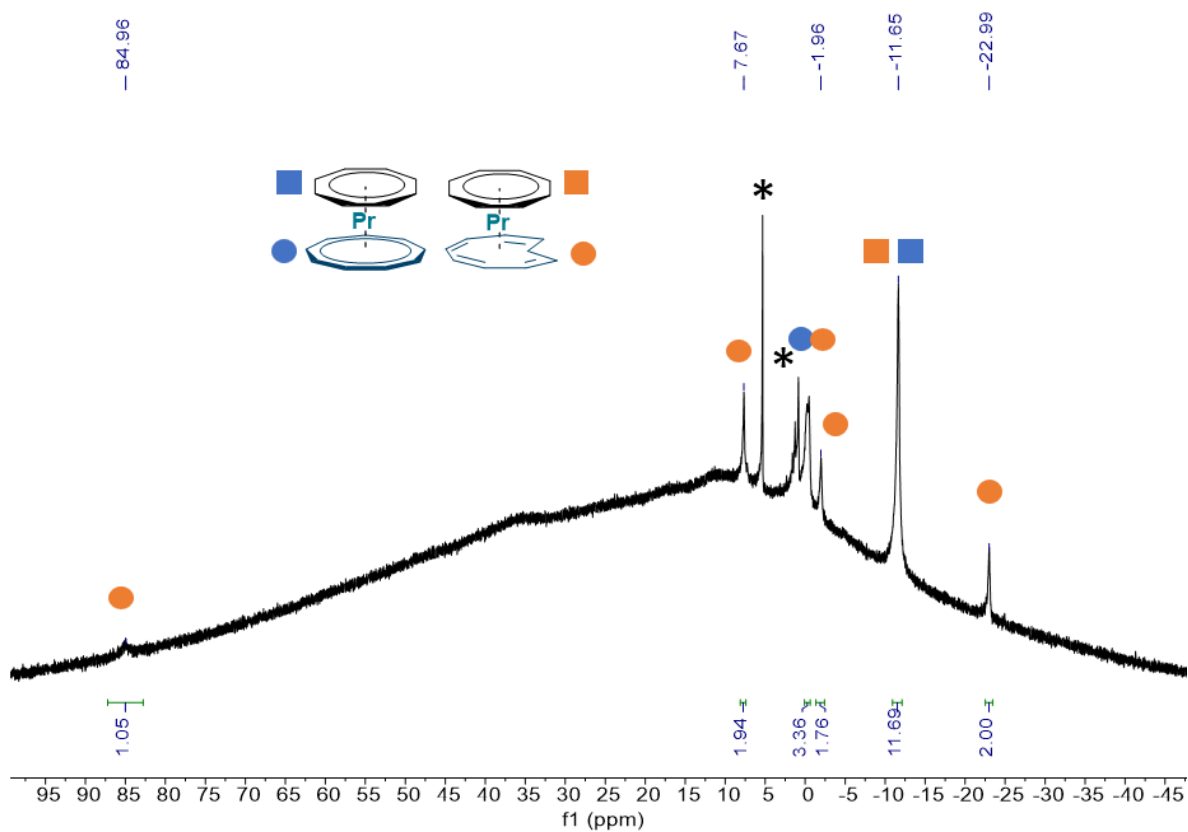

Figure S14:  $^1\text{H}$  NMR of 2-Pr-trans in  $\text{CD}_2\text{Cl}_2$  measured at 293 K (\* residual protio signal of the solvent).

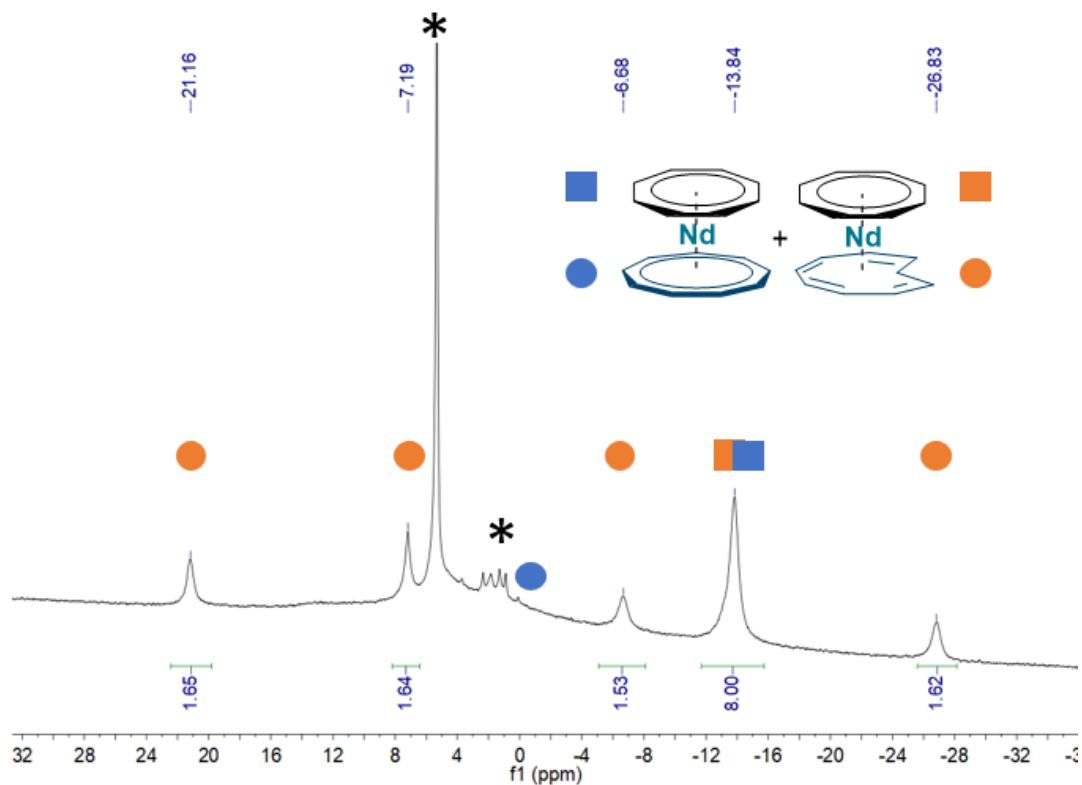

Figure S15:  $^1\text{H}$  NMR of 2-Nd-trans in  $\text{CD}_2\text{Cl}_2$  measured at 293 K (\* residual protio signal of the solvent).

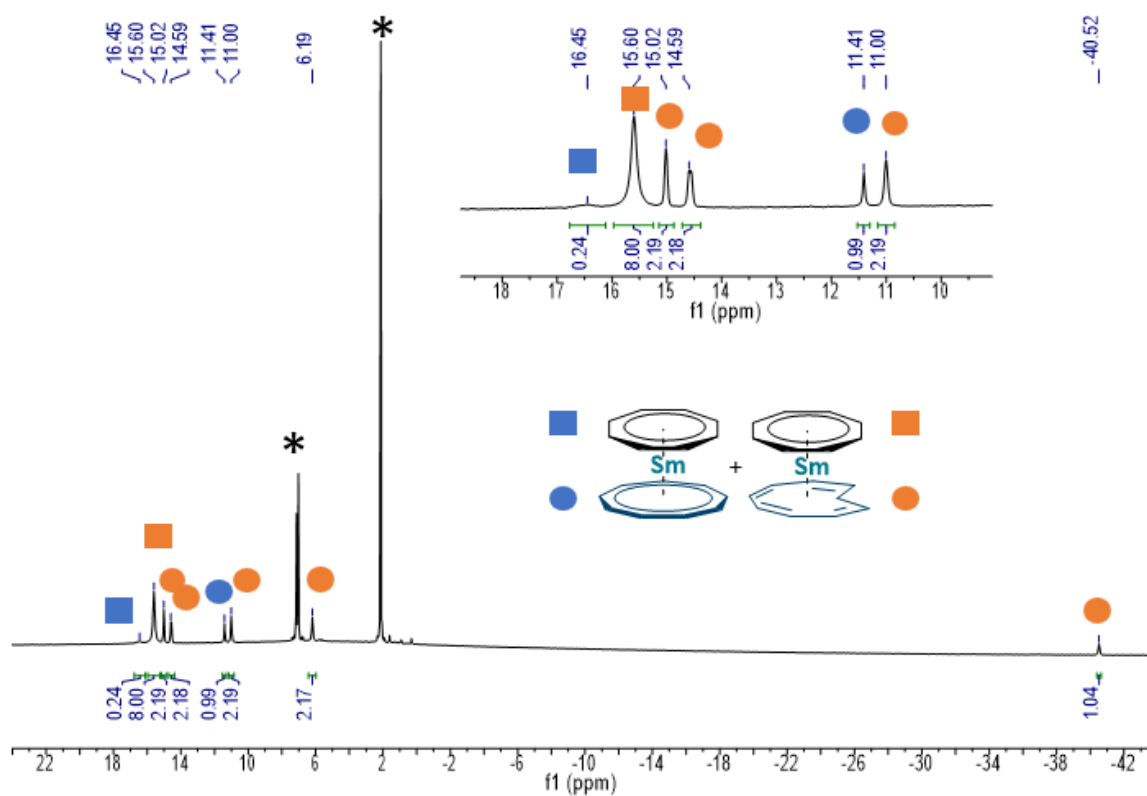

Figure S16:  $^1\text{H}$  NMR of 2-Sm-trans in  $\text{CD}_2\text{Cl}_2$  measured at 293 K (\* residual protio signal of the solvent).

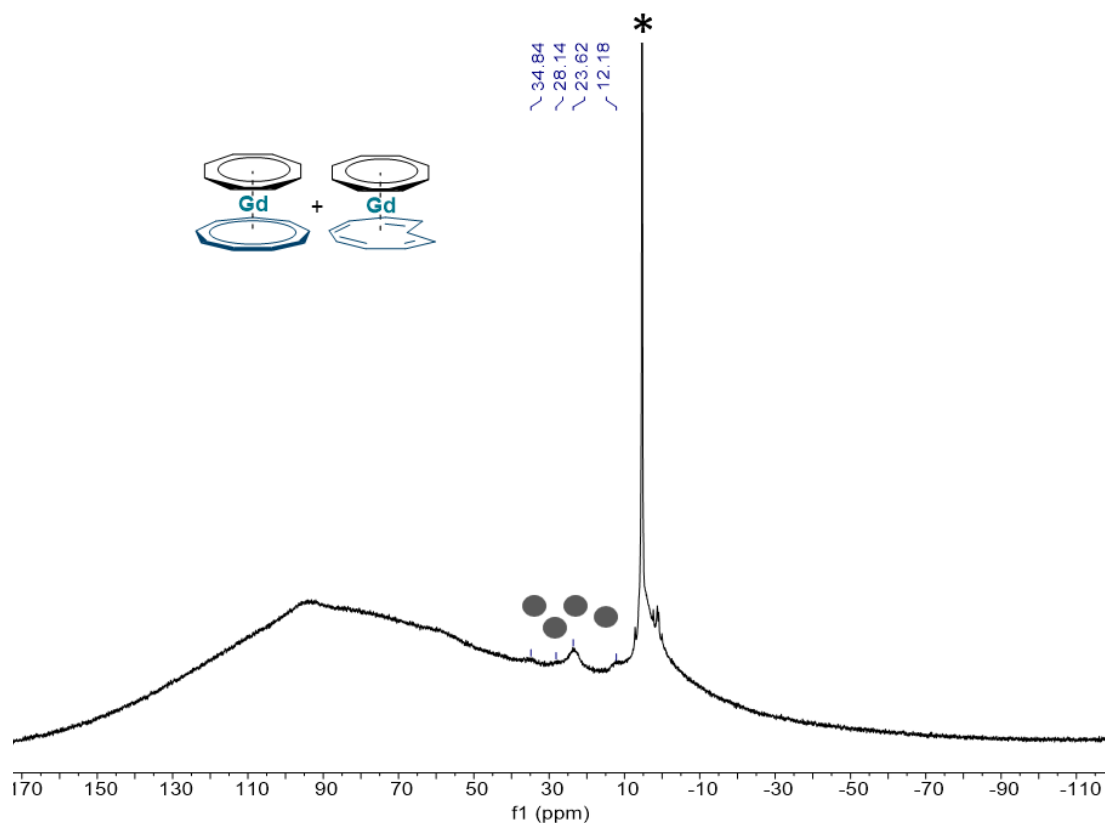

**Figure S17:**  $^1\text{H}$  NMR of 2-Gd-trans in  $\text{CD}_2\text{Cl}_2$  measured at 293 K (\* residual protio signal of the solvent). The uncertainty of integration does not allow the attribution.

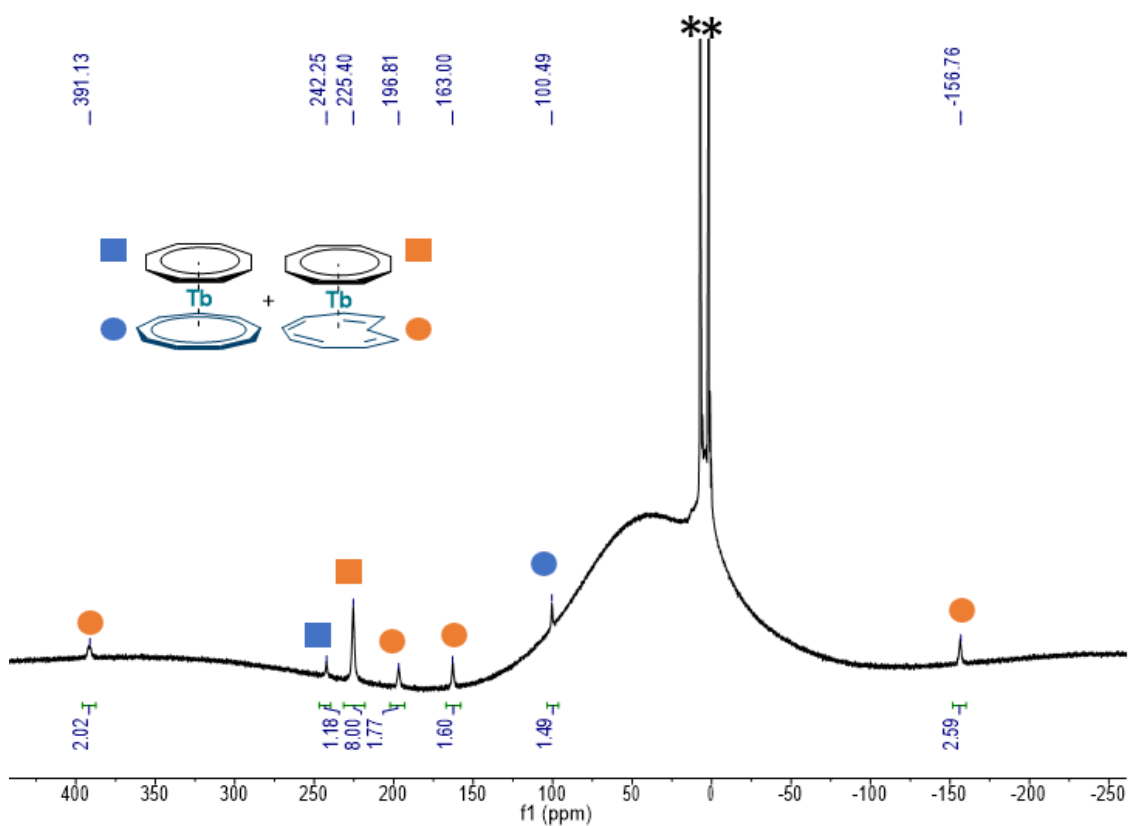

**Figure S18:**  $^1\text{H}$  NMR of 2-Tb-trans in toluene- $d_8$  measured at 293 K (\* residual protio signal of the solvent).

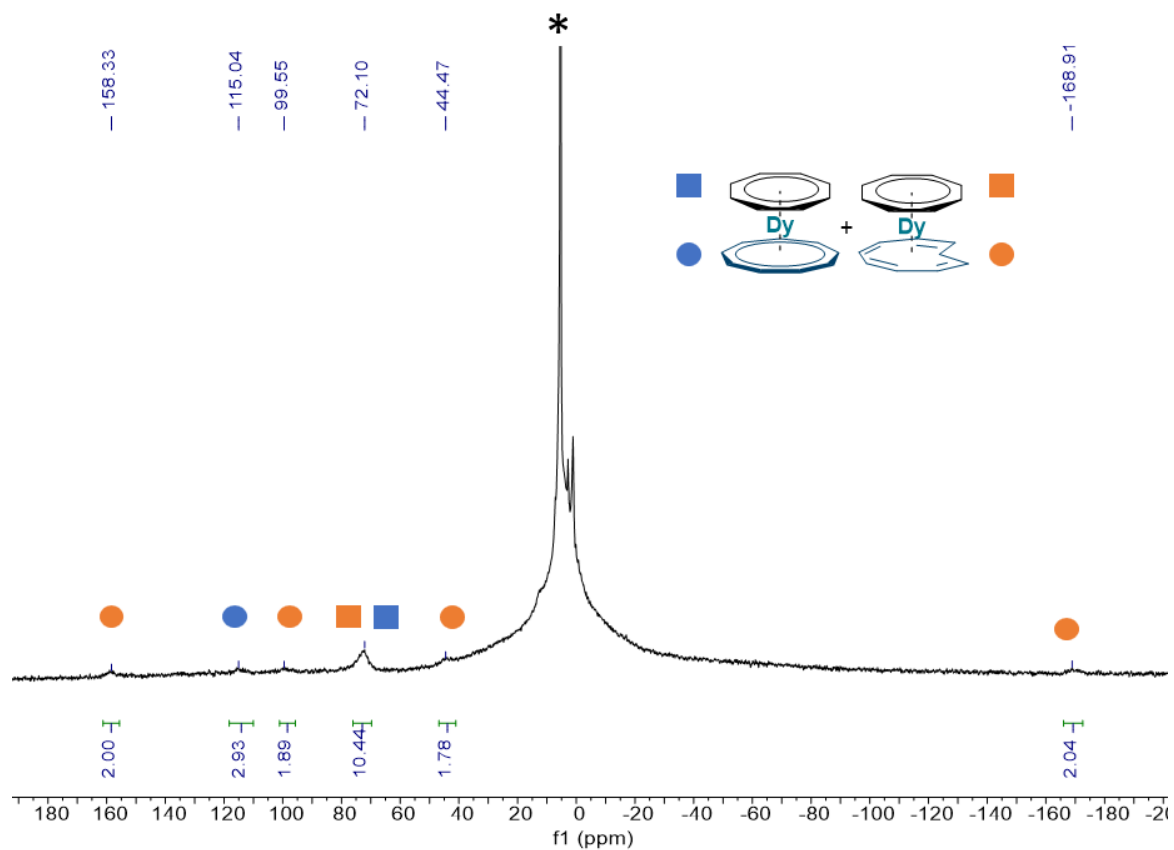

Figure S19:  $^1\text{H}$  NMR of **2-Dy-trans** in  $\text{CD}_2\text{Cl}_2$  measured at 293 K (\* residual proton signal of the solvent).

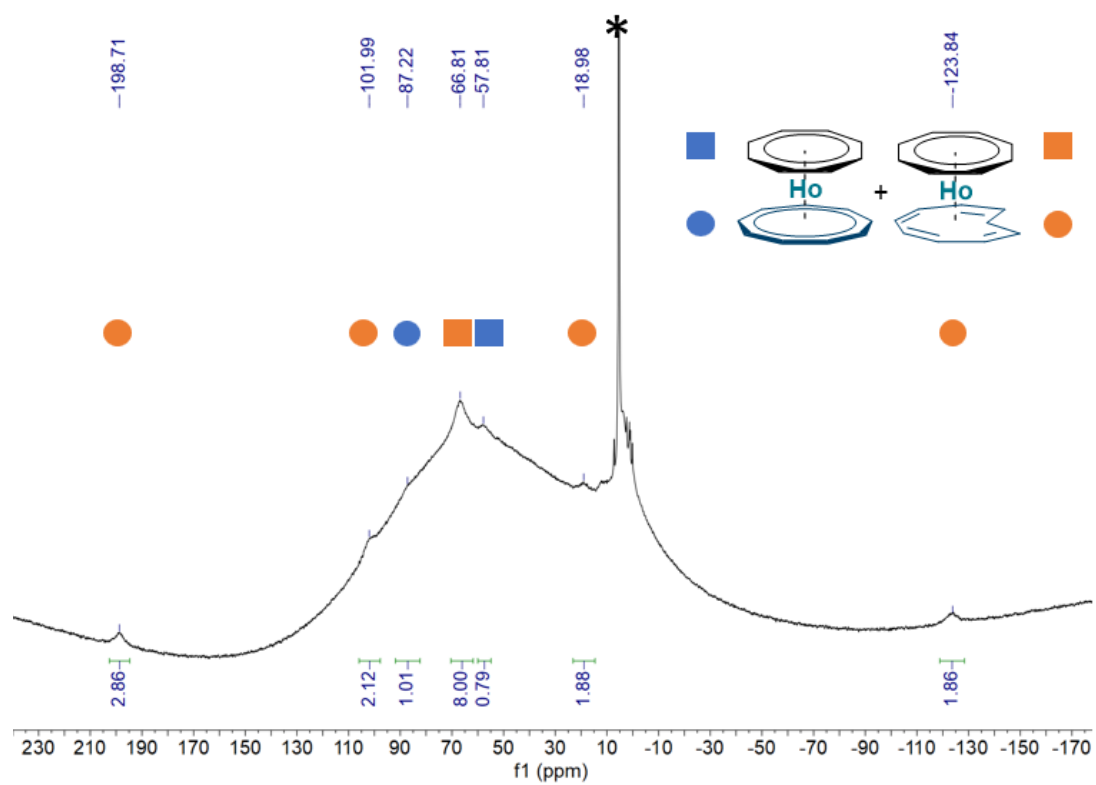

Figure S20:  $^1\text{H}$  NMR of **2-Ho-trans** in  $\text{CD}_2\text{Cl}_2$  measured at 293 K (\* residual proton signal of the solvent).

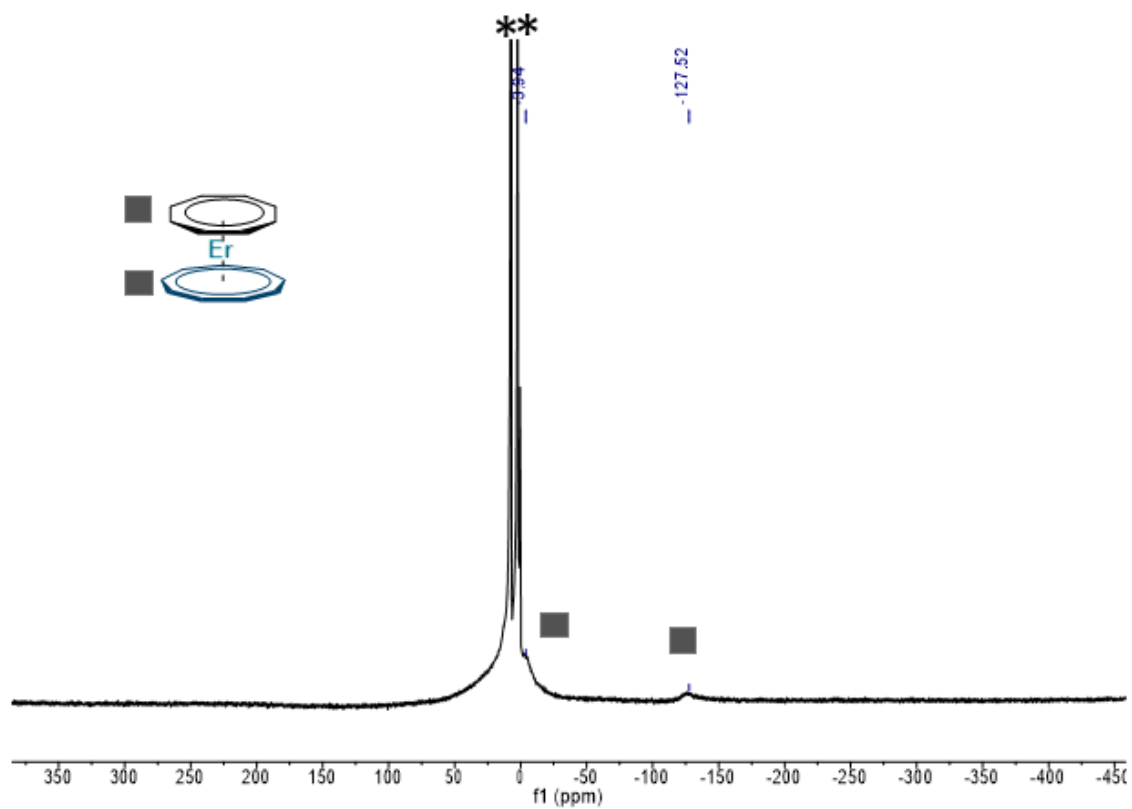

Figure S21:  $^1\text{H}$  NMR of 2-Er-cis in toluene- $d_8$  measured at 293 K (\* residual protio signal of the solvent).

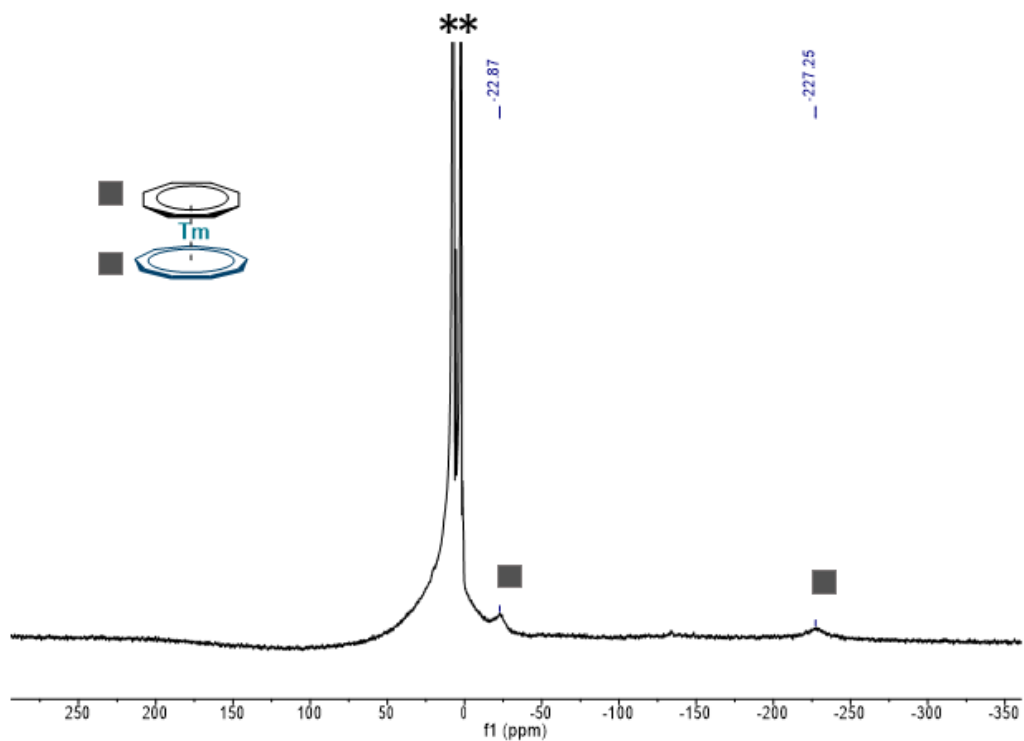

Figure S22:  $^1\text{H}$  NMR of 2-Tm-cis in toluene- $d_8$  measured at 293 K (\* residual protio signal of the solvent).

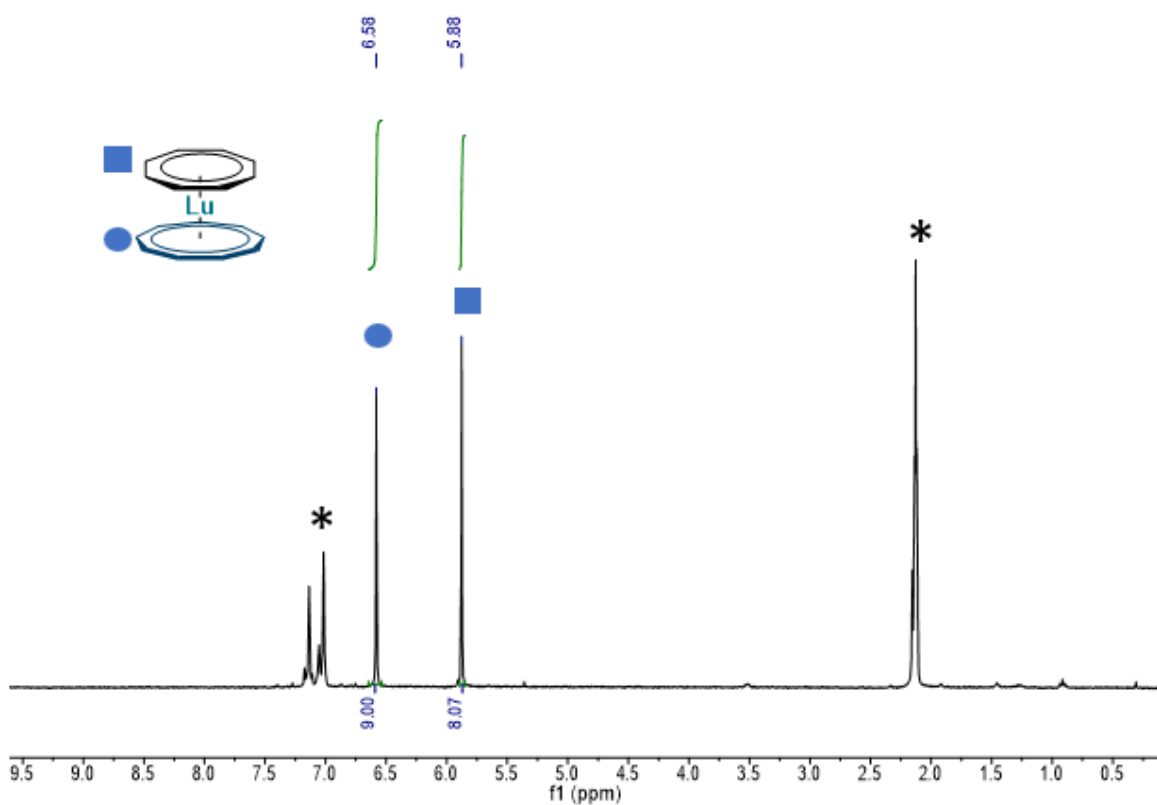

Figure S23:  $^1\text{H}$  NMR of 2-Lu-cis in toluene- $d_8$  measured at 293 K (\* residual protio signal of the solvent).

#### 4. IR Spectra

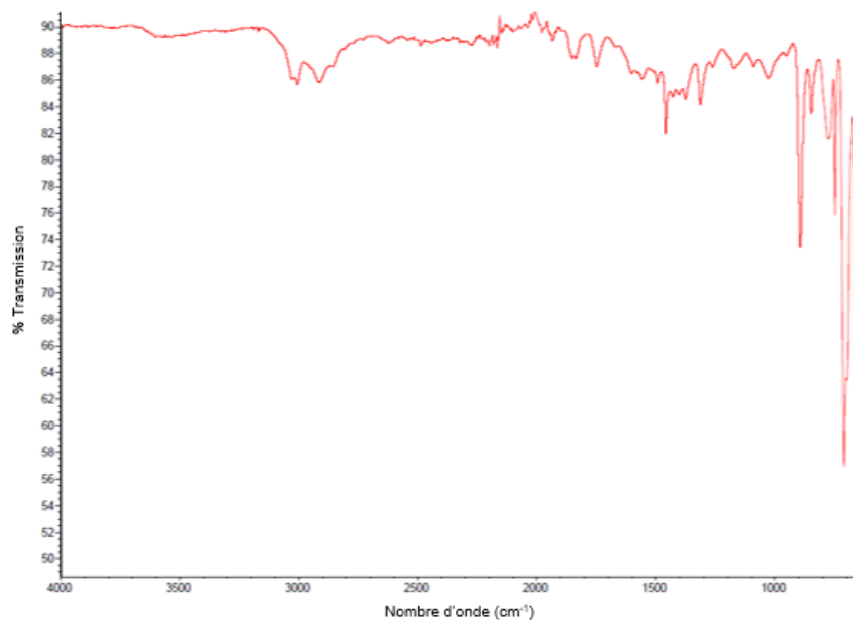

Figure S24: IR spectrum of 2-Tb-cis

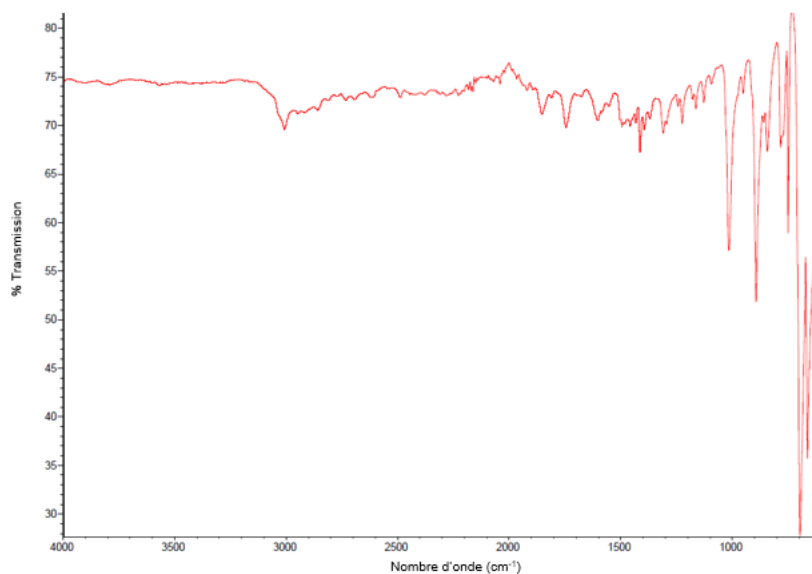

**Figure S25:** IR spectrum of **2-Tb-trans**

**Table S1:** Summary of stretches observed in both isomers of **2-Tb**. The intensity of the signals is characterized by *w* = weak, *m* = medium, *s* = strong

|                                | <b>2-Tb-cis</b> | <b>2-Tb-trans</b> |
|--------------------------------|-----------------|-------------------|
| Wavenumber (cm <sup>-1</sup> ) | 1457.20 (w)     | 1013.91 (m)       |
|                                | 892.06 (m)      | 891.95 (m)        |
|                                | 709.59 (s)      | 695.00 (s)        |
|                                | 654.30 (s)      | 661.54 (s)        |

## 5. X-ray crystallography

**General details.** Single crystals of the complexes suitable for X-ray analysis were mounted on a Kapton loop using a Paratone N oil. Two diffractometers were used during this for the data acquisition, either a Bruker diffractometer equipped with an APEX II CCD detector and a graphite Mo-K $\alpha$  monochromator or a Stoe stadivari diffractometer with a Eiger2 detector and a Mo-K $\alpha$  microsource. All measurements were done at 150 K (unless otherwise stated) and a refinement method was used for solving the structure. The resolution of the solid-state structure was accomplished using the SHELXS-97 or SHELXT programs. The refinement was performed with the SHELXL program using the Olex2 software. All atoms – except hydrogens – were refined anisotropically.

Atoms denoted C(X') refer to equivalent atoms constructed by the symmetry operation of the associated space group. For the Cnt ligand, the terme Cnt – 8C refers to the 8 atoms of the Cnt ligand excluding the isomerized atoms.

The molecular structure of **2** display as the thermal ellipsoids that are depicted at 50% probability level. The center atom represents the corresponding Ln and are depicted with different colors and carbon atoms are in grey. Hydrogen atoms and disorder of the Cot and the Cnt ligand are omitted for clarity. The blue and red spots represent the constructed centroids for Cnt-*cis* and Cot respectively. The purple and orange spots represent the constructed centroids for Cnt – 8C and Cnt-*trans* respectively. Moreover, the data presents a disorder, typical for this family of complexes. The heavy Y atom is disordered over two positions, close to the symmetry element, resulting with high calculated residual

electronic density. This peculiar disorder explains checkcif alerts about calculated residual electronic density. The C8 and C9 aromatic ligands are also disordered, resulting in low C-C bond precision. For the modelisation of the **2-Ln-trans** three behaviors have been observed alongside the series. First for the late lanthanides the modelisation of a *trans*-Cnt allowed accurate portrayal of the electronic density showing very low amount of *cis*-Cnt present in the lattice. Then as demonstrated in Fig. S24, Gd and Sm did necessitate the modelisation of a disorder for one carbon atom between the *cis* and *trans* position. Finally, for La, Ce, Pr and Nd, two disordered and eclipsed Cnt rings were used to accurately represent the electronic density. One of them featuring a carbon in the *trans* position and the other one in the *cis* position as shown in Fig. S38-39.

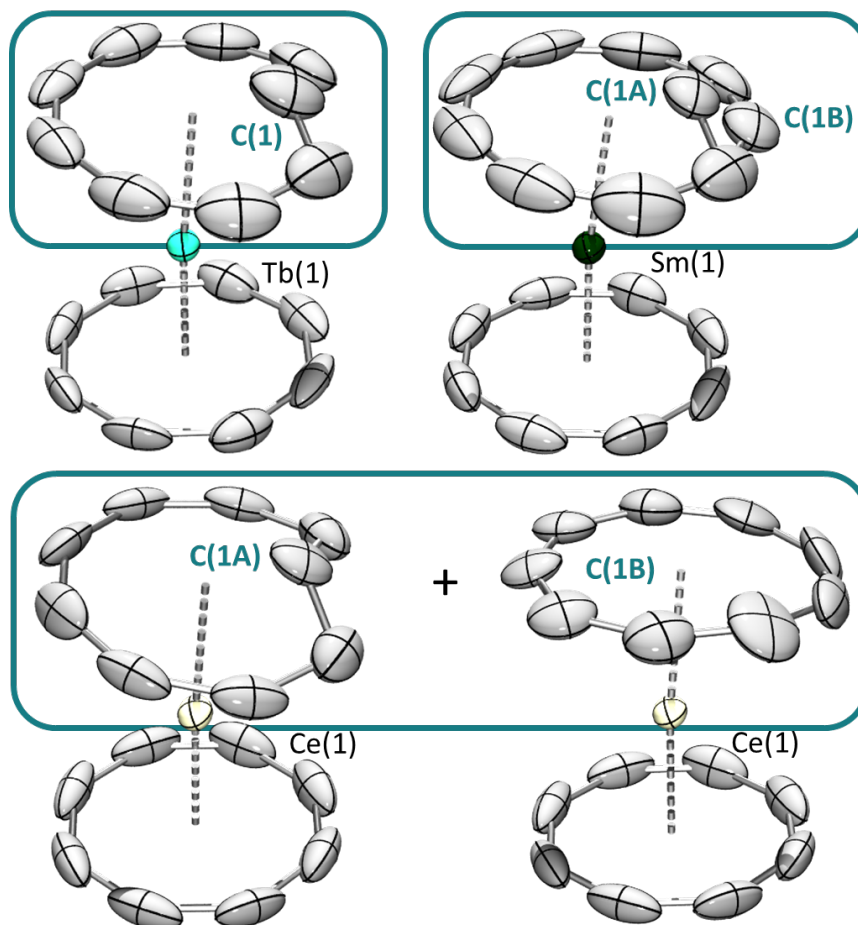

Figure S 26: Representation of the different model used for the LnCot(*trans*-Cnt) complexes



Table S 2: Crystallographic data, details of data collection and structure refinement parameters of all 2

| Compound                                         | YCot(Cnt-cis)                                        | LaCot(Cnt-cis)                                       | CeCot(Cnt-cis)                                       |
|--------------------------------------------------|------------------------------------------------------|------------------------------------------------------|------------------------------------------------------|
| Formula                                          | C <sub>17</sub> H <sub>17</sub> Y                    | C <sub>17</sub> H <sub>17</sub> La                   | C <sub>17</sub> H <sub>17</sub> Ce                   |
| Crystal size (mm <sup>3</sup> )                  | 0.15x0.04x0.02                                       | 0.14 x 0.06 x 0.03                                   | 0.2x0.02x0.02                                        |
| Crystal system                                   | Monoclinic                                           | Orthorhombic                                         | Orthorhombic                                         |
| Space group                                      | P2 <sub>1</sub> /n                                   | Pnma                                                 | Pnma                                                 |
| Volume (Å <sup>3</sup> )                         | 671.15(10)                                           | 1392.9(6)                                            | 1381.6(3)                                            |
| a (Å)                                            | 7.0169(6)                                            | 12.187(3)                                            | 12.1258(14)                                          |
| b (Å)                                            | 8.7585(8)                                            | 12.736(3)                                            | 12.7752(16)                                          |
| c (Å)                                            | 11.1560(9)                                           | 8.974(2)                                             | 8.9190(10)                                           |
| α (deg)                                          | 90                                                   | 90                                                   | 90                                                   |
| β (deg)                                          | 101.791(6)                                           | 90                                                   | 90                                                   |
| γ (deg)                                          | 90                                                   | 90                                                   | 90                                                   |
| Z                                                | 4                                                    | 4                                                    | 4                                                    |
| Formula weight (g/mol)                           | 310.21                                               | 360.21                                               | 361.42                                               |
| Density (calcd) (g/cm <sup>3</sup> )             | 3.070                                                | 1.718                                                | 1.738                                                |
| Absorption coefficient (mm <sup>-1</sup> )       | 8.645                                                | 3.046                                                | 3.273                                                |
| F(000)                                           | 632.0                                                | 704.0                                                | 708.0                                                |
| Temp (K)                                         | 150                                                  | 150                                                  | 150                                                  |
| diffractometer                                   | Stoe Stadivari                                       | Bruker APEX-II CCD                                   | Bruker APEX-II CCD                                   |
| Radiation                                        | Mo Kα (λ = 0.71073)                                  | MoKα (λ = 0.71073)                                   | MoKα (λ = 0.71073)                                   |
| 2θ range for data collection (deg)               | 5.962 to 54.968                                      | 5.554 to 54.958                                      | 5.57 to 56.544                                       |
| Absorption correction                            | Multi-scan                                           | Multi-scan                                           | Multi-scan                                           |
| Total no. reflections                            | 6569                                                 | 21648                                                | 27170                                                |
| Unique reflections [R <sub>int</sub> ]           | 1635 [R <sub>int</sub> = 0.0446]                     | 1674 [R <sub>int</sub> = 0.1354]                     | 1786 [R <sub>int</sub> = 0.0965]                     |
| Final R indices [I>2σ(I)]                        | R <sub>1</sub> = 0.1254, wR <sub>2</sub> =<br>0.2668 | R <sub>1</sub> = 0.0363, wR <sub>2</sub> =<br>0.0785 | R <sub>1</sub> = 0.0267, wR <sub>2</sub> =<br>0.0562 |
| R indices (all data)                             | R <sub>1</sub> = 0.1367, wR <sub>2</sub> =<br>0.2712 | R <sub>1</sub> = 0.0879, wR <sub>2</sub> =<br>0.0980 | R <sub>1</sub> = 0.0635, wR <sub>2</sub> =<br>0.0676 |
| Largest diff. peak and hole (e.Å <sup>-3</sup> ) | 3.30/-4.35                                           | 0.72/-1.06                                           | 0.65/-0.76                                           |
| Goof                                             | 1.171                                                | 1.011                                                | 1.009                                                |

| <b>Compound</b>                                  | <b>PrCot(Cnt-cis)</b>                                | <b>NdCot(Cnt-cis)</b>                                | <b>SmCot(Cnt-cis)</b>                                |
|--------------------------------------------------|------------------------------------------------------|------------------------------------------------------|------------------------------------------------------|
| Formula                                          | C <sub>17</sub> H <sub>17</sub> Pr                   | C <sub>17</sub> H <sub>17</sub> Nd                   | C <sub>17</sub> H <sub>17</sub> Sm                   |
| Crystal size (mm <sup>3</sup> )                  | 0.12x0.03x0.03                                       | 0.24x0.03x0.02                                       | -                                                    |
| Crystal system                                   | Orthorhombic                                         | Orthorhombic                                         | Orthorhombic                                         |
| Space group                                      | Pnma                                                 | Pnma                                                 | Pnma                                                 |
| Volume (Å <sup>3</sup> )                         | 1365.3(8)                                            | 1368.1(14)                                           | 1356.78(15)                                          |
| a (Å)                                            | 12.055(4)                                            | 12.0748(18)                                          | 11.9982(8)                                           |
| b (Å)                                            | 12.777(5)                                            | 12.8129(19)                                          | 12.8760(8)                                           |
| c (Å)                                            | 8.864(3)                                             | 8.8427(14)                                           | 8.7824(6)                                            |
| α (deg)                                          | 90                                                   | 90                                                   | 90                                                   |
| β (deg)                                          | 90                                                   | 90                                                   | 90                                                   |
| γ (deg)                                          | 90                                                   | 90                                                   | 90                                                   |
| Z                                                | 4                                                    | 4                                                    | 4                                                    |
| Formula weight (g/mol)                           | 362.21                                               | 365.54                                               | 371.65                                               |
| Density (calcd) (g/cm <sup>3</sup> )             | 1.762                                                | 1.775                                                | 1.819                                                |
| Absorption coefficient (mm <sup>-1</sup> )       | 3.547                                                | 3.773                                                | 4.306                                                |
| F(000)                                           | 712.0                                                | 716.0                                                | 724.0                                                |
| Temp (K)                                         | 150                                                  | 150                                                  | 150                                                  |
| diffractometer                                   | Bruker APEX-II CCD                                   | Bruker APEX-II CCD                                   | Bruker APEX-II CCD                                   |
| Radiation                                        | MoKα (λ = 0.71073)                                   | MoKα (λ = 0.71073)                                   | MoKα (λ = 0.71073)                                   |
| 2θ range for data collection (deg)               | 5.594 to 51.992                                      | 5.598 to 59.346                                      | 5.614 to 71.262                                      |
| Absorption correction                            | Multi-scan                                           | Multi-scan                                           | Multi-scan                                           |
| Total no. reflections                            | 7946                                                 | 28912                                                | 107017                                               |
| Unique reflections [R <sub>int</sub> ]           | 1404 [R <sub>int</sub> = 0.1682]                     | 1986 [R <sub>int</sub> = 0.1464]                     | 3242 [R <sub>int</sub> = 0.1536]                     |
| Final R indices [I>2σ(I)]                        | R <sub>1</sub> = 0.0528, wR <sub>2</sub> =<br>0.1097 | R <sub>1</sub> = 0.0389, wR <sub>2</sub> =<br>0.0861 | R <sub>1</sub> = 0.0324, wR <sub>2</sub> =<br>0.0679 |
| R indices (all data)                             | R <sub>1</sub> = 0.1319, wR <sub>2</sub> =<br>0.1445 | R <sub>1</sub> = 0.1015, wR <sub>2</sub> =<br>0.1087 | R <sub>1</sub> = 0.0631, wR <sub>2</sub> =<br>0.0822 |
| Largest diff. peak and hole (e.Å <sup>-3</sup> ) | 1.25/-1.22                                           | 1.96/-1.07                                           | 1.50/-1.41                                           |
| Goof                                             | 1.007                                                | 1.022                                                | 1.009                                                |

| <b>Compound</b>                                  | <b>GdCot(Cnt-<i>cis</i>)</b>                         | <b>YCot(Cnt-<i>trans</i>)</b>                        | <b>LaCot(Cnt-<i>trans</i>)</b>                       |
|--------------------------------------------------|------------------------------------------------------|------------------------------------------------------|------------------------------------------------------|
| Formula                                          | C <sub>17</sub> H <sub>17</sub> Gd                   | C <sub>17</sub> H <sub>17</sub> Y                    | C <sub>17</sub> H <sub>17</sub> La                   |
| Crystal size (mm <sup>3</sup> )                  | 0.14x0.03x0.03                                       | 0.17x0.08x0.04                                       | 0.12x0.06x0.03                                       |
| Crystal system                                   | Orthorhombic                                         | Orthorhombic                                         | Orthorhombic                                         |
| Space group                                      | Pnma                                                 | Pnma                                                 | Pnma                                                 |
| Volume (Å <sup>3</sup> )                         | 1348.0(3)                                            | 1335.5(3)                                            | 1385.3(2)                                            |
| a (Å)                                            | 11.965(15)                                           | 11.7622(15)                                          | 12.1385(7)                                           |
| b (Å)                                            | 12.9116(19)                                          | 13.1214(18)                                          | 12.7452(11)                                          |
| c (Å)                                            | 8.7283(10)                                           | 8.6532(11)                                           | 8.9543(11)                                           |
| α (deg)                                          | 90                                                   | 90                                                   | 90                                                   |
| β (deg)                                          | 90                                                   | 90                                                   | 90                                                   |
| γ (deg)                                          | 90                                                   | 90                                                   | 90                                                   |
| Z                                                | 4                                                    | 4                                                    | 4                                                    |
| Formula weight (g/mol)                           | 378.55                                               | 310.21                                               | 360.21                                               |
| Density (calcd) (g/cm <sup>3</sup> )             | 1.865                                                | 1.543                                                | 1.727                                                |
| Absorption coefficient (mm <sup>-1</sup> )       | 4.898                                                | 4.345                                                | 3.062                                                |
| F(000)                                           | 732.0                                                | 632.0                                                | 704.0                                                |
| Temp (K)                                         | 150                                                  | 150                                                  | 150                                                  |
| diffractometer                                   | Bruker APEX-II CCD                                   | Bruker APEX-II CCD                                   | Stoe Stadivari                                       |
| Radiation                                        | MoKα (λ = 0.71073)                                   | MoKα (λ = 0.71073)                                   | MoKα (λ = 0.71073)                                   |
| 2θ range for data collection (deg)               | 5.634 to 54.954                                      | 5.64 to 55.28                                        | 5.56 to 58.68                                        |
| Absorption correction                            | Multi-scan                                           | Multi-scan                                           | Multi-scan                                           |
| Total no. reflections                            | 8390                                                 | 10027                                                | 14590                                                |
| Unique reflections [R <sub>int</sub> ]           | 1618 [R <sub>int</sub> = 0.1237]                     | 1614 [R <sub>int</sub> = 0.1667]                     | 1840 [R <sub>int</sub> = 0.0335]                     |
| Final R indices [I>2σ(I)]                        | R <sub>1</sub> = 0.0486, wR <sub>2</sub> =<br>0.0960 | R <sub>1</sub> = 0.0536, wR <sub>2</sub> =<br>0.1128 | R <sub>1</sub> = 0.0231, wR <sub>2</sub> =<br>0.0537 |
| R indices (all data)                             | R <sub>1</sub> = 0.1100, wR <sub>2</sub> =<br>0.1171 | R <sub>1</sub> = 0.1092, wR <sub>2</sub> =<br>0.1370 | R <sub>1</sub> = 0.0378, wR <sub>2</sub> =<br>0.0554 |
| Largest diff. peak and hole (e.Å <sup>-3</sup> ) | 0.88/-1.18                                           | 0.55/-0.79                                           | 1.24/-0.41                                           |
| Goof                                             | 0.997                                                | 1.017                                                | 0.918                                                |

| Compound                                         | CeCot(Cnt-trans)                                     | PrCot(Cnt-trans)                                     | NdCot(Cnt-trans)                                     |
|--------------------------------------------------|------------------------------------------------------|------------------------------------------------------|------------------------------------------------------|
| Formula                                          | C <sub>17</sub> H <sub>17</sub> Ce                   | C <sub>17</sub> H <sub>17</sub> Pr                   | C <sub>17</sub> H <sub>17</sub> Nd                   |
| Crystal size (mm <sup>3</sup> )                  | 0.118x0.03x0.24                                      | 0.083x0.049x0.032                                    | 0.2x0.04x0.02                                        |
| Crystal system                                   | Orthorhombic                                         | Orthorhombic                                         | Orthorhombic                                         |
| Space group                                      | Pnma                                                 | Pnma                                                 | Pnma                                                 |
| Volume (Å <sup>3</sup> )                         | 1381.8(2)                                            | 1369.48(16)                                          | 1370.2(5)                                            |
| a (Å)                                            | 12.0523(9)                                           | 12.0063(7)                                           | 11.983(2)                                            |
| b (Å)                                            | 12.8172(12)                                          | 12.8295(10)                                          | 12.877(3)                                            |
| c (Å)                                            | 8.9448(10)                                           | 8.8907(6)                                            | 8.8927(17)                                           |
| α (deg)                                          | 90                                                   | 90                                                   | 90                                                   |
| β (deg)                                          | 90                                                   | 90                                                   | 90                                                   |
| γ (deg)                                          | 90                                                   | 90                                                   | 90                                                   |
| Z                                                | 4                                                    | 4                                                    | 4                                                    |
| Formula weight (g/mol)                           | 361.52                                               | 362.21                                               | 365.54                                               |
| Density (calcd) (g/cm <sup>3</sup> )             | 1.738                                                | 1.757                                                | 1.769                                                |
| Absorption coefficient (mm <sup>-1</sup> )       | 3.273                                                | 3.536                                                | 3.762                                                |
| F(000)                                           | 708.0                                                | 712.0                                                | 716.0                                                |
| Temp (K)                                         | 150                                                  | 150                                                  | 150                                                  |
| diffractometer                                   | Stoe Stadivari                                       | Stoe Stadivari                                       | Bruker APEX-II CCD                                   |
| Radiation                                        | MoKα (λ = 0.71073)                                   | MoKα (λ = 0.71073)                                   | MoKα (λ = 0.71073)                                   |
| 2θ range for data collection (deg)               | 5.554 to 61.224                                      | 5.574 to 54.198                                      | 5.568 to 52.292                                      |
| Absorption correction                            | Multi-scan                                           | Multi-scan                                           | Multi-scan                                           |
| Total no. reflections                            | 12034                                                | 5122                                                 | 15587                                                |
| Unique reflections [R <sub>int</sub> ]           | 2056 [R <sub>int</sub> = 0.0622]                     | 1536 [R <sub>int</sub> = 0.0542]                     | 1435 [R <sub>int</sub> = 0.1352]                     |
| Final R indices [I > 2σ(I)]                      | R <sub>1</sub> = 0.0328, wR <sub>2</sub> =<br>0.0629 | R <sub>1</sub> = 0.0342, wR <sub>2</sub> =<br>0.0608 | R <sub>1</sub> = 0.0396, wR <sub>2</sub> =<br>0.0849 |
| R indices (all data)                             | R <sub>1</sub> = 0.0714, wR <sub>2</sub> =<br>0.0688 | R <sub>1</sub> = 0.0771, wR <sub>2</sub> =<br>0.0663 | R <sub>1</sub> = 0.0885, wR <sub>2</sub> =<br>0.1043 |
| Largest diff. peak and hole (e.Å <sup>-3</sup> ) | 1.08/-0.71                                           | 0.97/-0.64                                           | 0.90/-1.89                                           |
| Goof                                             | 0.917                                                | 0.788                                                | 1.047                                                |

| <b>Compound</b>                                  | <b>SmCot(Cnt-trans)</b>                              | <b>GdCot(Cnt-trans)</b>                              | <b>TbCot(Cnt-trans)</b>                              |
|--------------------------------------------------|------------------------------------------------------|------------------------------------------------------|------------------------------------------------------|
| Formula                                          | C <sub>17</sub> H <sub>17</sub> Sm                   | C <sub>17</sub> H <sub>17</sub> Gd                   | C <sub>17</sub> H <sub>17</sub> Tb                   |
| Crystal size (mm <sup>3</sup> )                  | 0.47 x 0.287 x 0.07                                  | 0.087x0.045x0.032                                    | 0.14x0.04x0.04                                       |
| Crystal system                                   | Orthorhombic                                         | Orthorhombic                                         | Orthorhombic                                         |
| Space group                                      | Pnma                                                 | Pnma                                                 | Pnma                                                 |
| Volume (Å <sup>3</sup> )                         | 1355.13(14)                                          | 1348.36(15)                                          | 1335.5(13)                                           |
| a (Å)                                            | 11.8943(7)                                           | 11.8553(8)                                           | 11.781(6)                                            |
| b (Å)                                            | 12.9414(6)                                           | 13.0113(8)                                           | 13.017(8)                                            |
| c (Å)                                            | 8.8036(6)                                            | 8.7412(6)                                            | 8.708(5)                                             |
| α (deg)                                          | 90                                                   | 90                                                   | 90                                                   |
| β (deg)                                          | 90                                                   | 90                                                   | 90                                                   |
| γ (deg)                                          | 90                                                   | 90                                                   | 90                                                   |
| Z                                                | 4                                                    | 4                                                    | 4                                                    |
| Formula weight (g/mol)                           | 371.65                                               | 378.55                                               | 380.22                                               |
| Density (calcd) (g/cm <sup>3</sup> )             | 1.822                                                | 1.865                                                | 1.891                                                |
| Absorption coefficient (mm <sup>-1</sup> )       | 4.311                                                | 4.897                                                | 5.273                                                |
| F(000)                                           | 724.0                                                | 732.0                                                | 736.0                                                |
| Temp (K)                                         | 150                                                  | 150                                                  | 150                                                  |
| diffractometer                                   | Stoe Stadivari                                       | Stoe Stadivari                                       | Bruker APEX-II CCD                                   |
| Radiation                                        | MoKα (λ = 0.71073)                                   | MoKα (λ = 0.71073)                                   | MoKα (λ = 0.71073)                                   |
| 2θ range for data collection (deg)               | 5.596 to 54.2                                        | 5.614 to 54.206                                      | 5.628 to 54.204                                      |
| Absorption correction                            | Multi-scan                                           | Multi-scan                                           | Multi-scan                                           |
| Total no. reflections                            | 7609                                                 | 6971                                                 | 17144                                                |
| Unique reflections [R <sub>int</sub> ]           | 1454 [R <sub>int</sub> = 0.0533]                     | 1552 [R <sub>int</sub> = 0.0699]                     | 1539 [R <sub>int</sub> = 0.1491]                     |
| Final R indices [I>2σ(I)]                        | R <sub>1</sub> = 0.0323, wR <sub>2</sub> =<br>0.0697 | R <sub>1</sub> = 0.0397, wR <sub>2</sub> =<br>0.0866 | R <sub>1</sub> = 0.0447, wR <sub>2</sub> =<br>0.1093 |
| R indices (all data)                             | R <sub>1</sub> = 0.0561, wR <sub>2</sub> =<br>0.0763 | R <sub>1</sub> = 0.0643, wR <sub>2</sub> =<br>0.0915 | R <sub>1</sub> = 0.0726, wR <sub>2</sub> =<br>0.1274 |
| Largest diff. peak and hole (e.Å <sup>-3</sup> ) | 0.93/-0.67                                           | 1.38/-0.86                                           | 1.60/-2.27                                           |
| Goof                                             | 0.958                                                | 0.933                                                | 1.101                                                |

| Compound                                         | DyCot(Cnt- <i>trans</i> )                            | HoCot(Cnt- <i>trans</i> )                            | Sm(Cnt) <sub>2</sub> *                               |
|--------------------------------------------------|------------------------------------------------------|------------------------------------------------------|------------------------------------------------------|
| Formula                                          | C <sub>17</sub> H <sub>17</sub> Dy                   | C <sub>17</sub> H <sub>17</sub> Ho                   | C <sub>18</sub> H <sub>18</sub> Sm                   |
| Crystal size (mm <sup>3</sup> )                  | 0.64x0.08x0.06                                       | 0.1x0.04x0.02                                        | 0.097 × 0.09 × 0.055                                 |
| Crystal system                                   | Orthorhombic                                         | Orthorhombic                                         | Monoclinic                                           |
| Space group                                      | Pnma                                                 | Pnma                                                 | P2 <sub>1</sub> /n                                   |
| Volume (Å <sup>3</sup> )                         | 1336.6(2)                                            | 1336.0(2)                                            | 735.6(2)                                             |
| a (Å)                                            | 11.8081(12)                                          | 11.7641(10)                                          | 7.3830(16)                                           |
| b (Å)                                            | 13.057(10)                                           | 13.1227(12)                                          | 9.1133(11)                                           |
| c (Å)                                            | 8.6690(9)                                            | 8.6544(9)                                            | 11.059(2)                                            |
| α (deg)                                          | 90                                                   | 90                                                   | 90                                                   |
| β (deg)                                          | 90                                                   | 90                                                   | 98.630(16)                                           |
| γ (deg)                                          | 90                                                   | 90                                                   | 90                                                   |
| Z                                                | 4                                                    | 4                                                    | 2                                                    |
| Formula weight (g/mol)                           | 383.80                                               | 386.23                                               | 384.67                                               |
| Density (calcd) (g/cm <sup>3</sup> )             | 1.907                                                | 1.920                                                | 1.737                                                |
| Absorption coefficient (mm <sup>-1</sup> )       | 5.568                                                | 5.900                                                | 3.974                                                |
| F(000)                                           | 710.0                                                | 744.0                                                | 376.0                                                |
| Temp (K)                                         | 150                                                  | 150                                                  | 150                                                  |
| diffractometer                                   | Bruker APEX-II CCD                                   | Bruker APEX-II CCD                                   | Stoe Stadivari                                       |
| Radiation                                        | MoKα (λ = 0.71073)                                   | MoKα (λ = 0.71073)                                   | Mo Kα (λ = 0.71073)                                  |
| 2θ range for data collection (deg)               | 5.64 to 63.14                                        | 5.638 to 52.042                                      | 5.82 to 52.008                                       |
| Absorption correction                            | Multi-scan                                           | Multi-scan                                           | Multi-scan                                           |
| Total no. reflections                            | 12046                                                | 18294                                                | 9911                                                 |
| Unique reflections [R <sub>int</sub> ]           | 2315 [R <sub>int</sub> = 0.0701]                     | 1376 [R <sub>int</sub> = 0.1726]                     | 1448 [R <sub>int</sub> = 0.1487]                     |
| Final R indices [I>2σ(I)]                        | R <sub>1</sub> = 0.0384, wR <sub>2</sub> =<br>0.0776 | R <sub>1</sub> = 0.0379, wR <sub>2</sub> =<br>0.0640 | R <sub>1</sub> = 0.0959, wR <sub>2</sub> =<br>0.2434 |
| R indices (all data)                             | R <sub>1</sub> = 0.0550, wR <sub>2</sub> =<br>0.0844 | R <sub>1</sub> = 0.0615, wR <sub>2</sub> =<br>0.0677 | R <sub>1</sub> = 0.1172, wR <sub>2</sub> =<br>0.2613 |
| Largest diff. peak and hole (e.Å <sup>-3</sup> ) | 1.52/-1.68                                           | 1.10/-1.11                                           | 5.14/-2.66                                           |
| Goof                                             | 1.082                                                | 0.842                                                | 1.004                                                |

\**cis:trans* ratio of 18:82

**Table S3:** Main metrics parameters for the 2 (trans and cis isomer). The carbon in trans formation is written in red. a) metrics taken from literature<sup>2</sup>

|                          | Y         |          | La        |           | Ce        |           | Pr        |          | Nd       |          | Sm        |          |
|--------------------------|-----------|----------|-----------|-----------|-----------|-----------|-----------|----------|----------|----------|-----------|----------|
|                          | trans     | cis      | trans     | cis       | trans     | cis       | trans     | cis      | trans    | cis      | trans     | cis      |
| Ln - C(Cnt)              | 2.657(10) | 2.87(2)  | 2.851(16) | 2.93(2)   | 2.750(12) | 2.891(13) | 2.749(15) | 2.89(4)  | 2.79(2)  | 2.84(1)  | 2.687(13) | 2.824(9) |
|                          | 2.827(9)  | 2.58(2)  | 2.931(8)  | 2.944(14) | 2.878(15) | 2.933(8)  | 2.87(2)   | 2.91(2)  | 2.89(2)  | 2.89(1)  | 2.857(9)  | 2.873(6) |
|                          | 2.894(9)  | 2.51(2)  | 2.913(8)  | 2.971(13) | 2.900(15) | 2.942(8)  | 2.87(2)   | 2.93(2)  | 2.91(2)  | 2.92(1)  | 2.879(9)  | 2.892(7) |
|                          | 2.812(9)  | 2.60(2)  | 2.901(8)  | 2.952(13) | 2.887(15) | 2.925(8)  | 2.88(2)   | 2.90(4)  | 2.85(2)  | 2.90(1)  | 2.834(9)  | 2.878(7) |
|                          | 2.692(8)  | 2.81(3)  | 2.873(8)  | 2.927(13) | 2.857(15) | 2.905(8)  | 2.815(16) | 2.85(2)  | 2.81(2)  | 2.86(1)  | 2.763(6)  | 2.831(6) |
|                          | -         | 3.13(3)  | -         | -         | -         | -         | -         | -        | -        | -        | -         | -        |
|                          | -         | 3.53(2)  | -         | -         | -         | -         | -         | -        | -        | -        | -         | -        |
|                          | -         | 3.60(2)  | -         | -         | -         | -         | -         | -        | -        | -        | -         | -        |
| Ln-C(Cot)                | 2.524(7)  | 2.63(2)  | 2.686(4)  | 2.699(11) | 2.640(4)  | 2.689(7)  | 2.637(5)  | 2.67(2)  | 2.619(8) | 2.66(1)  | 2.594(5)  | 2.624(6) |
|                          | 2.554(8)  | 2.46(3)  | 2.693(4)  | 2.694(12) | 2.657(4)  | 2.675(8)  | 2.631(6)  | 2.65(2)  | 2.614(9) | 2.65(1)  | 2.591(6)  | 2.627(7) |
|                          | 2.554(8)  | 2.50(2)  | 2.693(4)  | 2.700(13) | 2.656(4)  | 2.684(8)  | 2.639(6)  | 2.64(2)  | 2.641(9) | 2.64(1)  | 2.601(6)  | 2.629(7) |
|                          | 2.536(7)  | 2.43(2)  | 2.703(4)  | 2.686(13) | 2.664(4)  | 2.657(8)  | 2.637(5)  | 2.64(2)  | 2.629(9) | 2.64(1)  | 2.595(6)  | 2.618(6) |
|                          | -         | 2.54(2)  | -         | -         | -         | -         | -         | -        | -        | -        | -         | -        |
|                          | -         | 2.61(2)  | -         | -         | -         | -         | -         | -        | -        | -        | -         | -        |
|                          | -         | 2.48(3)  | -         | -         | -         | -         | -         | -        | -        | -        | -         | -        |
|                          | -         | 2.65(2)  | -         | -         | -         | -         | -         | -        | -        | -        | -         | -        |
| Plane (Cot) ^Plane (Cnt) | -         | 21.26 °  | -         | 3.69 °    | -         | 3.75 °    | -         | 3.86 °   | -        | 3.62 °   | -         | 3.02 °   |
| Cent-Cot - Ln - Cent-Cnt | -         | 170.67 ° | -         | 176.86 °  | -         | 177.01 °  | -         | 177.39 ° | -        | 176.70 ° | -         | 177.17 ° |
| Ln-C(Cot) average        | 2.542(8)  | 2.54(2)  | 2.694(4)  | 2.695(12) | 2.654(4)  | 2.676(8)  | 2.636(6)  | 2.65(1)  | 2.625(9) | 2.65(1)  | 2.595(6)  | 2.624(7) |
| Ln-C(Cnt-C8) average     | 2.806(9)  | -        | 2.905(8)  | -         | 2.881(15) | -         | 2.86(2)   | -        | 2.87(2)  | -        | 2.833(8)  | -        |
| Ln-C(Cnt) average        | 2.776(9)  | 2.75(2)  | 2.894(10) | 2.944(15) | 2.85(1)   | 2.91(1)   | 2.84(2)   | 2.90(2)  | 2.85(2)  | 2.88(1)  | 2.804(9)  | 2.860(7) |

|                          | Gd          |           | Tb        |                  | Dy        |                  | Ho        |                  | Er               | Tm               | Lu               |
|--------------------------|-------------|-----------|-----------|------------------|-----------|------------------|-----------|------------------|------------------|------------------|------------------|
|                          | trans       | cis       | trans     | cis <sup>a</sup> | trans     | cis <sup>a</sup> | trans     | cis <sup>a</sup> | cis <sup>a</sup> | cis <sup>a</sup> | cis <sup>a</sup> |
| Ln - C(Cnt)              | 2.703(17)   | 2.77(3)   | 2.664(16) | 2.78(2)          | 2.660(9)  | 2.675(17)        | 2.673(11) | 2.56(2)          | 2.55(3)          | 2.54(3)          | 2.50(2)          |
|                          | 2.853((10)) | 2.817(18) | 2.837(12) | 2.839(16)        | 2.825(9)  | 2.723(16)        | 2.819(9)  | 2.61(2)          | 2.59(3)          | 2.57(2)          | 2.54(2)          |
|                          | 2.872(9)    | 2.873(19) | 2.885(12) | 2.874(15)        | 2.858(9)  | 2.738(16)        | 2.86(1)   | 2.821(16)        | 2.61(3)          | 2.64(2)          | 2.6(2)           |
|                          | 2.828(10)   | 2.861(19) | 2.828(12) | 2.852(16)        | 2.806(6)  | 2.787(15)        | 2.805(8)  | 3.212(14)        | 2.881(16)        | 2.73(2)          | 2.68(2)          |
|                          | 2.749(9)    | 2.801(17) | 2.722(10) | 2.780(14)        | 2.720(6)  | 2.860(18)        | 2.684(7)  | 3.466(17)        | 3.443(13)        | 2.875(13)        | 2.943(12)        |
|                          | -           | -         | -         | -                | -         | 2.953(18)        | -         | 3.37(2)          | 3.763(13)        | 3.11(2)          | 3.14(2)          |
|                          | -           | -         | -         | -                | -         | 2.959(17)        | -         | 3.02(3)          | 3.597(15)        | 3.449(9)         | 3.59(10)         |
|                          | -           | -         | -         | -                | -         | 2.857(16)        | -         | 2.72(3)          | 3.10( 2)         | 3.594(12)        | 3.719(13)        |
|                          | -           | -         | -         | -                | 2.736(16) | -                | 2.62(2)   | 2.69(3)          | 3.769(8)         | 3.930(9)         |                  |
| Ln-C(Cot)                | 2.559(7)    | 2.607(15) | 2.537(9)  | 2.573(14)        | 2.534(5)  | 2.52(2)          | 2.518(7)  | 2.493(15)        | 2.470(13)        | 2.467(8)         | 2.461(10)        |
|                          | 2.575(7)    | 2.630(17) | 2.563(11) | 2.591(16)        | 2.544(5)  | 2.560(16)        | 2.529(8)  | 2.519(14)        | 2.499(15)        | 2.479(12)        | 2.457(12)        |
|                          | 2.582(6)    | 2.613(17) | 2.566(9)  | 2.586(14)        | 2.543(5)  | 2.611(16)        | 2.524(7)  | 2.580(16)        | 2.50(12)         | 2.46(2)          | 2.465(17)        |
|                          | 2.565(7)    | 2.586(15) | 2.540(9)  | 2.573(13)        | 2.544(5)  | 2.639(16)        | 2.534(6)  | 2.652(18)        | 2.55(3)          | 2.54(3)          | 2.495(19)        |
|                          | -           | -         | -         | -                | -         | 2.600(16)        | -         | 2.61(2)          | 2.51(3)          | 2.50(3)          | 2.45(2)          |
|                          | -           | -         | -         | -                | -         | 2.615(15)        | -         | 2.55(3)          | 2.52(3)          | 2.43(3)          | 2.44(2)          |
|                          | -           | -         | -         | -                | -         | 2.590(15)        | -         | 2.47(4)          | 2.45(3)          | 2.45(2)          | 2.47(2)          |
|                          | -           | -         | -         | -                | -         | 2.536(17)        | -         | 2.464(19)        | 2.448(16)        | 2.456(12)        | 2.468(13)        |
| Plane (Cot) ^Plane (Cnt) | -           | 2.53 °    | -         | 4.80 °           | -         | 12.5 °           | -         | 26.7 °           | 29.7 °           | 31.3 °           | 34.2 °           |
| Cent-Cot - Ln - Cent-Cnt | -           | 177.34 °  | -         | 177.4 °          | -         | 172.0 °          | -         | 169.6 °          | 174.7 °          | 173.8 °          | 174.2 °          |
| Ln-C(Cot) average        | 2.570(7)    | 2.609(16) | 2.552(10) | 2.58(2)          | 2.541(5)  | 2.58(4)          | 2.478(7)  | 2.55(7)          | 2.50(4)          | 22.48(3)         | 2.46(1)          |
| Ln-C(Cnt-C8) average     | 2.826(9)    | -         | 2.818(11) | -                | 2.802(8)  | -                | 2.792(9)  | -                | -                | -                | -                |
| Ln-C(Cnt) average        | 2.801(11)   | 2.82(2)   | 2.787(13) | 2.82(3)          | 2.774(8)  | 2.81(10)         | 2.768(9)  | 2.93(33)         | 2.74(21)         | 2.74(21)         | 2.73(26)         |



**Table S4:** Main metrics for the 2-Ln-trans. The carbon in trans formation is written in red.

|                      | Y         | La        | Ce        | Pr        | Nd       | Sm        | Gd        | Tb        | Dy       | Ho        |
|----------------------|-----------|-----------|-----------|-----------|----------|-----------|-----------|-----------|----------|-----------|
|                      | trans     | trans     | trans     | trans     | trans    | trans     | trans     | trans     | trans    | trans     |
| Ln - C(Cnt)          | 2.657(10) | 2.851(16) | 2.750(12) | 2.749(15) | 2.79(2)  | 2.687(13) | 2.703(17) | 2.664(16) | 2.660(9) | 2.673(11) |
|                      | 2.827(9)  | 2.931(8)  | 2.878(15) | 2.87(2)   | 2.89(2)  | 2.857(9)  | 2.853(10) | 2.837(12) | 2.825(9) | 2.819(9)  |
|                      | 2.894(9)  | 2.913(8)  | 2.900(15) | 2.87(2)   | 2.91(2)  | 2.879(9)  | 2.872(9)  | 2.885(12) | 2.858(9) | 2.86(1)   |
|                      | 2.812(9)  | 2.901(8)  | 2.887(15) | 2.88(2)   | 2.85(2)  | 2.834(9)  | 2.828(10) | 2.828(12) | 2.806(6) | 2.805(8)  |
|                      | 2.692(8)  | 2.873(8)  | 2.857(15) | 2.815(16) | 2.81(2)  | 2.763(6)  | 2.749(9)  | 2.722(10) | 2.720(6) | 2.684(7)  |
| Ln-C(Cot)            | 2.524(7)  | 2.686(4)  | 2.640(4)  | 2.637(5)  | 2.619(8) | 2.594(5)  | 2.559(7)  | 2.537(9)  | 2.534(5) | 2.518(7)  |
|                      | 2.554(8)  | 2.693(4)  | 2.657(4)  | 2.631(6)  | 2.614(9) | 2.591(6)  | 2.575(7)  | 2.563(11) | 2.544(5) | 2.529(8)  |
|                      | 2.554(8)  | 2.693(4)  | 2.656(4)  | 2.639(6)  | 2.641(9) | 2.601(6)  | 2.582(6)  | 2.566(9)  | 2.543(5) | 2.524(7)  |
|                      | 2.536(7)  | 2.703(4)  | 2.664(4)  | 2.637(5)  | 2.629(9) | 2.595(6)  | 2.565(7)  | 2.540(9)  | 2.544(5) | 2.534(6)  |
| Ln-C(Cot) average    | 2.542(8)  | 2.694(4)  | 2.654(4)  | 2.636(6)  | 2.625(9) | 2.595(6)  | 2.570(7)  | 2.552(10) | 2.541(5) | 2.478(7)  |
| Ln-C(Cnt-C8) average | 2.806(9)  | 2.905(8)  | 2.881(15) | 2.86(2)   | 2.87(2)  | 2.833(8)  | 2.826(9)  | 2.818(11) | 2.802(8) | 2.792(9)  |
| Ln-C(Cnt)all average | 2.776(9)  | 2.894(10) | 2.85(1)   | 2.84(2)   | 2.85(2)  | 2.804(9)  | 2.801(11) | 2.787(13) | 2.774(8) | 2.768(9)  |

**Table S5:** Main metrics for the 2-Ln-cis. a) Metrics taken from known literature

|                          | Y        | La        | Ce        | Pr       | Nd       | Sm       | Gd        | Tb               | Dy               | Ho               | Er               | Tm               | Lu               |
|--------------------------|----------|-----------|-----------|----------|----------|----------|-----------|------------------|------------------|------------------|------------------|------------------|------------------|
|                          | cis      | cis       | cis       | cis      | cis      | cis      | cis       | cis <sup>a</sup> | cis <sup>a</sup> | cis <sup>a</sup> | cis <sup>a</sup> | cis <sup>a</sup> | cis <sup>a</sup> |
| Ln - C(Cnt)              | 2.87(2)  | 2.93(2)   | 2.891(13) | 2.89(4)  | 2.84(1)  | 2.824(9) | 2.77(3)   | 2.78(2)          | 2.675(17)        | 2.56(2)          | 2.55(3)          | 2.54(3)          | 2.50(2)          |
|                          | 2.58(2)  | 2.944(14) | 2.933(8)  | 2.91(2)  | 2.89(1)  | 2.873(6) | 2.817(18) | 2.839(16)        | 2.723(16)        | 2.61(2)          | 2.59(3)          | 2.57(2)          | 2.54(2)          |
|                          | 2.51(2)  | 2.971(13) | 2.942(8)  | 2.93(2)  | 2.92(1)  | 2.892(7) | 2.873(19) | 2.874(15)        | 2.738(16)        | 2.821(16)        | 2.61(3)          | 2.64(2)          | 2.6(2)           |
|                          | 2.60(2)  | 2.952(13) | 2.925(8)  | 2.90(4)  | 2.90(1)  | 2.878(7) | 2.861(19) | 2.852(16)        | 2.787(15)        | 3.212(14)        | 2.881(16)        | 2.73(2)          | 2.68(2)          |
|                          | 2.81(3)  | 2.927(13) | 2.905(8)  | 2.85(2)  | 2.86(1)  | 2.831(6) | 2.801(17) | 2.780(14)        | 2.860(18)        | 3.466(17)        | 3.443(13)        | 2.875(13)        | 2.943(12)        |
|                          | 3.13(3)  | -         | -         | -        | -        | -        | -         | -                | 2.953(18)        | 3.37(2)          | 3.763(13)        | 3.11(2)          | 3.14(2)          |
|                          | 3.53(2)  | -         | -         | -        | -        | -        | -         | -                | 2.959(17)        | 3.02(3)          | 3.597(15)        | 3.449(9)         | 3.59(10)         |
|                          | 3.60(2)  | -         | -         | -        | -        | -        | -         | -                | 2.857(16)        | 2.72(3)          | 3.10(2)          | 3.594(12)        | 3.719(13)        |
|                          | 3.30(2)  | -         | -         | -        | -        | -        | -         | -                | 2.736(16)        | 2.62(2)          | 2.69(3)          | 3.769(8)         | 3.930(9)         |
| Ln-C(Cot)                | 2.63(2)  | 2.699(11) | 2.689(7)  | 2.67(2)  | 2.66(1)  | 2.624(6) | 2.607(15) | 2.573(14)        | 2.52(2)          | 2.493(15)        | 2.470(13)        | 2.467(8)         | 2.461(10)        |
|                          | 2.46(3)  | 2.694(12) | 2.675(8)  | 2.65(2)  | 2.65(1)  | 2.627(7) | 2.630(17) | 2.591(16)        | 2.560(16)        | 2.519(14)        | 2.499(15)        | 2.479(12)        | 2.457(12)        |
|                          | 2.50(2)  | 2.700(13) | 2.684(8)  | 2.64(2)  | 2.64(1)  | 2.629(7) | 2.613(17) | 2.586(14)        | 2.611(16)        | 2.580(16)        | 2.50(12)         | 2.46(2)          | 2.465(17)        |
|                          | 2.43(2)  | 2.686(13) | 2.657(8)  | 2.64(2)  | 2.64(1)  | 2.618(6) | 2.586(15) | 2.573(13)        | 2.639(16)        | 2.652(18)        | 2.55(3)          | 2.54(3)          | 2.495(19)        |
|                          | 2.54(2)  | -         | -         | -        | -        | -        | -         | -                | 2.600(16)        | 2.61(2)          | 2.51(3)          | 2.50(3)          | 2.45(2)          |
|                          | 2.61(2)  | -         | -         | -        | -        | -        | -         | -                | 2.615(15)        | 2.55(3)          | 2.52(3)          | 2.43(3)          | 2.44(2)          |
|                          | 2.48(3)  | -         | -         | -        | -        | -        | -         | -                | 2.590(15)        | 2.47(4)          | 2.45(3)          | 2.45(2)          | 2.47(2)          |
|                          | 2.65(2)  | -         | -         | -        | -        | -        | -         | -                | 2.536(17)        | 2.464(19)        | 2.448(16)        | 2.456(12)        | 2.468(13)        |
| Plane (Cot) ^Plane (Cnt) | 21.26 °  | 3.69 °    | 3.75°     | 3.86 °   | 3.62 °   | 3.02 °   | 2.53 °    | 4.80 °           | 12.5 °           | 26.7 °           | 29.7 °           | 31.3 °           | 34.2 °           |
| Cent-Cot - Ln - Cent-Cnt | 170.67 ° | 176.86 °  | 177.01 °  | 177.39 ° | 176.70 ° | 177.17 ° | 177.34 °  | 177.4 °          | 172.0 °          | 169.6 °          | 174.7 °          | 173.8 °          | 174.2 °          |
| Ln-C(Cot) average        | 2.54(2)  | 2.695(12) | 2.676(8)  | 2.65(1)  | 2.65(1)  | 2.624(7) | 2.609(16) | 2.58(2)          | 2.58(4)          | 2.55(7)          | 2.50(4)          | 22.48(3)         | 2.46(1)          |
| Ln-C(Cnt) average        | 2.75(2)  | 2.944(15) | 2.91(1)   | 2.90(2)  | 2.88(1)  | 2.860(7) | 2.82(2)   | 2.82(3)          | 2.81(10)         | 2.93(33)         | 2.74(21)         | 2.74(21)         | 2.73(26)         |

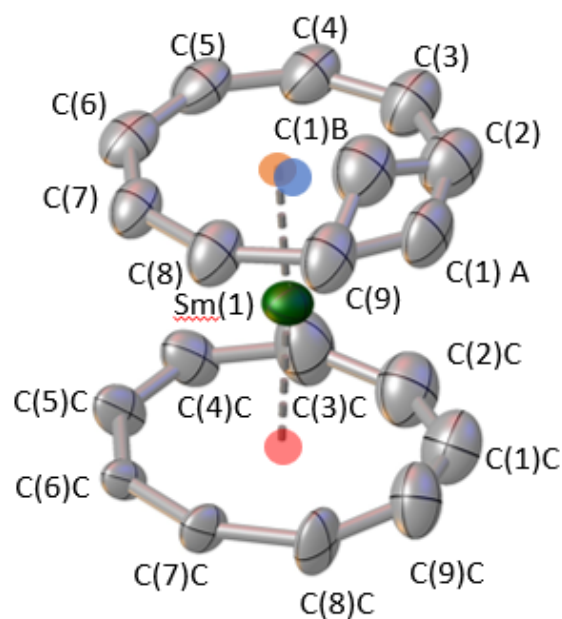

18% *trans*

Figure S27: Molecular structure of *1-trans* (18% *trans* ratio)

Table S6: Summary of bond length and angles from the ligands to the metal center in **1**.

|                                                    | Main distances in Å |
|----------------------------------------------------|---------------------|
| Sm-C1C(Cnt)                                        | 2.83(4)             |
| Sm – C2 (Cnt)                                      | 2.89(4)             |
| Sm – C3 (Cnt)                                      | 2.92(3)             |
| Sm – C4 (Cnt)                                      | 2.77(6)             |
| Sm – C5 (Cnt)                                      | 2.90(4)             |
| Sm– C6 (Cnt)                                       | 2.92(3)             |
| Sm – C7 (Cnt)                                      | 2.95(2)             |
| Sm – C8 (Cnt)                                      | 2.92(3)             |
| Sm – C9 (Cnt)                                      | 2.92(4)             |
| <b>Sm – Cent (Cnt cis)</b>                         | <b>2.058 (12)</b>   |
| Sm – C1A (Cnt)                                     | 2.85(5)             |
| Sm-C1B(Cnt)                                        | 2.72(7)             |
| Sm – C2 (Cnt)                                      | 2.81(3)             |
| Sm – C3 (Cnt)                                      | 2.83(3)             |
| Sm – C4 (Cnt)                                      | 2.82(3)             |
| Sm – C5 (Cnt)                                      | 2.82(3)             |
| Sm– C6 (Cnt)                                       | 2.85(3)             |
| Sm – C7 (Cnt)                                      | 2.84(3)             |
| Sm – C8 (Cnt)                                      | 2.87(3)             |
| Sm – C9 (Cnt)                                      | 2.87(4)             |
| <b>Sm – Cent (Cnt)</b>                             | <b>2,075 (13)</b>   |
| <b>Sm – Cent (Cnt) –9C cis</b>                     | <b>2,022 (9)</b>    |
| Plane (Cnt cis) ^Plane (Cnt trans)                 | 2,7                 |
| Cent-Cntcis -Sm- Cent-Cnttrans                     | 176,2               |
| Plane (C2/C1/C2 <sup>1</sup> ) ^Plane (Cnt 9C cis) | 48                  |

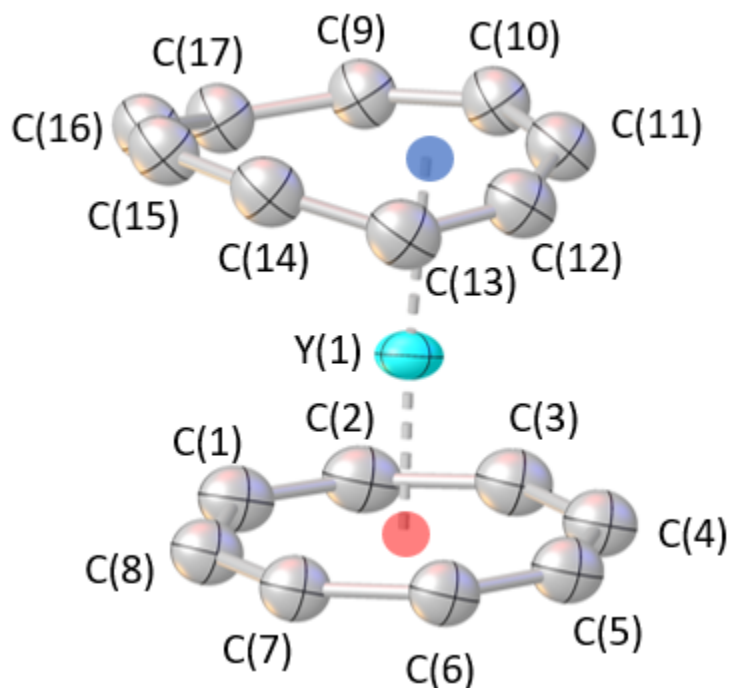

Figure S28: Molecular structure of 2-Y-cis

Table S7: Summary of bond length and angles from the ligands to the metal center.<sup>1</sup> Only the C coordinated to the metal are taken into account.

|                                             | Main distances in Å |
|---------------------------------------------|---------------------|
| Y(1) – C(1) (Cot)                           | 2.63(2)             |
| Y(1) – C(2) (Cot)                           | 2.46(3)             |
| Y(1) – C(3) (Cot)                           | 2.50(2)             |
| Y(1) – C(4) (Cot)                           | 2.43(2)             |
| Y(1) – C(5) (Cot)                           | 2.54(2)             |
| Y(1) – C(6) (Cot)                           | 2.61(2)             |
| Y(1) – C(7) (Cot)                           | 2.48(3)             |
| Y(1) – C(8) (Cot)                           | 2.65(2)             |
| <b>Y(1) – Cent (Cot)</b>                    | <b>1.734(9)</b>     |
| Y(1) – C(9) (Cnt)                           | 2.87(2)             |
| Y(1) – C(10) (Cnt)                          | 2.58(2)             |
| Y(1) – C(11) (Cnt)                          | 2.51(2)             |
| Y(1) – C(12) (Cnt)                          | 2.60(2)             |
| Y(1) – C(13) (Cnt)                          | 2.81(3)             |
| Y(1) – C(14) (Cnt)                          | 3.13(3)             |
| Y(1) – C(15) (Cnt)                          | 3.53(2)             |
| Y(1) – C(16) (Cnt)                          | 3.60(2)             |
| Y(1) – C(17) (Cnt)                          | 3.30(2)             |
| <b>Y(1) – Cent (Cnt)<sup>1</sup></b>        | <b>2.081(11)</b>    |
| Plane (Cot) ^Plane (Cnt) <sup>1</sup>       | 21.26 °             |
| Cent (Cot) - Y(1) – Cent (Cnt) <sup>1</sup> | 170.67 °            |

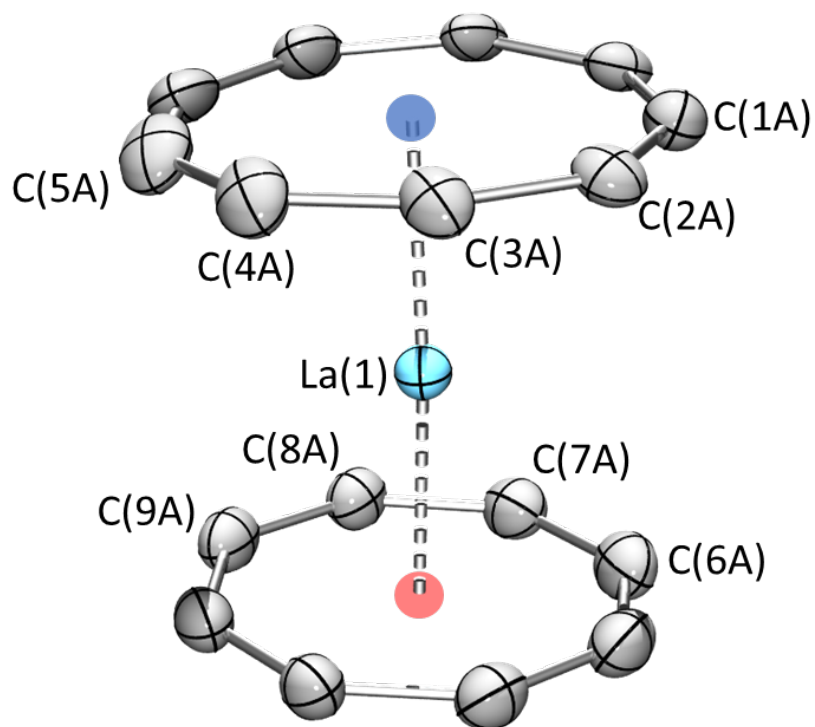

Figure S29: Molecular structure of 2-La-cis

Table S8: Summary of bond length and angles from the ligands to the metal center.

|                                 | Main distances in Å |
|---------------------------------|---------------------|
| La(1) – C(6A) (Cot)             | 2.699(11)           |
| La(1) – C(7A) (Cot)             | 2.694(12)           |
| La(1) – C(8A) (Cot)             | 2.700(13)           |
| La(1) – C(9A) (Cot)             | 2.686(13)           |
| La(1) – Cent (Cot)              | 1.98                |
| La(1) – C(1A) (Cnt)             | 2.93(2)             |
| La(1) – C(2A) (Cnt)             | 2.944(14)           |
| La(1) – C(3A) (Cnt)             | 2.971(13)           |
| La(1) – C(4A) (Cnt)             | 2.952(13)           |
| La(1) – C(5A) (Cnt)             | 2.927(13)           |
| La(1) – Cent (Cnt)              | 2.14                |
| Plane (Cot) ^Plane (Cnt)        | 3.69 °              |
| Cent (Cot) - La(1) – Cent (Cnt) | 176.86 °            |

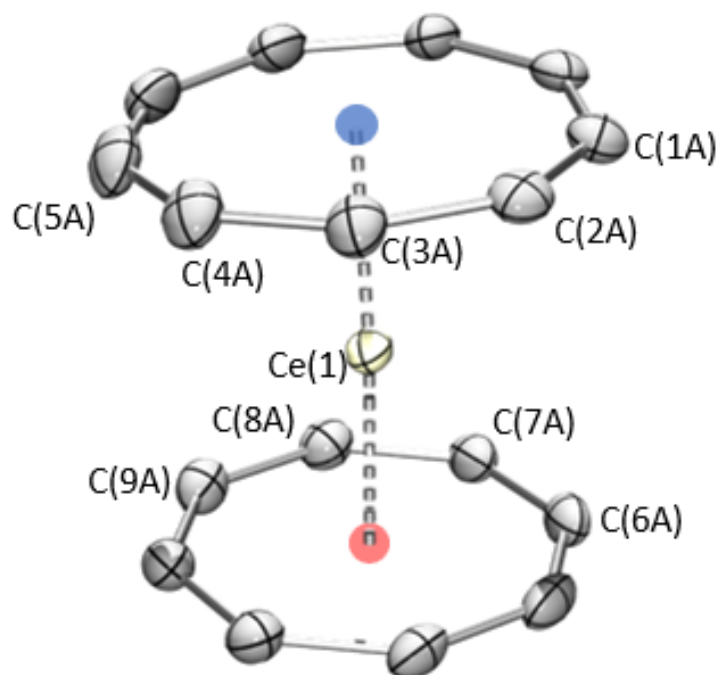

Figure S 30: Molecular structure of 2-Ce-cis

**Table S9:** Summary of bond length and angles from the ligands to the metal center.

|                                 | Main distances in Å |
|---------------------------------|---------------------|
| Ce(1) – C(6A) (Cot)             | 2.689(7)            |
| Ce(1) – C(7A) (Cot)             | 2.675(8)            |
| Ce(1) – C(8A) (Cot)             | 2.684(8)            |
| Ce(1) – C(9A) (Cot)             | 2.657(8)            |
| <b>Ce(1) – Cent (Cot)</b>       | <b>1.947</b>        |
| Ce(1) – C(1A) (Cnt)             | 2.891(13)           |
| Ce(1) – C(2A) (Cnt)             | 2.933(8)            |
| Ce(1) – C(3A) (Cnt)             | 2.942(8)            |
| Ce(1) – C(4A) (Cnt)             | 2.925(8)            |
| Ce(1) – C(5A) (Cnt)             | 2.905(8)            |
| <b>Ce(1) – Cent (Cnt)</b>       | <b>2.095</b>        |
| Plane (Cot) ^Plane (Cnt)        | 3.75°               |
| Cent (Cot) - Ce(1) – Cent (Cnt) | 177.01°             |

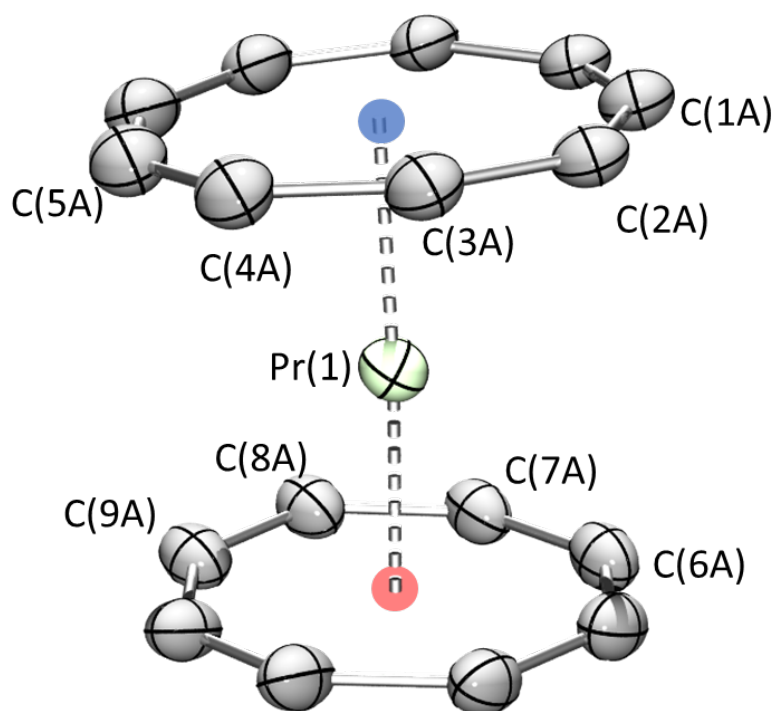

Figure S31: Molecular structure of 2-Pr-cis

Table S10: Summary of bond length and angles from the ligands to the metal center.

|                             | Main distances in Å |
|-----------------------------|---------------------|
| Pr(1) – C(6A) (Cot)         | 2.67(2)             |
| Pr(1) – C(7A) (Cot)         | 2.65(2)             |
| Pr(1) – C(8A) (Cot)         | 2.64(2)             |
| Pr(1) – C(9A) (Cot)         | 2.64(2)             |
| <b>Pr(1) – Cent (Cot)</b>   | <b>1.91</b>         |
| Pr(1) – C(1A) (Cnt)         | 2.89(4)             |
| Pr(1) – C(2A) (Cnt)         | 2.91(2)             |
| Pr(1) – C(3A) (Cnt)         | 2.93(2)             |
| Pr(1) – C(4A) (Cnt)         | 2.90(4)             |
| Pr(1) – C(5A) (Cnt)         | 2.85(2)             |
| <b>Pr(1) – Cent (Cnt)</b>   | <b>2.07</b>         |
| Plane (Cot) ^Plane (Cnt)    | 3.86 °              |
| Cent-Cot - Pr(1) - Cent-Cnt | 177.39 °            |

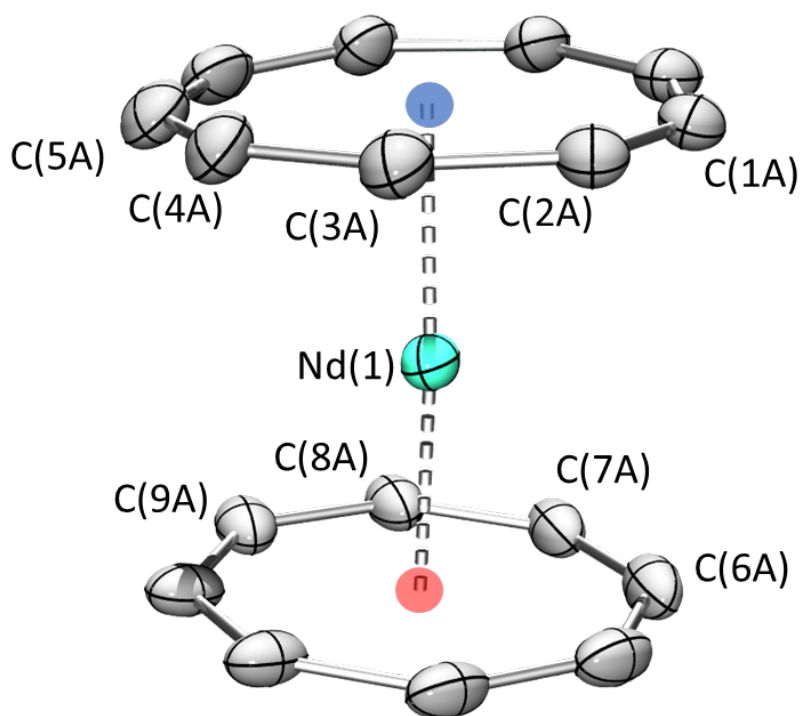

Figure S32: Molecular structure of 2-Nd-cis

Table S11: Summary of bond length and angles from the ligands to the metal center.

|                             | Main distances in Å |
|-----------------------------|---------------------|
| Nd(1) – C(6A) (Cot)         | 2.66(1)             |
| Nd(1) – C(7A) (Cot)         | 2.65(1)             |
| Nd(1) – C(8A) (Cot)         | 2.64(1)             |
| Nd(1) – C(9A) (Cot)         | 2.64(1)             |
| <b>Nd(1) – Cent (Cot)</b>   | <b>1.90</b>         |
| Nd(1) – C(1A) (Cnt)         | 2.84(1)             |
| Nd(1) – C(2A) (Cnt)         | 2.89(1)             |
| Nd(1) – C(3A) (Cnt)         | 2.92(1)             |
| Nd(1) – C(4A) (Cnt)         | 2.90(1)             |
| Nd(1) – C(5A) (Cnt)         | 2.86(1)             |
| <b>Nd(1) – Cent (Cnt)</b>   | <b>2.05</b>         |
| Plane (Cot) ^Plane (Cnt)    | 3.62 °              |
| Cent-Cot - Nd(1) - Cent-Cnt | 176.70 °            |



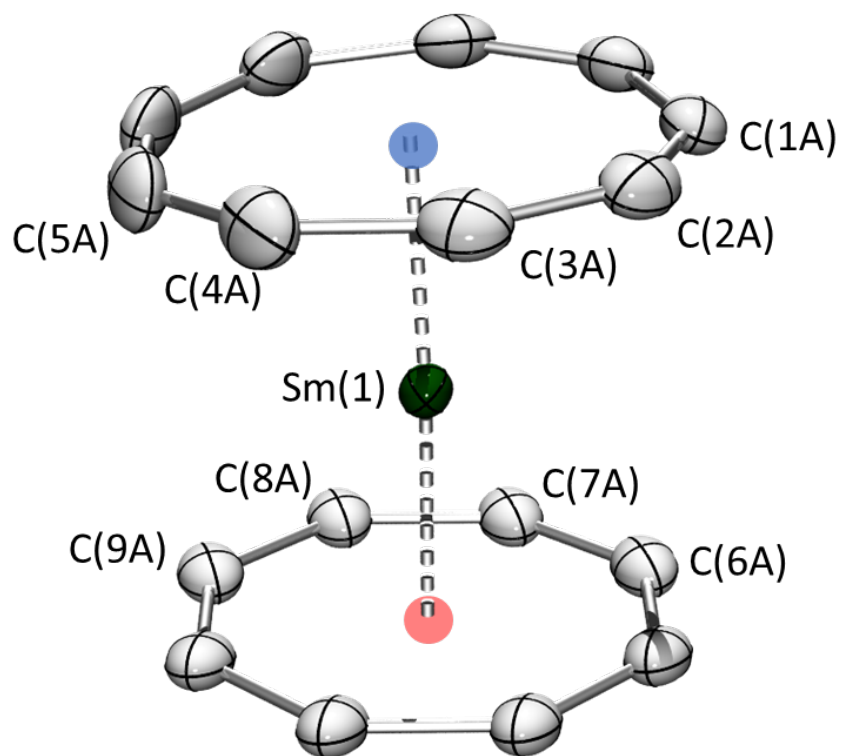

Figure S33: Molecular structure of 2-Sm-cis

Table S12: Summary of bond length and angles from the ligands to the metal center.

|                             | Main distances in Å |
|-----------------------------|---------------------|
| Sm(1) – C(6A) (Cot)         | 2.624(6)            |
| Sm(1) – C(7A) (Cot)         | 2.627(7)            |
| Sm(1) – C(8A) (Cot)         | 2.629(7)            |
| Sm(1) – C(9A) (Cot)         | 2.618(6)            |
| <b>Sm(1) – Cent (Cot)</b>   | <b>1.87</b>         |
| Sm(1) – C(1A) (Cnt)         | 2.824(9)            |
| Sm(1) – C(2A) (Cnt)         | 2.873(6)            |
| Sm(1) – C(3A) (Cnt)         | 2.892(7)            |
| Sm(1) – C(4A) (Cnt)         | 2.878(7)            |
| Sm(1) – C(5A) (Cnt)         | 2.831(6)            |
| <b>Sm(1) – Cent (Cnt)</b>   | <b>2.01</b>         |
| Plane (Cot) ^Plane (Cnt)    | 3.02 °              |
| Cent-Cot - Sm(1) - Cent-Cnt | 177.17 °            |

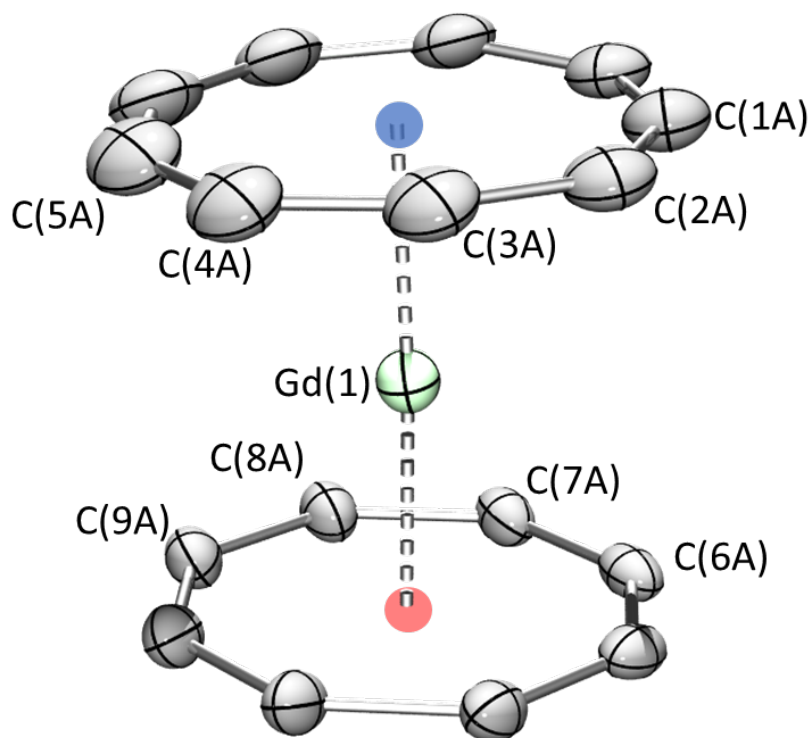

Figure S34: Molecular structure of 2-Gd-cis

Table S13: Summary of bond length and angles from the ligands to the metal center.

|                             | Main distances in Å |
|-----------------------------|---------------------|
| Gd(1) – C(6A) (Cot)         | 2.607(15)           |
| Gd(1) – C(7A) (Cot)         | 2.630(17)           |
| Gd(1) – C(8A) (Cot)         | 2.613(17)           |
| Gd(1) – C(9A) (Cot)         | 2.586(15)           |
| <b>Gd(1) – Cent (Cot)</b>   | <b>1.83</b>         |
| Gd(1) – C(1A) (Cnt)         | 2.77(3)             |
| Gd(1) – C(2A) (Cnt)         | 2.817(18)           |
| Gd(1) – C(3A) (Cnt)         | 2.873(19)           |
| Gd(1) – C(4A) (Cnt)         | 2.861(19)           |
| Gd(1) – C(5A) (Cnt)         | 2.801(17)           |
| <b>Gd(1) – Cent (Cnt)</b>   | <b>2.00</b>         |
| Plane (Cot) ^Plane (Cnt)    | 2.53 °              |
| Cent-Cot - Gd(1) - Cent-Cnt | 177.34 °            |

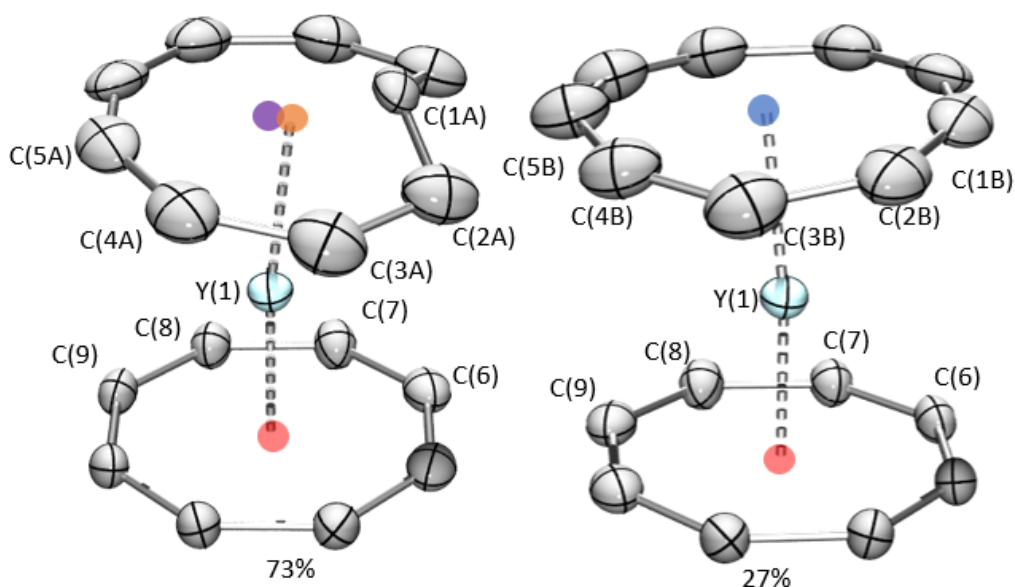

Figure S35: Molecular structure of 2-Y-trans (73% ratio).

Table S14: Summary of bond length and angles from the ligands to the metal center.

|                                                      | Main distances in Å |
|------------------------------------------------------|---------------------|
| Y(1) – C(6) (Cot)                                    | 2.524(7)            |
| Y(1) – C(7) (Cot)                                    | 2.554(8)            |
| Y(1) – C(8) (Cot)                                    | 2.554(8)            |
| Y(1) – C(9) (Cot)                                    | 2.536(7)            |
| Y(1) – Cent (Cot)                                    | 1.758(4)            |
| Y(1) – C(1A) (Cnt)                                   | 2.657(10)           |
| Y(1) – C(1B) (Cnt)                                   | 2.66(6)             |
| Y(1) – C(2A) (Cnt)                                   | 2.827(9)            |
| Y(1) – C(2B) (Cnt)                                   | 2.83(3)             |
| Y(1) – C(3A) (Cnt)                                   | 2.894(9)            |
| Y(1) – C(3B) (Cnt)                                   | 2.93(2)             |
| Y(1) – C(4A) (Cnt)                                   | 2.812(9)            |
| Y(1) – C(4B) (Cnt)                                   | 3.00(2)             |
| Y(1) – C(5A) (Cnt)                                   | 2.692(8)            |
| Y(1) – C(5B) (Cnt)                                   | 2.85(2)             |
| Y(1) – Cent (Cnt <sup>trans</sup> )                  | 1.995(4)            |
| Y(1) – Cent (Cnt <sup>cis</sup> )                    | 2.050(13)           |
| Y(1) – Cent (Cnt-8C)                                 | 1.948(5)            |
| Plane (Cot) ^Plane (Cnt <sup>cis</sup> )             | 1.4 °               |
| Plane (Cot) ^Plane (Cnt-8C)                          | 4.3 °               |
| Cent (Cot) - Y(1) – Cent (Cnt <sup>trans</sup> )     | 176.7 °             |
| Cent (Cot) - Y(1) - Cent (Cnt <sup>cis</sup> )       | 175.9 °             |
| Cent (Cot) - Y(1) - Cent (Cnt-8C)                    | 179.1 °             |
| Plane (C(2)/C(1)/C(2')) ^Plane (Cnt <sup>cis</sup> ) | 47.9 °              |

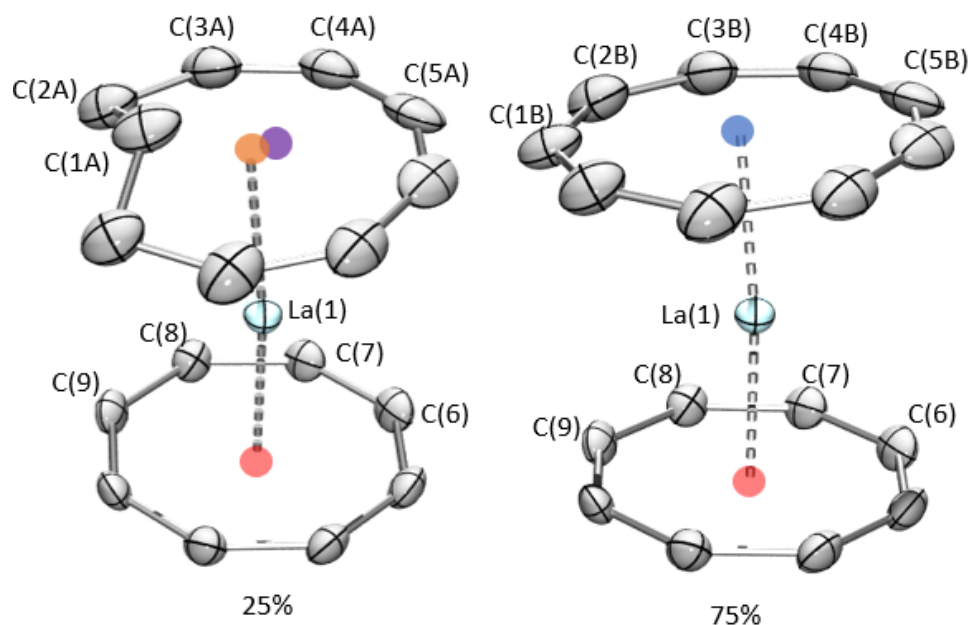

Figure S36: Molecular structure of 2-La-trans (25% ratio).

Table S15: Summary of bond length and angles from the ligands to the metal center.

|                                                      | Main distances in Å |
|------------------------------------------------------|---------------------|
| La(1) – C(6) (Cot)                                   | 2.686(4)            |
| La(1) – C(7) (Cot)                                   | 2.693(4)            |
| La(1) – C(8) (Cot)                                   | 2.693(4)            |
| La(1) – C(9) (Cot)                                   | 2.703(4)            |
| La(1) – Cent (Cot)                                   | 1.970(2)            |
| La(1) – C(1A) (Cnt)                                  | 2.851 (16)          |
| La(1) – C(1B) (Cnt)                                  | 2.897(11)           |
| La(1) – C(2A) (Cnt)                                  | 2.931(8)            |
| La(1) – C(2B) (Cnt)                                  | 2.947(7)            |
| La(1) – C(3A) (Cnt)                                  | 2.913(8)            |
| La(1) – C(3B) (Cnt)                                  | 2.965(7)            |
| La(1) – C(4A) (Cnt)                                  | 2.901(8)            |
| La(1) – C(4B) (Cnt)                                  | 2.952(7)            |
| La(1) – C(5A) (Cnt)                                  | 2.873(8)            |
| La(1) – C(5B) (Cnt)                                  | 2.951(7)            |
| La(1) – Cent (Cnt <sup>trans</sup> )                 | 2.157(4)            |
| La(1) – Cent (Cnt <sup>cis</sup> )                   | 2.138(3)            |
| La(1) – Cent (Cnt-8C)                                | 2.110(4)            |
| Plane (Cot) ^Plane (Cnt <sup>cis</sup> )             | 3.66 °              |
| Plane (Cot) ^Plane (Cnt-8C)                          | 5.03 °              |
| Cent (Cot) - La(1) - Cent (Cnt <sup>trans</sup> )    | 177.13 °            |
| Cent (Cot) - La(1) - Cent (Cnt <sup>cis</sup> )      | 176.25 °            |
| Cent (Cot) - La(1) - Cent (Cnt-8C)                   | 178.76 °            |
| Plane (C(2)/C(1)/C(2')) ^Plane (Cnt <sup>cis</sup> ) | 32.4 °              |

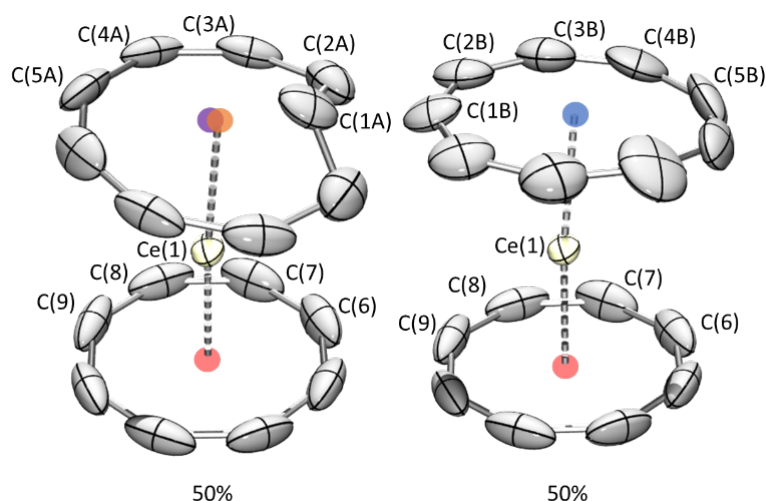

Figure S37: Molecular structure of 2-Ce-trans (50% ratio).

Table S16: Summary of bond length and angles from the ligands to the metal center.

|                                          | Main distances in Å |
|------------------------------------------|---------------------|
| Ce(1) – C(6) (Cot)                       | 2.640(4)            |
| Ce(1) – C(7) (Cot)                       | 2.657(4)            |
| Ce(1) – C(8) (Cot)                       | 2.656(4)            |
| Ce(1) – C(9) (Cot)                       | 2.664(4)            |
| <b>Ce(1) – Cent (Cot)</b>                | <b>1.94</b>         |
| Ce(1) – C(1A) (Cnt)                      | 2.750(12)           |
| Ce(1) – C(1B) (Cnt)                      | 2.84(2)             |
| Ce(1) – C(2A) (Cnt)                      | 2.878(15)           |
| Ce(1) – C(2B) (Cnt)                      | 2.88(2)             |
| Ce(1) – C(3A) (Cnt)                      | 2.900(15)           |
| Ce(1) – C(3B) (Cnt)                      | 2.89(2)             |
| Ce(1) – C(4A) (Cnt)                      | 2.887(15)           |
| Ce(1) – C(4B) (Cnt)                      | 2.90(2)             |
| Ce(1) – C(5A) (Cnt)                      | 2.857(15)           |
| Ce(1) – C(5B) (Cnt)                      | 2.94(2)             |
| <b>Ce(1) – Cent (Cnt-trans)</b>          | <b>2.08</b>         |
| <b>Ce(1) – Cent (Cnt-cis)</b>            | <b>2.14</b>         |
| <b>Ce(1) – Cent (Cnt-8C)</b>             | <b>2.04</b>         |
| Plane (Cot) ^Plane (Cnt-cis)             | 5.53 °              |
| Plane (Cot) ^Plane (Cnt-8C)              | 3.39 °              |
| Cent-Cot - Ce(1) - Cent-Cnt-trans        | 176.27 °            |
| Cent-Cot - Ce(1) - Cent-Cnt-cis          | 176.41 °            |
| Cent-Cot - Ce(1) - Cent-Cnt-8C           | 179.6 °             |
| Plane (C(2)/C(1)/C(2')) ^Plane (Cnt-cis) | 5.53 °              |

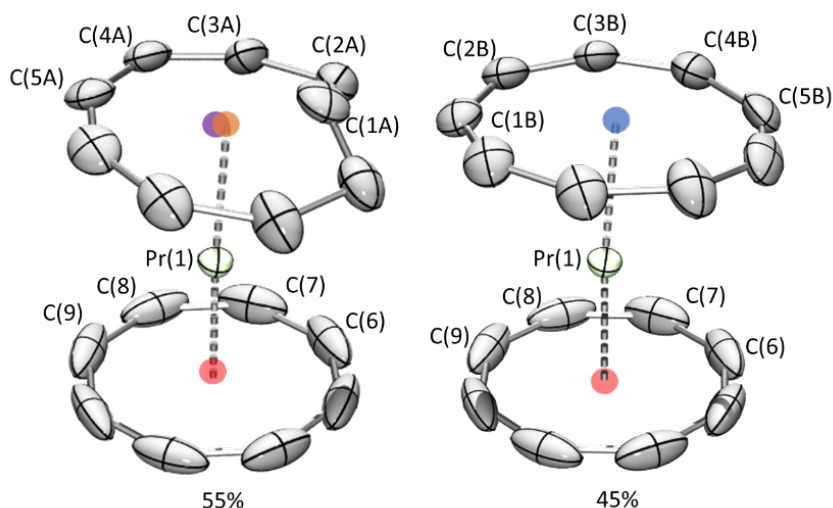

Figure S38: Molecular structure of 2-Pr-trans (55% ratio).

Table S17: Summary of bond length and angles from the ligands to the metal center.

|                                                      | Main distances in Å |
|------------------------------------------------------|---------------------|
| Pr(1) – C(6) (Cot)                                   | 2.637(5)            |
| Pr(1) – C(7) (Cot)                                   | 2.631(6)            |
| Pr(1) – C(8) (Cot)                                   | 2.639(6)            |
| Pr(1) – C(9) (Cot)                                   | 2.637(5)            |
| <b>Pr(1) – Cent (Cot)</b>                            | <b>1.91</b>         |
| Pr(1) – C(1A) (Cnt)                                  | 2.749(15)           |
| Pr(1) – C(1B) (Cnt)                                  | 2.84(2)             |
| Pr(1) – C(2A) (Cnt)                                  | 2.87(2)             |
| Pr(1) – C(2B) (Cnt)                                  | 2.87(2)             |
| Pr(1) – C(3A) (Cnt)                                  | 2.87(2)             |
| Pr(1) – C(3B) (Cnt)                                  | 2.88(2)             |
| Pr(1) – C(4A) (Cnt)                                  | 2.88(2)             |
| Pr(1) – C(4B) (Cnt)                                  | 2.89(2)             |
| Pr(1) – C(5A) (Cnt)                                  | 2.815(16)           |
| Pr(1) – C(5B) (Cnt)                                  | 2.90(2)             |
| <b>Pr(1) – Cent (Cnt<sup>trans</sup>)</b>            | <b>2.09</b>         |
| <b>Pr(1) – Cent (Cnt<sup>cis</sup>)</b>              | <b>2.08</b>         |
| <b>Pr(1) – Cent (Cnt-8C)</b>                         | <b>2.04</b>         |
| Plane (Cot) ^Plane (Cnt <sup>cis</sup> )             | 5.12°               |
| Plane (Cot) ^Plane (Cnt-8C)                          | 2.88°               |
| Cent (Cot) - Pr(1) – Cent (Cnt <sup>trans</sup> )    | 176.76°             |
| Cent (Cot) - Pr(1) - Cent (Cnt <sup>cis</sup> )      | 176.16°             |
| Cent (Cot) - Pr(1) - Cent (Cnt-8C)                   | 178.99°             |
| Plane (C(2)/C(1)/C(2')) ^Plane (Cnt <sup>cis</sup> ) | 47.68°              |

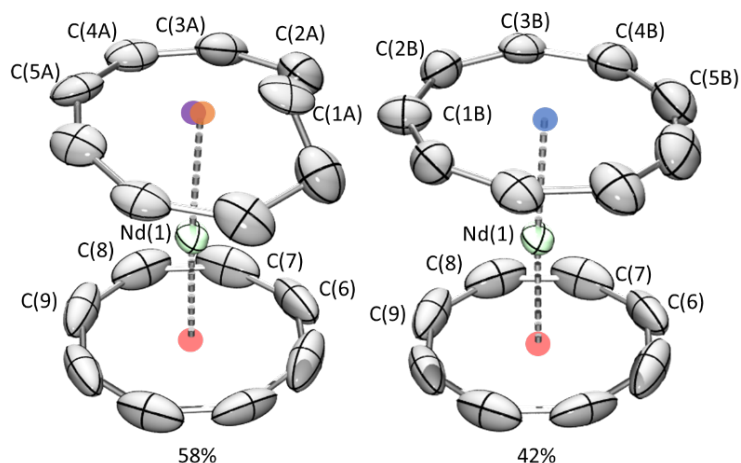

Figure S39: Molecular structure of 2-Nd-trans (58% ratio).

Table S18: Summary of bond length and angles from the ligands to the metal center.

|                                          | Main distances in Å |
|------------------------------------------|---------------------|
| Nd(1) – C(6) (Cot)                       | 2.619(8)            |
| Nd(1) – C(7) (Cot)                       | 2.614(9)            |
| Nd(1) – C(8) (Cot)                       | 2.641(9)            |
| Nd(1) – C(9) (Cot)                       | 2.629(9)            |
| <b>Nd(1) – Cent (Cot)</b>                | <b>1.90</b>         |
| Nd(1) – C(1A) (Cnt)                      | 2.79(2)             |
| Nd(1) – C(1B) (Cnt)                      | 2.84(2)             |
| Nd(1) – C(2A) (Cnt)                      | 2.89(2)             |
| Nd(1) – C(2B) (Cnt)                      | 2.88(2)             |
| Nd(1) – C(3A) (Cnt)                      | 2.91(2)             |
| Nd(1) – C(3B) (Cnt)                      | 2.91(2)             |
| Nd(1) – C(4A) (Cnt)                      | 2.85(2)             |
| Nd(1) – C(4B) (Cnt)                      | 2.89(2)             |
| Nd(1) – C(5A) (Cnt)                      | 2.81(2)             |
| Nd(1) – C(5B) (Cnt)                      | 2.86(2)             |
| <b>Nd(1) – Cent (Cnt-trans)</b>          | <b>2.08</b>         |
| <b>Nd(1) – Cent (Cnt-cis)</b>            | <b>2.06</b>         |
| <b>Nd(1) – Cent (Cnt-8C)</b>             | <b>2.03</b>         |
| Plane (Cot) ^Plane (Cnt-cis)             | 3.7 °               |
| Plane (Cot) ^Plane (Cnt-8C)              | 4.44 °              |
| Cent-Cot - Nd(1) - Cent-Cnt-trans        | 177.00 °            |
| Cent-Cot - Nd(1) - Cent-Cnt-cis          | 176.8 °             |
| Cent-Cot - Nd(1) - Cent-Cnt-8C           | 178.78 °            |
| Plane (C(2)/C(1)/C(2')) ^Plane (Cnt-cis) | 50.15 °             |

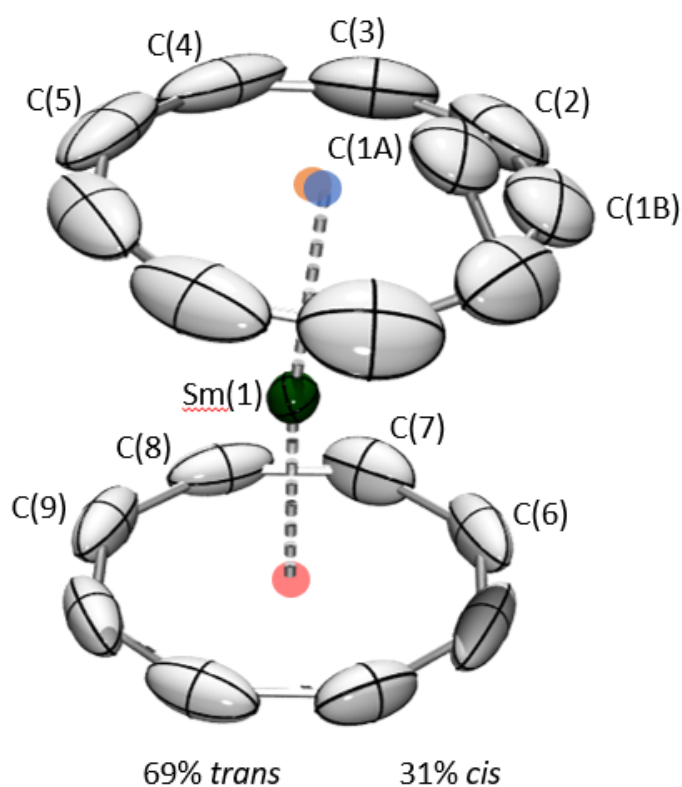

Figure S40: Molecular structure of 2-Sm-*trans* (69% ratio).

Table S19: Summary of bond length and angles from the ligands to the metal center.

|                                                   | Main distances in Å |
|---------------------------------------------------|---------------------|
| Sm(1) – C(6) (Cot)                                | 2.594(5)            |
| Sm(1) – C(7) (Cot)                                | 2.591(6)            |
| Sm(1) – C(8) (Cot)                                | 2.601(6)            |
| Sm(1) – C(9) (Cot)                                | 2.595(6)            |
| <b>Sm(1) – Cent (Cot)</b>                         | <b>1.85</b>         |
| Sm(1) – C(1A) (Cnt)                               | 2.687(13)           |
| Sm(1) – C(1B) (Cnt)                               | 2.82(3)             |
| Sm(1) – C(2) (Cnt)                                | 2.857(9)            |
| Sm(1) – C(3) (Cnt)                                | 2.879(9)            |
| Sm(1) – C(4) (Cnt)                                | 2.834(9)            |
| Sm(1) – C(5) (Cnt)                                | 2.763(6)            |
| <b>Sm(1) – Cent (Cnt-<i>trans</i>)</b>            | <b>2.054</b>        |
| <b>Sm(1) – Cent (Cnt-<i>cis</i>)</b>              | <b>2.01</b>         |
| Plane (Cot) ^Plane (Cnt- <i>cis</i> )             | 3.54 °              |
| Cent-Cot - Sm(1) - Cent-Cnt- <i>trans</i>         | 175.96 °            |
| Cent-Cot - Sm(1) - Cent-Cnt- <i>cis</i>           | 173.37 °            |
| Plane (C(2)/C(1)/C(2')) ^Plane (Cnt- <i>cis</i> ) | 42.80 °             |



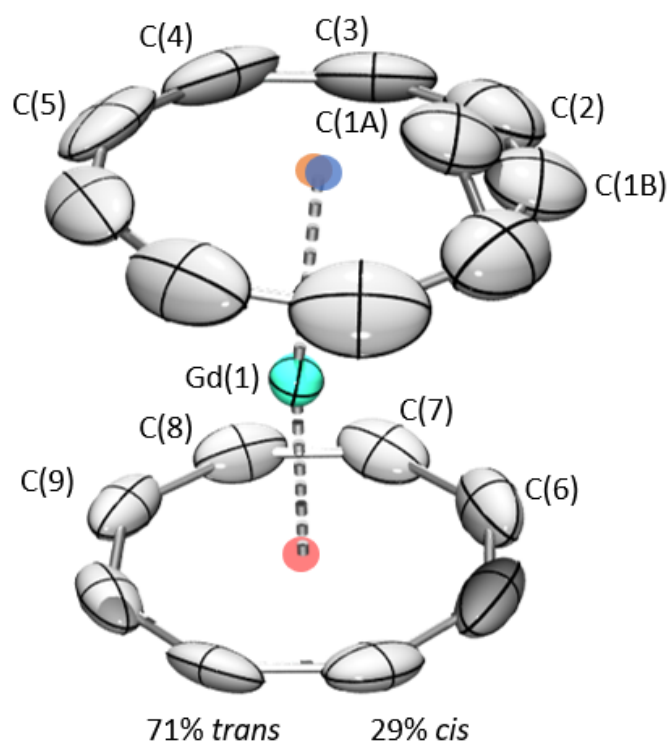

**Figure S41:** Molecular structure of 2-Gd-*trans* (71% ratio).

**Table S20:** Summary of bond length and angles from the ligands to the metal center.

|                                                   | Main distances in Å |
|---------------------------------------------------|---------------------|
| Gd(1) – C(6) (Cot)                                | 2.559(7)            |
| Gd(1) – C(7) (Cot)                                | 2.575(7)            |
| Gd(1) – C(8) (Cot)                                | 2.582(6)            |
| Gd(1) – C(9) (Cot)                                | 2.565(7)            |
| <b>Gd(1) – Cent (Cot)</b>                         | <b>1.82</b>         |
| Gd(1) – C(1A) (Cnt)                               | 2.703(17)           |
| Gd(1) – C(1B) (Cnt)                               | 2.81(5)             |
| Gd(1) – C(2) (Cnt)                                | 2.853(10)           |
| Gd(1) – C(3) (Cnt)                                | 2.872(9)            |
| Gd(1) – C(4) (Cnt)                                | 2.828(10)           |
| Gd(1) – C(5) (Cnt)                                | 2.749(9)            |
| <b>Gd(1) – Cent (Cnt-<i>trans</i>)</b>            | <b>2.04</b>         |
| <b>Gd(1) – Cent (Cnt-<i>cis</i>)</b>              | <b>2.003</b>        |
| Plane (Cot) ^Plane (Cnt- <i>cis</i> )             | 3.63 °              |
| Cent-Cot - Gd(1) - Cent-Cnt- <i>trans</i>         | 175.04 °            |
| Cent-Cot - Gd(1) - Cent-Cnt- <i>cis</i>           | 172.72 °            |
| Plane (C(2)/C(1)/C(2')) ^Plane (Cnt- <i>cis</i> ) | 45.34 °             |

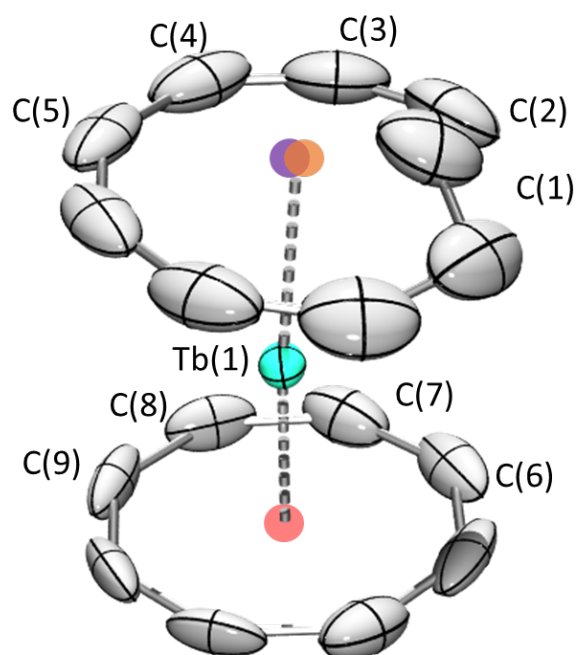

Figure S42: Molecular structure of 2-Tb-trans (100% ratio).

Table S21: Summary of bond length and angles from the ligands to the metal center.

|                                         | Main distances in Å |
|-----------------------------------------|---------------------|
| Tb(1) – C(6) (Cot)                      | 2.537(9)            |
| Tb(1) – C(7) (Cot)                      | 2.563(11)           |
| Tb(1) – C(8) (Cot)                      | 2.566(9)            |
| Tb(1) – C(9) (Cot)                      | 2.540(9)            |
| <b>Tb(1) – Cent (Cot)</b>               | <b>1.80</b>         |
| Tb(1) – C(1) (Cnt)                      | 2.664(16)           |
| Tb(1) – C(2) (Cnt)                      | 2.837(12)           |
| Tb(1) – C(3) (Cnt)                      | 2.885(12)           |
| Tb(1) – C(4) (Cnt)                      | 2.828(12)           |
| Tb(1) – C(5) (Cnt)                      | 2.722(10)           |
| <b>Tb(1) – Cent (Cnt)</b>               | <b>2.01</b>         |
| <b>Tb(1) – Cent (Cnt) – 8C</b>          | <b>1.97</b>         |
| Plane (Cot) ^Plane (Cnt 8C)             | 3.94 °              |
| Cent-Cot - Tb(1) - Cent-Cnt             | 175.74 °            |
| Cent-Cot - Tb(1) - Cent-Cnt 8C          | 179.97 °            |
| Plane (C(2)/C(1)/C(2')) ^Plane (Cnt 8C) | 48.14 °             |

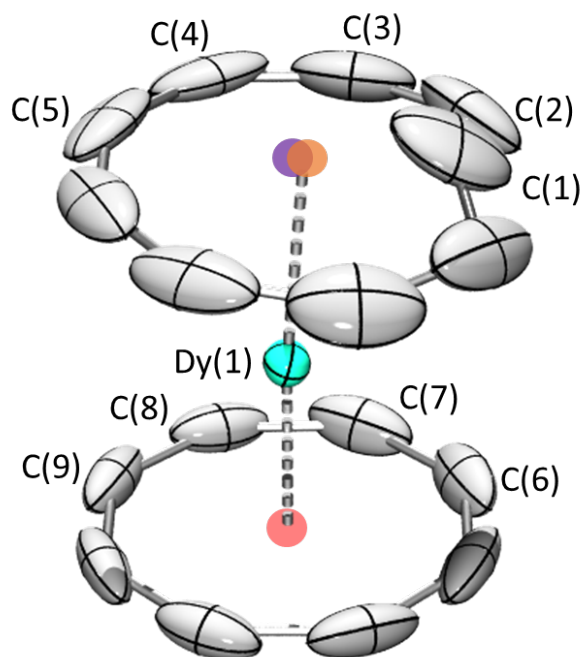

Figure S43: Molecular structure of 2-Dy-trans (100% ratio).

Table S22: Summary of bond length and angles from the ligands to the metal center.

|                                         | Main distances in Å |
|-----------------------------------------|---------------------|
| Dy(1) – C(6) (Cnt)                      | 2.534(5)            |
| Dy(1) – C(7) (Cnt)                      | 2.544(5)            |
| Dy(1) – C(8) (Cnt)                      | 2.543(5)            |
| Dy(1) – C(9) (Cnt)                      | 2.544(5)            |
| Dy(1) – Cent (Cot)                      | 1.78                |
| Dy(1) – C(1) (Cnt)                      | 2.660(9)            |
| Dy(1) – C(2) (Cnt)                      | 2.825(9)            |
| Dy(1) – C(3) (Cnt)                      | 2.858(9)            |
| Dy(1) – C(4) (Cnt)                      | 2.806(6)            |
| Dy(1) – C(5) (Cnt)                      | 2.720(6)            |
| Dy(1) – Cent (Cnt)                      | 1.99                |
| Dy(1) – Cent (Cnt) – 8C                 | 1.96                |
| Plane (Cot) ^Plane (Cnt 8C)             | 3.52 °              |
| Cent-Cot - Dy(1) - Cent-Cnt             | 179.57 °            |
| Cent-Cot - Dy(1)- Cent-Cnt 8C           | 175.75 °            |
| Plane (C(2)/C(1)/C(2')) ^Plane (Cnt 8C) | 52.63 °             |

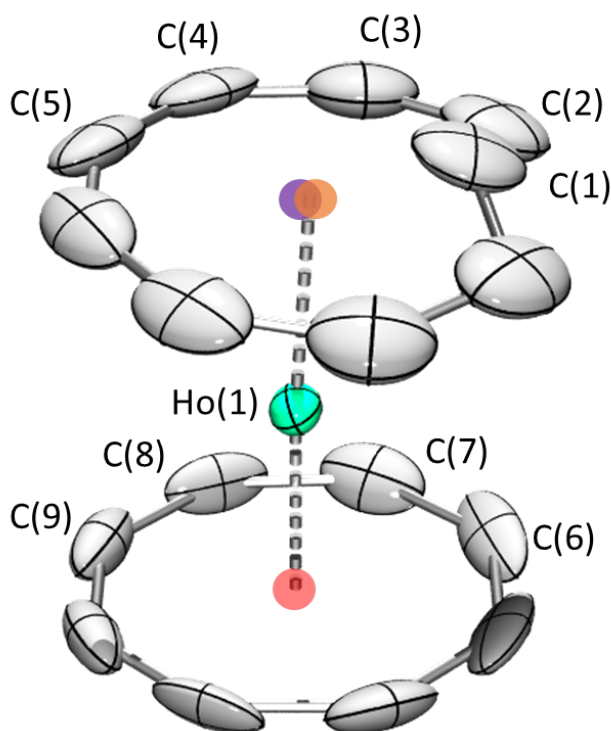

Figure S44: Molecular structure of 2-Ho-trans (100% ratio).

Table S23: Summary of bond length and angles from the ligands to the metal center.

|                                         | Main distances in Å |
|-----------------------------------------|---------------------|
| Ho(1) – C(6) (Cot)                      | 2.518(7)            |
| Ho(1) – C(7) (Cot)                      | 2.529(8)            |
| Ho(1) – C(8) (Cot)                      | 2.524(7)            |
| Ho(1) – C(9) (Cot)                      | 2.534(6)            |
| Ho(1) – Cent (Cot)                      | 1.76                |
| Ho(1) – C(1) (Cnt)                      | 2.673(11)           |
| Ho(1) – C(2) (Cnt)                      | 2.819(9)            |
| Ho(1) – C(3) (Cnt)                      | 2.86(1)             |
| Ho(1) – C(4) (Cnt)                      | 2.805(8)            |
| Ho(1) – C(5) (Cnt)                      | 2.684(7)            |
| Ho(1) – Cent (Cnt)                      | 2.00                |
| Ho(1) – Cent (Cnt) – 8C                 | 1.95                |
| Plane (Cot) ^Plane (Cnt 8C)             | 3.36 °              |
| Cent-Cot - Ho(1) - Cent-Cnt             | 176.73 °            |
| Cent-Cot - Ho(1)- Cent-Cnt 8C           | 178.81 °            |
| Plane (C(2)/C(1)/C(2')) ^Plane (Cnt 8C) | 50.85 °             |

## 6. UV-visible Spectroscopy

### a. KCnt

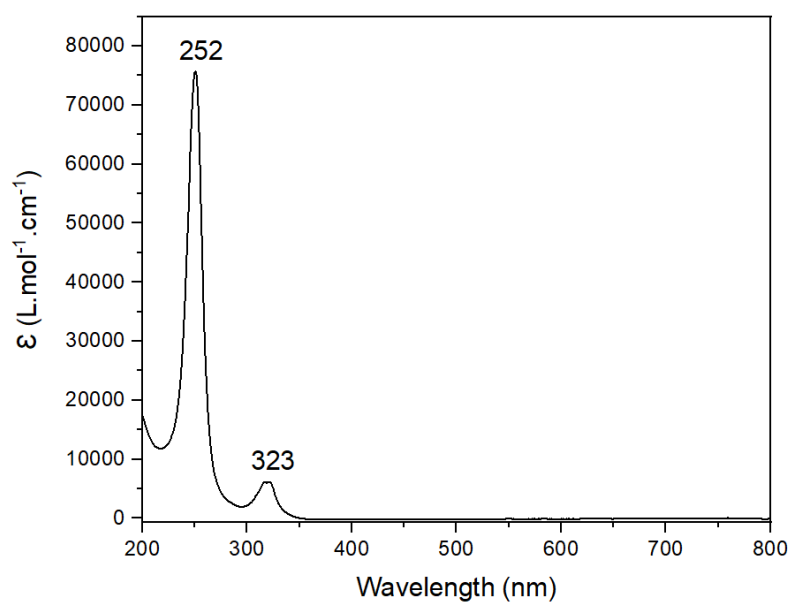

Figure S45: UV-Visible spectrum of KCnt-cis in MeCN ( $3.0 \times 10^{-5} \text{ M}$ )

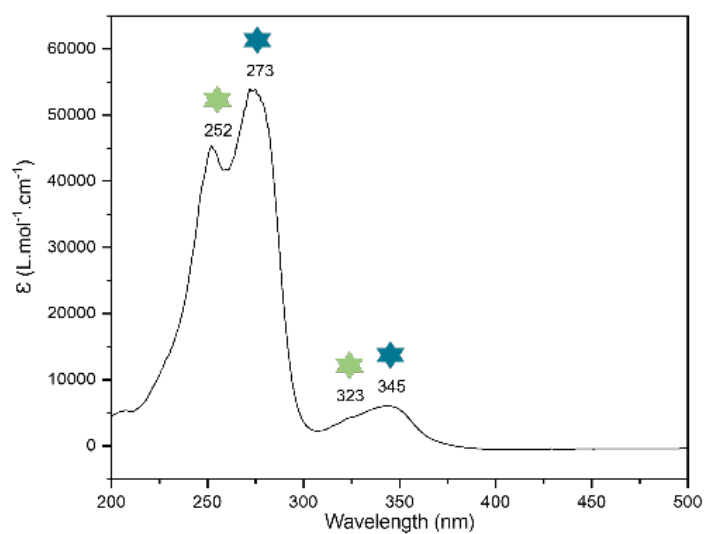

Figure S46: UV-Visible spectrum of KCnt-trans in MeCN ( $3.07 \times 10^{-4} \text{ M}$ ). KCnt-trans in blue, KCnt-cis in green.

b. LnCotCnt

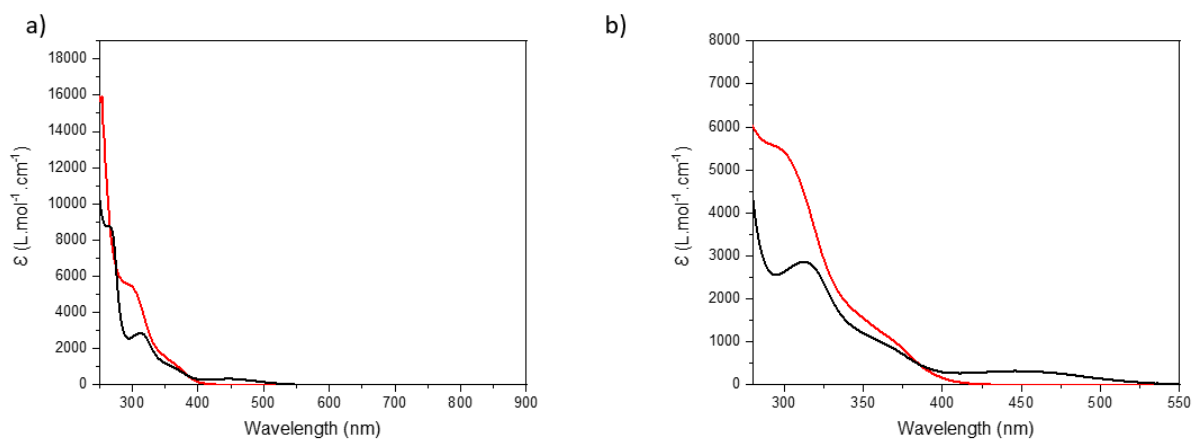

**Figure S47:** UV-Visible spectra of 2-Y (trans isomer in black  $1.16 \cdot 10^{-3}$  M cis isomer in red  $1.16 \cdot 10^{-3}$  M) in DCM. b) zoom in on the irradiation wavelength

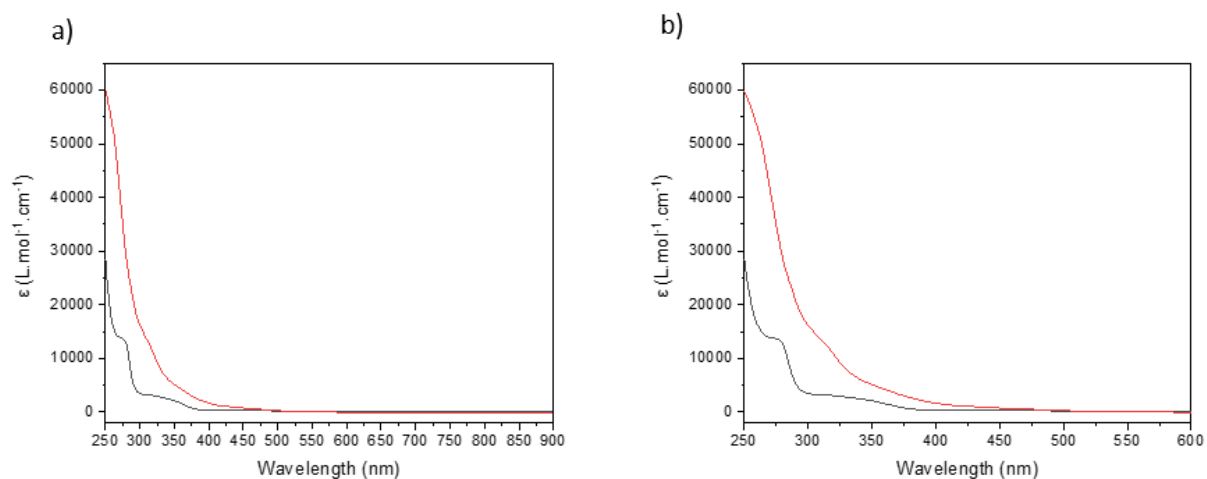

**Figure S48:** a) UV-Visible spectra of 2-La (cis isomer in red  $2.57 \cdot 10^{-4}$  M, trans isomer in black  $4.74 \cdot 10^{-4}$  M) in DCM. b) zoom in on the irradiation wavelength

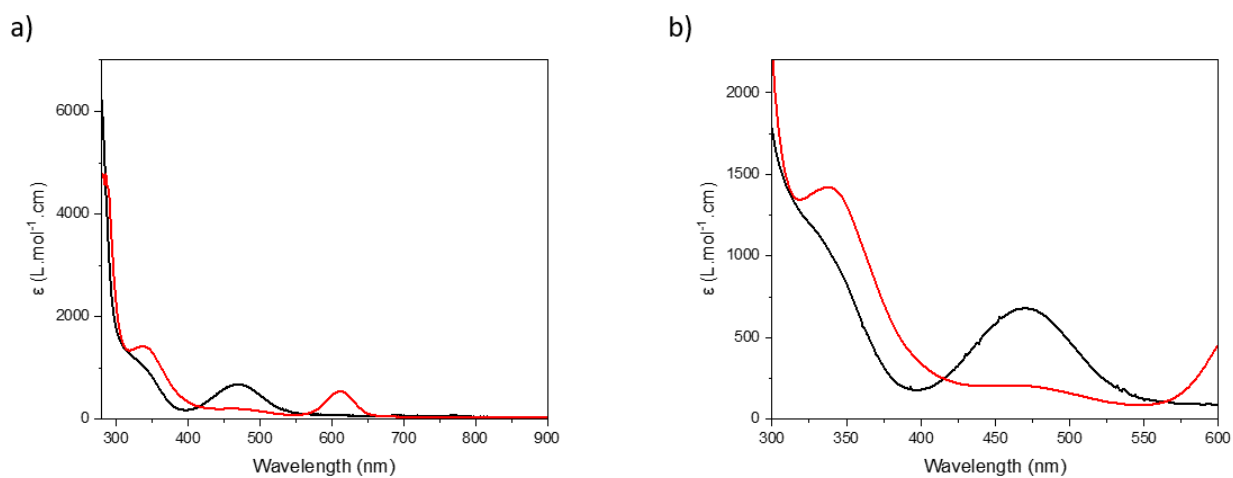

**Figure S49:** UV-Visible spectra of 2-Ce (cis isomer in red  $4.15 \cdot 10^{-4}$  M, trans isomer in black  $3.32 \cdot 10^{-4}$  M) in DCM. b) zoom in on the irradiation wavelength

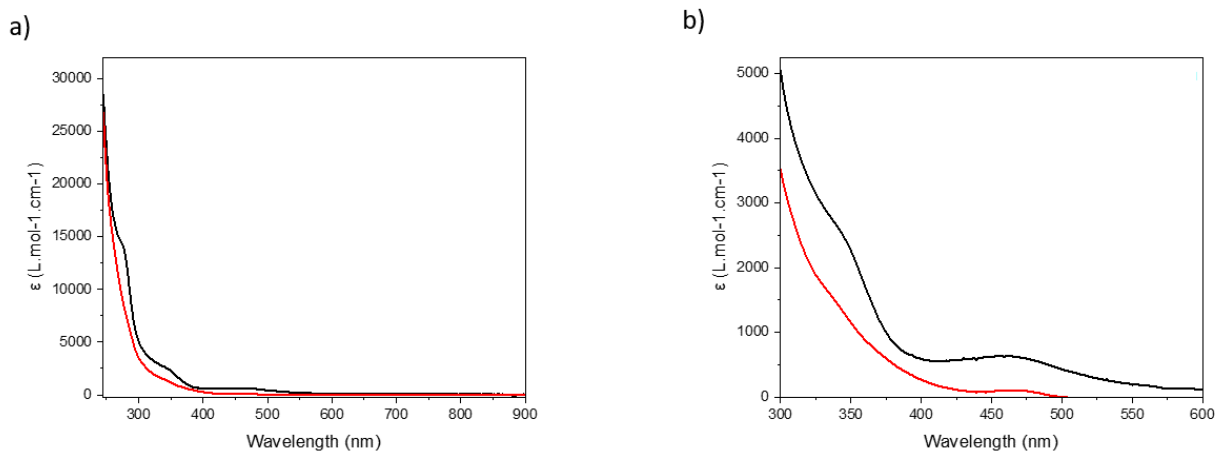

**Figure S50:** UV-Visible spectra of **2-Pr** (cis isomer in red  $4.83 \cdot 10^{-4}$  M, trans isomer in black  $2.76 \cdot 10^{-4}$  M) in DCM. b) zoom in on the irradiation wavelength

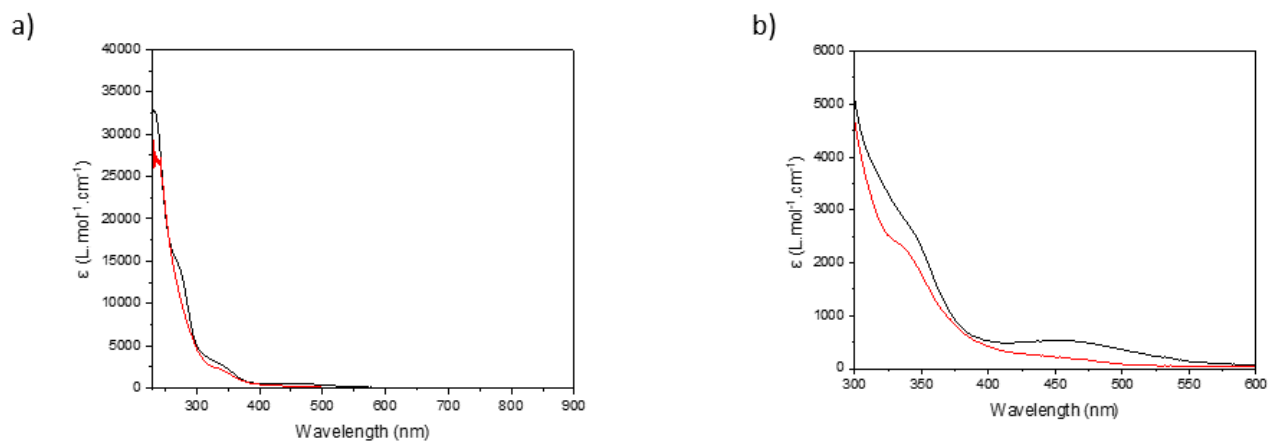

**Figure S51:** UV-Visible spectra of **2-Nd** (cis isomer in red  $6.84 \cdot 10^{-4}$  M, trans isomer in black  $3.56 \cdot 10^{-4}$  M) in DCM. b) zoom in on the irradiation wavelength

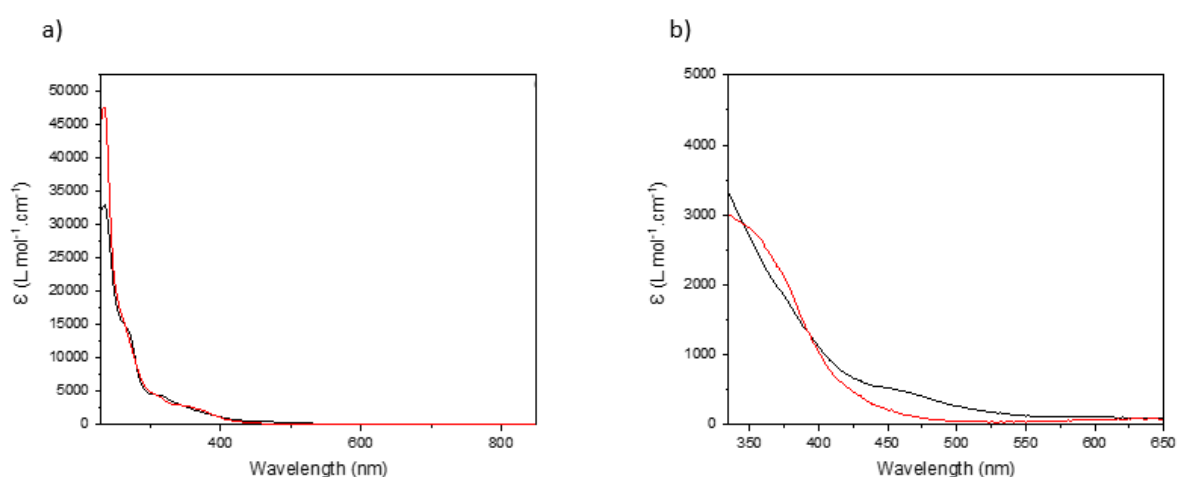

**Figure S52:** a) UV-Visible spectra of **2-Sm** (cis isomer in red  $2.7 \cdot 10^{-4}$  M, trans isomer in black  $3.5 \cdot 10^{-4}$  M) in DCM. b) zoom in on the irradiation wavelength

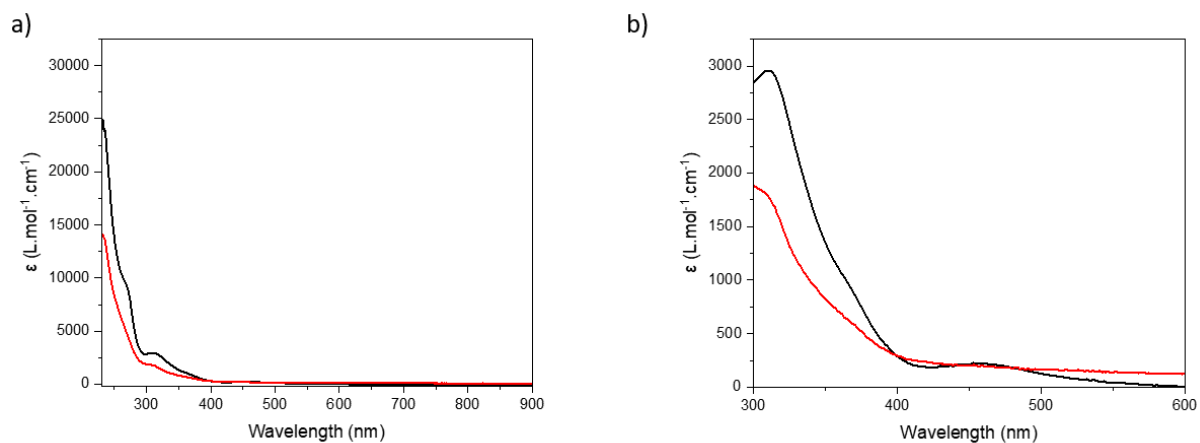

**Figure S53:** UV-Visible spectrum of **2-Gd** (cis isomer in red  $7.04 \cdot 10^{-4}$  M, trans isomer in black  $6.34 \cdot 10^{-4}$  M) in DCM. b) zoom in on the irradiation wavelength

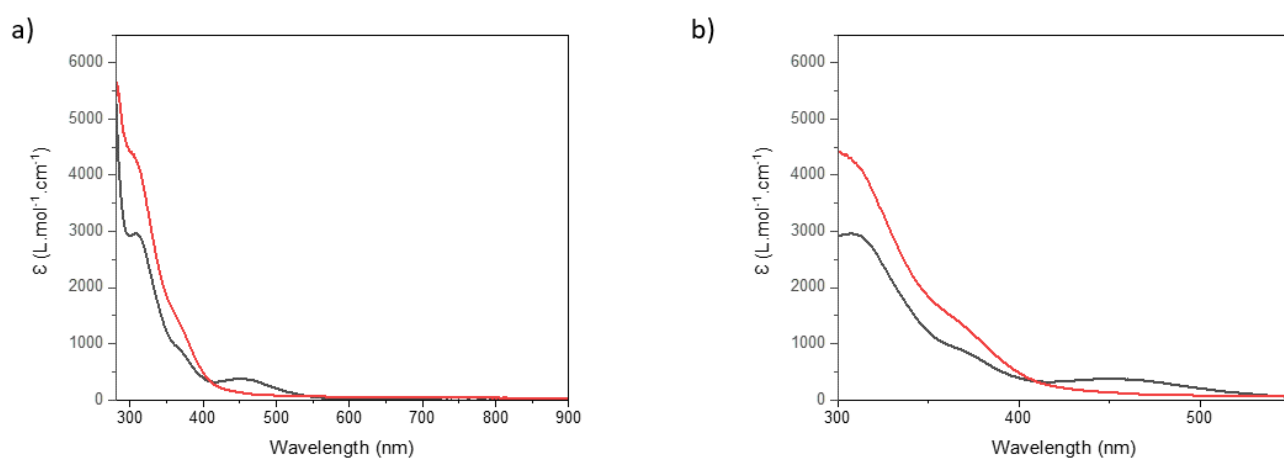

**Figure S54:** UV-Visible spectrum of **2-Tb** (cis isomer in red  $3.42 \cdot 10^{-3}$  M, trans isomer in black  $1.05 \cdot 10^{-3}$  M) in DCM. b) zoom in on the irradiation wavelength

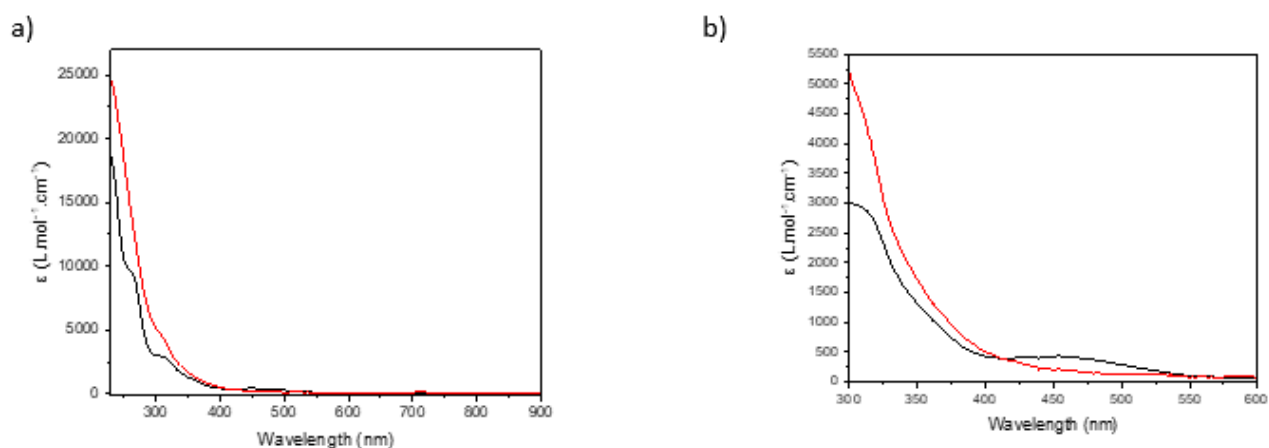

**Figure S55:** UV-Visible spectrum of **2-Dy** (cis isomer in red  $1.69 \cdot 10^{-4}$  M, trans isomer in black  $2.60 \cdot 10^{-4}$  M) in DCM. b) zoom in on the irradiation wavelength



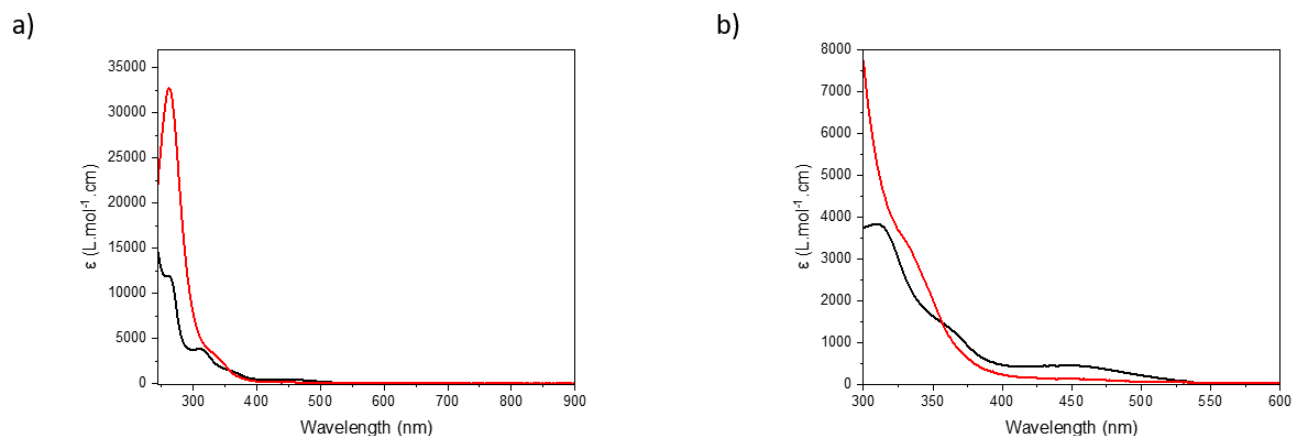

**Figure S56:** UV-Visible spectrum of **2-Ho** (cis isomer in red  $2.80 \cdot 10^{-4}$  M, trans isomer in black  $3.37 \cdot 10^{-4}$  M) in DCM. b) zoom in on the irradiation wavelength

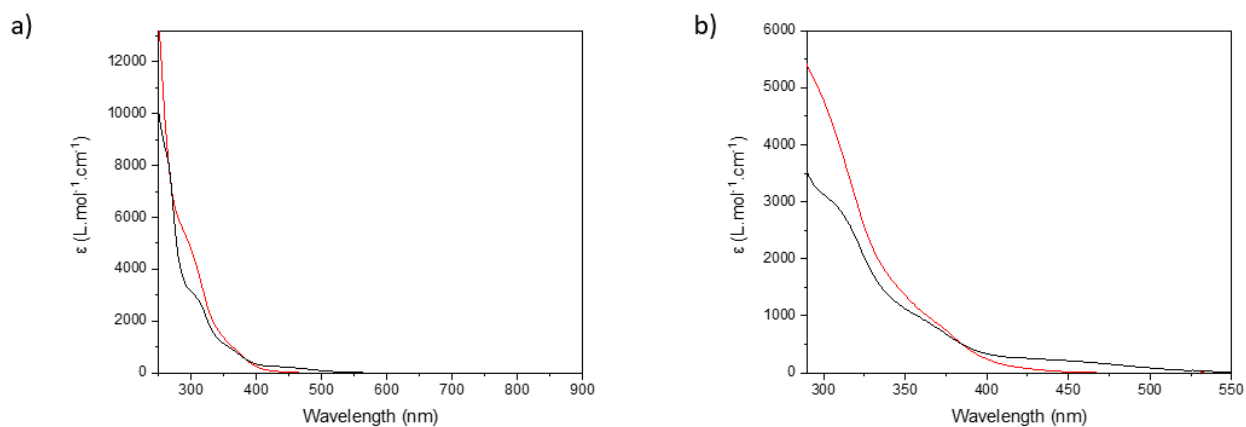

**Figure S57:** a) UV-Visible spectrum of **2-Er** (cis isomer in red  $9.43 \cdot 10^{-4}$  M, trans isomer in black  $9.43 \cdot 10^{-4}$  M) in DCM. b) zoom in on the irradiation wavelength. The trans isomer was generated through photoirradiation at 370nm for 10 min.

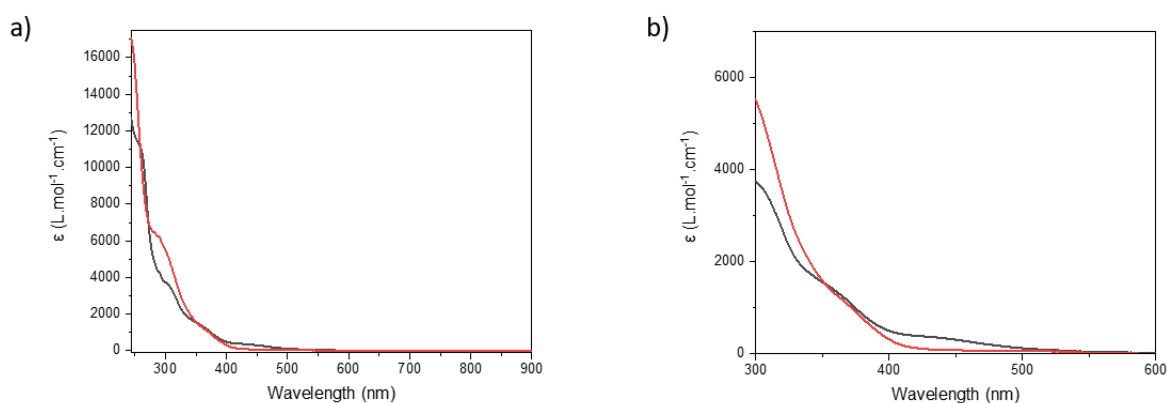

**Figure S58:** a) UV-Visible spectrum of **2-Tm** (cis isomer in red  $7.68 \cdot 10^{-4}$  M, trans isomer in black  $7.68 \cdot 10^{-4}$  M) in DCM. b) zoom in on the irradiation wavelength. The trans isomer was generated through photoirradiation at 370nm for 10 min.

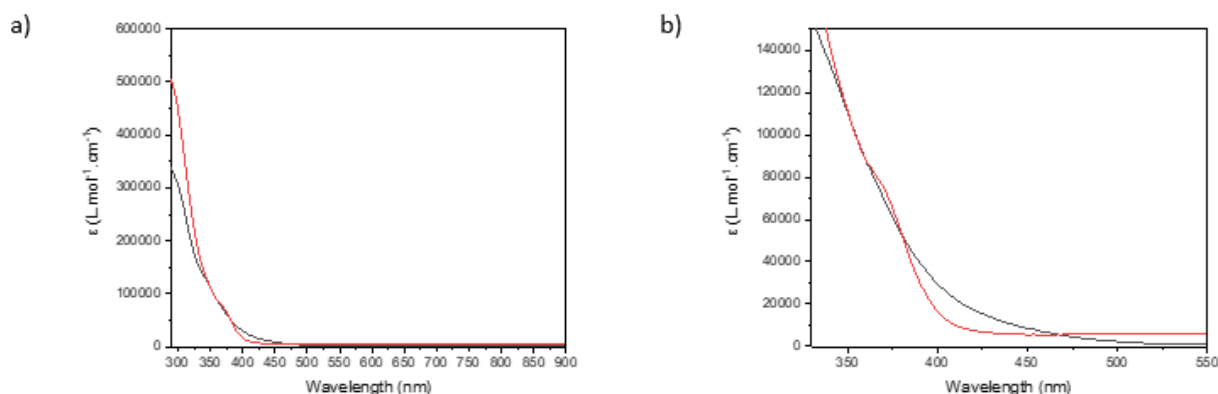

**Figure S59:** a) UV-Visible spectrum of **2-Lu** (*cis* isomer in red  $3.28 \cdot 10^{-3}$  M, *trans* isomer in black  $3.28 \cdot 10^{-3}$  M) in DCM. b) zoom in on the irradiation wavelength The *trans* isomer was generated through photoirradiation at 370nm for 10 min.

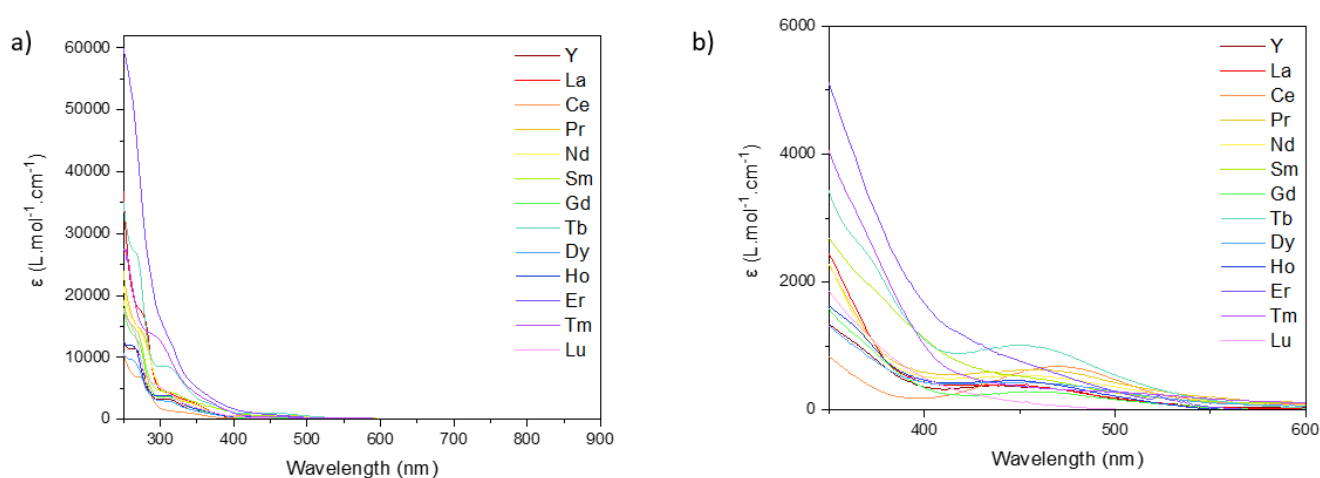

**Figure S60:** a) UV-Visible spectra of all **2-Ln-trans** in DCM. b) zoom in on the irradiation wavelength

## 7. Isomerization study

**General details.** Studies were conducted in an NMR tube in toluene- $d_8$  and irradiated in a black box with an adapted NMR tube holder. All tubes were protected from the light in aluminum foil during the convoy from the irradiation box to the NMR spectrometer.

For the Photo stationary state study, all samples were irradiated 30 min at each  $\lambda$  (2 X 15min) to ensure that the PSS was reached. The irradiation range was performed on Kessil's lamp (370 nm, 390 nm, 427 nm, 440 nm, 450 nm, 467 nm, and 525 nm). The irradiation started from 370 nm to 525 nm, and in order to test the reversibility of the isomerization, the samples were irradiated stepwise from 525 nm to 370 nm. For **2-Ce**, an additional lamp was used from Prizmatix FC5-LED Multi channel light source (655 nm). The irradiation took place inside the NMR with an adapted Young NMR tube to put an optic fiber inside. The irradiation lasted a total of 2h 50 min (1h 40 min + 50 min to reach the PSS)

It must be noted that all UV-Vis spectra of the **2-Ln-trans** display a mixture of the *cis* and *trans* isomer.

a) UV and NMR study  
i. KCnt Isomerization

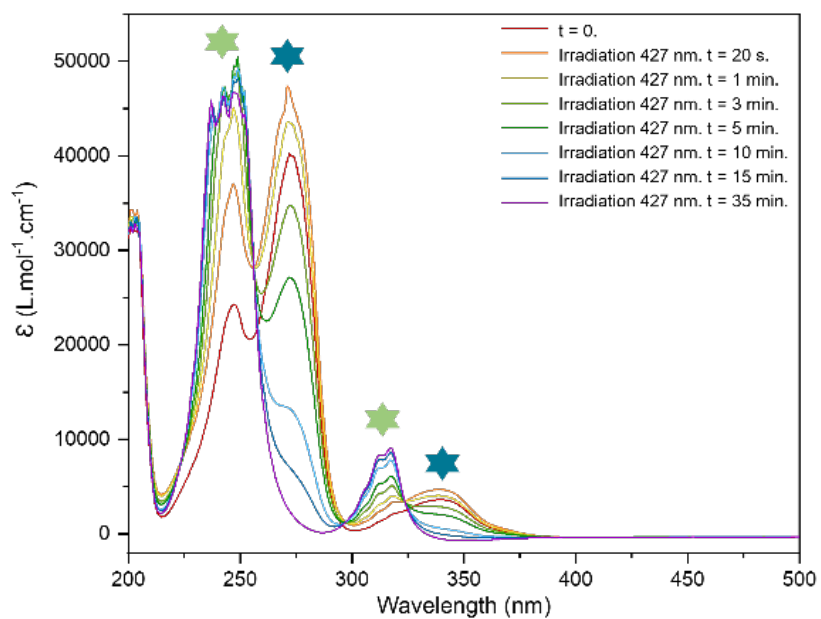

**Figure S61:** Isomerization study by UV-visible spectroscopy of KCnt in THF. Green star: absorption band attributed to KCnt-cis; Blue star: absorption band attributed to KCnt-trans

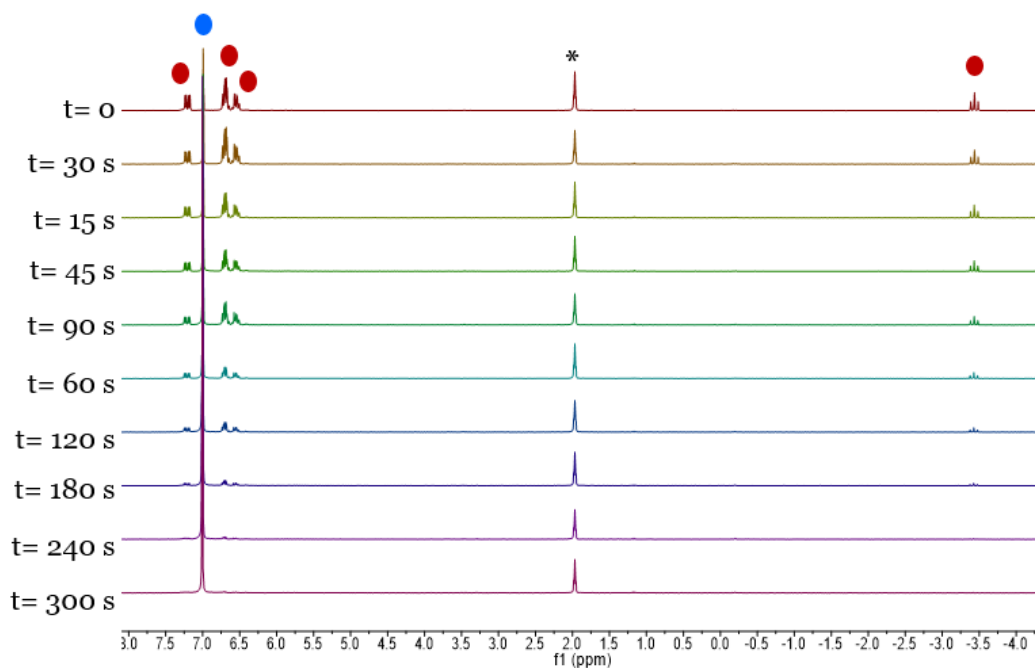

**Figure S62:** Isomerization study by  $^1\text{H}$  NMR of KCnt in  $\text{CD}_3\text{CN}$  at 427 nm. Red dots: signals attributed to the trans isomer; blue dot: signal attributed to the cis isomer

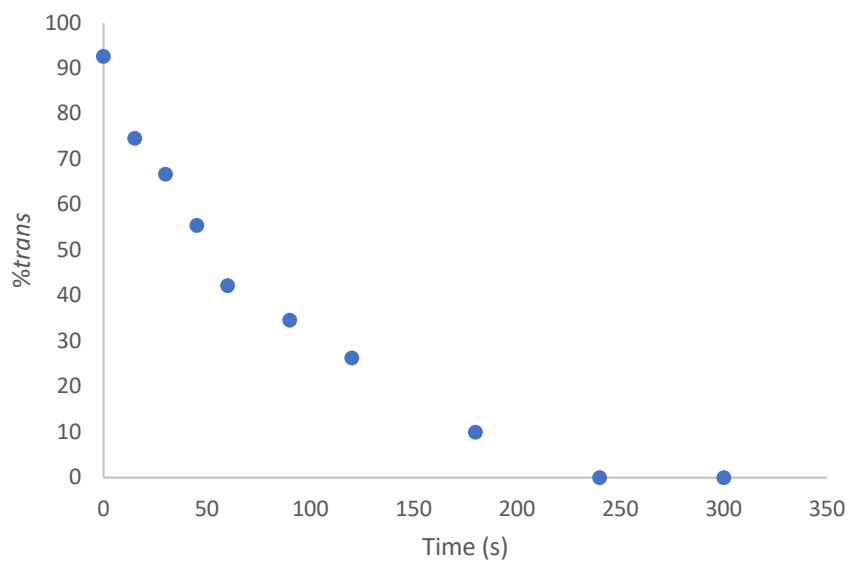

Figure S63: Plotted data of KCnt isomerization

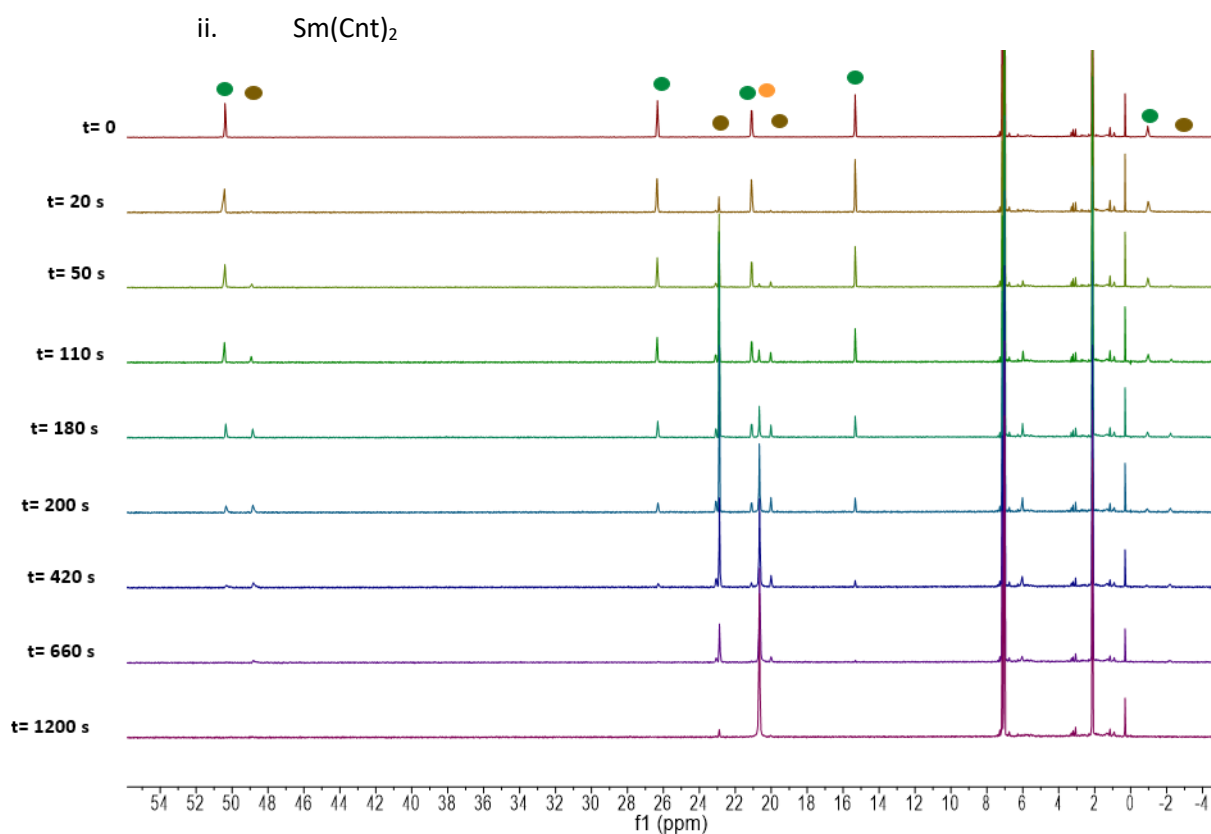

Figure S64: Isomerization study by  $^1\text{H}$  NMR of **1** in toluene at 427 nm. Green dots: signals attributed to the trans, trans isomer; brown dots: signals attributed to the cis, trans isomer; yellow dot: signals attributed to the cis, cis isomer.

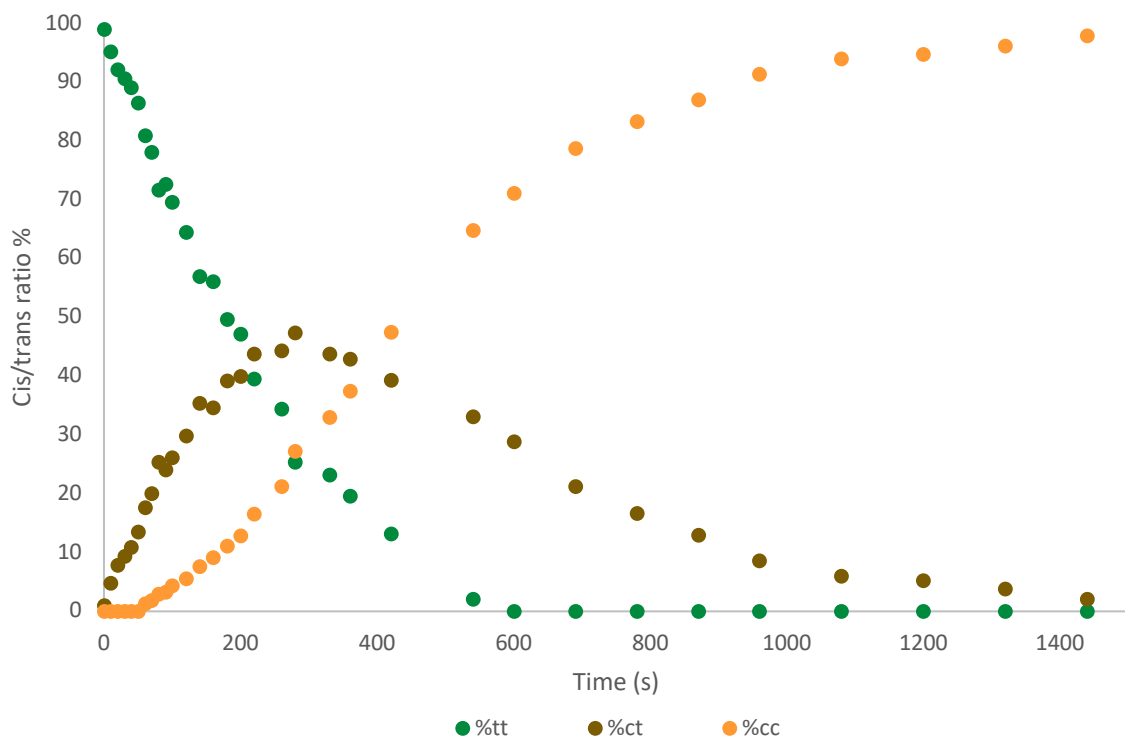

Figure S65: Plotted data of **1** in toluene at 427 nm.

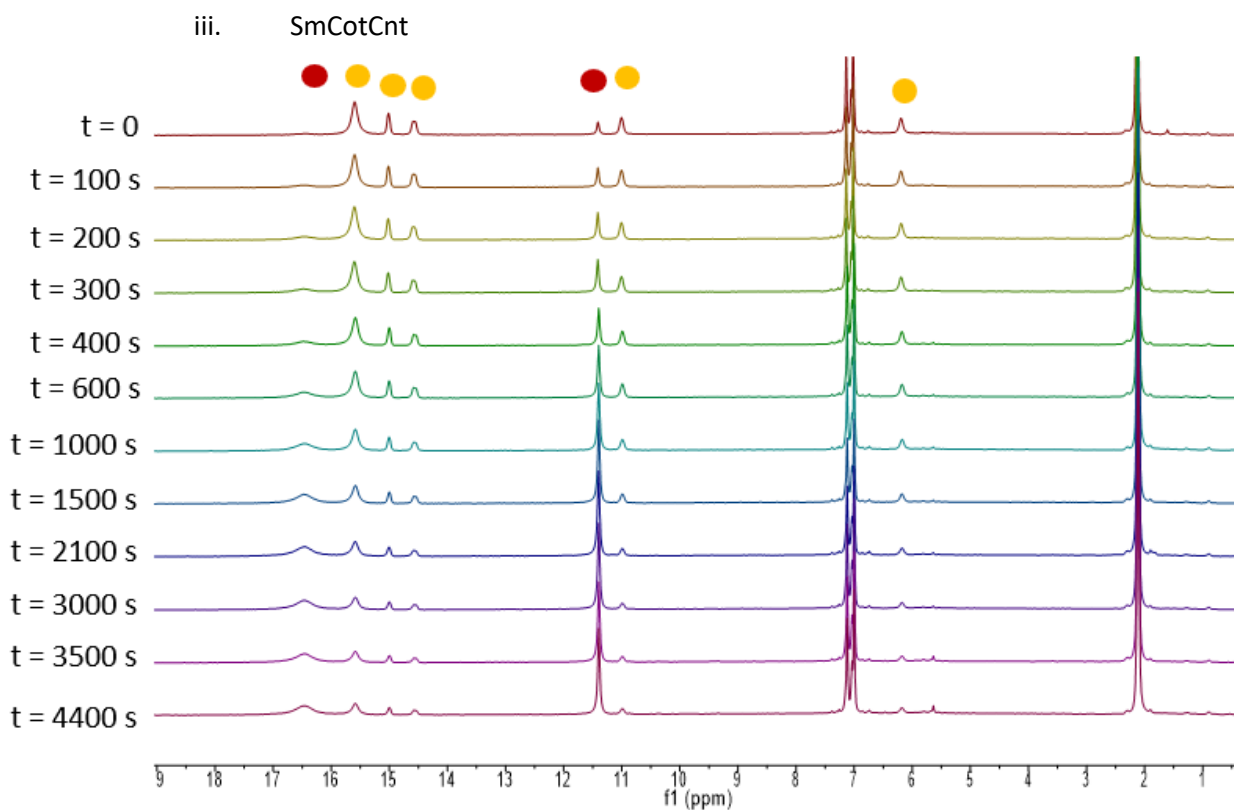

Figure S66: Isomerization study by  $^1\text{H}$  NMR of **2-Sm** in toluene at 427 nm. Red dots: signals attributed to the trans isomer; yellow dots: signals attributed to the cis isomer.

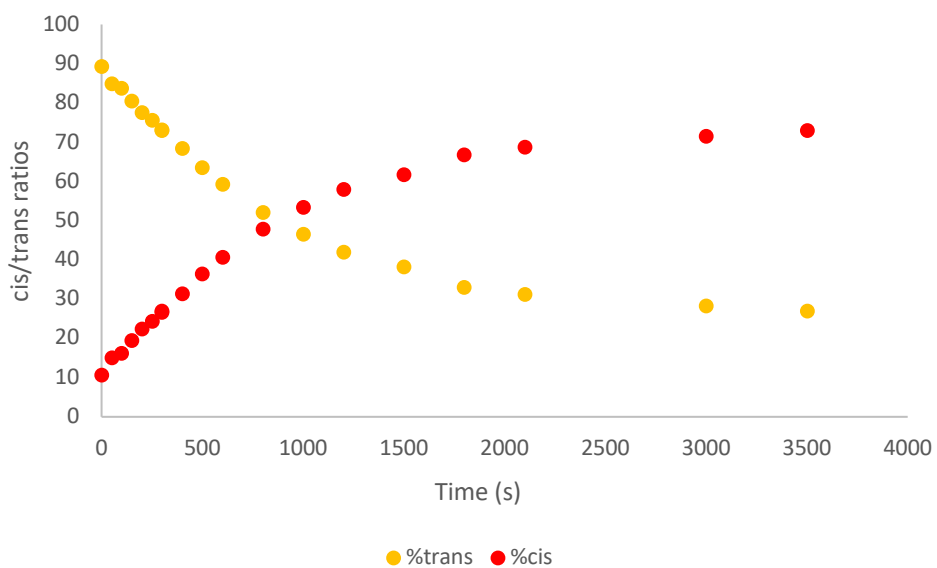

Figure S67: Plotted data of 2-Sm in toluene at 427 nm

b) Photostationary (PSS) study

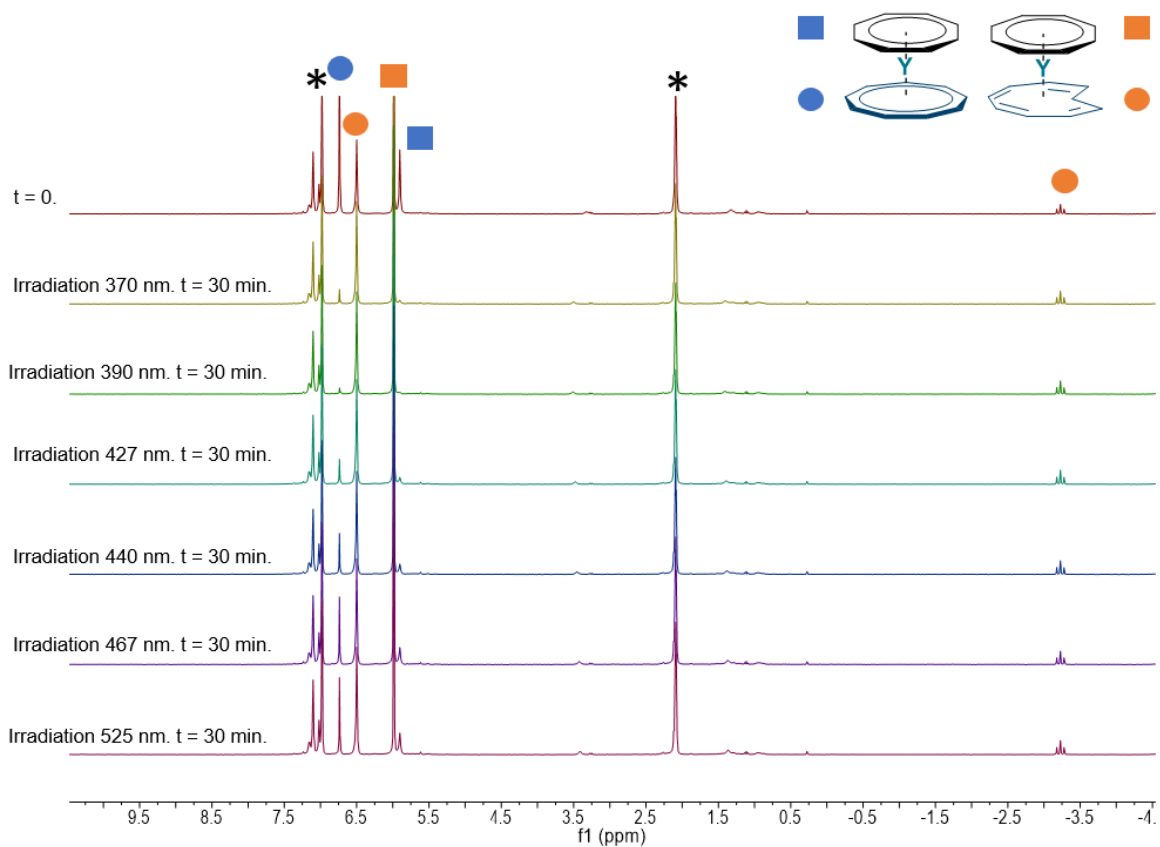

Figure S68: Isomerization study by  $^1\text{H}$  NMR of 2-Y in toluene- $d_8$  measured at 293 K at different wavelength (\* residual protio signal of the solvent)

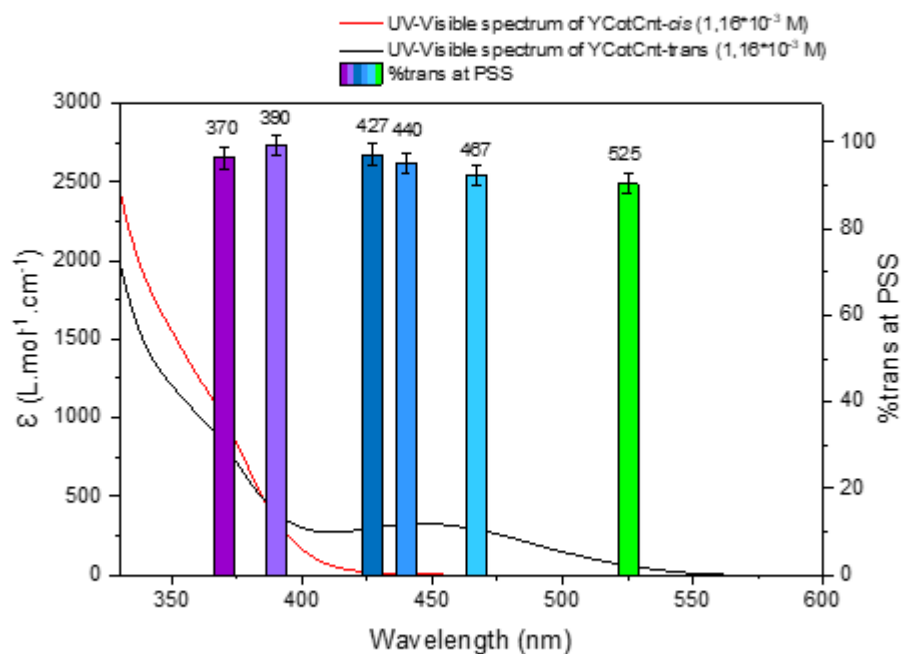

Figure S69: Evolution of the trans/cis ratios of 2-Y under different wavelengths superimposed with UV spectra of trans and cis isomer

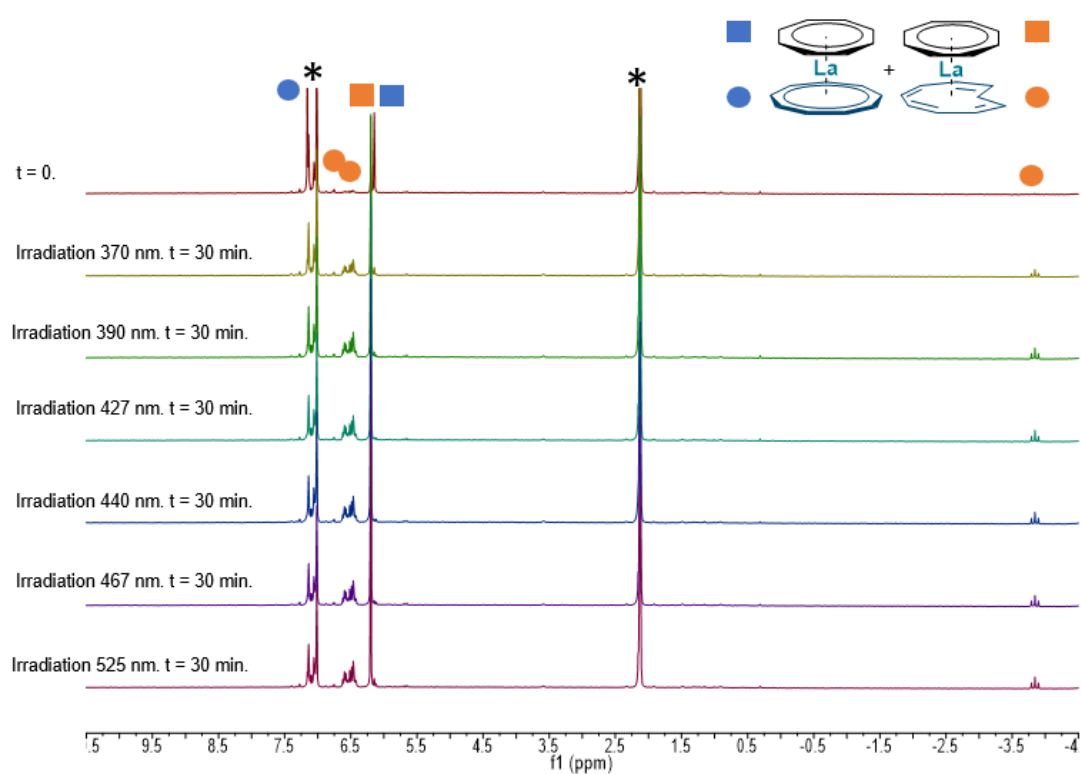

Figure S70: Isomerization study by  $^1H$  NMR of 2-La in  $toluene-d_8$  measured at 293 K at different wavelengths (\* residual protio signal of the solvent)

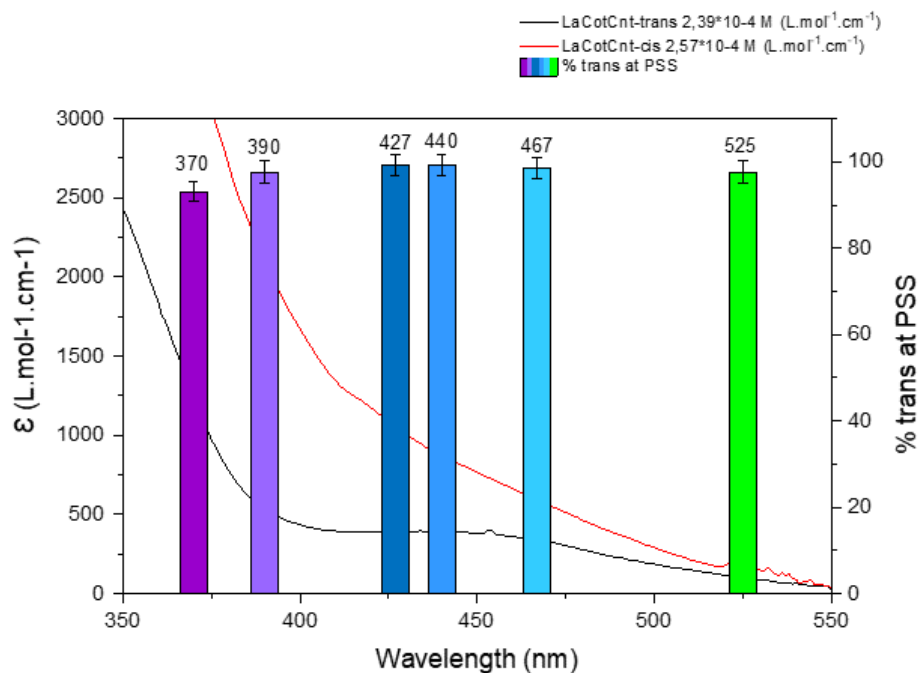

Figure S71: Evolution of the trans/cis ratios of 2-La under different wavelengths superimposed with UV spectra of trans and cis isomer

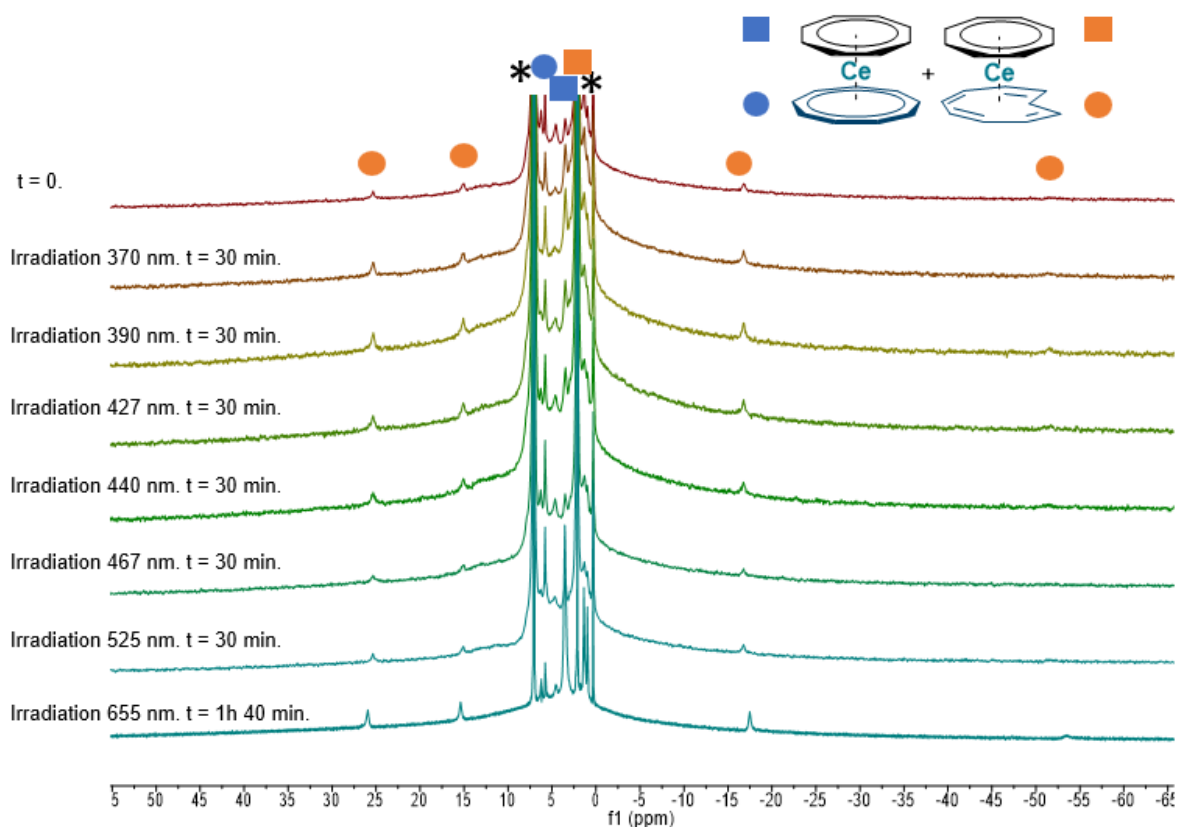

Figure S72 : Isomerization study by <sup>1</sup>H NMR of 2-Ce in toluene-d<sub>8</sub> measured at 293 K at different wavelengths (\* residual protio signal of the solvent)



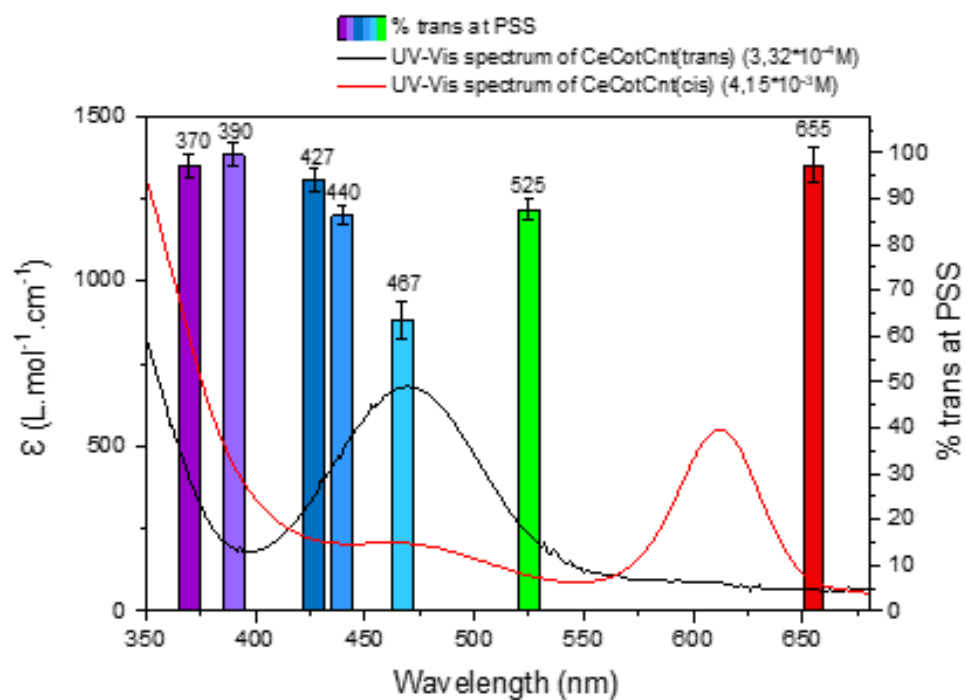

Figure S73: Evolution of the trans/cis ratios of 2-Ce under different wavelengths superimposed with UV spectra of trans isomer

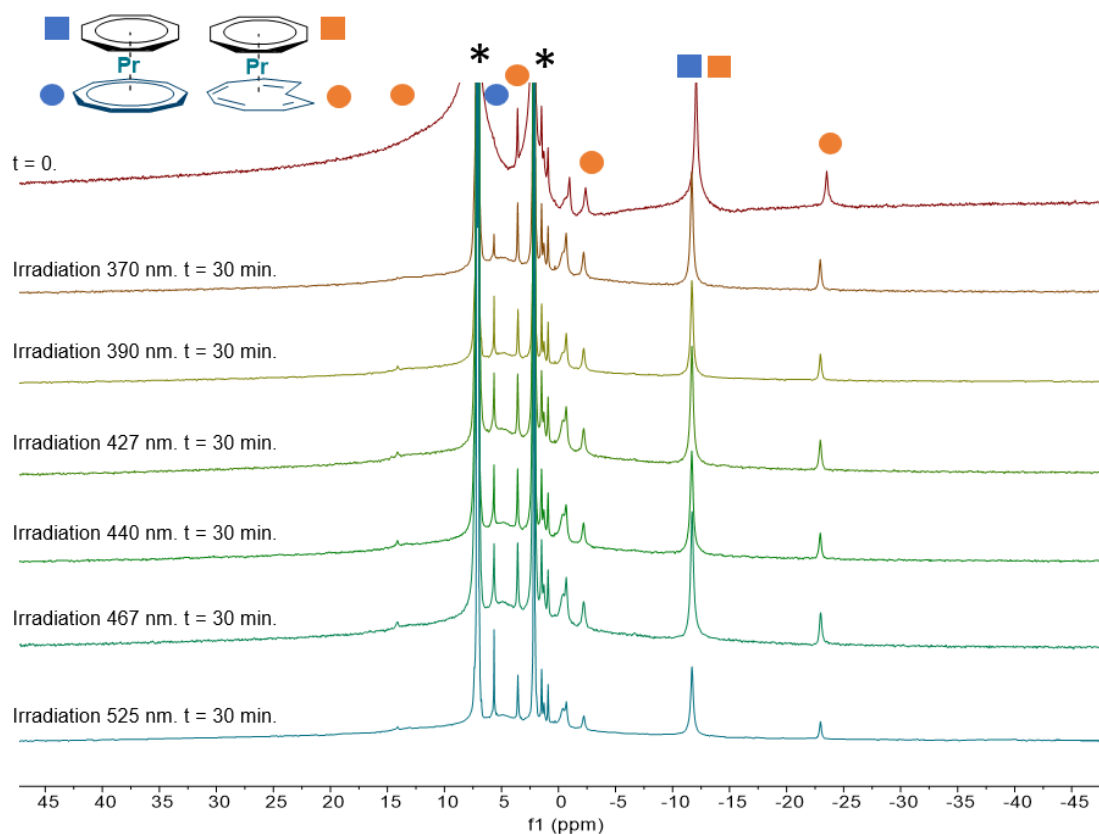

Figure S74: Isomerization study by  $^1H$  NMR of 2-Pr in  $toluene-d_8$  measured at 293 K at different wavelengths (\* residual protio signal of the solvent)

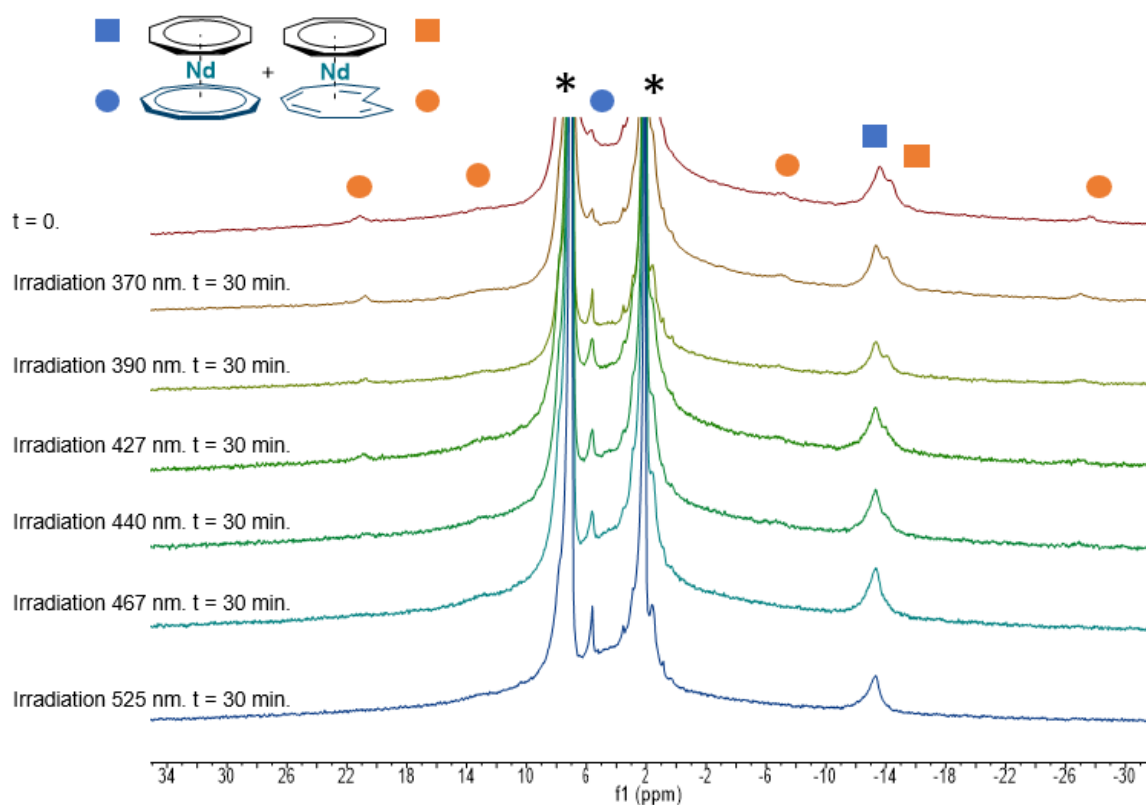

**Figure S75:** Isomerization study by  $^1\text{H}$  NMR of **2-Nd** in  $\text{toluene-}d_8$  measured at 293 K at different wavelengths (\* residual protio signal of the solvent)

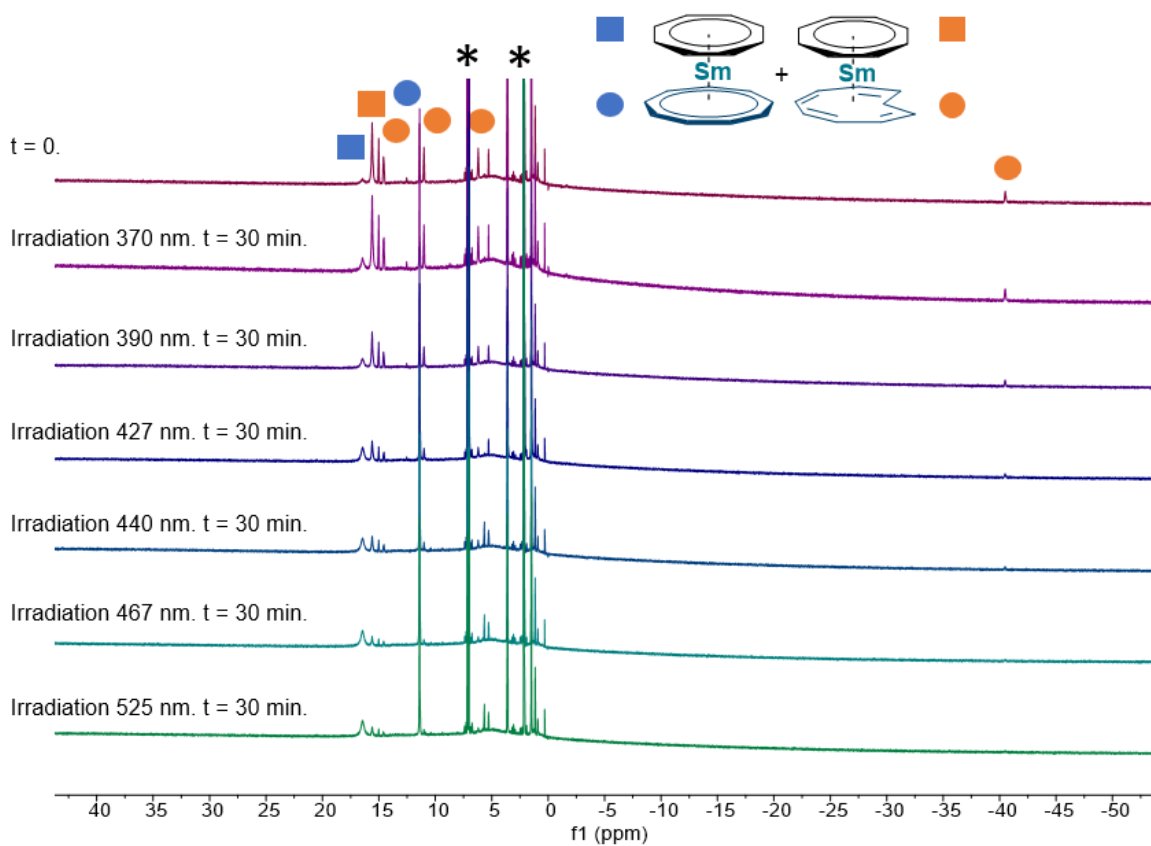

**Figure S76:** Isomerization study by  $^1\text{H}$  NMR of **2-Sm** in  $\text{toluene-}d_8$  measured at 293 K at different wavelengths (\* residual protio signal of the solvent)

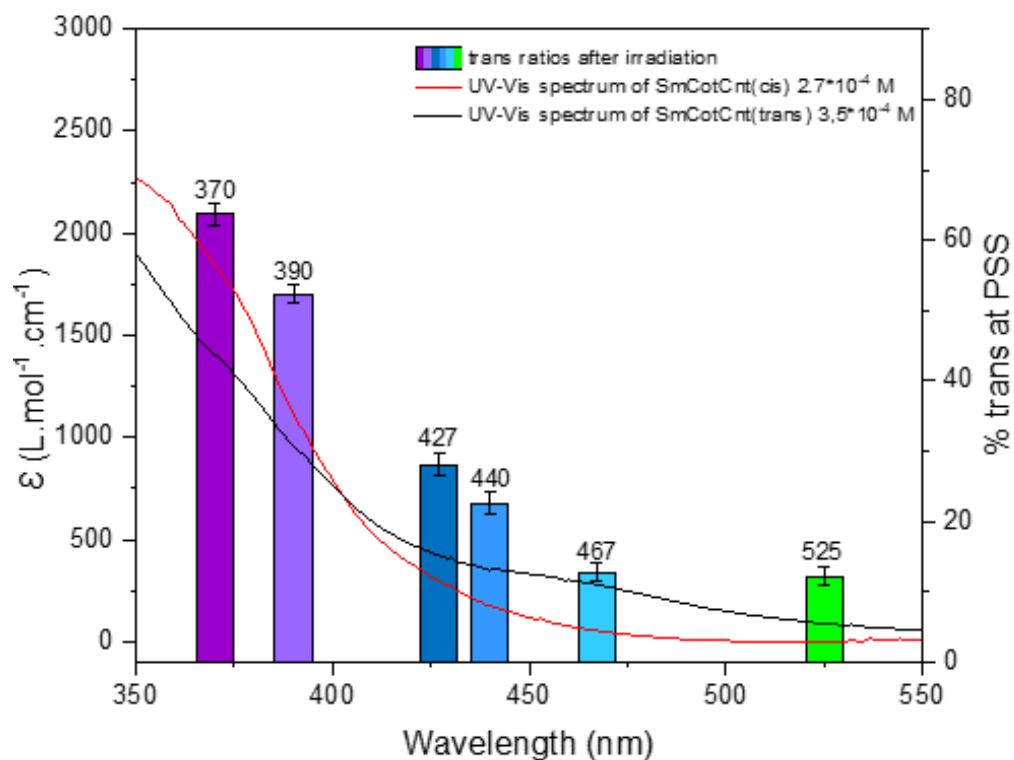

Figure S77: Evolution of the trans/cis ratios of 2-Sm under different wavelengths superimposed with UV spectra of the cis and trans isomers

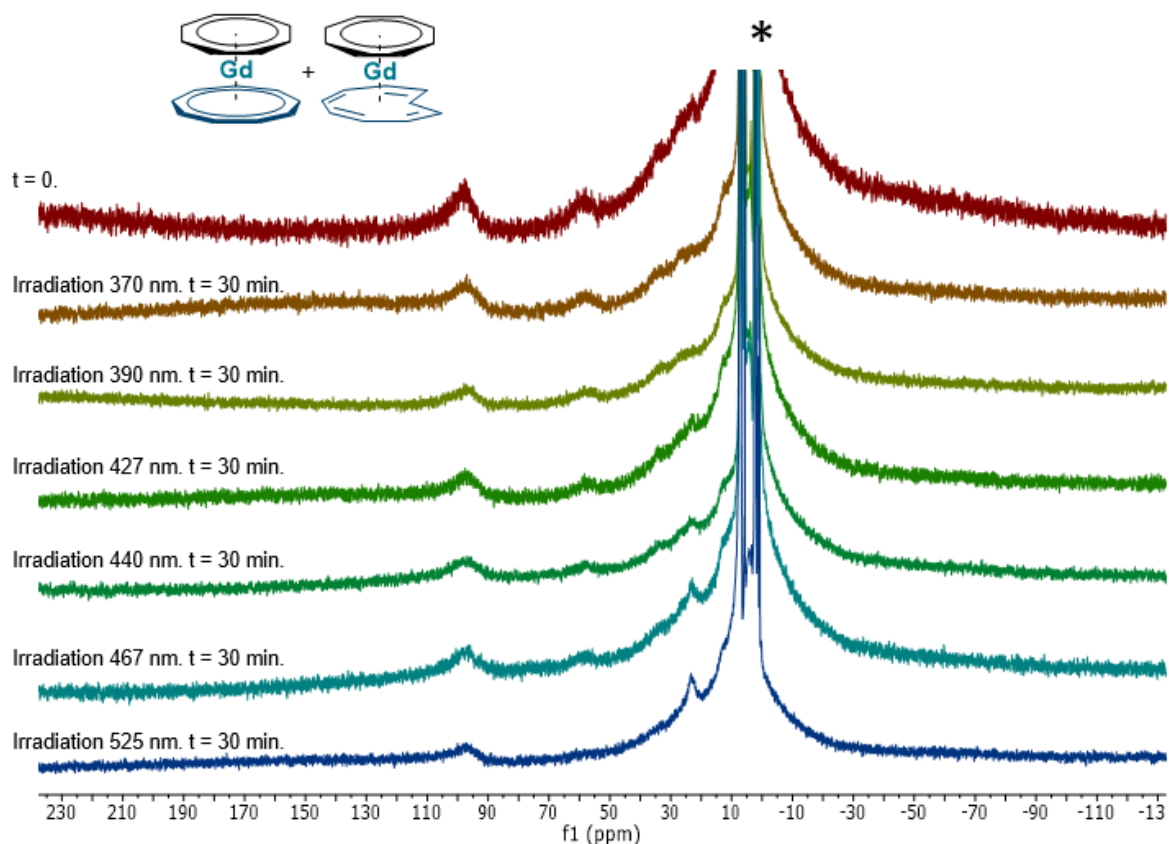

Figure S78: Isomerization study by  $^1\text{H}$  NMR of 2-Gd in toluene- $d_8$  measured at 293 K at different wavelengths (\* residual protio signal of the solvent)

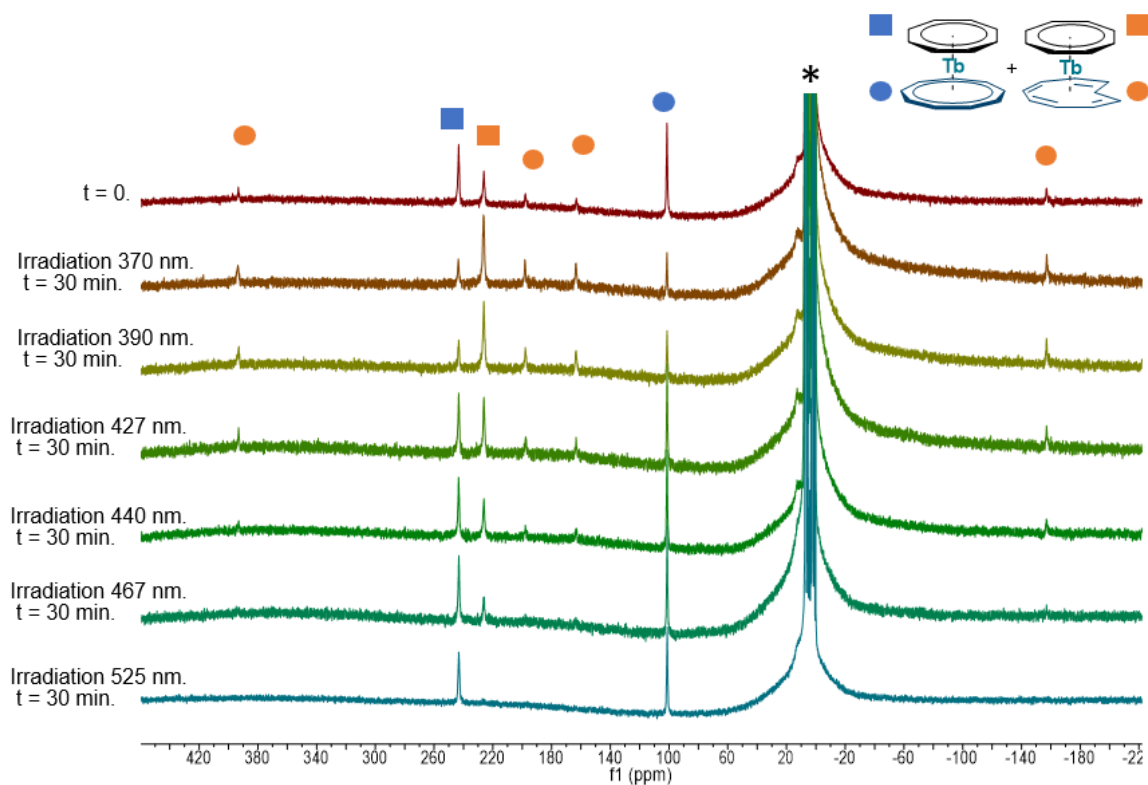

**Figure S79:** Isomerization study by  $^1\text{H}$  NMR of 2-Tb in toluene- $d_8$  measured at 293 K at different wavelengths (\* residual protio signal of the solvent)

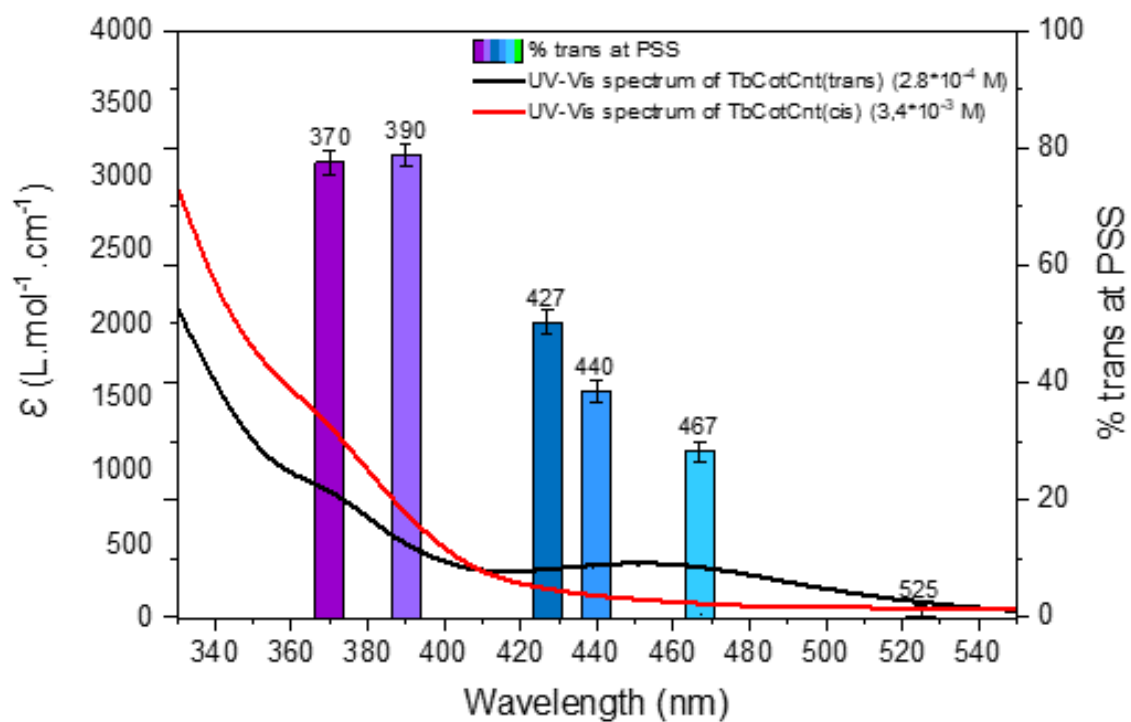

**Figure S80:** Evolution of the trans/cis ratios of 2-Tb under different wavelengths superimposed with UV spectra of the trans isomers

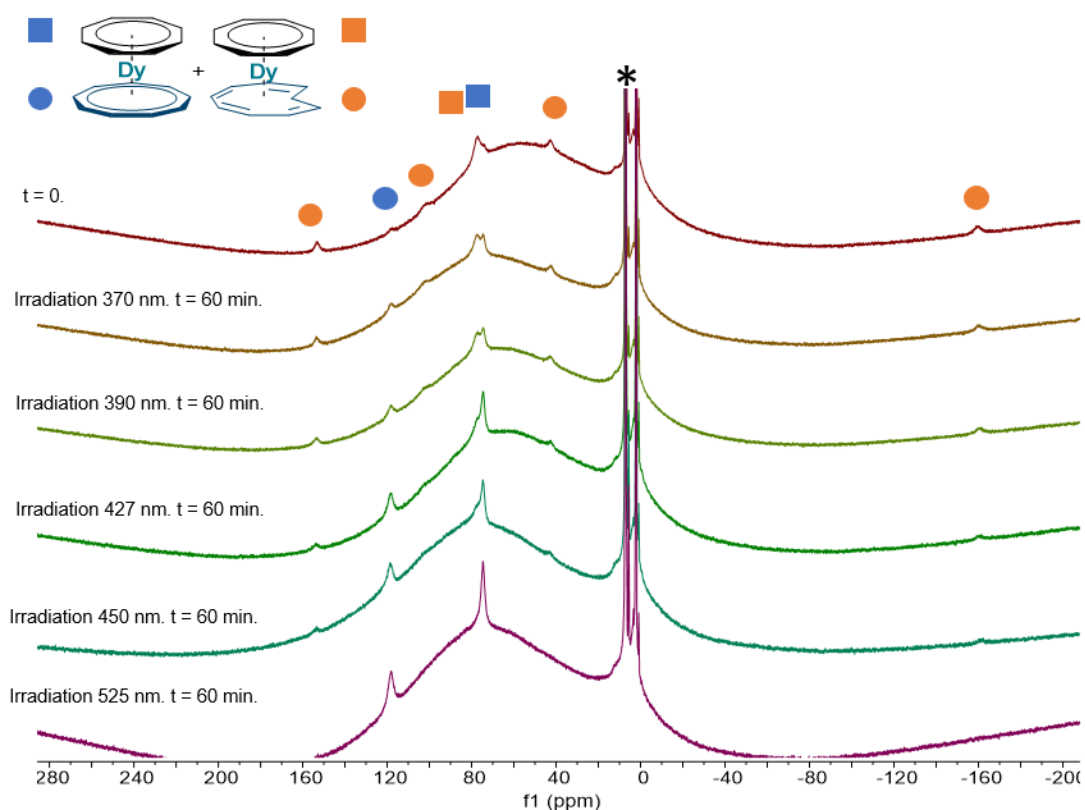

Figure S81: Isomerization study by  $^1\text{H}$  NMR of 2-Dy in toluene- $d_8$  measured at 293 K at different wavelengths (\* residual protio signal of the solvent)

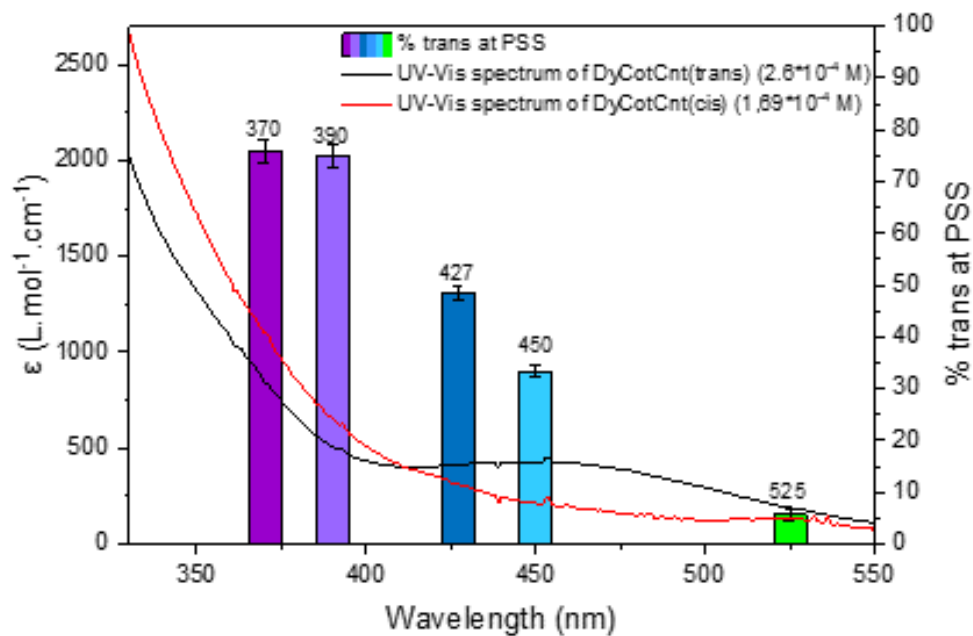

Figure S82: Evolution of the trans/cis ratios of 2-Dy under different wavelengths superimposed with UV spectra of the trans isomers

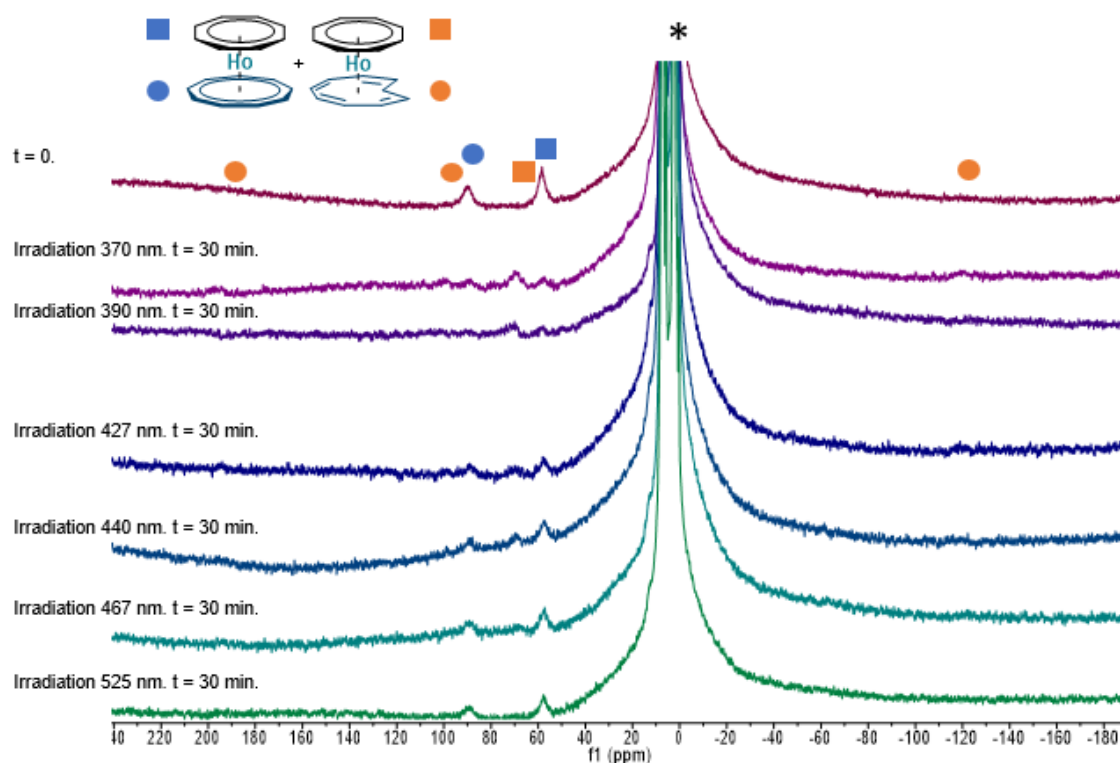

Figure S83: Isomerization study by  $^1\text{H}$  NMR of 2-Ho in  $\text{toluene-}d_8$  measured at 293 K at different wavelengths (\* residual protonic signal of the solvent)

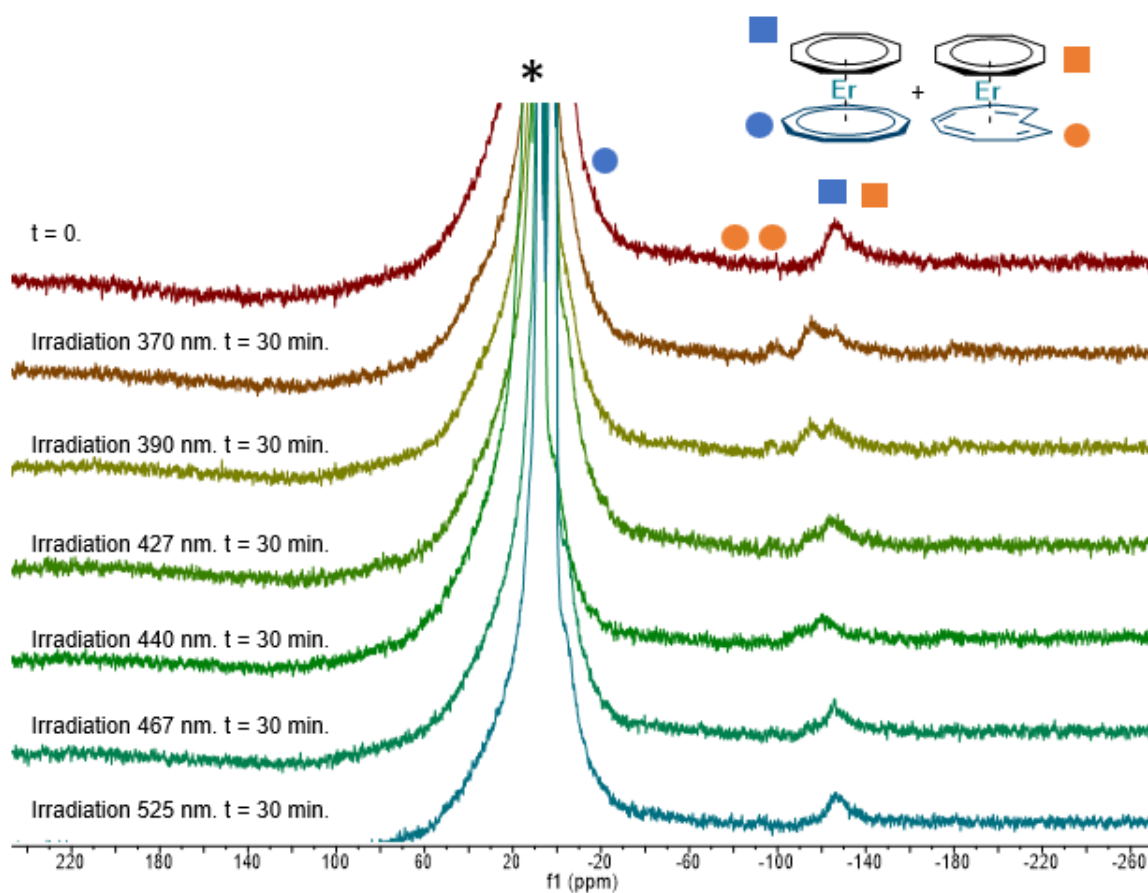

Figure S84: Isomerization study by  $^1\text{H}$  NMR of 2-Er in  $\text{toluene-}d_8$  measured at 293 K at different wavelengths (\* residual protonic signal of the solvent).

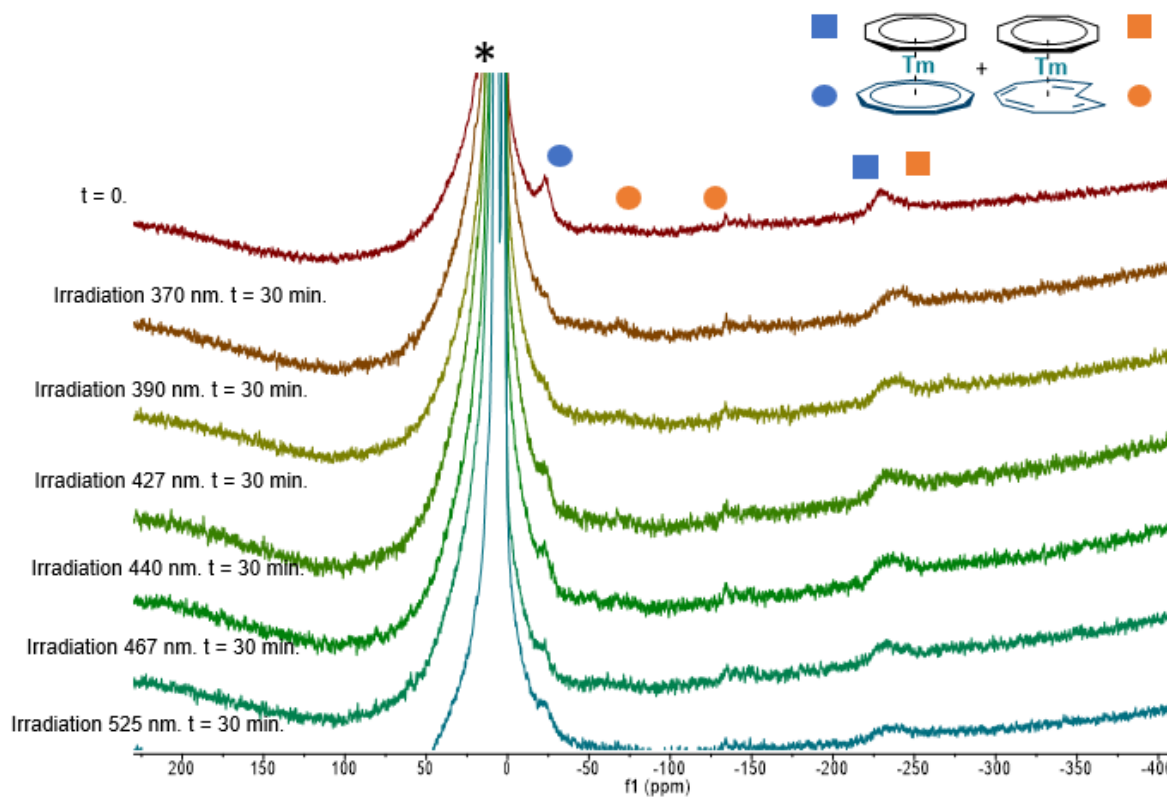

**Figure S85:** Isomerization study by  $^1\text{H}$  NMR of 2-Tm in toluene- $d_8$  measured at 293 K at different wavelengths (\* residual protio signal of the solvent).



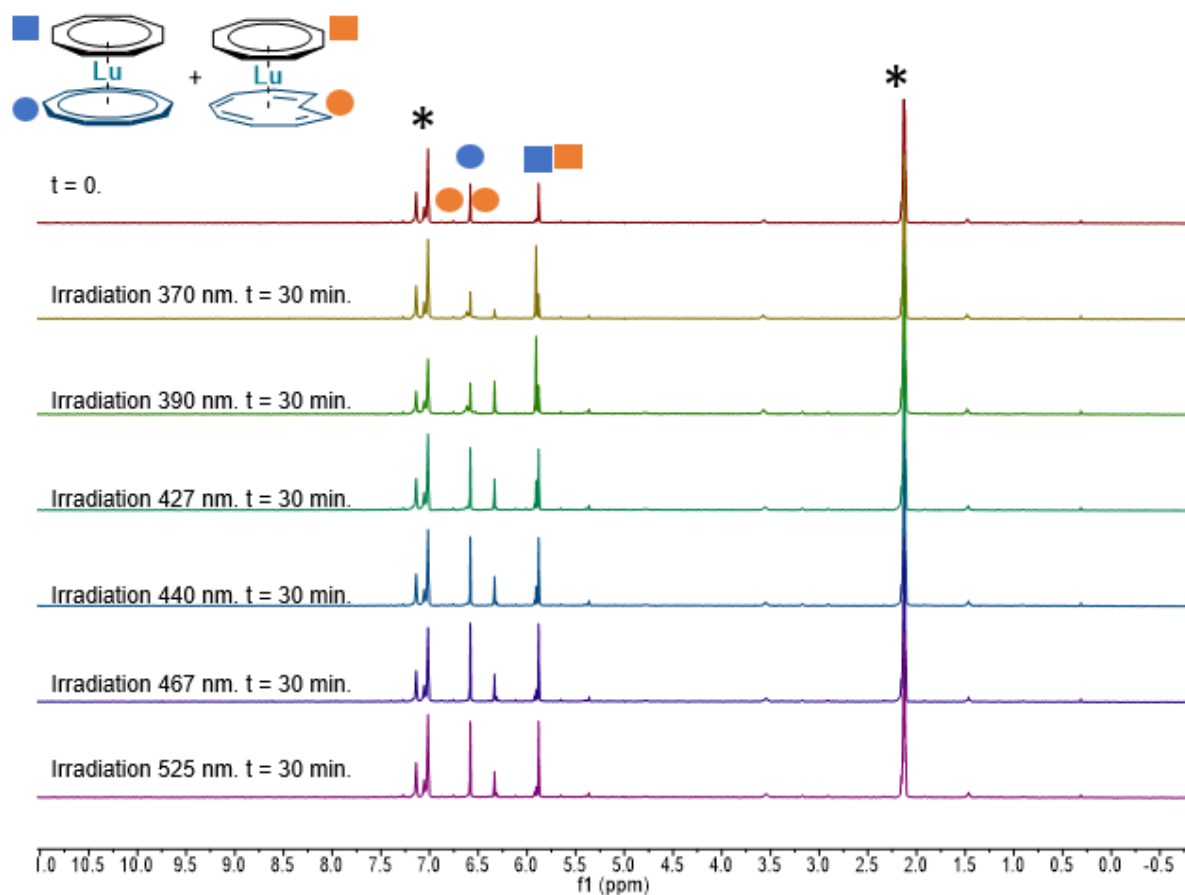

**Figure S86:** Isomerization study by  $^1\text{H}$  NMR of **2-Lu** in  $\text{toluene-}d_8$  measured at 293 K at different wavelengths (\* residual protio signal of the solvent).

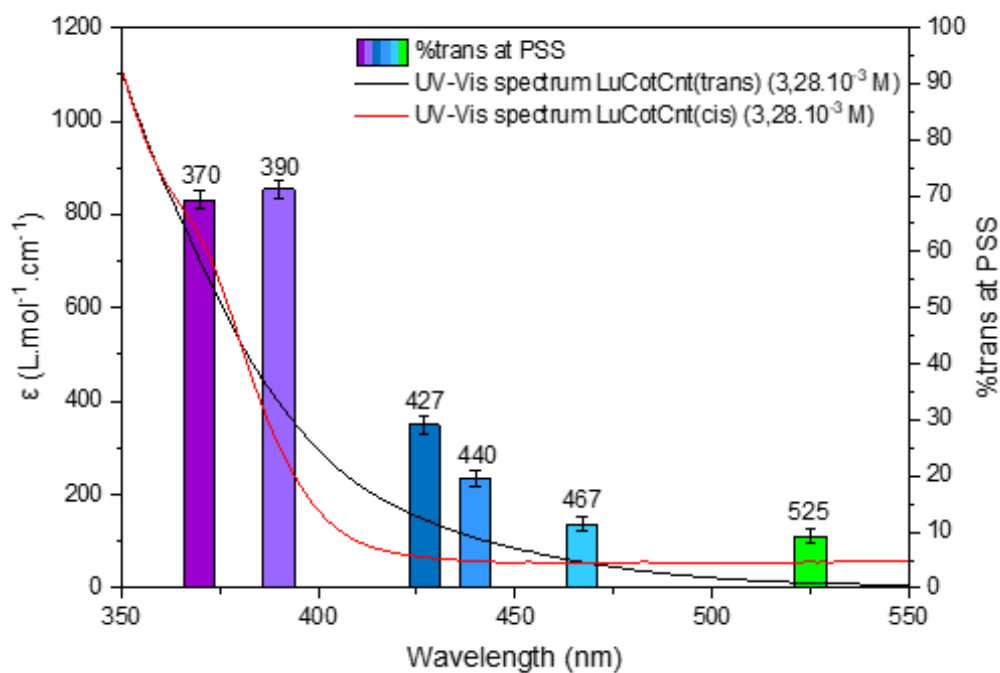

**Figure S87:** Evolution of the *trans/cis* ratios of **2-Lu** under different wavelengths superimposed with UV spectra of the *trans* isomers.



## 8. Computational details

The optimization of reactants, transition states, IRC, and products were carried out by employing DFT hybrid functional (B3PW91)<sup>5</sup> along with small core pseudopotential Stuttgart basis set<sup>6,7</sup> for samarium atom and Pople basis set<sup>8-10</sup> (6-31G\*\*) for the rest of the atoms. Frequency calculations were performed to locate saddle points for transition state structures, minima for the rest of the structures, and for obtaining thermal corrections over the energies. All the calculations were performed using Gaussian 16 suite of programs.<sup>11</sup> Dispersion corrections were accounted for using the GD3-BJ approach.

NCIS calculations were done using the GIAO method.<sup>12-15</sup>

Energetics (kcal/mol) between two isomers of [Sm(C<sub>8</sub>H<sub>8</sub>)(C<sub>9</sub>H<sub>9</sub>)], **2-Sm**

|                  | $\Delta H$ | $\Delta G$ |
|------------------|------------|------------|
| <b>1 (S=5/2)</b> | 6.9        | 4.9        |
| <b>2 (S=5/2)</b> | 0.0        | 0.0        |

Energetics (kcal/mol) between two isomers of [Ce(C<sub>8</sub>H<sub>8</sub>)(C<sub>9</sub>H<sub>9</sub>)], **2-Ce**

|                  | $\Delta H$ | $\Delta G$ |
|------------------|------------|------------|
| <b>3 (S=1/2)</b> | 3.7        | 4.3        |
| <b>4 (S=1/2)</b> | 0.0        | 0.0        |

*Table S24: Selected structural parameters (Dispersion) for 2-Ce-trans.*

|         | Bond distance |
|---------|---------------|
| Ce1-C2  | 2.98          |
| Ce1-C4  | 3.97          |
| Ce1-C6  | 3.00          |
| Ce1-C8  | 2.91          |
| Ce1-C10 | 2.86          |
| Ce1-C11 | 2.66          |
| Ce1-C13 | 2.66          |
| Ce1-C15 | 2.66          |
| Ce1-C17 | 2.67          |
| Ce1-C20 | 2.98          |
| Ce1-C22 | 3.07          |
| Ce1-C24 | 3.00          |
| Ce1-C26 | 2.91          |
| Ce1-C28 | 2.66          |
| Ce1-C30 | 2.66          |
| Ce1-C32 | 2.66          |
| Ce1-C34 | 2.67          |

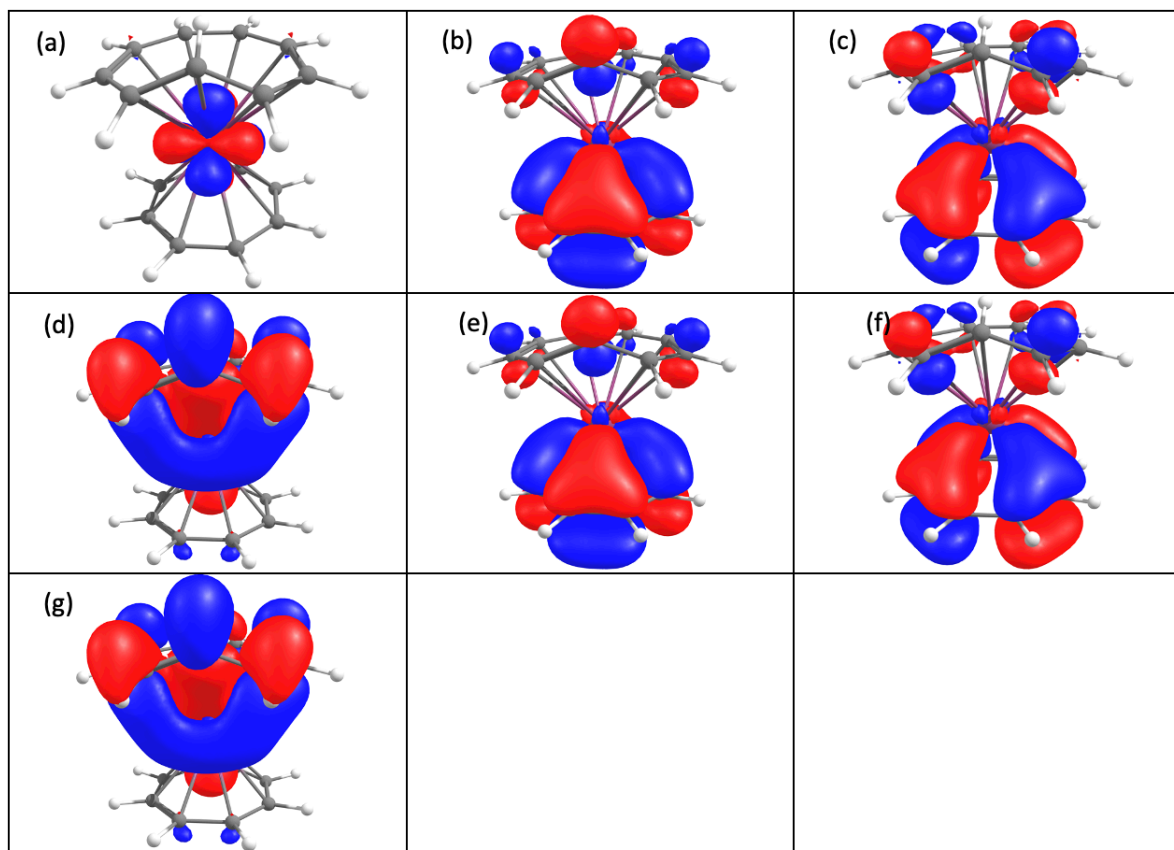

**Figure S88:** Computed MOs for 2-Ce-trans. (a)AMO-HOMO-2 (b)AMO-HOMO-1 (c)AMO-HOMO (d)AMO-LUMO (e)BMO-HOMO-1 (f)BMO-HOMO (g)BMO-LUMO

**Table S25:** Selected structural parameters (Dispersion) for 2-Ce-cis.

|         | Bond distance |
|---------|---------------|
| Ce1-C2  | 3.01          |
| Ce1-C4  | 3.01          |
| Ce1-C6  | 3.02          |
| Ce1-C8  | 3.02          |
| Ce1-C10 | 2.89          |
| Ce1-C12 | 2.89          |
| Ce1-C14 | 2.89          |
| Ce1-C16 | 2.90          |
| Ce1-C18 | 2.89          |
| Ce1-C20 | 2.65          |
| Ce1-C22 | 2.65          |
| Ce1-C24 | 2.65          |
| Ce1-C26 | 2.65          |
| Ce1-C28 | 2.65          |
| Ce1-C30 | 2.65          |

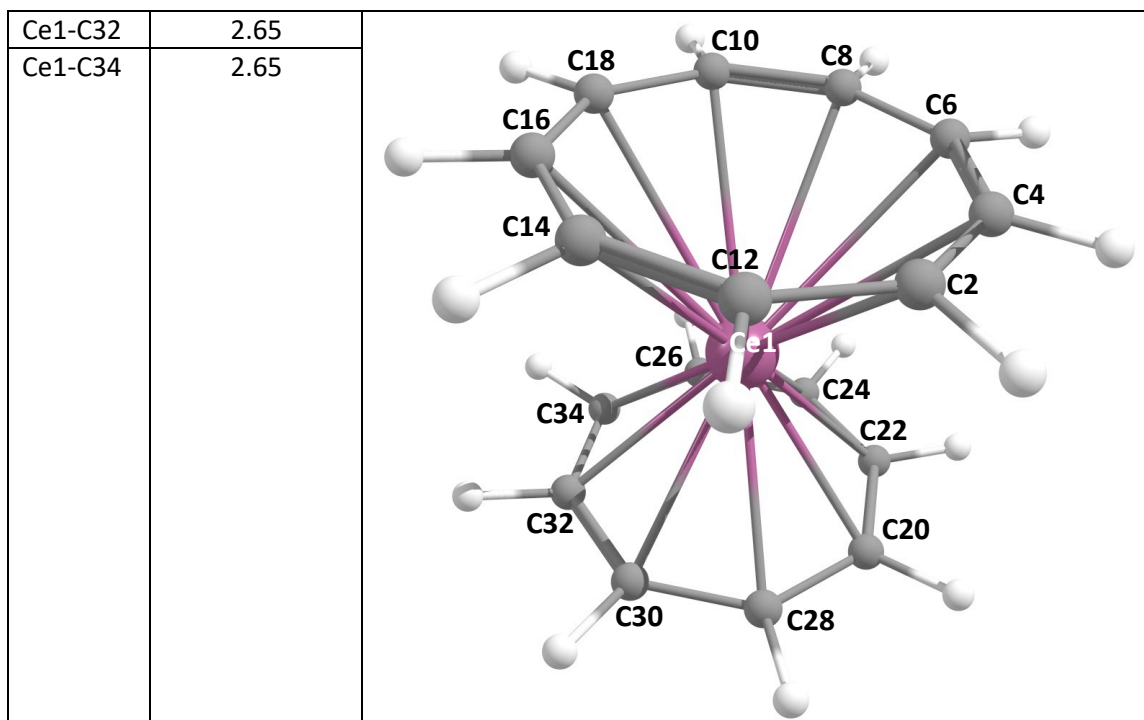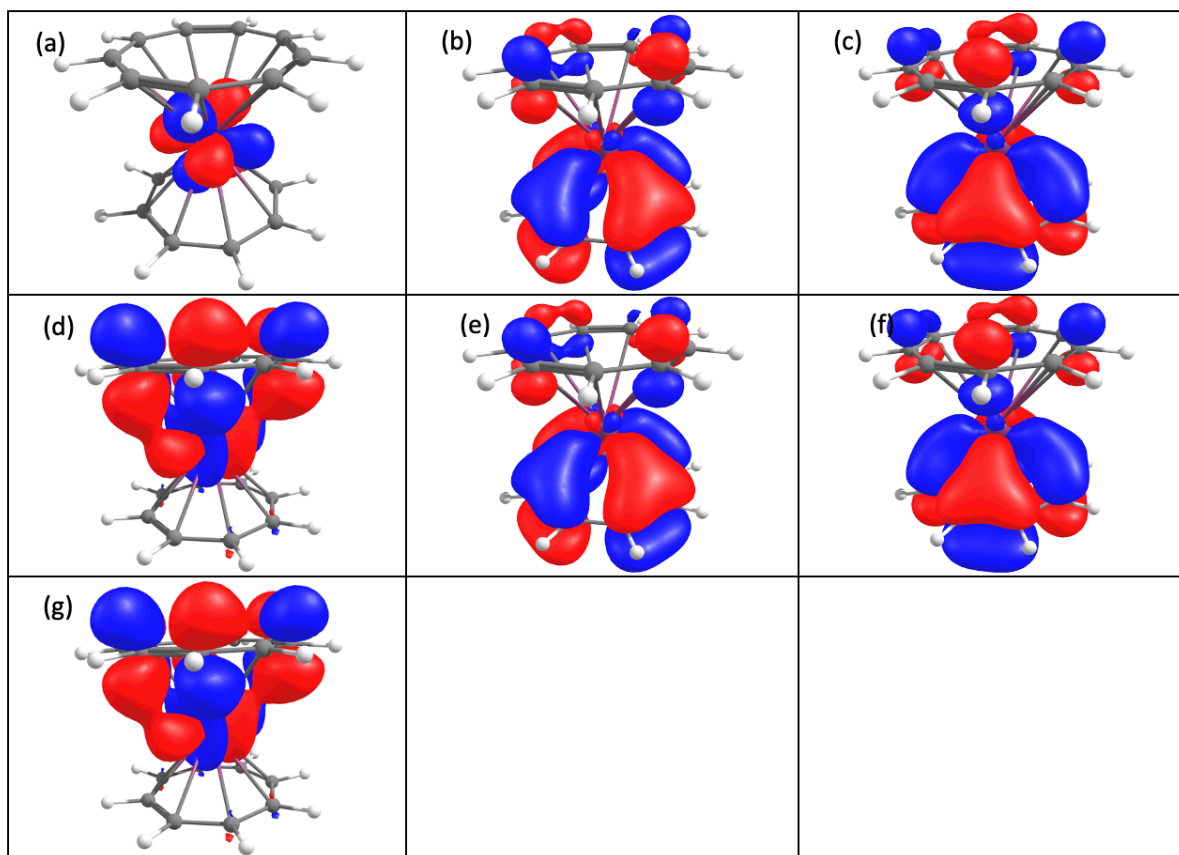

**Figure S89:** Computed MOs for 2-Ce-cis. (a)AMO-HOMO-2 (b)AMO-HOMO-1 (c)AMO-HOMO (d)AMO-LUMO (e)BMO-HOMO-1 (f)BMO-HOMO (g)BMO-LUMO

**Table S26:** Computed natural charges for 2-Ce-trans.

| Atom labels | Natural charges |
|-------------|-----------------|
| Ce1         | 1.36079         |
| C2          | -0.29364        |
| C4          | -0.28918        |
| C6          | -0.33215        |
| C8          | -0.36598        |
| C10         | -0.31992        |
| C11         | -0.37842        |
| C13         | -0.37206        |
| C15         | -0.37218        |
| C17         | -0.37819        |
| C20         | -0.29364        |
| C22         | -0.28918        |
| C24         | -0.33215        |
| C26         | -0.36598        |
| C28         | -0.37842        |
| C30         | -0.37206        |
| C32         | -0.37218        |
| C34         | -0.37819        |

**Table S27:** Computed Wiberg bond index for 2-Ce-trans.

|             |                   |             |                   |             |                   |             |                   |
|-------------|-------------------|-------------|-------------------|-------------|-------------------|-------------|-------------------|
| Atom labels | Wiberg bond index | Atom labels | Wiberg bond index | Atom labels | Wiberg bond index | Atom labels | Wiberg bond index |
| Ce1         | 0.0000            | Ce1         | 0.0000            | Ce1         | 0.0000            | Ce1         | 0.0000            |
| C2          | 0.1055            | C4          | 0.0960            | C6          | 0.1035            | C8          | 0.1097            |
| Atom labels | Wiberg bond index | Atom labels | Wiberg bond index | Atom labels | Wiberg bond index | Atom labels | Wiberg bond index |
| Ce1         | 0.0000            | Ce1         | 0.0000            | Ce1         | 0.0000            | Ce1         | 0.0000            |
| C10         | 0.1277            | C11         | 0.2454            | C13         | 0.2409            | C15         | 0.2388            |
| Atom labels | Wiberg bond index | Atom labels | Wiberg bond index | Atom labels | Wiberg bond index | Atom labels | Wiberg bond index |
| Ce1         | 0.0000            | Ce1         | 0.0000            | Ce1         | 0.0000            | Ce1         | 0.0000            |
| C17         | 0.2422            | C20         | 0.1055            | C22         | 0.0960            | C24         | 0.1035            |
| Atom labels | Wiberg bond index | Atom labels | Wiberg bond index | Atom labels | Wiberg bond index | Atom labels | Wiberg bond index |
| Ce1         | 0.0000            | Ce1         | 0.0000            | Ce1         | 0.0000            | Ce1         | 0.0000            |
| C26         | 0.1097            | C28         | 0.2454            | C30         | 0.2409            | C32         | 0.2388            |
| Atom labels | Wiberg bond index |             |                   |             |                   |             |                   |
| Ce1         | 0.0000            |             |                   |             |                   |             |                   |
| C34         | 0.2422            |             |                   |             |                   |             |                   |

**Table S28:** DFT computed NBO second order perturbation analysis for **2-Ce-trans**.

| Donor NBO                                                                                                                                                            | Acceptor NBO                                                                                 | E(2)<br>kcal/mol |
|----------------------------------------------------------------------------------------------------------------------------------------------------------------------|----------------------------------------------------------------------------------------------|------------------|
| (0.52166) LP ( 1) C 10<br>s( 0.52%)p99.99( 99.45%)d 0.06( 0.03%)                                                                                                     | (0.11692) LV ( 3)Ce 1<br>s( 0.06%)p 3.95( 0.24%)d99.99( 98.98%)f11.35( 0.68%)g 0.73( 0.04%)  | 5.49             |
| (0.52166) LP ( 1) C 10<br>s( 0.52%)p99.99( 99.45%)d 0.06( 0.03%)                                                                                                     | (0.07166) LV ( 5)Ce 1<br>s( 3.03%)p 0.02( 0.05%)d19.39( 58.80%)f12.56( 38.10%)g 0.01( 0.02%) | 13.79            |
| (0.52166) LP ( 1) C 10<br>s( 0.52%)p99.99( 99.45%)d 0.06( 0.03%)                                                                                                     | (0.04854) LV ( 7)Ce 1<br>s( 92.48%)p 0.01( 0.90%)d 0.01( 1.25%)f 0.06( 5.29%)g 0.00( 0.07%)  | 4.43             |
| (0.83169) BD ( 2) C 2- C 4<br>( 49.91%) 0.7065* C 2<br>s( 0.58%)p99.99( 99.35%)d 0.12( 0.07%)<br>( 50.09%) 0.7077* C 4<br>s( 0.31%)p99.99( 99.64%)d 0.16( 0.05%)     | (0.11692) LV ( 3)Ce 1<br>s( 0.06%)p 3.95( 0.24%)d99.99( 98.98%)f11.35( 0.68%)g 0.73( 0.04%)  | 3.00             |
| (0.83169) BD ( 2) C 2- C 4<br>( 49.91%) 0.7065* C 2<br>s( 0.58%)p99.99( 99.35%)d 0.12( 0.07%)<br>( 50.09%) 0.7077* C 4<br>s( 0.31%)p99.99( 99.64%)d 0.16( 0.05%)     | (0.11537) LV ( 4)Ce 1<br>s( 0.00%)p 1.00( 0.17%)d99.99( 98.31%)f 8.37( 1.45%)g 0.40( 0.07%)  | 4.58             |
| (0.98776) BD ( 1) C 2- C 10<br>( 49.37%) 0.7027* C 2 s( 35.12%)p<br>1.85( 64.82%)d 0.00( 0.06%)<br>( 50.63%) 0.7115* C 10 s( 36.72%)p<br>1.72( 63.22%)d 0.00( 0.06%) | (0.11692) LV ( 3)Ce 1<br>s( 0.06%)p 3.95( 0.24%)d99.99( 98.98%)f11.35( 0.68%)g 0.73( 0.04%)  | 2.77             |
| (0.98757) BD ( 1) C 4- C 6<br>( 49.54%) 0.7038* C 4 s( 35.58%)p<br>1.81( 64.36%)d 0.00( 0.07%)<br>( 50.46%) 0.7104* C 6 s( 37.08%)p<br>1.70( 62.86%)d 0.00( 0.06%)   | (0.11537) LV ( 4)Ce 1<br>s( 0.00%)p 1.00( 0.17%)d99.99( 98.31%)f 8.37( 1.45%)g 0.40( 0.07%)  | 2.43             |
| (0.85222) BD ( 2) C 6- C 8<br>( 49.33%) 0.7024* C 6<br>s( 0.40%)p99.99( 99.56%)d 0.09( 0.03%)<br>( 50.67%) 0.7118* C 8<br>s( 0.37%)p99.99( 99.60%)d 0.09( 0.03%)     | (0.11692) LV ( 3)Ce 1<br>s( 0.06%)p 3.95( 0.24%)d99.99( 98.98%)f11.35( 0.68%)g 0.73( 0.04%)  | 3.05             |
| (0.85222) BD ( 2) C 6- C 8<br>( 49.33%) 0.7024* C 6<br>s( 0.40%)p99.99( 99.56%)d 0.09( 0.03%)<br>( 50.67%) 0.7118* C 8<br>s( 0.37%)p99.99( 99.60%)d 0.09( 0.03%)     | (0.11537) LV ( 4)Ce 1<br>s( 0.00%)p 1.00( 0.17%)d99.99( 98.31%)f 8.37( 1.45%)g 0.40( 0.07%)  | 3.60             |
| (0.85222) BD ( 2) C 6- C 8<br>( 49.33%) 0.7024* C 6<br>s( 0.40%)p99.99( 99.56%)d 0.09( 0.03%)<br>( 50.67%) 0.7118* C 8<br>s( 0.37%)p99.99( 99.60%)d 0.09( 0.03%)     | (0.04854) LV ( 7)Ce 1<br>s( 92.48%)p 0.01( 0.90%)d 0.01( 1.25%)f 0.06( 5.29%)g 0.00( 0.07%)  | 2.65             |
| (0.98541) BD ( 1) C 8- C 26<br>( 50.00%) 0.7071* C 8 s( 37.45%)p<br>1.67( 62.49%)d 0.00( 0.06%)                                                                      | (0.11692) LV ( 3)Ce 1<br>s( 0.06%)p 3.95( 0.24%)d99.99( 98.98%)f11.35( 0.68%)g 0.73( 0.04%)  | 3.48             |

|                                                                                                                                                                        |                                                                                                 |      |
|------------------------------------------------------------------------------------------------------------------------------------------------------------------------|-------------------------------------------------------------------------------------------------|------|
| ( 50.00%) 0.7071* C 26 s( 37.45%)p<br>1.67( 62.49%)d 0.00( 0.06%)                                                                                                      |                                                                                                 |      |
| (0.98541) BD ( 1) C 8- C 26<br>( 50.00%) 0.7071* C 8 s( 37.45%)p<br>1.67( 62.49%)d 0.00( 0.06%)<br>( 50.00%) 0.7071* C 26 s( 37.45%)p<br>1.67( 62.49%)d 0.00( 0.06%)   | (0.07166) LV ( 5)Ce 1<br>s( 3.03%)p 0.02( 0.05%)d19.39(<br>58.80%)f12.56( 38.10%)g 0.01( 0.02%) | 2.74 |
| (0.98776) BD ( 1) C 10- C 20<br>( 50.63%) 0.7115* C 10 s( 36.72%)p<br>1.72( 63.22%)d 0.00( 0.06%)<br>( 49.37%) 0.7027* C 20 s( 35.12%)p<br>1.85( 64.82%)d 0.00( 0.06%) | (0.11692) LV ( 3)Ce 1<br>s( 0.06%)p 3.95( 0.24%)d99.99(<br>98.98%)f11.35( 0.68%)g 0.73( 0.04%)  | 2.77 |
| (0.83170) BD ( 2) C 20- C 22<br>( 49.91%) 0.7065* C 20<br>s( 0.58%)p99.99( 99.35%)d 0.12( 0.07%)<br>( 50.09%) 0.7077* C 22<br>s( 0.31%)p99.99( 99.64%)d 0.16( 0.05%)   | (0.11692) LV ( 3)Ce 1<br>s( 0.06%)p 3.95( 0.24%)d99.99(<br>98.98%)f11.35( 0.68%)g 0.73( 0.04%)  | 3.00 |
| (0.83170) BD ( 2) C 20- C 22<br>( 49.91%) 0.7065* C 20<br>s( 0.58%)p99.99( 99.35%)d 0.12( 0.07%)<br>( 50.09%) 0.7077* C 22<br>s( 0.31%)p99.99( 99.64%)d 0.16( 0.05%)   | (0.11537) LV ( 4)Ce 1<br>s( 0.00%)p 1.00( 0.17%)d99.99( 98.31%)f<br>8.37( 1.45%)g 0.40( 0.07%)  | 4.58 |
| (0.98757) BD ( 1) C 22- C 24<br>( 49.54%) 0.7038* C 22 s( 35.58%)p<br>1.81( 64.36%)d 0.00( 0.07%)<br>( 50.46%) 0.7104* C 24 s( 37.08%)p<br>1.70( 62.86%)d 0.00( 0.06%) | (0.11537) LV ( 4)Ce 1<br>s( 0.00%)p 1.00( 0.17%)d99.99( 98.31%)f<br>8.37( 1.45%)g 0.40( 0.07%)  | 2.43 |
| (0.85222) BD ( 2) C 24- C 26<br>( 49.33%) 0.7024* C 24<br>s( 0.40%)p99.99( 99.56%)d 0.09( 0.03%)<br>( 50.67%) 0.7118* C 26<br>s( 0.37%)p99.99( 99.60%)d 0.09( 0.03%)   | (0.11692) LV ( 3)Ce 1<br>s( 0.06%)p 3.95( 0.24%)d99.99(<br>98.98%)f11.35( 0.68%)g 0.73( 0.04%)  | 3.05 |
| (0.85222) BD ( 2) C 24- C 26<br>( 49.33%) 0.7024* C 24<br>s( 0.40%)p99.99( 99.56%)d 0.09( 0.03%)<br>( 50.67%) 0.7118* C 26<br>s( 0.37%)p99.99( 99.60%)d 0.09( 0.03%)   | (0.11537) LV ( 4)Ce 1<br>s( 0.00%)p 1.00( 0.17%)d99.99( 98.31%)f<br>8.37( 1.45%)g 0.40( 0.07%)  | 3.60 |
| (0.85222) BD ( 2) C 24- C 26<br>( 49.33%) 0.7024* C 24<br>s( 0.40%)p99.99( 99.56%)d 0.09( 0.03%)<br>( 50.67%) 0.7118* C 26<br>s( 0.37%)p99.99( 99.60%)d 0.09( 0.03%)   | (0.04854) LV ( 7)Ce 1<br>s( 92.48%)p 0.01( 0.90%)d 0.01( 1.25%)f<br>0.06( 5.29%)g 0.00( 0.07%)  | 2.65 |
| (0.97962) BD ( 1) C 11- C 13<br>( 50.09%) 0.7078* C 11 s( 35.29%)p<br>1.83( 64.65%)d 0.00( 0.06%)<br>( 49.91%) 0.7065* C 13 s( 35.38%)p<br>1.82( 64.55%)d 0.00( 0.06%) | (0.11692) LV ( 3)Ce 1<br>s( 0.06%)p 3.95( 0.24%)d99.99(<br>98.98%)f11.35( 0.68%)g 0.73( 0.04%)  | 4.53 |
| (0.97962) BD ( 1) C 11- C 13<br>( 50.09%) 0.7078* C 11 s( 35.29%)p<br>1.83( 64.65%)d 0.00( 0.06%)                                                                      | (0.11537) LV ( 4)Ce 1<br>s( 0.00%)p 1.00( 0.17%)d99.99( 98.31%)f<br>8.37( 1.45%)g 0.40( 0.07%)  | 4.91 |

|                                                                                                                                                                        |                                                                                                |       |
|------------------------------------------------------------------------------------------------------------------------------------------------------------------------|------------------------------------------------------------------------------------------------|-------|
| ( 49.91%) 0.7065* C 13 s( 35.38%)p<br>1.82( 64.55%)d 0.00( 0.06%)                                                                                                      |                                                                                                |       |
| (0.85428) BD ( 2) C 11- C 13<br>( 49.87%) 0.7062* C 11<br>s( 1.47%)p66.94( 98.47%)d 0.04( 0.06%)<br>( 50.13%) 0.7080* C 13<br>s( 1.42%)p69.36( 98.52%)d 0.04( 0.06%)   | (0.19683) LV ( 2)Ce 1<br>s( 0.00%)p 0.00( 0.00%)d 1.00( 90.71%)f<br>0.10( 9.24%)g 0.00( 0.05%) | 7.67  |
| (0.85428) BD ( 2) C 11- C 13<br>( 49.87%) 0.7062* C 11<br>s( 1.47%)p66.94( 98.47%)d 0.04( 0.06%)<br>( 50.13%) 0.7080* C 13<br>s( 1.42%)p69.36( 98.52%)d 0.04( 0.06%)   | (0.11692) LV ( 3)Ce 1<br>s( 0.06%)p 3.95( 0.24%)d99.99( 98.98%)f11.35( 0.68%)g 0.73( 0.04%)    | 5.84  |
| (0.85428) BD ( 2) C 11- C 13<br>( 49.87%) 0.7062* C 11<br>s( 1.47%)p66.94( 98.47%)d 0.04( 0.06%)<br>( 50.13%) 0.7080* C 13<br>s( 1.42%)p69.36( 98.52%)d 0.04( 0.06%)   | (0.11537) LV ( 4)Ce 1<br>s( 0.00%)p 1.00( 0.17%)d99.99( 98.31%)f<br>8.37( 1.45%)g 0.40( 0.07%) | 6.97  |
| (0.85428) BD ( 2) C 11- C 13<br>( 49.87%) 0.7062* C 11<br>s( 1.47%)p66.94( 98.47%)d 0.04( 0.06%)<br>( 50.13%) 0.7080* C 13<br>s( 1.42%)p69.36( 98.52%)d 0.04( 0.06%)   | (0.04854) LV ( 7)Ce 1<br>s( 92.48%)p 0.01( 0.90%)d 0.01( 1.25%)f<br>0.06( 5.29%)g 0.00( 0.07%) | 3.63  |
| (0.97768) BD ( 1) C 11- C 28<br>( 50.00%) 0.7071* C 11 s( 36.66%)p<br>1.73( 63.28%)d 0.00( 0.06%)<br>( 50.00%) 0.7071* C 28 s( 36.66%)p<br>1.73( 63.28%)d 0.00( 0.06%) | (0.11692) LV ( 3)Ce 1<br>s( 0.06%)p 3.95( 0.24%)d99.99( 98.98%)f11.35( 0.68%)g 0.73( 0.04%)    | 10.45 |
| (0.97768) BD ( 1) C 11- C 28<br>( 50.00%) 0.7071* C 11 s( 36.66%)p<br>1.73( 63.28%)d 0.00( 0.06%)<br>( 50.00%) 0.7071* C 28 s( 36.66%)p<br>1.73( 63.28%)d 0.00( 0.06%) | (0.04854) LV ( 7)Ce 1<br>s( 92.48%)p 0.01( 0.90%)d 0.01( 1.25%)f<br>0.06( 5.29%)g 0.00( 0.07%) | 2.78  |
| (0.97749) BD ( 1) C 13- C 15<br>( 50.03%) 0.7073* C 13 s( 36.84%)p<br>1.71( 63.10%)d 0.00( 0.06%)<br>( 49.97%) 0.7069* C 15 s( 36.77%)p<br>1.72( 63.16%)d 0.00( 0.07%) | (0.11537) LV ( 4)Ce 1<br>s( 0.00%)p 1.00( 0.17%)d99.99( 98.31%)f<br>8.37( 1.45%)g 0.40( 0.07%) | 11.16 |
| (0.97749) BD ( 1) C 13- C 15<br>( 50.03%) 0.7073* C 13 s( 36.84%)p<br>1.71( 63.10%)d 0.00( 0.06%)<br>( 49.97%) 0.7069* C 15 s( 36.77%)p<br>1.72( 63.16%)d 0.00( 0.07%) | (0.04854) LV ( 7)Ce 1<br>s( 92.48%)p 0.01( 0.90%)d 0.01( 1.25%)f<br>0.06( 5.29%)g 0.00( 0.07%) | 2.67  |
| (0.97994) BD ( 1) C 15- C 17<br>( 49.95%) 0.7067* C 15 s( 35.42%)p<br>1.82( 64.52%)d 0.00( 0.06%)<br>( 50.05%) 0.7075* C 17 s( 35.32%)p<br>1.83( 64.61%)d 0.00( 0.06%) | (0.11692) LV ( 3)Ce 1<br>s( 0.06%)p 3.95( 0.24%)d99.99( 98.98%)f11.35( 0.68%)g 0.73( 0.04%)    | 5.11  |
| (0.97994) BD ( 1) C 15- C 17<br>( 49.95%) 0.7067* C 15 s( 35.42%)p<br>1.82( 64.52%)d 0.00( 0.06%)                                                                      | (0.11537) LV ( 4)Ce 1<br>s( 0.00%)p 1.00( 0.17%)d99.99( 98.31%)f<br>8.37( 1.45%)g 0.40( 0.07%) | 4.85  |

|                                                                                                                                                                        |                                                                                                |       |
|------------------------------------------------------------------------------------------------------------------------------------------------------------------------|------------------------------------------------------------------------------------------------|-------|
| ( 50.05%) 0.7075* C 17 s( 35.32%)p<br>1.83( 64.61%)d 0.00( 0.06%)                                                                                                      |                                                                                                |       |
| (0.97994) BD ( 1) C 15- C 17<br>( 49.95%) 0.7067* C 15 s( 35.42%)p<br>1.82( 64.52%)d 0.00( 0.06%)<br>( 50.05%) 0.7075* C 17 s( 35.32%)p<br>1.83( 64.61%)d 0.00( 0.06%) | (0.04854) LV ( 7)Ce 1<br>s( 92.48%)p 0.01( 0.90%)d 0.01( 1.25%)f<br>0.06( 5.29%)g 0.00( 0.07%) | 2.34  |
| (0.85292) BD ( 2) C 15- C 17<br>( 49.82%) 0.7059* C 15<br>s( 1.41%)p69.96( 98.53%)d 0.04( 0.06%)<br>( 50.18%) 0.7084* C 17<br>s( 1.40%)p70.43( 98.54%)d 0.04( 0.06%)   | (0.19683) LV ( 2)Ce 1<br>s( 0.00%)p 0.00( 0.00%)d 1.00( 90.71%)f<br>0.10( 9.24%)g 0.00( 0.05%) | 8.50  |
| (0.85292) BD ( 2) C 15- C 17<br>( 49.82%) 0.7059* C 15<br>s( 1.41%)p69.96( 98.53%)d 0.04( 0.06%)<br>( 50.18%) 0.7084* C 17<br>s( 1.40%)p70.43( 98.54%)d 0.04( 0.06%)   | (0.11692) LV ( 3)Ce 1<br>s( 0.06%)p 3.95( 0.24%)d99.99( 98.98%)f11.35( 0.68%)g 0.73( 0.04%)    | 6.75  |
| (0.85292) BD ( 2) C 15- C 17<br>( 49.82%) 0.7059* C 15<br>s( 1.41%)p69.96( 98.53%)d 0.04( 0.06%)<br>( 50.18%) 0.7084* C 17<br>s( 1.40%)p70.43( 98.54%)d 0.04( 0.06%)   | (0.11537) LV ( 4)Ce 1<br>s( 0.00%)p 1.00( 0.17%)d99.99( 98.31%)f<br>8.37( 1.45%)g 0.40( 0.07%) | 6.98  |
| (0.85292) BD ( 2) C 15- C 17<br>( 49.82%) 0.7059* C 15<br>s( 1.41%)p69.96( 98.53%)d 0.04( 0.06%)<br>( 50.18%) 0.7084* C 17<br>s( 1.40%)p70.43( 98.54%)d 0.04( 0.06%)   | (0.04854) LV ( 7)Ce 1<br>s( 92.48%)p 0.01( 0.90%)d 0.01( 1.25%)f<br>0.06( 5.29%)g 0.00( 0.07%) | 4.00  |
| (0.97823) BD ( 1) C 17- C 34<br>( 50.00%) 0.7071* C 17 s( 36.71%)p<br>1.72( 63.23%)d 0.00( 0.06%)<br>( 50.00%) 0.7071* C 34 s( 36.71%)p<br>1.72( 63.23%)d 0.00( 0.06%) | (0.11692) LV ( 3)Ce 1<br>s( 0.06%)p 3.95( 0.24%)d99.99( 98.98%)f11.35( 0.68%)g 0.73( 0.04%)    | 11.43 |
| (0.97823) BD ( 1) C 17- C 34<br>( 50.00%) 0.7071* C 17 s( 36.71%)p<br>1.72( 63.23%)d 0.00( 0.06%)<br>( 50.00%) 0.7071* C 34 s( 36.71%)p<br>1.72( 63.23%)d 0.00( 0.06%) |                                                                                                |       |
| (0.97962) BD ( 1) C 28- C 30<br>( 50.09%) 0.7078* C 28 s( 35.29%)p<br>1.83( 64.65%)d 0.00( 0.06%)<br>( 49.91%) 0.7065* C 30 s( 35.38%)p<br>1.82( 64.55%)d 0.00( 0.06%) | (0.11692) LV ( 3)Ce 1<br>s( 0.06%)p 3.95( 0.24%)d99.99( 98.98%)f11.35( 0.68%)g 0.73( 0.04%)    | 4.53  |
| (0.97962) BD ( 1) C 28- C 30<br>( 50.09%) 0.7078* C 28 s( 35.29%)p<br>1.83( 64.65%)d 0.00( 0.06%)<br>( 49.91%) 0.7065* C 30 s( 35.38%)p<br>1.82( 64.55%)d 0.00( 0.06%) | (0.11537) LV ( 4)Ce 1<br>s( 0.00%)p 1.00( 0.17%)d99.99( 98.31%)f<br>8.37( 1.45%)g 0.40( 0.07%) | 4.92  |
| (0.85428) BD ( 2) C 28- C 30<br>( 49.87%) 0.7062* C 28<br>s( 1.47%)p66.94( 98.47%)d 0.04( 0.06%)                                                                       | (0.19683) LV ( 2)Ce 1<br>s( 0.00%)p 0.00( 0.00%)d 1.00( 90.71%)f<br>0.10( 9.24%)g 0.00( 0.05%) | 7.67  |



|                                                                                                                                                                      |                                                                                             |       |
|----------------------------------------------------------------------------------------------------------------------------------------------------------------------|---------------------------------------------------------------------------------------------|-------|
| ( 50.13%) 0.7080* C 30<br>s( 1.42%)p69.36( 98.52%)d 0.04( 0.06%)                                                                                                     |                                                                                             |       |
| (0.85428) BD ( 2) C 28- C 30<br>( 49.87%) 0.7062* C 28<br>s( 1.47%)p66.94( 98.47%)d 0.04( 0.06%)<br>( 50.13%) 0.7080* C 30<br>s( 1.42%)p69.36( 98.52%)d 0.04( 0.06%) | (0.11692) LV ( 3)Ce 1<br>s( 0.06%)p 3.95( 0.24%)d99.99( 98.98%)f11.35( 0.68%)g 0.73( 0.04%) | 5.84  |
| (0.85428) BD ( 2) C 28- C 30<br>( 49.87%) 0.7062* C 28<br>s( 1.47%)p66.94( 98.47%)d 0.04( 0.06%)<br>( 50.13%) 0.7080* C 30<br>s( 1.42%)p69.36( 98.52%)d 0.04( 0.06%) | (0.11537) LV ( 4)Ce 1<br>s( 0.00%)p 1.00( 0.17%)d99.99( 98.31%)f 8.37( 1.45%)g 0.40( 0.07%) | 6.97  |
| (0.85428) BD ( 2) C 28- C 30<br>( 49.87%) 0.7062* C 28<br>s( 1.47%)p66.94( 98.47%)d 0.04( 0.06%)<br>( 50.13%) 0.7080* C 30<br>s( 1.42%)p69.36( 98.52%)d 0.04( 0.06%) | (0.04854) LV ( 7)Ce 1<br>s( 92.48%)p 0.01( 0.90%)d 0.01( 1.25%)f 0.06( 5.29%)g 0.00( 0.07%) | 3.63  |
| (0.97749) BD ( 1) C 30- C 32<br>( 50.03%) 0.7073* C 30 s( 36.84%)p 1.71( 63.10%)d 0.00( 0.06%)<br>( 49.97%) 0.7069* C 32 s( 36.77%)p 1.72( 63.16%)d 0.00( 0.07%)     | (0.11537) LV ( 4)Ce 1<br>s( 0.00%)p 1.00( 0.17%)d99.99( 98.31%)f 8.37( 1.45%)g 0.40( 0.07%) | 11.16 |
| (0.97994) BD ( 1) C 32- C 34<br>( 49.95%) 0.7067* C 32 s( 35.42%)p 1.82( 64.52%)d 0.00( 0.06%)<br>( 50.05%) 0.7075* C 34 s( 35.32%)p 1.83( 64.61%)d 0.00( 0.06%)     | (0.11692) LV ( 3)Ce 1<br>s( 0.06%)p 3.95( 0.24%)d99.99( 98.98%)f11.35( 0.68%)g 0.73( 0.04%) | 5.11  |
| (0.97994) BD ( 1) C 32- C 34<br>( 49.95%) 0.7067* C 32 s( 35.42%)p 1.82( 64.52%)d 0.00( 0.06%)<br>( 50.05%) 0.7075* C 34 s( 35.32%)p 1.83( 64.61%)d 0.00( 0.06%)     | (0.11537) LV ( 4)Ce 1<br>s( 0.00%)p 1.00( 0.17%)d99.99( 98.31%)f 8.37( 1.45%)g 0.40( 0.07%) | 4.84  |
| (0.85292) BD ( 2) C 32- C 34<br>( 49.82%) 0.7059* C 32<br>s( 1.41%)p69.96( 98.53%)d 0.04( 0.06%)<br>( 50.18%) 0.7084* C 34<br>s( 1.40%)p70.43( 98.54%)d 0.04( 0.06%) | (0.19683) LV ( 2)Ce 1<br>s( 0.00%)p 0.00( 0.00%)d 1.00( 90.71%)f 0.10( 9.24%)g 0.00( 0.05%) | 8.50  |
| (0.85292) BD ( 2) C 32- C 34<br>( 49.82%) 0.7059* C 32<br>s( 1.41%)p69.96( 98.53%)d 0.04( 0.06%)<br>( 50.18%) 0.7084* C 34<br>s( 1.40%)p70.43( 98.54%)d 0.04( 0.06%) | (0.11692) LV ( 3)Ce 1<br>s( 0.06%)p 3.95( 0.24%)d99.99( 98.98%)f11.35( 0.68%)g 0.73( 0.04%) | 6.75  |
| (0.85292) BD ( 2) C 32- C 34<br>( 49.82%) 0.7059* C 32<br>s( 1.41%)p69.96( 98.53%)d 0.04( 0.06%)<br>( 50.18%) 0.7084* C 34<br>s( 1.40%)p70.43( 98.54%)d 0.04( 0.06%) | (0.11537) LV ( 4)Ce 1<br>s( 0.00%)p 1.00( 0.17%)d99.99( 98.31%)f 8.37( 1.45%)g 0.40( 0.07%) | 6.97  |
| (0.85292) BD ( 2) C 32- C 34<br>( 49.82%) 0.7059* C 32<br>s( 1.41%)p69.96( 98.53%)d 0.04( 0.06%)                                                                     | (0.04854) LV ( 7)Ce 1<br>s( 92.48%)p 0.01( 0.90%)d 0.01( 1.25%)f 0.06( 5.29%)g 0.00( 0.07%) | 4.00  |

|                                                                  |  |  |
|------------------------------------------------------------------|--|--|
| ( 50.18%) 0.7084* C 34<br>s( 1.40%)p70.43( 98.54%)d 0.04( 0.06%) |  |  |
|------------------------------------------------------------------|--|--|

Table S29: NBO analysis of canonical molecular orbitals for 2-Sm-trans.

|                                                                                                                                                                                                                                        |                                                                                                                                                                                                                                                                                                                                                                                                                                                                                                                                                                                                                                                                                                                                                                              |
|----------------------------------------------------------------------------------------------------------------------------------------------------------------------------------------------------------------------------------------|------------------------------------------------------------------------------------------------------------------------------------------------------------------------------------------------------------------------------------------------------------------------------------------------------------------------------------------------------------------------------------------------------------------------------------------------------------------------------------------------------------------------------------------------------------------------------------------------------------------------------------------------------------------------------------------------------------------------------------------------------------------------------|
| HOMO-2, MO 73 (occ): orbital energy = -0.19354 a.u.<br>0.983*[ 31]: LP ( 1)Ce 1(lp)                                                                                                                                                    | (0.98653) LP ( 1)Ce 1<br>s( 0.01%)p 0.16( 0.00%)d15.14( 0.22%) f99.99( 99.76%)g<br>0.04( 0.00%)                                                                                                                                                                                                                                                                                                                                                                                                                                                                                                                                                                                                                                                                              |
| HOMO-1, MO 74 (occ): orbital energy = -0.18388 a.u.<br>-0.423*[127]: BD*( 2) C32-<br>C34*<br>-0.423*[108]: BD*( 2) C15-<br>C17*<br>0.422*[122]: BD*( 2) C28-<br>C30*<br>0.422*[ 75]: BD*( 2) C11- C13*<br>0.329*[ 76]: LV ( 1)Ce 1(lv) | (0.27020) BD*( 2) C 32- C 34<br>( 50.18%) 0.7084* C 32 s( 1.41%)p69.96( 98.53%)d 0.04( 0.06%)<br>( 49.82%) -0.7059* C 34 s( 1.40%)p70.43( 98.54%)d 0.04( 0.06%)<br>(0.27020) BD*( 2) C 15- C 17<br>( 50.18%) 0.7084* C 15 s( 1.41%)p69.96( 98.53%)d 0.04( 0.06%)<br>( 49.82%) -0.7059* C 17 s( 1.40%)p70.43( 98.54%)d 0.04( 0.06%)<br>(0.27043) BD*( 2) C 28- C 30<br>( 50.13%) 0.7080* C 28 s( 1.47%)p66.94( 98.47%)d 0.04( 0.06%)<br>( 49.87%) -0.7062* C 30 s( 1.42%)p69.36( 98.52%)d 0.04( 0.06%)<br>(0.27043) BD*( 2) C 11- C 13<br>( 50.13%) 0.7080* C 11 s( 1.47%)p66.94( 98.47%)d 0.04( 0.06%)<br>( 49.87%) -0.7062* C 13 s( 1.42%)p69.36( 98.52%)d 0.04( 0.06%)<br>(0.19843) LV ( 1)Ce 1<br>s( 0.01%)p 0.06( 0.00%)d99.99( 89.61%) f99.99( 10.33%)g<br>3.87( 0.05%) |
| HOMO, MO 75 (occ): orbital energy = -0.18307 a.u.<br>-0.421*[ 73]: BD ( 2) C32- C34<br>0.421*[ 54]: BD ( 2) C15- C17<br>0.421*[ 68]: BD ( 2) C28- C30<br>-0.421*[ 48]: BD ( 2) C11- C13<br>0.315*[ 77]: LV ( 2)Ce 1(lv)                | (0.85292) BD ( 2) C 32- C 34<br>( 49.82%) 0.7059* C 32 s( 1.41%)p69.96( 98.53%)d<br>0.04( 0.06%)<br>( 50.18%) 0.7084* C 34 s( 1.40%)p70.43( 98.54%)d 0.04( 0.06%)<br>(0.85292) BD ( 2) C 15- C 17<br>( 49.82%) 0.7059* C 15 s( 1.41%)p69.96( 98.53%)d<br>0.04( 0.06%)<br>( 50.18%) 0.7084* C 17 s( 1.40%)p70.43( 98.54%)d 0.04( 0.06%)<br>(0.85428) BD ( 2) C 28- C 30<br>( 49.87%) 0.7062* C 28 s( 1.47%)p66.94( 98.47%)d<br>0.04( 0.06%)<br>( 50.13%) 0.7080* C 30 s( 1.42%)p69.36( 98.52%)d 0.04( 0.06%)<br>(0.85428) BD ( 2) C 11- C 13<br>( 49.87%) 0.7062* C 11 s( 1.47%)p66.94( 98.47%)d<br>0.04( 0.06%)<br>( 50.13%) 0.7080* C 13 s( 1.42%)p69.36( 98.52%)d 0.04( 0.06%)<br>(0.19683) LV ( 2)Ce 1                                                                    |

|  |                                                                     |
|--|---------------------------------------------------------------------|
|  | s( 0.00%)p 0.00( 0.00%)d 1.00( 90.71%) f 0.10( 9.24%)g 0.00( 0.05%) |
|--|---------------------------------------------------------------------|

**Table S30:** Computed natural charges for 2-Ce-cis.

| Atom labels | Natural charges |
|-------------|-----------------|
| Ce1         | 1.41772         |
| C2          | -0.32989        |
| C4          | -0.32459        |
| C6          | -0.32283        |
| C8          | -0.32257        |
| C10         | -0.32787        |
| C12         | -0.32459        |
| C14         | -0.32283        |
| C16         | -0.32257        |
| C18         | -0.32787        |
| C20         | -0.37885        |
| C22         | -0.37291        |
| C24         | -0.37293        |
| C26         | -0.37875        |
| C28         | -0.37885        |
| C30         | -0.37291        |
| C32         | -0.37292        |
| C34         | -0.37875        |

**Table S31:** Computed Wiberg bond index for 2-Ce-cis.

|             |                   |             |                   |             |                   |             |                   |
|-------------|-------------------|-------------|-------------------|-------------|-------------------|-------------|-------------------|
| Atom labels | Wiberg bond index | Atom labels | Wiberg bond index | Atom labels | Wiberg bond index | Atom labels | Wiberg bond index |
| Ce1         | 0.0000            | Ce1         | 0.0000            | Ce1         | 0.0000            | Ce1         | 0.0000            |
| C2          | 0.0918            | C4          | 0.0915            | C6          | 0.0912            | C8          | 0.0912            |
| Atom labels | Wiberg bond index | Atom labels | Wiberg bond index | Atom labels | Wiberg bond index | Atom labels | Wiberg bond index |
| Ce1         | 0.0000            | Ce1         | 0.0000            | Ce1         | 0.0000            | Ce1         | 0.0000            |
| C10         | 0.0918            | C12         | 0.0915            | C14         | 0.0912            | C16         | 0.0912            |
| Atom labels | Wiberg bond index | Atom labels | Wiberg bond index | Atom labels | Wiberg bond index | Atom labels | Wiberg bond index |
| Ce1         | 0.0000            | Ce1         | 0.0000            | Ce1         | 0.0000            | Ce1         | 0.0000            |
| C18         | 0.0918            | C20         | 0.2433            | C22         | 0.2423            | C24         | 0.2423            |
| Atom labels | Wiberg bond index | Atom labels | Wiberg bond index | Atom labels | Wiberg bond index | Atom labels | Wiberg bond index |
| Ce1         | 0.0000            | Ce1         | 0.0000            | Ce1         | 0.0000            | Ce1         | 0.0000            |
| C26         | 0.2434            | C28         | 0.2433            | C30         | 0.2423            | C32         | 0.2423            |
| Atom labels | Wiberg bond index |             |                   |             |                   |             |                   |
| Ce1         | 0.0000            |             |                   |             |                   |             |                   |
| C34         | 0.2434            |             |                   |             |                   |             |                   |

Table S32: DFT computed NBO second-order perturbation analysis for 2-Ce-cis.

| Donor NBO                                                                                                                                                        | Acceptor NBO                                                                                   | E(2)<br>kcal/mol |
|------------------------------------------------------------------------------------------------------------------------------------------------------------------|------------------------------------------------------------------------------------------------|------------------|
| (0.53224) LP ( 1) C 6<br>s( 0.38%)p99.99( 99.60%)d 0.04( 0.01%)                                                                                                  | (0.11283) LV ( 4)Ce 1<br>s( 0.00%)p 1.00( 0.21%)d99.99( 98.18%)f<br>7.40( 1.57%)g 0.20( 0.04%) | 4.24             |
| (0.84389) BD ( 2) C 2- C 4<br>( 50.03%) 0.7073* C 2 s( 0.15%)p99.99( 99.82%)d 0.21( 0.03%)<br>( 49.97%) 0.7069* C 4 s( 0.15%)p99.99( 99.82%)d 0.22( 0.03%)       | (0.11335) LV ( 3)Ce 1<br>s( 0.00%)p 1.00( 0.26%)d99.99( 98.12%)f<br>6.01( 1.57%)g 0.17( 0.04%) | 4.94             |
| (0.98692) BD ( 1) C 2- C 12<br>( 50.07%) 0.7076* C 2 s( 37.32%)p 1.68( 62.62%)d 0.00( 0.06%)<br>( 49.93%) 0.7066* C 12 s( 37.36%)p 1.67( 62.58%)d 0.00( 0.06%)   | (0.11335) LV ( 3)Ce 1<br>s( 0.00%)p 1.00( 0.26%)d99.99( 98.12%)f<br>6.01( 1.57%)g 0.17( 0.04%) | 2.58             |
| (0.98638) BD ( 1) C 4- C 6<br>( 50.02%) 0.7073* C 4 s( 37.31%)p 1.68( 62.64%)d 0.00( 0.06%)<br>( 49.98%) 0.7069* C 6 s( 37.21%)p 1.69( 62.73%)d 0.00( 0.06%)     | (0.11283) LV ( 4)Ce 1<br>s( 0.00%)p 1.00( 0.21%)d99.99( 98.18%)f<br>7.40( 1.57%)g 0.20( 0.04%) | 2.04             |
| (0.98617) BD ( 1) C 6- C 8<br>( 50.01%) 0.7072* C 6 s( 37.19%)p 1.69( 62.75%)d 0.00( 0.06%)<br>( 49.99%) 0.7070* C 8 s( 37.33%)p 1.68( 62.61%)d 0.00( 0.06%)     | (0.11283) LV ( 4)Ce 1<br>s( 0.00%)p 1.00( 0.21%)d99.99( 98.18%)f<br>7.40( 1.57%)g 0.20( 0.04%) | 2.63             |
| (0.84394) BD ( 2) C 8- C 10<br>( 49.97%) 0.7069* C 8 s( 0.15%)p99.99( 99.81%)d 0.21( 0.03%)<br>( 50.03%) 0.7073* C 10 s( 0.15%)p99.99( 99.81%)d 0.21( 0.03%)     | (0.11335) LV ( 3)Ce 1<br>s( 0.00%)p 1.00( 0.26%)d99.99( 98.12%)f<br>6.01( 1.57%)g 0.17( 0.04%) | 3.28             |
| (0.84394) BD ( 2) C 8- C 10<br>( 49.97%) 0.7069* C 8 s( 0.15%)p99.99( 99.81%)d 0.21( 0.03%)<br>( 50.03%) 0.7073* C 10 s( 0.15%)p99.99( 99.81%)d 0.21( 0.03%)     | (0.11283) LV ( 4)Ce 1<br>s( 0.00%)p 1.00( 0.21%)d99.99( 98.18%)f<br>7.40( 1.57%)g 0.20( 0.04%) | 2.27             |
| (0.98699) BD ( 1) C 10- C 18<br>( 50.00%) 0.7071* C 10 s( 37.34%)p 1.68( 62.60%)d 0.00( 0.06%)<br>( 50.00%) 0.7071* C 18 s( 37.34%)p 1.68( 62.60%)d 0.00( 0.06%) | (0.11335) LV ( 3)Ce 1<br>s( 0.00%)p 1.00( 0.26%)d99.99( 98.12%)f<br>6.01( 1.57%)g 0.17( 0.04%) | 2.93             |
| (0.98660) BD ( 1) C 12- C 14<br>( 50.04%) 0.7074* C 12 s( 37.18%)p 1.69( 62.76%)d 0.00( 0.06%)<br>( 49.96%) 0.7068* C 14 s( 37.23%)p 1.68( 62.71%)d 0.00( 0.06%) | (0.11283) LV ( 4)Ce 1<br>s( 0.00%)p 1.00( 0.21%)d99.99( 98.18%)f<br>7.40( 1.57%)g 0.20( 0.04%) | 2.01             |

|                                                                                                                                                                |                                                                                                 |      |
|----------------------------------------------------------------------------------------------------------------------------------------------------------------|-------------------------------------------------------------------------------------------------|------|
| (0.84384) BD ( 2) C 12- C 14<br>( 50.01%) 0.7072* C 12 s( 0.16%)p99.99(99.81%)d 0.21( 0.03%)<br>( 49.99%) 0.7071* C 14 s( 0.16%)p99.99(99.81%)d 0.21( 0.03%)   | (0.11283) LV ( 4)Ce 1<br>s( 0.00%)p 1.00( 0.21%)d99.99( 98.18%)f<br>7.40( 1.57%)g 0.20( 0.04%)  | 4.14 |
| (0.98618) BD ( 1) C 14- C 16<br>( 50.00%) 0.7071* C 14 s( 37.35%)p 1.68(62.59%)d 0.00( 0.06%)<br>( 50.00%) 0.7071* C 16 s( 37.33%)p 1.68(62.61%)d 0.00( 0.06%) | (0.11283) LV ( 4)Ce 1<br>s( 0.00%)p 1.00( 0.21%)d99.99( 98.18%)f<br>7.40( 1.57%)g 0.20( 0.04%)  | 2.72 |
| (0.84394) BD ( 2) C 16- C 18<br>( 49.97%) 0.7069* C 16 s( 0.15%)p99.99(99.81%)d 0.21( 0.03%)<br>( 50.03%) 0.7073* C 18 s( 0.15%)p99.99(99.81%)d 0.21( 0.03%)   | (0.11335) LV ( 3)Ce 1<br>s( 0.00%)p 1.00( 0.26%)d99.99( 98.12%)f<br>6.01( 1.57%)g 0.17( 0.04%)  | 3.27 |
| (0.84394) BD ( 2) C 16- C 18<br>( 49.97%) 0.7069* C 16 s( 0.15%)p99.99(99.81%)d 0.21( 0.03%)<br>( 50.03%) 0.7073* C 18 s( 0.15%)p99.99(99.81%)d 0.21( 0.03%)   | (0.11283) LV ( 4)Ce 1<br>s( 0.00%)p 1.00( 0.21%)d99.99( 98.18%)f<br>7.40( 1.57%)g 0.20( 0.04%)  | 2.27 |
| (0.97959) BD ( 1) C 20- C 22<br>( 50.08%) 0.7077* C 20 s( 35.29%)p 1.83(64.64%)d 0.00( 0.06%)<br>( 49.92%) 0.7066* C 22 s( 35.36%)p 1.83(64.58%)d 0.00( 0.06%) | (0.11335) LV ( 3)Ce 1<br>s( 0.00%)p 1.00( 0.26%)d99.99( 98.12%)f<br>6.01( 1.57%)g 0.17( 0.04%)  | 4.86 |
| (0.97959) BD ( 1) C 20- C 22<br>( 50.08%) 0.7077* C 20 s( 35.29%)p 1.83(64.64%)d 0.00( 0.06%)<br>( 49.92%) 0.7066* C 22 s( 35.36%)p 1.83(64.58%)d 0.00( 0.06%) | (0.11283) LV ( 4)Ce 1<br>s( 0.00%)p 1.00( 0.21%)d99.99( 98.18%)f<br>7.40( 1.57%)g 0.20( 0.04%)  | 4.86 |
| (0.97959) BD ( 1) C 20- C 22<br>( 50.08%) 0.7077* C 20 s( 35.29%)p 1.83(64.64%)d 0.00( 0.06%)<br>( 49.92%) 0.7066* C 22 s( 35.36%)p 1.83(64.58%)d 0.00( 0.06%) | (0.04563) LV ( 7)Ce 1<br>s( 96.49%)p 0.02( 1.59%)d 0.01( 0.71%)f<br>0.01( 1.10%)g 0.00( 0.11%)  | 2.42 |
| (0.85266) BD ( 2) C 20- C 22<br>( 50.06%) 0.7075* C 20 s( 1.44%)p68.31(98.50%)d 0.04( 0.06%)<br>( 49.94%) 0.7067* C 22 s( 1.42%)p69.19(98.51%)d 0.04( 0.06%)   | (0.19853) LV ( 2)Ce 1<br>s( 0.00%)p 0.00( 0.00%)d 1.00( 89.04%)f<br>0.12( 10.92%)g 0.00( 0.04%) | 8.15 |
| (0.85266) BD ( 2) C 20- C 22<br>( 50.06%) 0.7075* C 20 s( 1.44%)p68.31(98.50%)d 0.04( 0.06%)<br>( 49.94%) 0.7067* C 22 s( 1.42%)p69.19(98.51%)d 0.04( 0.06%)   | (0.11335) LV ( 3)Ce 1<br>s( 0.00%)p 1.00( 0.26%)d99.99( 98.12%)f<br>6.01( 1.57%)g 0.17( 0.04%)  | 6.70 |
| (0.85266) BD ( 2) C 20- C 22                                                                                                                                   | (0.11283) LV ( 4)Ce 1<br>s( 0.00%)p 1.00( 0.21%)d99.99( 98.18%)f<br>7.40( 1.57%)g 0.20( 0.04%)  | 6.75 |

|                                                                                                                                                                  |                                                                                               |       |
|------------------------------------------------------------------------------------------------------------------------------------------------------------------|-----------------------------------------------------------------------------------------------|-------|
| ( 50.06%) 0.7075* C 20 s( 1.44%)p68.31( 98.50%)d 0.04( 0.06%)<br>( 49.94%) 0.7067* C 22 s( 1.42%)p69.19( 98.51%)d 0.04( 0.06%)                                   |                                                                                               |       |
| (0.85266) BD ( 2) C 20- C 22<br>( 50.06%) 0.7075* C 20 s( 1.44%)p68.31( 98.50%)d 0.04( 0.06%)<br>( 49.94%) 0.7067* C 22 s( 1.42%)p69.19( 98.51%)d 0.04( 0.06%)   | (0.04563) LV ( 7)Ce 1<br>(s( 96.49%)p 0.02( 1.59%)d 0.01( 0.71%)f 0.01( 1.10%)g 0.00( 0.11%)  | 3.40  |
| (0.97780) BD ( 1) C 20- C 28<br>( 50.00%) 0.7071* C 20 s( 36.76%)p 1.72( 63.17%)d 0.00( 0.06%)<br>( 50.00%) 0.7071* C 28 s( 36.76%)p 1.72( 63.17%)d 0.00( 0.06%) | (0.11335) LV ( 3)Ce 1<br>(s( 0.00%)p 1.00( 0.26%)d99.99( 98.12%)f 6.01( 1.57%)g 0.17( 0.04%)  | 11.21 |
| (0.97780) BD ( 1) C 20- C 28<br>( 50.00%) 0.7071* C 20 s( 36.76%)p 1.72( 63.17%)d 0.00( 0.06%)<br>( 50.00%) 0.7071* C 28 s( 36.76%)p 1.72( 63.17%)d 0.00( 0.06%) | (0.04563) LV ( 7)Ce 1<br>(s( 96.49%)p 0.02( 1.59%)d 0.01( 0.71%)f 0.01( 1.10%)g 0.00( 0.11%)  | 2.86  |
| (0.97717) BD ( 1) C 22- C 24<br>( 50.00%) 0.7071* C 22 s( 36.77%)p 1.72( 63.16%)d 0.00( 0.07%)<br>( 50.00%) 0.7071* C 24 s( 36.77%)p 1.72( 63.16%)d 0.00( 0.07%) | (0.11283) LV ( 4)Ce 1<br>(s( 0.00%)p 1.00( 0.21%)d99.99( 98.18%)f 7.40( 1.57%)g 0.20( 0.04%)  | 11.01 |
| (0.97717) BD ( 1) C 22- C 24<br>( 50.00%) 0.7071* C 22 s( 36.77%)p 1.72( 63.16%)d 0.00( 0.07%)<br>( 50.00%) 0.7071* C 24 s( 36.77%)p 1.72( 63.16%)d 0.00( 0.07%) | (0.04563) LV ( 7)Ce 1<br>(s( 96.49%)p 0.02( 1.59%)d 0.01( 0.71%)f 0.01( 1.10%)g 0.00( 0.11%)  | 2.81  |
| (0.97958) BD ( 1) C 24- C 26<br>( 49.92%) 0.7065* C 24 s( 35.36%)p 1.83( 64.57%)d 0.00( 0.06%)<br>( 50.08%) 0.7077* C 26 s( 35.29%)p 1.83( 64.65%)d 0.00( 0.06%) | (0.11335) LV ( 3)Ce 1<br>(s( 0.00%)p 1.00( 0.26%)d99.99( 98.12%)f 6.01( 1.57%)g 0.17( 0.04%)  | 4.90  |
| (0.97958) BD ( 1) C 24- C 26<br>( 49.92%) 0.7065* C 24 s( 35.36%)p 1.83( 64.57%)d 0.00( 0.06%)<br>( 50.08%) 0.7077* C 26 s( 35.29%)p 1.83( 64.65%)d 0.00( 0.06%) | (0.11283) LV ( 4)Ce 1<br>(s( 0.00%)p 1.00( 0.21%)d99.99( 98.18%)f 7.40( 1.57%)g 0.20( 0.04%)  | 4.85  |
| (0.97958) BD ( 1) C 24- C 26<br>( 49.92%) 0.7065* C 24 s( 35.36%)p 1.83( 64.57%)d 0.00( 0.06%)<br>( 50.08%) 0.7077* C 26 s( 35.29%)p 1.83( 64.65%)d 0.00( 0.06%) | (0.04563) LV ( 7)Ce 1<br>(s( 96.49%)p 0.02( 1.59%)d 0.01( 0.71%)f 0.01( 1.10%)g 0.00( 0.11%)  | 2.41  |
| (0.85263) BD ( 2) C 24- C 26<br>( 49.95%) 0.7067* C 24 s( 1.42%)p69.20( 98.51%)d 0.04( 0.06%)                                                                    | (0.19853) LV ( 2)Ce 1<br>(s( 0.00%)p 0.00( 0.00%)d 1.00( 89.04%)f 0.12( 10.92%)g 0.00( 0.04%) | 8.16  |

|                                                                                                                                                                  |                                                                                              |       |
|------------------------------------------------------------------------------------------------------------------------------------------------------------------|----------------------------------------------------------------------------------------------|-------|
| ( 50.05%) 0.7075* C 26 s( 1.45%)p68.14( 98.49%)d 0.04( 0.06%)                                                                                                    |                                                                                              |       |
| (0.85263) BD ( 2) C 24- C 26<br>( 49.95%) 0.7067* C 24 s( 1.42%)p69.20( 98.51%)d 0.04( 0.06%)<br>( 50.05%) 0.7075* C 26 s( 1.45%)p68.14( 98.49%)d 0.04( 0.06%)   | (0.11335) LV ( 3)Ce 1<br>s( 0.00%)p 1.00( 0.26%)d99.99( 98.12%)f 6.01( 1.57%)g 0.17( 0.04%)  | 6.73  |
| (0.85263) BD ( 2) C 24- C 26<br>( 49.95%) 0.7067* C 24 s( 1.42%)p69.20( 98.51%)d 0.04( 0.06%)<br>( 50.05%) 0.7075* C 26 s( 1.45%)p68.14( 98.49%)d 0.04( 0.06%)   | (0.11283) LV ( 4)Ce 1<br>s( 0.00%)p 1.00( 0.21%)d99.99( 98.18%)f 7.40( 1.57%)g 0.20( 0.04%)  | 6.72  |
| (0.85263) BD ( 2) C 24- C 26<br>( 49.95%) 0.7067* C 24 s( 1.42%)p69.20( 98.51%)d 0.04( 0.06%)<br>( 50.05%) 0.7075* C 26 s( 1.45%)p68.14( 98.49%)d 0.04( 0.06%)   | (0.04563) LV ( 7)Ce 1<br>s( 96.49%)p 0.02( 1.59%)d 0.01( 0.71%)f 0.01( 1.10%)g 0.00( 0.11%)  | 3.36  |
| (0.97777) BD ( 1) C 26- C 34<br>( 50.00%) 0.7071* C 26 s( 36.77%)p 1.72( 63.17%)d 0.00( 0.06%)<br>( 50.00%) 0.7071* C 34 s( 36.77%)p 1.72( 63.17%)d 0.00( 0.06%) | (0.11335) LV ( 3)Ce 1<br>s( 0.00%)p 1.00( 0.26%)d99.99( 98.12%)f 6.01( 1.57%)g 0.17( 0.04%)  | 11.25 |
| (0.97777) BD ( 1) C 26- C 34<br>( 50.00%) 0.7071* C 26 s( 36.77%)p 1.72( 63.17%)d 0.00( 0.06%)<br>( 50.00%) 0.7071* C 34 s( 36.77%)p 1.72( 63.17%)d 0.00( 0.06%) | (0.04563) LV ( 7)Ce 1<br>s( 96.49%)p 0.02( 1.59%)d 0.01( 0.71%)f 0.01( 1.10%)g 0.00( 0.11%)  | 2.85  |
| (0.97959) BD ( 1) C 28- C 30<br>( 50.08%) 0.7077* C 28 s( 35.29%)p 1.83( 64.64%)d 0.00( 0.06%)<br>( 49.92%) 0.7066* C 30 s( 35.36%)p 1.83( 64.58%)d 0.00( 0.06%) | (0.11335) LV ( 3)Ce 1<br>s( 0.00%)p 1.00( 0.26%)d99.99( 98.12%)f 6.01( 1.57%)g 0.17( 0.04%)  | 4.88  |
| (0.97959) BD ( 1) C 28- C 30<br>( 50.08%) 0.7077* C 28 s( 35.29%)p 1.83( 64.64%)d 0.00( 0.06%)<br>( 49.92%) 0.7066* C 30 s( 35.36%)p 1.83( 64.58%)d 0.00( 0.06%) | (0.11283) LV ( 4)Ce 1<br>s( 0.00%)p 1.00( 0.21%)d99.99( 98.18%)f 7.40( 1.57%)g 0.20( 0.04%)  | 4.85  |
| (0.97959) BD ( 1) C 28- C 30<br>( 50.08%) 0.7077* C 28 s( 35.29%)p 1.83( 64.64%)d 0.00( 0.06%)<br>( 49.92%) 0.7066* C 30 s( 35.36%)p 1.83( 64.58%)d 0.00( 0.06%) | (0.04563) LV ( 7)Ce 1<br>s( 96.49%)p 0.02( 1.59%)d 0.01( 0.71%)f 0.01( 1.10%)g 0.00( 0.11%)  | 2.42  |
| (0.85266) BD ( 2) C 28- C 30<br>( 50.06%) 0.7075* C 28 s( 1.44%)p68.31( 98.50%)d 0.04( 0.06%)<br>( 49.94%) 0.7067* C 30 s( 1.42%)p69.19( 98.51%)d 0.04( 0.06%)   | (0.19853) LV ( 2)Ce 1<br>s( 0.00%)p 0.00( 0.00%)d 1.00( 89.04%)f 0.12( 10.92%)g 0.00( 0.04%) | 8.15  |

|                                                                                                                                                                  |                                                                                              |       |
|------------------------------------------------------------------------------------------------------------------------------------------------------------------|----------------------------------------------------------------------------------------------|-------|
| (0.85266) BD ( 2) C 28- C 30<br>( 50.06%) 0.7075* C 28 s( 1.44%)p68.31( 98.50%)d 0.04( 0.06%)<br>( 49.94%) 0.7067* C 30 s( 1.42%)p69.19( 98.51%)d 0.04( 0.06%)   | (0.11335) LV ( 3)Ce 1<br>s( 0.00%)p 1.00( 0.26%)d99.99( 98.12%)f 6.01( 1.57%)g 0.17( 0.04%)  | 6.71  |
| (0.85266) BD ( 2) C 28- C 30<br>( 50.06%) 0.7075* C 28 s( 1.44%)p68.31( 98.50%)d 0.04( 0.06%)<br>( 49.94%) 0.7067* C 30 s( 1.42%)p69.19( 98.51%)d 0.04( 0.06%)   | (0.11283) LV ( 4)Ce 1<br>s( 0.00%)p 1.00( 0.21%)d99.99( 98.18%)f 7.40( 1.57%)g 0.20( 0.04%)  | 6.74  |
| (0.85266) BD ( 2) C 28- C 30<br>( 50.06%) 0.7075* C 28 s( 1.44%)p68.31( 98.50%)d 0.04( 0.06%)<br>( 49.94%) 0.7067* C 30 s( 1.42%)p69.19( 98.51%)d 0.04( 0.06%)   | (0.04563) LV ( 7)Ce 1<br>s( 96.49%)p 0.02( 1.59%)d 0.01( 0.71%)f 0.01( 1.10%)g 0.00( 0.11%)  | 3.40  |
| (0.97717) BD ( 1) C 30- C 32<br>( 50.00%) 0.7071* C 30 s( 36.77%)p 1.72( 63.16%)d 0.00( 0.07%)<br>( 50.00%) 0.7071* C 32 s( 36.77%)p 1.72( 63.16%)d 0.00( 0.07%) | (0.11283) LV ( 4)Ce 1<br>s( 0.00%)p 1.00( 0.21%)d99.99( 98.18%)f 7.40( 1.57%)g 0.20( 0.04%)  | 11.01 |
| (0.97717) BD ( 1) C 30- C 32<br>( 50.00%) 0.7071* C 30 s( 36.77%)p 1.72( 63.16%)d 0.00( 0.07%)<br>( 50.00%) 0.7071* C 32 s( 36.77%)p 1.72( 63.16%)d 0.00( 0.07%) | (0.04563) LV ( 7)Ce 1<br>s( 96.49%)p 0.02( 1.59%)d 0.01( 0.71%)f 0.01( 1.10%)g 0.00( 0.11%)  | 2.81  |
| (0.97958) BD ( 1) C 32- C 34<br>( 49.92%) 0.7065* C 32 s( 35.36%)p 1.83( 64.57%)d 0.00( 0.06%)<br>( 50.08%) 0.7077* C 34 s( 35.29%)p 1.83( 64.65%)d 0.00( 0.06%) | (0.11335) LV ( 3)Ce 1<br>s( 0.00%)p 1.00( 0.26%)d99.99( 98.12%)f 6.01( 1.57%)g 0.17( 0.04%)  | 4.89  |
| (0.97958) BD ( 1) C 32- C 34<br>( 49.92%) 0.7065* C 32 s( 35.36%)p 1.83( 64.57%)d 0.00( 0.06%)<br>( 50.08%) 0.7077* C 34 s( 35.29%)p 1.83( 64.65%)d 0.00( 0.06%) | (0.11283) LV ( 4)Ce 1<br>s( 0.00%)p 1.00( 0.21%)d99.99( 98.18%)f 7.40( 1.57%)g 0.20( 0.04%)  | 4.86  |
| (0.85263) BD ( 2) C 32- C 34<br>( 49.95%) 0.7067* C 32 s( 1.42%)p69.21( 98.51%)d 0.04( 0.06%)<br>( 50.05%) 0.7075* C 34 s( 1.45%)p68.14( 98.49%)d 0.04( 0.06%)   | (0.19853) LV ( 2)Ce 1<br>s( 0.00%)p 0.00( 0.00%)d 1.00( 89.04%)f 0.12( 10.92%)g 0.00( 0.04%) | 8.16  |
| (0.85263) BD ( 2) C 32- C 34<br>( 49.95%) 0.7067* C 32 s( 1.42%)p69.21( 98.51%)d 0.04( 0.06%)<br>( 50.05%) 0.7075* C 34 s( 1.45%)p68.14( 98.49%)d 0.04( 0.06%)   | (0.11335) LV ( 3)Ce 1<br>s( 0.00%)p 1.00( 0.26%)d99.99( 98.12%)f 6.01( 1.57%)g 0.17( 0.04%)  | 6.71  |
| (0.85263) BD ( 2) C 32- C 34                                                                                                                                     | (0.11283) LV ( 4)Ce 1<br>s( 0.00%)p 1.00( 0.21%)d99.99( 98.18%)f 7.40( 1.57%)g 0.20( 0.04%)  | 6.73  |



|                                                                                                                                                              |                                                                                             |      |
|--------------------------------------------------------------------------------------------------------------------------------------------------------------|---------------------------------------------------------------------------------------------|------|
| ( 49.95%) 0.7067* C 32 s( 1.42%)p69.21(98.51%)d 0.04( 0.06%)<br>( 50.05%) 0.7075* C 34 s( 1.45%)p68.14(98.49%)d 0.04( 0.06%)                                 |                                                                                             |      |
| (0.85263) BD ( 2) C 32- C 34<br>( 49.95%) 0.7067* C 32 s( 1.42%)p69.21(98.51%)d 0.04( 0.06%)<br>( 50.05%) 0.7075* C 34 s( 1.45%)p68.14(98.49%)d 0.04( 0.06%) | (0.04563) LV ( 7)Ce 1<br>s( 96.49%)p 0.02( 1.59%)d 0.01( 0.71%)f 0.01( 1.10%)g 0.00( 0.11%) | 3.36 |

Table S33: NBO analysis of canonical molecular orbitals for 2-Ce-cis.

|                                                                                                                                                                                                                     |                                                                                                                                                                                                                                                                                                                                                                                                                                                                                                                                                                                                                                                              |
|---------------------------------------------------------------------------------------------------------------------------------------------------------------------------------------------------------------------|--------------------------------------------------------------------------------------------------------------------------------------------------------------------------------------------------------------------------------------------------------------------------------------------------------------------------------------------------------------------------------------------------------------------------------------------------------------------------------------------------------------------------------------------------------------------------------------------------------------------------------------------------------------|
| MO 73 (occ): orbital energy = -0.19089 a.u.<br>0.993*[ 31]: LP ( 1)Ce 1(lp)                                                                                                                                         | (0.99737) LP ( 1)Ce 1<br>s( 0.02%)p 0.03( 0.00%)d 8.74( 0.15%)f99.99(99.83%)g 0.04( 0.00%)                                                                                                                                                                                                                                                                                                                                                                                                                                                                                                                                                                   |
| MO 74 (occ): orbital energy = -0.18520 a.u.<br>0.419*[ 73]: BD ( 2) C32- C34<br>0.419*[ 57]: BD ( 2) C20- C22<br>-0.419*[ 68]: BD ( 2) C28- C30<br>-0.419*[ 63]: BD ( 2) C24- C26<br>0.323*[ 77]: LV ( 2)Ce 1(lv)   | (0.85263) BD ( 2) C 32- C 34<br>( 49.95%) 0.7067* C 32 s( 1.42%)p69.21(98.51%)d 0.04( 0.06%)<br>( 50.05%) 0.7075* C 34 s( 1.45%)p68.14(98.49%)d 0.04( 0.06%)<br>(0.85266) BD ( 2) C 20- C 22<br>( 50.06%) 0.7075* C 20 s( 1.44%)p68.31(98.50%)d 0.04( 0.06%)<br>( 49.94%) 0.7067* C 22 s( 1.42%)p69.19(98.51%)d 0.04( 0.06%)<br>(0.85266) BD ( 2) C 28- C 30<br>( 50.06%) 0.7075* C 28 s( 1.44%)p68.31(98.50%)d 0.04( 0.06%)<br>( 49.94%) 0.7067* C 30 s( 1.42%)p69.19(98.51%)d 0.04( 0.06%)<br>(0.85263) BD ( 2) C 24- C 26<br>( 49.95%) 0.7067* C 24 s( 1.42%)p69.20(98.51%)d 0.04( 0.06%)<br>( 50.05%) 0.7075* C 26 s( 1.45%)p68.14(98.49%)d 0.04( 0.06%) |
| MO 75 (occ): orbital energy = -0.18505 a.u.<br>0.423*[112]: BD*( 2) C20- C22*<br>0.423*[118]: BD*( 2) C24- C26*<br>0.423*[127]: BD*( 2) C32- C34*<br>0.423*[ 75]: BD*( 2) C28- C30*<br>0.323*[ 76]: LV ( 1)Ce 1(lv) | (0.19876) LV ( 1)Ce 1<br>s( 0.00%)p 0.00( 0.00%)d 1.00( 89.02%)f 0.12(10.94%)g 0.00( 0.04%)                                                                                                                                                                                                                                                                                                                                                                                                                                                                                                                                                                  |

**Table S34:** Energetics of different spin states optimized for 2-Sm-trans.

|       | DFT, $\Delta H$ ( $\Delta G$ ), kcal/mol |               |
|-------|------------------------------------------|---------------|
|       | Dispersion                               | No dispersion |
| s=5/2 | 0.0                                      | 0.0           |
| s=3/2 | 41.3 (44.8)                              | 42.5 (42.9)   |
| s=1/2 | 60.6 (64.6)                              | 65.0 (66.1)   |

**Table S35:** Selected structural parameters for 2-Sm-trans.

|                             | No dispersion |       |       | Dispersion |       |       |
|-----------------------------|---------------|-------|-------|------------|-------|-------|
|                             | s=5/2         | s=3/2 | s=1/2 | s=5/2      | s=3/2 | s=1/2 |
| Sm1-C2                      | 2.89          | 2.89  | 2.89  | 2.87       | 2.87  | 2.86  |
| Sm1-C4                      | 2.98          | 2.97  | 2.98  | 2.96       | 2.94  | 2.94  |
| Sm1-C6                      | 2.91          | 2.90  | 2.90  | 2.89       | 2.87  | 2.87  |
| Sm1-C8                      | 2.82          | 2.81  | 2.81  | 2.80       | 2.79  | 2.79  |
| Sm1-C10                     | 2.77          | 2.75  | 2.76  | 2.75       | 2.74  | 2.74  |
| Sm1-C11                     | 2.69          | 2.63  | 2.62  | 2.65       | 2.61  | 2.60  |
| Sm1-C13                     | 2.69          | 2.63  | 2.62  | 2.66       | 2.62  | 2.61  |
| Sm1-C15                     | 2.69          | 2.64  | 2.63  | 2.66       | 2.62  | 2.61  |
| Sm1-C17                     | 2.69          | 2.63  | 2.62  | 2.66       | 2.61  | 2.61  |
| Sm1-C20                     | 2.89          | 2.89  | 2.89  | 2.87       | 2.87  | 2.86  |
| Sm1-C22                     | 2.98          | 2.97  | 2.99  | 2.96       | 2.94  | 2.94  |
| Sm1-C24                     | 2.91          | 2.90  | 2.91  | 2.89       | 2.87  | 2.87  |
| Sm1-C26                     | 2.82          | 2.81  | 2.81  | 2.80       | 2.79  | 2.79  |
| Sm1-C28                     | 2.69          | 2.63  | 2.62  | 2.65       | 2.61  | 2.60  |
| Sm1-C30                     | 2.69          | 2.63  | 2.63  | 2.66       | 2.62  | 2.61  |
| Sm1-C32                     | 2.69          | 2.64  | 2.63  | 2.66       | 2.62  | 2.61  |
| Sm1-C34                     | 2.69          | 2.63  | 2.62  | 2.66       | 2.61  | 2.61  |
| Sm1-C8 (center of the ring) | 1.96          | 1.88  | 1.86  | 1.92       | 1.86  | 1.84  |
| Sm1-C9 (center of the ring) | 2.10          | 2.09  | 2.09  | 2.07       | 2.06  | 2.06  |

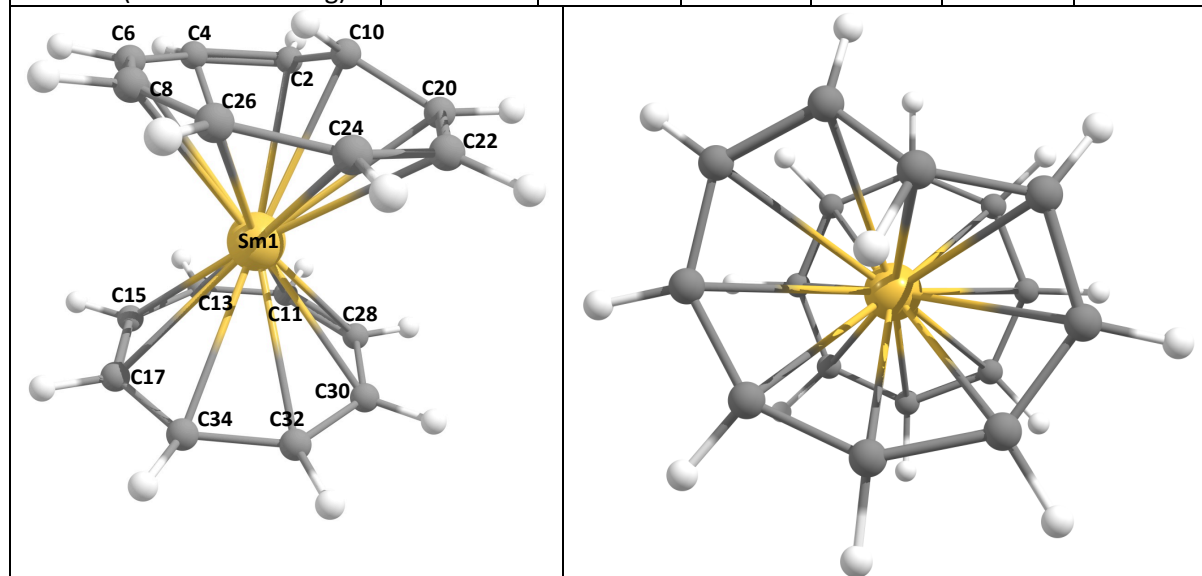

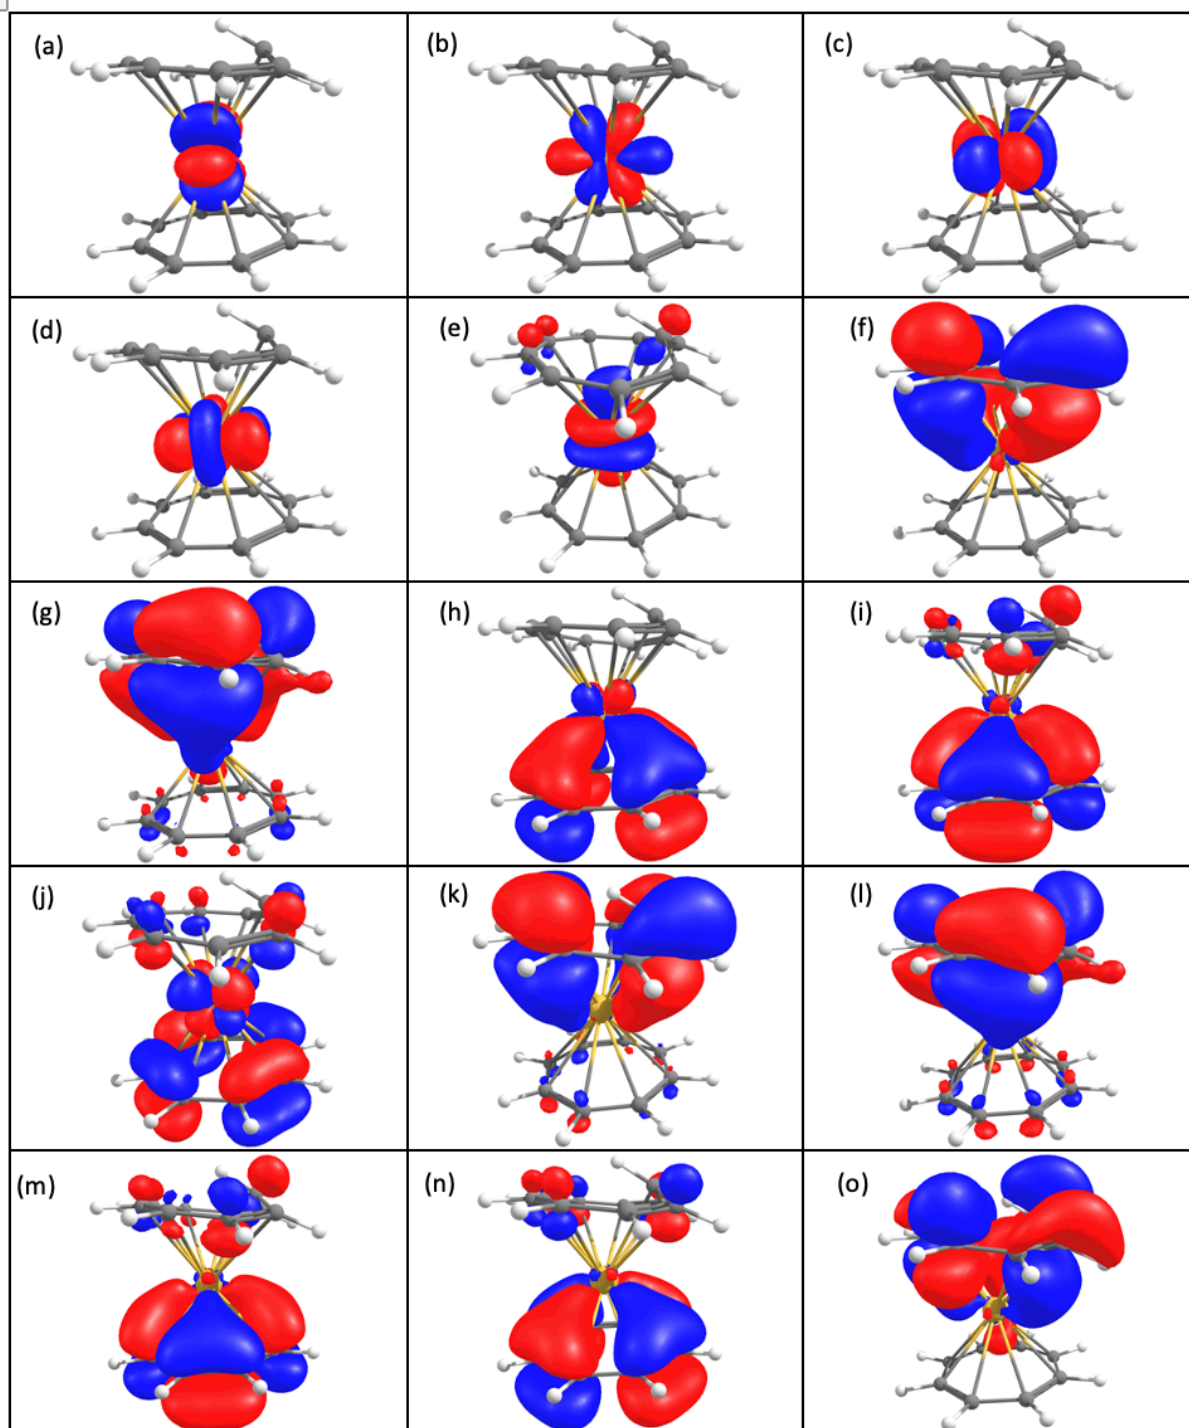

**Figure S90:** DFT computed MO's for 1-disp ( $s=5/2$ ). (a)AMO-HOMO-8 (b)AMO-HOMO-7 (c)AMO-HOMO-6 (d)AMO-HOMO-5 (e)AMO-HOMO-4 (f)AMO-HOMO-3 (g)AMO-HOMO-2 (h)AMO-HOMO-1 (i)AMO-HOMO (j)AMO-LUMO (k)BMO-HOMO-3 (l)BMO-HOMO-2 (m)BMO-HOMO-1 (n)BMO-HOMO (o)BMO-LUMO (p)spin density plot

**Table S36:** Energetics of different spin states optimized for 2-Sm-cis.

|       | DFT, $\Delta H$ ( $\Delta G$ ), kcal/mol |               |
|-------|------------------------------------------|---------------|
|       | Dispersion                               | No dispersion |
| s=5/2 | 0.0                                      | 0.0           |
| s=3/2 | 44.1 (44.7)                              | 44.5 (45.1)   |
| s=1/2 | 63.7 (64.8)                              | 64.3 (65.3)   |

**Table S37:** Selected structural parameters for 2-Sm-cis.

|                             | No dispersion |       |       | Dispersion |       |       |
|-----------------------------|---------------|-------|-------|------------|-------|-------|
|                             | s=5/2         | s=3/2 | s=1/2 | s=5/2      | s=3/2 | s=1/2 |
| Sm1-C2                      | 2.91          | 2.90  | 2.90  | 2.89       | 2.88  | 2.88  |
| Sm1-C4                      | 2.91          | 2.90  | 2.90  | 2.89       | 2.88  | 2.88  |
| Sm1-C6                      | 2.91          | 2.90  | 2.90  | 2.89       | 2.88  | 2.88  |
| Sm1-C8                      | 2.92          | 2.90  | 2.90  | 2.90       | 2.88  | 2.88  |
| Sm1-C10                     | 2.91          | 2.90  | 2.90  | 2.89       | 2.88  | 2.88  |
| Sm1-C12                     | 2.68          | 2.63  | 2.62  | 2.65       | 2.62  | 2.60  |
| Sm1-C14                     | 2.68          | 2.63  | 2.62  | 2.65       | 2.62  | 2.61  |
| Sm1-C16                     | 2.68          | 2.63  | 2.62  | 2.65       | 2.62  | 2.60  |
| Sm1-C18                     | 2.68          | 2.63  | 2.62  | 2.65       | 2.62  | 2.61  |
| Sm1-C20                     | 2.91          | 2.90  | 2.90  | 2.89       | 2.88  | 2.88  |
| Sm1-C22                     | 2.91          | 2.90  | 2.90  | 2.89       | 2.88  | 2.88  |
| Sm1-C24                     | 2.92          | 2.90  | 2.90  | 2.90       | 2.88  | 2.88  |
| Sm1-C26                     | 2.91          | 2.90  | 2.90  | 2.89       | 2.88  | 2.88  |
| Sm1-C28                     | 2.68          | 2.63  | 2.62  | 2.65       | 2.62  | 2.60  |
| Sm1-C30                     | 2.68          | 2.63  | 2.62  | 2.65       | 2.62  | 2.61  |
| Sm1-C32                     | 2.68          | 2.63  | 2.62  | 2.65       | 2.62  | 2.60  |
| Sm1-C34                     | 2.68          | 2.63  | 2.62  | 2.65       | 2.62  | 2.61  |
| Sm1-C8 (center of the ring) | 1.94          | 1.88  | 1.86  | 1.90       | 1.86  | 1.84  |
| Sm1-C9 (center of the ring) | 2.06          | 2.05  | 2.05  | 2.04       | 2.02  | 2.02  |

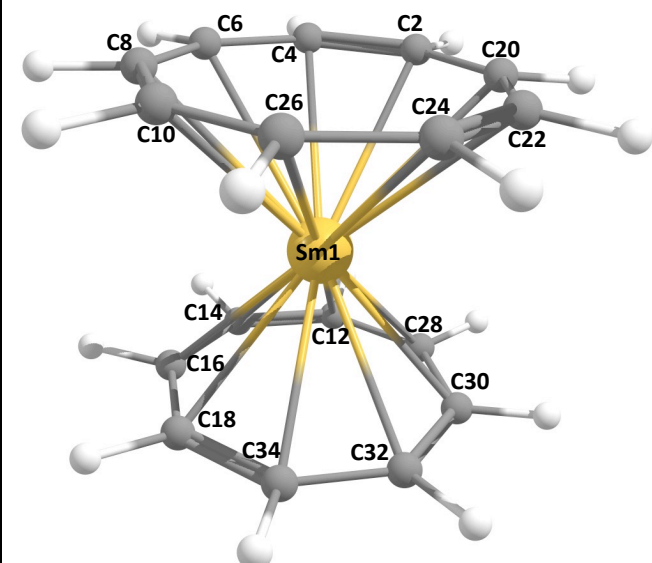


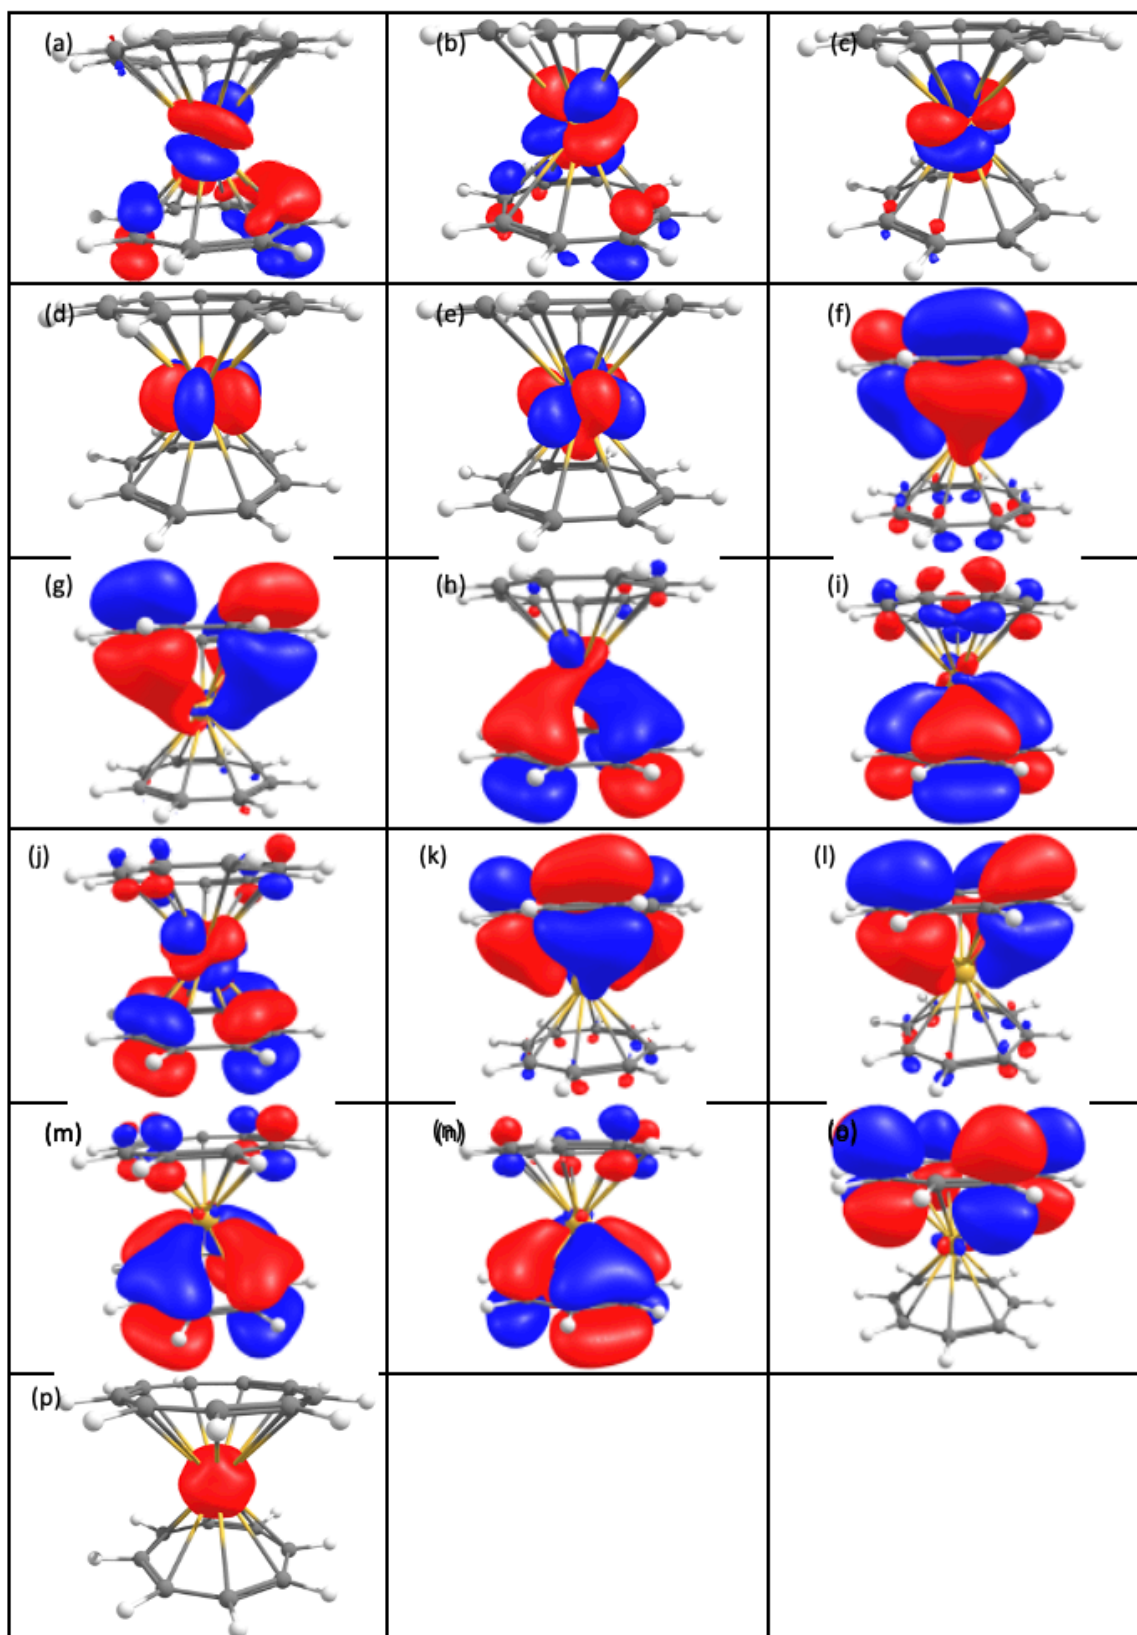

**Figure S91:** DFT computed MO's for **2-Sm-cis-disp** ( $s=5/2$ ). (a)AMO-HOMO-8 (b)AMO-HOMO-7 (c)AMO-HOMO-6 (d)AMO-HOMO-5 (e)AMO-HOMO-4 (f)AMO-HOMO-3 (g)AMO-HOMO-2 (h)AMO-HOMO-1 (i)AMO-HOMO (j)AMO-LUMO (k)BMO-HOMO-3 (l)BMO-HOMO-2 (m)BMO-HOMO-1 (n)BMO-HOMO (o)BMO-LUMO (p)spin density plot

**Table S38:** Computed natural charges for **2-Sm-trans**.

| Atom labels | Natural charges |
|-------------|-----------------|
| Sm1         | 1.32085         |
| C2          | -0.29611        |
| C4          | -0.28653        |
| C6          | -0.33260        |
| C8          | -0.36719        |
| C10         | -0.31247        |
| C11         | -0.37112        |
| C13         | -0.36684        |
| C15         | -0.36724        |
| C17         | -0.37007        |
| C20         | -0.29607        |
| C22         | -0.28649        |
| C24         | -0.33262        |
| C26         | -0.36716        |
| C28         | -0.37164        |
| C30         | -0.36636        |
| C32         | -0.36775        |
| C34         | -0.36955        |

Table S39: Computed Wiberg bond index for 2-Sm-trans.

|             |                   |             |                   |             |                   |             |                   |
|-------------|-------------------|-------------|-------------------|-------------|-------------------|-------------|-------------------|
| Atom labels | Wiberg bond index | Atom labels | Wiberg bond index | Atom labels | Wiberg bond index | Atom labels | Wiberg bond index |
| Sm1         | 0.0000            | Sm1         | 0.0000            | Sm1         | 0.0000            | Sm1         | 0.0000            |
| C2          | 0.0946            | C4          | 0.1056            | C6          | 0.1005            | C8          | 0.1117            |
| Atom labels | Wiberg bond index | Atom labels | Wiberg bond index | Atom labels | Wiberg bond index | Atom labels | Wiberg bond index |
| Sm1         | 0.0000            | Sm1         | 0.0000            | Sm1         | 0.0000            | Sm1         | 0.0000            |
| C10         | 0.1366            | C11         | 0.2333            | C13         | 0.2233            | C15         | 0.2225            |
| Atom labels | Wiberg bond index | Atom labels | Wiberg bond index | Atom labels | Wiberg bond index | Atom labels | Wiberg bond index |
| Sm1         | 0.0000            | Sm1         | 0.0000            | Sm1         | 0.0000            | Sm1         | 0.0000            |
| C17         | 0.2282            | C20         | 0.0946            | C22         | 0.1057            | C24         | 0.1003            |
| Atom labels | Wiberg bond index | Atom labels | Wiberg bond index | Atom labels | Wiberg bond index | Atom labels | Wiberg bond index |
| Sm1         | 0.0000            | Sm1         | 0.0000            | Sm1         | 0.0000            | Sm1         | 0.0000            |
| C26         | 0.1118            | C28         | 0.2328            | C30         | 0.2238            | C32         | 0.2220            |
| Atom labels | Wiberg bond index |             |                   |             |                   |             |                   |
| Sm1         | 0.0000            |             |                   |             |                   |             |                   |
| C34         | 0.2287            |             |                   |             |                   |             |                   |

Table S40: DFT computed NBO second order perturbation analysis for 2-Sm-trans.

| Donor NBO                                                                                                                                                        | Acceptor NBO                                                                                       | E(2)<br>kcal/mol |
|------------------------------------------------------------------------------------------------------------------------------------------------------------------|----------------------------------------------------------------------------------------------------|------------------|
| (0.50122) LP ( 1) C 10<br>s( 0.56%)p99.99( 99.40%)d 0.07( 0.04%)                                                                                                 | (0.11728) LV ( 2)Sm 1<br>s( 0.08%)p 1.60( 0.12%)d99.99( 99.75%)f<br>0.13( 0.01%)g 0.42( 0.03%)     | 8.06             |
| (0.50122) LP ( 1) C 10<br>s( 0.56%)p99.99( 99.40%)d 0.07( 0.04%)                                                                                                 | (0.11091) LV ( 4)Sm 1<br>s( 0.04%)p<br>0.12( 0.00%)d99.99( 88.33%)f99.99( 11.58%)g<br>1.22( 0.05%) | 9.22             |
| (0.50122) LP ( 1) C 10<br>s( 0.56%)p99.99( 99.40%)d 0.07( 0.04%)                                                                                                 | (0.05435) LV ( 5)Sm 1<br>s( 94.83%)p 0.01( 0.56%)d 0.05( 4.33%)f<br>0.00( 0.23%)g 0.00( 0.05%)     | 7.70             |
| (0.50122) LP ( 1) C 10<br>s( 0.56%)p99.99( 99.40%)d 0.07( 0.04%)                                                                                                 | (0.02782) LV ( 6)Sm 1<br>s( 4.73%)p 0.03( 0.14%)d19.07( 90.18%) f<br>1.02( 4.82%)g 0.03( 0.13%)    | 6.10             |
| (0.83135) BD ( 2) C 2- C 4<br>( 51.09%) 0.7148* C 2<br>s( 0.83%)p99.99( 99.10%)d 0.09( 0.07%)<br>( 48.91%) 0.6994* C 4<br>s( 0.43%)p99.99( 99.52%)d 0.13( 0.06%) | (0.18206) LV ( 1)Sm 1<br>s( 0.00%)p 0.00( 0.01%)d 1.00( 99.82%)f<br>0.00( 0.14%)g 0.00( 0.03%)     | 4.03             |
| (0.83135) BD ( 2) C 2- C 4<br>( 51.09%) 0.7148* C 2<br>s( 0.83%)p99.99( 99.10%)d 0.09( 0.07%)<br>( 48.91%) 0.6994* C 4<br>s( 0.43%)p99.99( 99.52%)d 0.13( 0.06%) | (0.11728) LV ( 2)Sm 1<br>s( 0.08%)p 1.60( 0.12%)d99.99( 99.75%)f<br>0.13( 0.01%)g 0.42( 0.03%)     | 4.02             |



|                                                                                                                                                                        |                                                                                                |      |
|------------------------------------------------------------------------------------------------------------------------------------------------------------------------|------------------------------------------------------------------------------------------------|------|
| (0.83135) BD ( 2) C 2- C 4<br>( 51.09%) 0.7148* C 2<br>s( 0.83%)p99.99( 99.10%)d 0.09( 0.07%)<br>( 48.91%) 0.6994* C 4<br>s( 0.43%)p99.99( 99.52%)d 0.13( 0.06%)       | (0.11458) LV ( 3)Sm 1<br>s( 0.00%)p 1.00( 0.04%)d99.99( 99.61%)f<br>6.81( 0.31%)g 0.87( 0.04%) | 6.47 |
| (0.98712) BD ( 1) C 2- C 10<br>( 49.42%) 0.7030* C 2 s( 35.16%)p<br>1.84( 64.78%)d 0.00( 0.07%)<br>( 50.58%) 0.7112* C 10 s( 36.73%)p<br>1.72( 63.21%)d 0.00( 0.06%)   | (0.11728) LV ( 2)Sm 1<br>s( 0.08%)p 1.60( 0.12%)d99.99( 99.75%)f<br>0.13( 0.01%)g 0.42( 0.03%) | 3.96 |
| (0.98668) BD ( 1) C 4- C 6<br>( 49.51%) 0.7036* C 4 s( 35.64%)p<br>1.80( 64.29%)d 0.00( 0.07%)<br>( 50.49%) 0.7106* C 6 s( 37.18%)p<br>1.69( 62.76%)d 0.00( 0.06%)     | (0.11458) LV ( 3)Sm 1<br>s( 0.00%)p 1.00( 0.04%)d99.99( 99.61%)f<br>6.81( 0.31%)g 0.87( 0.04%) | 3.69 |
| (0.98668) BD ( 1) C 4- C 6<br>( 49.51%) 0.7036* C 4 s( 35.64%)p<br>1.80( 64.29%)d 0.00( 0.07%)<br>( 50.49%) 0.7106* C 6 s( 37.18%)p<br>1.69( 62.76%)d 0.00( 0.06%)     | (0.11728) LV ( 2)Sm 1<br>s( 0.08%)p 1.60( 0.12%)d99.99( 99.75%)f<br>0.13( 0.01%)g 0.42( 0.03%) | 4.02 |
| (0.85494) BD ( 2) C 6- C 8<br>( 49.54%) 0.7038* C 6<br>s( 0.52%)p99.99( 99.44%)d 0.07( 0.04%)<br>( 50.46%) 0.7104* C 8<br>s( 0.43%)p99.99( 99.53%)d 0.09( 0.04%)       | (0.11458) LV ( 3)Sm 1<br>s( 0.00%)p 1.00( 0.04%)d99.99( 99.61%)f<br>6.81( 0.31%)g 0.87( 0.04%) | 4.95 |
| (0.85494) BD ( 2) C 6- C 8<br>( 49.54%) 0.7038* C 6<br>s( 0.52%)p99.99( 99.44%)d 0.07( 0.04%)<br>( 50.46%) 0.7104* C 8<br>s( 0.43%)p99.99( 99.53%)d 0.09( 0.04%)       | (0.05435) LV ( 5)Sm 1<br>s( 94.83%)p 0.01( 0.56%)d 0.05( 4.33%)f<br>0.00( 0.23%)g 0.00( 0.05%) | 3.42 |
| (0.98400) BD ( 1) C 8- C 26<br>( 50.00%) 0.7071* C 8 s( 37.50%)p<br>1.66( 62.44%)d 0.00( 0.06%)<br>( 50.00%) 0.7071* C 26 s( 37.50%)p<br>1.66( 62.44%)d 0.00( 0.06%)   | (0.11728) LV ( 2)Sm 1<br>s( 0.08%)p 1.60( 0.12%)d99.99( 99.75%)f<br>0.13( 0.01%)g 0.42( 0.03%) | 5.24 |
| (0.98711) BD ( 1) C 10- C 20<br>( 50.58%) 0.7112* C 10 s( 36.73%)p<br>1.72( 63.21%)d 0.00( 0.06%)<br>( 49.42%) 0.7030* C 20 s( 35.16%)p<br>1.84( 64.78%)d 0.00( 0.07%) | (0.11728) LV ( 2)Sm 1<br>s( 0.08%)p 1.60( 0.12%)d99.99( 99.75%)f<br>0.13( 0.01%)g 0.42( 0.03%) | 3.95 |
| (0.83121) BD ( 2) C 20- C 22<br>( 51.09%) 0.7148* C 20<br>s( 0.83%)p99.99( 99.10%)d 0.09( 0.07%)<br>( 48.91%) 0.6993* C 22<br>s( 0.43%)p99.99( 99.52%)d 0.13( 0.06%)   | (0.18206) LV ( 1)Sm 1<br>s( 0.00%)p 0.00( 0.01%)d 1.00( 99.82%)f<br>0.00( 0.14%)g 0.00( 0.03%) | 4.02 |
| (0.83121) BD ( 2) C 20- C 22<br>( 51.09%) 0.7148* C 20<br>s( 0.83%)p99.99( 99.10%)d 0.09( 0.07%)<br>( 48.91%) 0.6993* C 22<br>s( 0.43%)p99.99( 99.52%)d 0.13( 0.06%)   | (0.11728) LV ( 2)Sm 1<br>s( 0.08%)p 1.60( 0.12%)d99.99( 99.75%)f<br>0.13( 0.01%)g 0.42( 0.03%) | 4.00 |
| (0.83121) BD ( 2) C 20- C 22                                                                                                                                           | (0.11458) LV ( 3)Sm 1                                                                          | 6.49 |



|                                                                                                                                                                        |                                                                                                |      |
|------------------------------------------------------------------------------------------------------------------------------------------------------------------------|------------------------------------------------------------------------------------------------|------|
| ( 51.09%) 0.7148* C 20<br>s( 0.83%)p99.99( 99.10%)d 0.09( 0.07%)<br>( 48.91%) 0.6993* C 22<br>s( 0.43%)p99.99( 99.52%)d 0.13( 0.06%)                                   | s( 0.00%)p 1.00( 0.04%)d99.99( 99.61%)f<br>6.81( 0.31%)g 0.87( 0.04%)                          |      |
| (0.98668) BD ( 1) C 22- C 24<br>( 49.51%) 0.7036* C 22 s( 35.64%)p<br>1.80( 64.29%)d 0.00( 0.07%)<br>( 50.49%) 0.7106* C 24 s( 37.18%)p<br>1.69( 62.76%)d 0.00( 0.06%) | (0.11458) LV ( 3)Sm 1<br>s( 0.00%)p 1.00( 0.04%)d99.99( 99.61%)f<br>6.81( 0.31%)g 0.87( 0.04%) | 3.69 |
| (0.85489) BD ( 2) C 24- C 26<br>( 49.55%) 0.7039* C 24<br>s( 0.52%)p99.99( 99.44%)d 0.07( 0.04%)<br>( 50.45%) 0.7103* C 26<br>s( 0.43%)p99.99( 99.53%)d 0.09( 0.04%)   | (0.11728) LV ( 2)Sm 1<br>s( 0.08%)p 1.60( 0.12%)d99.99( 99.75%)f<br>0.13( 0.01%)g 0.42( 0.03%) | 4.04 |
| (0.85489) BD ( 2) C 24- C 26<br>( 49.55%) 0.7039* C 24<br>s( 0.52%)p99.99( 99.44%)d 0.07( 0.04%)<br>( 50.45%) 0.7103* C 26<br>s( 0.43%)p99.99( 99.53%)d 0.09( 0.04%)   | (0.11458) LV ( 3)Sm 1<br>s( 0.00%)p 1.00( 0.04%)d99.99( 99.61%)f<br>6.81( 0.31%)g 0.87( 0.04%) | 4.93 |
| (0.85489) BD ( 2) C 24- C 26<br>( 49.55%) 0.7039* C 24<br>s( 0.52%)p99.99( 99.44%)d 0.07( 0.04%)<br>( 50.45%) 0.7103* C 26<br>s( 0.43%)p99.99( 99.53%)d 0.09( 0.04%)   | (0.05435) LV ( 5)Sm 1<br>s( 94.83%)p 0.01( 0.56%)d 0.05( 4.33%)f<br>0.00( 0.23%)g 0.00( 0.05%) | 3.42 |
| (0.98010) BD ( 1) C 11- C 13<br>( 50.09%) 0.7078* C 11 s( 35.29%)p<br>1.83( 64.65%)d 0.00( 0.06%)<br>( 49.91%) 0.7064* C 13 s( 35.41%)p<br>1.82( 64.53%)d 0.00( 0.06%) | (0.11728) LV ( 2)Sm 1<br>s( 0.08%)p 1.60( 0.12%)d99.99( 99.75%)f<br>0.13( 0.01%)g 0.42( 0.03%) | 4.50 |
| (0.98010) BD ( 1) C 11- C 13<br>( 50.09%) 0.7078* C 11 s( 35.29%)p<br>1.83( 64.65%)d 0.00( 0.06%)<br>( 49.91%) 0.7064* C 13 s( 35.41%)p<br>1.82( 64.53%)d 0.00( 0.06%) | (0.11458) LV ( 3)Sm 1<br>s( 0.00%)p 1.00( 0.04%)d99.99( 99.61%)f<br>6.81( 0.31%)g 0.87( 0.04%) | 4.86 |
| (0.86593) BD ( 2) C 11- C 13<br>( 49.75%) 0.7054* C 11<br>s( 1.11%)p88.74( 98.83%)d 0.05( 0.06%)<br>( 50.25%) 0.7089* C 13<br>s( 1.03%)p96.43( 98.91%)d 0.06( 0.06%)   | (0.18206) LV ( 1)Sm 1<br>s( 0.00%)p 0.00( 0.01%)d 1.00( 99.82%)f<br>0.00( 0.14%)g 0.00( 0.03%) | 5.76 |
| (0.86593) BD ( 2) C 11- C 13<br>( 49.75%) 0.7054* C 11<br>s( 1.11%)p88.74( 98.83%)d 0.05( 0.06%)<br>( 50.25%) 0.7089* C 13<br>s( 1.03%)p96.43( 98.91%)d 0.06( 0.06%)   | (0.11728) LV ( 2)Sm 1<br>s( 0.08%)p 1.60( 0.12%)d99.99( 99.75%)f<br>0.13( 0.01%)g 0.42( 0.03%) | 5.91 |
| (0.86593) BD ( 2) C 11- C 13<br>( 49.75%) 0.7054* C 11<br>s( 1.11%)p88.74( 98.83%)d 0.05( 0.06%)<br>( 50.25%) 0.7089* C 13<br>s( 1.03%)p96.43( 98.91%)d 0.06( 0.06%)   | (0.11458) LV ( 3)Sm 1<br>s( 0.00%)p 1.00( 0.04%)d99.99( 99.61%)f<br>6.81( 0.31%)g 0.87( 0.04%) | 6.71 |
| (0.86593) BD ( 2) C 11- C 13                                                                                                                                           | (0.05435) LV ( 5)Sm 1                                                                          | 4.16 |

|                                                                                                                                                                        |                                                                                                |       |
|------------------------------------------------------------------------------------------------------------------------------------------------------------------------|------------------------------------------------------------------------------------------------|-------|
| ( 49.75%) 0.7054* C 11<br>s( 1.11%)p88.74( 98.83%)d 0.05( 0.06%)<br>( 50.25%) 0.7089* C 13<br>s( 1.03%)p96.43( 98.91%)d 0.06( 0.06%)                                   | s( 94.83%)p 0.01( 0.56%)d 0.05( 4.33%)f<br>0.00( 0.23%)g 0.00( 0.05%)                          |       |
| (0.97903) BD ( 1) C 11- C 28<br>( 50.00%) 0.7071* C 11 s( 37.09%)p<br>1.69( 62.84%)d 0.00( 0.07%)<br>( 50.00%) 0.7071* C 28 s( 37.09%)p<br>1.69( 62.84%)d 0.00( 0.07%) | (0.11728) LV ( 2)Sm 1<br>s( 0.08%)p 1.60( 0.12%)d99.99( 99.75%)f<br>0.13( 0.01%)g 0.42( 0.03%) | 10.92 |
| (0.97880) BD ( 1) C 13- C 15<br>( 50.01%) 0.7072* C 13 s( 37.26%)p<br>1.68( 62.67%)d 0.00( 0.07%)<br>( 49.99%) 0.7070* C 15 s( 37.23%)p<br>1.68( 62.70%)d 0.00( 0.07%) | (0.11458) LV ( 3)Sm 1<br>s( 0.00%)p 1.00( 0.04%)d99.99( 99.61%)f<br>6.81( 0.31%)g 0.87( 0.04%) | 11.05 |
| (0.97880) BD ( 1) C 13- C 15<br>( 50.01%) 0.7072* C 13 s( 37.26%)p<br>1.68( 62.67%)d 0.00( 0.07%)<br>( 49.99%) 0.7070* C 15 s( 37.23%)p<br>1.68( 62.70%)d 0.00( 0.07%) | (0.05435) LV ( 5)Sm 1<br>s( 94.83%)p 0.01( 0.56%)d 0.05( 4.33%)f<br>0.00( 0.23%)g 0.00( 0.05%) | 3.19  |
| (0.98046) BD ( 1) C 15- C 17<br>( 49.96%) 0.7068* C 15 s( 35.46%)p<br>1.82( 64.48%)d 0.00( 0.06%)<br>( 50.04%) 0.7074* C 17 s( 35.34%)p<br>1.83( 64.60%)d 0.00( 0.06%) | (0.11728) LV ( 2)Sm 1<br>s( 0.08%)p 1.60( 0.12%)d99.99( 99.75%)f<br>0.13( 0.01%)g 0.42( 0.03%) | 5.12  |
| (0.98046) BD ( 1) C 15- C 17<br>( 49.96%) 0.7068* C 15 s( 35.46%)p<br>1.82( 64.48%)d 0.00( 0.06%)<br>( 50.04%) 0.7074* C 17 s( 35.34%)p<br>1.83( 64.60%)d 0.00( 0.06%) | (0.11458) LV ( 3)Sm 1<br>s( 0.00%)p 1.00( 0.04%)d99.99( 99.61%)f<br>6.81( 0.31%)g 0.87( 0.04%) | 4.82  |
| (0.86539) BD ( 2) C 15- C 17<br>( 50.23%) 0.7087* C 15<br>s( 1.01%)p98.42( 98.93%)d 0.06( 0.06%)<br>( 49.77%) 0.7055* C 17<br>s( 1.02%)p96.51( 98.91%)d 0.06( 0.06%)   | (0.18206) LV ( 1)Sm 1<br>s( 0.00%)p 0.00( 0.01%)d 1.00( 99.82%)f<br>0.00( 0.14%)g 0.00( 0.03%) | 6.61  |
| (0.86539) BD ( 2) C 15- C 17<br>( 50.23%) 0.7087* C 15<br>s( 1.01%)p98.42( 98.93%)d 0.06( 0.06%)<br>( 49.77%) 0.7055* C 17<br>s( 1.02%)p96.51( 98.91%)d 0.06( 0.06%)   | (0.11728) LV ( 2)Sm 1<br>s( 0.08%)p 1.60( 0.12%)d99.99( 99.75%)f<br>0.13( 0.01%)g 0.42( 0.03%) | 7.03  |
| (0.86539) BD ( 2) C 15- C 17<br>( 50.23%) 0.7087* C 15<br>s( 1.01%)p98.42( 98.93%)d 0.06( 0.06%)<br>( 49.77%) 0.7055* C 17<br>s( 1.02%)p96.51( 98.91%)d 0.06( 0.06%)   | (0.11458) LV ( 3)Sm 1<br>s( 0.00%)p 1.00( 0.04%)d99.99( 99.61%)f<br>6.81( 0.31%)g 0.87( 0.04%) | 7.15  |
| (0.86539) BD ( 2) C 15- C 17<br>( 50.23%) 0.7087* C 15<br>s( 1.01%)p98.42( 98.93%)d 0.06( 0.06%)<br>( 49.77%) 0.7055* C 17<br>s( 1.02%)p96.51( 98.91%)d 0.06( 0.06%)   | (0.05435) LV ( 5)Sm 1<br>s( 94.83%)p 0.01( 0.56%)d 0.05( 4.33%)f<br>0.00( 0.23%)g 0.00( 0.05%) | 4.37  |
| (0.97978) BD ( 1) C 17- C 34                                                                                                                                           | (0.11728) LV ( 2)Sm 1                                                                          | 11.46 |

|                                                                                                                                                                        |                                                                                                |       |
|------------------------------------------------------------------------------------------------------------------------------------------------------------------------|------------------------------------------------------------------------------------------------|-------|
| ( 50.00%) 0.7071* C 17 s( 37.11%)p<br>1.69( 62.82%)d 0.00( 0.07%)<br>( 50.00%) 0.7071* C 34 s( 37.11%)p<br>1.69( 62.82%)d 0.00( 0.07%)                                 | s( 0.08%)p 1.60( 0.12%)d99.99( 99.75%)f<br>0.13( 0.01%)g 0.42( 0.03%)                          |       |
| (0.98010) BD ( 1) C 28- C 30<br>( 50.10%) 0.7078* C 28 s( 35.29%)p<br>1.83( 64.65%)d 0.00( 0.06%)<br>( 49.90%) 0.7064* C 30 s( 35.41%)p<br>1.82( 64.53%)d 0.00( 0.06%) | (0.11728) LV ( 2)Sm 1<br>s( 0.08%)p 1.60( 0.12%)d99.99( 99.75%)f<br>0.13( 0.01%)g 0.42( 0.03%) | 4.48  |
| (0.98010) BD ( 1) C 28- C 30<br>( 50.10%) 0.7078* C 28 s( 35.29%)p<br>1.83( 64.65%)d 0.00( 0.06%)<br>( 49.90%) 0.7064* C 30 s( 35.41%)p<br>1.82( 64.53%)d 0.00( 0.06%) | (0.11458) LV ( 3)Sm 1<br>s( 0.00%)p 1.00( 0.04%)d99.99( 99.61%)f<br>6.81( 0.31%)g 0.87( 0.04%) | 4.88  |
| (0.86595) BD ( 2) C 28- C 30<br>( 49.85%) 0.7061* C 28<br>s( 1.11%)p88.76( 98.83%)d 0.05( 0.06%)<br>( 50.15%) 0.7081* C 30<br>s( 1.03%)p96.45( 98.91%)d 0.06( 0.06%)   | (0.18206) LV ( 1)Sm 1<br>s( 0.00%)p 0.00( 0.01%)d 1.00( 99.82%)f<br>0.00( 0.14%)g 0.00( 0.03%) | 5.77  |
| (0.86595) BD ( 2) C 28- C 30<br>( 49.85%) 0.7061* C 28<br>s( 1.11%)p88.76( 98.83%)d 0.05( 0.06%)<br>( 50.15%) 0.7081* C 30<br>s( 1.03%)p96.45( 98.91%)d 0.06( 0.06%)   | (0.11728) LV ( 2)Sm 1<br>s( 0.08%)p 1.60( 0.12%)d99.99( 99.75%)f<br>0.13( 0.01%)g 0.42( 0.03%) | 5.88  |
| (0.86595) BD ( 2) C 28- C 30<br>( 49.85%) 0.7061* C 28<br>s( 1.11%)p88.76( 98.83%)d 0.05( 0.06%)<br>( 50.15%) 0.7081* C 30<br>s( 1.03%)p96.45( 98.91%)d 0.06( 0.06%)   | (0.11458) LV ( 3)Sm 1<br>s( 0.00%)p 1.00( 0.04%)d99.99( 99.61%)f<br>6.81( 0.31%)g 0.87( 0.04%) | 6.73  |
| (0.86595) BD ( 2) C 28- C 30<br>( 49.85%) 0.7061* C 28<br>s( 1.11%)p88.76( 98.83%)d 0.05( 0.06%)<br>( 50.15%) 0.7081* C 30<br>s( 1.03%)p96.45( 98.91%)d 0.06( 0.06%)   | (0.05435) LV ( 5)Sm 1<br>s( 94.83%)p 0.01( 0.56%)d 0.05( 4.33%)f<br>0.00( 0.23%)g 0.00( 0.05%) | 4.16  |
| (0.97880) BD ( 1) C 30- C 32<br>( 50.01%) 0.7072* C 30 s( 37.26%)p<br>1.68( 62.67%)d 0.00( 0.07%)<br>( 49.99%) 0.7070* C 32 s( 37.23%)p<br>1.68( 62.70%)d 0.00( 0.07%) | (0.11458) LV ( 3)Sm 1<br>s( 0.00%)p 1.00( 0.04%)d99.99( 99.61%)f<br>6.81( 0.31%)g 0.87( 0.04%) | 11.05 |
| (0.97880) BD ( 1) C 30- C 32<br>( 50.01%) 0.7072* C 30 s( 37.26%)p<br>1.68( 62.67%)d 0.00( 0.07%)<br>( 49.99%) 0.7070* C 32 s( 37.23%)p<br>1.68( 62.70%)d 0.00( 0.07%) | (0.05435) LV ( 5)Sm 1<br>s( 94.83%)p 0.01( 0.56%)d 0.05( 4.33%)f<br>0.00( 0.23%)g 0.00( 0.05%) | 3.19  |
| (0.98046) BD ( 1) C 32- C 34<br>( 49.96%) 0.7068* C 32 s( 35.46%)p<br>1.82( 64.48%)d 0.00( 0.06%)<br>( 50.04%) 0.7074* C 34 s( 35.34%)p<br>1.83( 64.60%)d 0.00( 0.06%) | (0.11728) LV ( 2)Sm 1<br>s( 0.08%)p 1.60( 0.12%)d99.99( 99.75%)f<br>0.13( 0.01%)g 0.42( 0.03%) | 5.14  |
| (0.98046) BD ( 1) C 32- C 34                                                                                                                                           | (0.11458) LV ( 3)Sm 1                                                                          | 4.80  |

|                                                                                                                                                                      |                                                                                                |      |
|----------------------------------------------------------------------------------------------------------------------------------------------------------------------|------------------------------------------------------------------------------------------------|------|
| ( 49.96%) 0.7068* C 32 s( 35.46%)p<br>1.82( 64.48%)d 0.00( 0.06%)<br>( 50.04%) 0.7074* C 34 s( 35.34%)p<br>1.83( 64.60%)d 0.00( 0.06%)                               | s( 0.00%)p 1.00( 0.04%)d99.99( 99.61%)f<br>6.81( 0.31%)g 0.87( 0.04%)                          |      |
| (0.86536) BD ( 2) C 32- C 34<br>( 50.34%) 0.7095* C 32<br>s( 1.01%)p98.41( 98.93%)d 0.06( 0.06%)<br>( 49.66%) 0.7047* C 34<br>s( 1.02%)p96.51( 98.91%)d 0.06( 0.06%) | (0.18206) LV ( 1)Sm 1<br>s( 0.00%)p 0.00( 0.01%)d 1.00( 99.82%)f<br>0.00( 0.14%)g 0.00( 0.03%) | 6.61 |
| (0.86536) BD ( 2) C 32- C 34<br>( 50.34%) 0.7095* C 32<br>s( 1.01%)p98.41( 98.93%)d 0.06( 0.06%)<br>( 49.66%) 0.7047* C 34<br>s( 1.02%)p96.51( 98.91%)d 0.06( 0.06%) | (0.11728) LV ( 2)Sm 1<br>s( 0.08%)p 1.60( 0.12%)d99.99( 99.75%)f<br>0.13( 0.01%)g 0.42( 0.03%) | 7.06 |
| (0.86536) BD ( 2) C 32- C 34<br>( 50.34%) 0.7095* C 32<br>s( 1.01%)p98.41( 98.93%)d 0.06( 0.06%)<br>( 49.66%) 0.7047* C 34<br>s( 1.02%)p96.51( 98.91%)d 0.06( 0.06%) | (0.11458) LV ( 3)Sm 1<br>s( 0.00%)p 1.00( 0.04%)d99.99( 99.61%)f<br>6.81( 0.31%)g 0.87( 0.04%) | 7.12 |
| (0.86536) BD ( 2) C 32- C 34<br>( 50.34%) 0.7095* C 32<br>s( 1.01%)p98.41( 98.93%)d 0.06( 0.06%)<br>( 49.66%) 0.7047* C 34<br>s( 1.02%)p96.51( 98.91%)d 0.06( 0.06%) | (0.05435) LV ( 5)Sm 1<br>s( 94.83%)p 0.01( 0.56%)d 0.05( 4.33%)f<br>0.00( 0.23%)g 0.00( 0.05%) | 4.37 |

Table S 41: NBO analysis of canonical molecular orbitals for 2-Sm-trans.

|                                                                                                                                                                                                                               |                                                                                                                                                                                                                                                                                                                                                                                                                                                                                                                                                                                                                                                                                                                                                             |
|-------------------------------------------------------------------------------------------------------------------------------------------------------------------------------------------------------------------------------|-------------------------------------------------------------------------------------------------------------------------------------------------------------------------------------------------------------------------------------------------------------------------------------------------------------------------------------------------------------------------------------------------------------------------------------------------------------------------------------------------------------------------------------------------------------------------------------------------------------------------------------------------------------------------------------------------------------------------------------------------------------|
| HOMO-3, MO 76 (occ): orbital energy = -<br>0.22675 a.u.<br>0.445*[ 46]: BD ( 2) C 6- C 8<br>-0.445*[ 69]: BD ( 2) C24- C26<br>-0.384*[ 40]: BD ( 2) C 2- C 4<br>0.383*[ 64]: BD ( 2) C20- C22<br>0.323*[ 80]: LV ( 1)Sm 1(lv) | (0.85494) BD ( 2) C 6- C 8<br>( 49.54%) 0.7038* C 6 s( 0.52%)p99.99( 99.44%)d 0.07( 0.04%)<br>( 50.46%) 0.7104* C 8 s( 0.43%)p99.99( 99.53%)d 0.09( 0.04%)<br>(0.85489) BD ( 2) C 24- C 26<br>( 49.55%) 0.7039* C 24 s( 0.52%)p99.99( 99.44%)d 0.07( 0.04%)<br>( 50.45%) 0.7103* C 26 s( 0.43%)p99.99( 99.53%)d 0.09( 0.04%)<br>(0.83135) BD ( 2) C 2- C 4<br>( 51.09%) 0.7148* C 2 s( 0.83%)p99.99( 99.10%)d 0.09( 0.07%)<br>( 48.91%) 0.6994* C 4 s( 0.43%)p99.99( 99.52%)d 0.13( 0.06%)<br>(0.83121) BD ( 2) C 20- C 22<br>( 51.09%) 0.7148* C 20 s( 0.83%)p99.99( 99.10%)d 0.09( 0.07%)<br>( 48.91%) 0.6993* C 22 s( 0.43%)p99.99( 99.52%)d 0.13( 0.06%)<br>(0.18206) LV ( 1)Sm 1<br>s( 0.00%)p 0.00( 0.01%)d 1.00( 99.82%)f 0.00( 0.14%)g 0.00( 0.03%) |
|-------------------------------------------------------------------------------------------------------------------------------------------------------------------------------------------------------------------------------|-------------------------------------------------------------------------------------------------------------------------------------------------------------------------------------------------------------------------------------------------------------------------------------------------------------------------------------------------------------------------------------------------------------------------------------------------------------------------------------------------------------------------------------------------------------------------------------------------------------------------------------------------------------------------------------------------------------------------------------------------------------|

|                                                                                                                                                                                                                                                                                     |                                                                                                                                                                                                                                                                                                                                                                                                                                                                                                                                                                                                                                                                                                                                                                                                                                                                                                                     |
|-------------------------------------------------------------------------------------------------------------------------------------------------------------------------------------------------------------------------------------------------------------------------------------|---------------------------------------------------------------------------------------------------------------------------------------------------------------------------------------------------------------------------------------------------------------------------------------------------------------------------------------------------------------------------------------------------------------------------------------------------------------------------------------------------------------------------------------------------------------------------------------------------------------------------------------------------------------------------------------------------------------------------------------------------------------------------------------------------------------------------------------------------------------------------------------------------------------------|
| <p>HOMO-2, MO 77 (occ): orbital energy = - 0.22376 a.u.</p> <p>0.412*[ 37]: LP ( 1) C10(lp)<br/> -0.391*[ 95]: BD*( 2) C 6- C 8*<br/> -0.390*[118]: BD*( 2) C24- C26*<br/> 0.339*[ 89]: BD*( 2) C 2- C 4*<br/> 0.338*[113]: BD*( 2) C20- C22*<br/> 0.305*[ 83]: LV ( 4)Sm 1(lv)</p> | <p><u>(0.50122) LP ( 1) C 10</u><br/> s( 0.56%)p99.99( 99.40%)d 0.07( 0.04%)<br/> <u>(0.22752) BD*( 2) C 6- C 8</u><br/> ( 50.46%) 0.7104* C 6 s( 0.52%)p99.99( 99.44%)d 0.07( 0.04%)<br/> ( 49.54%) -0.7038* C 8 s( 0.43%)p99.99( 99.53%)d 0.09( 0.04%)<br/> <u>(0.22754) BD*( 2) C 24- C 26</u><br/> ( 50.45%) 0.7103* C 24 s( 0.52%)p99.99( 99.44%)d 0.07( 0.04%)<br/> ( 49.55%) -0.7039* C 26 s( 0.43%)p99.99( 99.53%)d 0.09( 0.04%)<br/> <u>(0.20396) BD*( 2) C 2- C 4</u><br/> ( 48.91%) 0.6994* C 2 s( 0.83%)p99.99( 99.10%)d 0.09( 0.07%)<br/> ( 51.09%) -0.7148* C 4 s( 0.43%)p99.99( 99.52%)d 0.13( 0.06%)<br/> <u>(0.20400) BD*( 2) C 20- C 22</u><br/> ( 48.91%) 0.6993* C 20 s( 0.83%)p99.99( 99.10%)d 0.09( 0.07%)<br/> ( 51.09%) -0.7148* C 22 s( 0.43%)p99.99( 99.52%)d 0.13( 0.06%)<br/> <u>(0.11091) LV ( 4)Sm 1</u><br/> s( 0.04%)p 0.12( 0.00%)d99.99( 88.33%)f99.99( 11.58%)g 1.22( 0.05%)</p> |
| <p>HOMO-1, MO 78 (occ): orbital energy = - 0.18642 a.u.</p> <p>-0.629*[ 36]: LP ( 6)Sm 1(lp)<br/> -0.361*[102]: BD*( 2) C11- C13*<br/> -0.361*[122]: BD*( 2) C28- C30*<br/> -0.359*[127]: BD*( 2) C32- C34*<br/> -0.359*[108]: BD*( 2) C15- C17*</p>                                | <p><u>(0.02782) LV ( 6)Sm 1</u><br/> s( 4.73%)p 0.03( 0.14%)d19.07( 90.18%)f 1.02( 4.82%)g 0.03( 0.13%)<br/> <u>(0.21943) BD*( 2) C 28- C 30</u><br/> ( 50.15%) 0.7081* C 28 s( 1.11%)p88.76( 98.83%)d 0.05( 0.06%)<br/> ( 49.85%) -0.7061* C 30 s( 1.03%)p96.45( 98.91%)d 0.06( 0.06%)<br/> <u>(0.21632) BD*( 2) C 32- C 34</u><br/> ( 49.66%) 0.7047* C 32 s( 1.01%)p98.41( 98.93%)d 0.06( 0.06%)<br/> ( 50.34%) -0.7095* C 34 s( 1.02%)p96.51( 98.91%)d 0.06( 0.06%)<br/> <u>(0.21632) BD*( 2) C 15- C 17</u><br/> ( 49.77%) 0.7055* C 15 s( 1.01%)p98.42( 98.93%)d 0.06( 0.06%)<br/> ( 50.23%) -0.7087* C 17 s( 1.02%)p96.51( 98.91%)d 0.06( 0.06%)</p>                                                                                                                                                                                                                                                         |
| <p>HOMO, MO 79 (occ): orbital energy = - 0.16429 a.u.</p> <p>0.433*[ 73]: BD ( 2) C28- C30<br/> -0.433*[ 53]: BD ( 2) C11- C13<br/> 0.430*[ 59]: BD ( 2) C15- C17<br/> -0.430*[ 78]: BD ( 2) C32- C34<br/> 0.250*[ 80]: LV ( 1)Sm 1(lv)</p>                                         | <p><u>(0.86595) BD ( 2) C 28- C 30</u><br/> ( 49.85%) 0.7061* C 28<br/> s( 1.11%)p88.76( 98.83%)d 0.05( 0.06%)<br/> ( 50.15%) 0.7081* C 30<br/> s( 1.03%)p96.45( 98.91%)d 0.06( 0.06%)<br/> <u>(0.86593) BD ( 2) C 11- C 13</u><br/> ( 49.75%) 0.7054* C 11<br/> s( 1.11%)p88.74( 98.83%)d 0.05( 0.06%)</p>                                                                                                                                                                                                                                                                                                                                                                                                                                                                                                                                                                                                         |

|  |                                                                                                                                                                             |
|--|-----------------------------------------------------------------------------------------------------------------------------------------------------------------------------|
|  | ( 50.25%) 0.7089* C 13<br>s( 1.03%)p96.43( 98.91%)d 0.06( 0.06%)<br><u>(0.86539) BD ( 2) C 15- C 17</u>                                                                     |
|  | ( 50.23%) 0.7087* C 15<br>s( 1.01%)p98.42( 98.93%)d 0.06( 0.06%)<br>( 49.77%) 0.7055* C 17<br>s( 1.02%)p96.51( 98.91%)d 0.06( 0.06%)<br><u>(0.86536) BD ( 2) C 32- C 34</u> |
|  | ( 50.34%) 0.7095* C 32<br>s( 1.01%)p98.41( 98.93%)d 0.06( 0.06%)<br>( 49.66%) 0.7047* C 34<br>s( 1.02%)p96.51( 98.91%)d 0.06( 0.06%)<br><u>(0.18206) LV ( 1)Sm 1</u>        |
|  | s( 0.00%)p 0.00( 0.01%)d 1.00( 99.82%)f 0.00( 0.14%)g 0.00( 0.03%)                                                                                                          |

**Table S42:** Computed natural charges for 2-Sm-trans.

| Atom labels | Natural charges |
|-------------|-----------------|
| Sm1         | 1.32301         |
| C2          | -0.32685        |
| C4          | -0.32465        |
| C6          | -0.32069        |
| C8          | -0.32108        |
| C10         | -0.32467        |
| C12         | -0.36640        |
| C14         | -0.36370        |
| C16         | -0.35721        |
| C18         | -0.37023        |
| C20         | -0.32519        |
| C22         | -0.31942        |
| C24         | -0.32130        |
| C26         | -0.32547        |
| C28         | -0.36566        |
| C30         | -0.36258        |
| C32         | -0.36296        |
| C34         | -0.36422        |

**Table S43:** Computed Wiberg bond index for **2-Sm-trans**.

|             |                   |             |                   |             |                   |             |                   |
|-------------|-------------------|-------------|-------------------|-------------|-------------------|-------------|-------------------|
| Atom labels | Wiberg bond index | Atom labels | Wiberg bond index | Atom labels | Wiberg bond index | Atom labels | Wiberg bond index |
| Sm1         | 0.0000            | Sm1         | 0.0000            | Sm1         | 0.0000            | Sm1         | 0.0000            |
| C2          | 0.1064            | C4          | 0.0946            | C6          | 0.1056            | C8          | 0.0946            |
| Atom labels | Wiberg bond index | Atom labels | Wiberg bond index | Atom labels | Wiberg bond index | Atom labels | Wiberg bond index |
| Sm1         | 0.0000            | Sm1         | 0.0000            | Sm1         | 0.0000            | Sm1         | 0.0000            |
| C10         | 0.1031            | C12         | 0.2335            | C14         | 0.2289            | C16         | 0.2371            |
| Atom labels | Wiberg bond index | Atom labels | Wiberg bond index | Atom labels | Wiberg bond index | Atom labels | Wiberg bond index |
| Sm1         | 0.0000            | Sm1         | 0.0000            | Sm1         | 0.0000            | Sm1         | 0.0000            |
| C18         | 0.2279            | C20         | 0.0924            | C22         | 0.1085            | C24         | 0.0933            |
| Atom labels | Wiberg bond index | Atom labels | Wiberg bond index | Atom labels | Wiberg bond index | Atom labels | Wiberg bond index |
| Sm1         | 0.0000            | Sm1         | 0.0000            | Sm1         | 0.0000            | Sm1         | 0.0000            |
| C26         | 0.1022            | C28         | 0.2347            | C30         | 0.2298            | C32         | 0.2317            |
| Atom labels | Wiberg bond index |             |                   |             |                   |             |                   |
| Sm1         | 0.0000            |             |                   |             |                   |             |                   |
| C34         | 0.2334            |             |                   |             |                   |             |                   |

**Table S44:** DFT computed NBO second-order perturbation analysis for **2-Sm-cis**.

| Donor NBO                                                                                                                                                    | Acceptor NBO                                                                                | E(2)<br>kcal/mol |
|--------------------------------------------------------------------------------------------------------------------------------------------------------------|---------------------------------------------------------------------------------------------|------------------|
| (0.44813) LP ( 6)Sm 1<br>s( 0.00%)p 0.00( 0.00%)d 1.00( 14.23%)f 6.03( 85.77%)g 0.00( 0.00%)                                                                 | 102. BD*( 2) C 12- C 14                                                                     | 5.74             |
| (0.44813) LP ( 6)Sm 1<br>s( 0.00%)p 0.00( 0.00%)d 1.00( 14.23%)f 6.03( 85.77%)g 0.00( 0.00%)                                                                 | 108. BD*( 2) C 16- C 18                                                                     | 4.99             |
| (0.44813) LP ( 6)Sm 1<br>s( 0.00%)p 0.00( 0.00%)d 1.00( 14.23%)f 6.03( 85.77%)g 0.00( 0.00%)                                                                 | 122. BD*( 2) C 28- C 30                                                                     | 5.18             |
| (0.44813) LP ( 6)Sm 1<br>s( 0.00%)p 0.00( 0.00%)d 1.00( 14.23%)f 6.03( 85.77%)g 0.00( 0.00%)                                                                 | 127. BD*( 2) C 32- C 34                                                                     | 4.43             |
| (0.52209) LP ( 1) C 2<br>s( 0.58%)p99.99( 99.41%)d 0.03( 0.02%)                                                                                              | (0.11000) LV ( 2)Sm 1<br>s( 0.00%)p 1.00( 0.12%)d99.99( 99.39%)f 3.95( 0.46%)g 0.24( 0.03%) | 6.39             |
| (0.98560) BD ( 1) C 2- C 4<br>( 50.07%) 0.7076* C 2 s( 37.05%)p 1.70( 62.89%)d 0.00( 0.06%)<br>( 49.93%) 0.7066* C 4 s( 37.36%)p 1.67( 62.58%)d 0.00( 0.06%) | (0.11000) LV ( 2)Sm 1<br>s( 0.00%)p 1.00( 0.12%)d99.99( 99.39%)f 3.95( 0.46%)g 0.24( 0.03%) | 3.25             |
| (0.98535) BD ( 1) C 4- C 6                                                                                                                                   | (0.10970) LV ( 3)Sm 1                                                                       | 4.02             |

|                                                                |                                                                     |      |
|----------------------------------------------------------------|---------------------------------------------------------------------|------|
| ( 50.06%) 0.7075* C 4 s( 37.12%)p 1.69( 62.82%)d 0.00( 0.06%)  | (s( 0.00%)p 1.00( 0.10%)d99.99( 99.68%)f 2.07( 0.20%)g 0.28( 0.03%) |      |
| ( 49.94%) 0.7067* C 6 s( 37.18%)p 1.69( 62.76%)d 0.00( 0.06%)  |                                                                     |      |
| (0.84089) BD ( 2) C 4- C 6                                     | (0.10970) LV ( 3)Sm 1                                               | 7.22 |
| ( 50.79%) 0.7127* C 4 s( 0.22%)p99.99( 99.74%)d 0.17( 0.04%)   | (s( 0.00%)p 1.00( 0.10%)d99.99( 99.68%)f 2.07( 0.20%)g 0.28( 0.03%) |      |
| ( 49.21%) 0.7015* C 6 s( 0.24%)p99.99( 99.72%)d 0.16( 0.04%)   |                                                                     |      |
| (0.98490) BD ( 1) C 6- C 8                                     | (0.10970) LV ( 3)Sm 1                                               | 3.87 |
| ( 50.01%) 0.7072* C 6 s( 37.33%)p 1.68( 62.61%)d 0.00( 0.06%)  | (s( 0.00%)p 1.00( 0.10%)d99.99( 99.68%)f 2.07( 0.20%)g 0.28( 0.03%) |      |
| ( 49.99%) 0.7070* C 8 s( 37.24%)p 1.68( 62.70%)d 0.00( 0.06%)  |                                                                     |      |
| (0.98581) BD ( 1) C 8- C 10                                    | (0.11000) LV ( 2)Sm 1                                               | 3.35 |
| ( 49.91%) 0.7065* C 8 s( 37.21%)p 1.69( 62.73%)d 0.00( 0.06%)  | (s( 0.00%)p 1.00( 0.12%)d99.99( 99.39%)f 3.95( 0.46%)g 0.24( 0.03%) |      |
| ( 50.09%) 0.7077* C 10 s( 37.18%)p 1.69( 62.77%)d 0.00( 0.06%) |                                                                     |      |
| (0.84421) BD ( 2) C 8- C 10                                    | (0.11000) LV ( 2)Sm 1                                               | 5.78 |
| ( 50.41%) 0.7100* C 8 s( 0.22%)p99.99( 99.75%)d 0.17( 0.04%)   | (s( 0.00%)p 1.00( 0.12%)d99.99( 99.39%)f 3.95( 0.46%)g 0.24( 0.03%) |      |
| ( 49.59%) 0.7042* C 10 s( 0.24%)p99.99( 99.73%)d 0.16( 0.04%)  |                                                                     |      |
| (0.98557) BD ( 1) C 10- C 26                                   | (0.11000) LV ( 2)Sm 1                                               | 3.85 |
| ( 50.00%) 0.7071* C 10 s( 37.29%)p 1.68( 62.65%)d 0.00( 0.06%) | (s( 0.00%)p 1.00( 0.12%)d99.99( 99.39%)f 3.95( 0.46%)g 0.24( 0.03%) |      |
| ( 50.00%) 0.7071* C 26 s( 37.28%)p 1.68( 62.66%)d 0.00( 0.06%) |                                                                     |      |
| (0.83984) BD ( 2) C 20- C 22                                   | (0.11000) LV ( 2)Sm 1                                               | 3.31 |
| ( 50.99%) 0.7141* C 20 s( 0.22%)p99.99( 99.74%)d 0.16( 0.04%)  | (s( 0.00%)p 1.00( 0.12%)d99.99( 99.39%)f 3.95( 0.46%)g 0.24( 0.03%) |      |
| ( 49.01%) 0.7001* C 22 s( 0.25%)p99.99( 99.71%)d 0.16( 0.04%)  |                                                                     |      |
| (0.83984) BD ( 2) C 20- C 22                                   | (0.10970) LV ( 3)Sm 1                                               | 3.51 |
| ( 50.99%) 0.7141* C 20 s( 0.22%)p99.99( 99.74%)d 0.16( 0.04%)  | (s( 0.00%)p 1.00( 0.10%)d99.99( 99.68%)f 2.07( 0.20%)g 0.28( 0.03%) |      |
| ( 49.01%) 0.7001* C 22 s( 0.25%)p99.99( 99.71%)d 0.16( 0.04%)  |                                                                     |      |
| (0.84575) BD ( 2) C 24- C 26                                   | (0.10970) LV ( 3)Sm 1                                               | 5.25 |
| ( 50.42%) 0.7101* C 24 s( 0.22%)p99.99( 99.75%)d 0.17( 0.04%)  | (s( 0.00%)p 1.00( 0.10%)d99.99( 99.68%)f 2.07( 0.20%)g 0.28( 0.03%) |      |
| ( 49.58%) 0.7041* C 26 s( 0.23%)p99.99( 99.73%)d 0.17( 0.04%)  |                                                                     |      |
| (0.98068) BD ( 1) C 12- C 14                                   | (0.10970) LV ( 3)Sm 1                                               | 7.41 |
| ( 50.08%) 0.7077* C 12 s( 36.19%)p 1.76( 63.75%)d 0.00( 0.06%) | (s( 0.00%)p 1.00( 0.10%)d99.99( 99.68%)f 2.07( 0.20%)g 0.28( 0.03%) |      |



|                                                                                                                                                                  |                                                                                              |       |
|------------------------------------------------------------------------------------------------------------------------------------------------------------------|----------------------------------------------------------------------------------------------|-------|
| ( 49.92%) 0.7065* C 14 s( 36.17%)p 1.76( 63.77%)d 0.00( 0.07%)                                                                                                   |                                                                                              |       |
| (0.86778) BD ( 2) C 12- C 14<br>( 49.66%) 0.7047* C 12 s( 1.05%)p94.28( 98.88%)d 0.06( 0.07%)<br>( 50.34%) 0.7095* C 14 s( 1.06%)p93.62( 98.88%)d 0.06( 0.07%)   | (0.18020) LV ( 1)Sm 1<br>s( 0.00%)p 0.00( 0.00%)d 1.00( 86.88%)f 0.15( 13.09%)g 0.00( 0.03%) | 5.67  |
| (0.86778) BD ( 2) C 12- C 14<br>( 49.66%) 0.7047* C 12 s( 1.05%)p94.28( 98.88%)d 0.06( 0.07%)<br>( 50.34%) 0.7095* C 14 s( 1.06%)p93.62( 98.88%)d 0.06( 0.07%)   | (0.10970) LV ( 3)Sm 1<br>s( 0.00%)p 1.00( 0.10%)d99.99( 99.68%)f 2.07( 0.20%)g 0.28( 0.03%)  | 10.29 |
| (0.86778) BD ( 2) C 12- C 14<br>( 49.66%) 0.7047* C 12 s( 1.05%)p94.28( 98.88%)d 0.06( 0.07%)<br>( 50.34%) 0.7095* C 14 s( 1.06%)p93.62( 98.88%)d 0.06( 0.07%)   | (0.04915) LV ( 5)Sm 1<br>s( 97.76%)p 0.01( 0.73%)d 0.01( 0.54%)f 0.01( 0.85%)g 0.00( 0.13%)  | 4.24  |
| (0.97846) BD ( 1) C 12- C 28<br>( 50.00%) 0.7071* C 12 s( 36.41%)p 1.74( 63.53%)d 0.00( 0.06%)<br>( 50.00%) 0.7071* C 28 s( 36.45%)p 1.74( 63.49%)d 0.00( 0.06%) | (0.11000) LV ( 2)Sm 1<br>s( 0.00%)p 1.00( 0.12%)d99.99( 99.39%)f 3.95( 0.46%)g 0.24( 0.03%)  | 10.03 |
| (0.97779) BD ( 1) C 14- C 16<br>( 49.99%) 0.7070* C 14 s( 36.33%)p 1.75( 63.60%)d 0.00( 0.07%)<br>( 50.01%) 0.7072* C 16 s( 36.50%)p 1.74( 63.43%)d 0.00( 0.07%) | (0.10970) LV ( 3)Sm 1<br>s( 0.00%)p 1.00( 0.10%)d99.99( 99.68%)f 2.07( 0.20%)g 0.28( 0.03%)  | 10.39 |
| (0.98070) BD ( 1) C 16- C 18<br>( 49.92%) 0.7066* C 16 s( 36.22%)p 1.76( 63.71%)d 0.00( 0.07%)<br>( 50.08%) 0.7077* C 18 s( 36.08%)p 1.77( 63.85%)d 0.00( 0.06%) | (0.11000) LV ( 2)Sm 1<br>s( 0.00%)p 1.00( 0.12%)d99.99( 99.39%)f 3.95( 0.46%)g 0.24( 0.03%)  | 7.24  |
| (0.86373) BD ( 2) C 16- C 18<br>( 49.18%) 0.7013* C 16 s( 1.04%)p94.97( 98.89%)d 0.07( 0.07%)<br>( 50.82%) 0.7129* C 18 s( 1.05%)p94.29( 98.89%)d 0.06( 0.07%)   | (0.18020) LV ( 1)Sm 1<br>s( 0.00%)p 0.00( 0.00%)d 1.00( 86.88%)f 0.15( 13.09%)g 0.00( 0.03%) | 6.59  |
| (0.86373) BD ( 2) C 16- C 18<br>( 49.18%) 0.7013* C 16 s( 1.04%)p94.97( 98.89%)d 0.07( 0.07%)<br>( 50.82%) 0.7129* C 18 s( 1.05%)p94.29( 98.89%)d 0.06( 0.07%)   | (0.11000) LV ( 2)Sm 1<br>s( 0.00%)p 1.00( 0.12%)d99.99( 99.39%)f 3.95( 0.46%)g 0.24( 0.03%)  | 9.87  |
| (0.86373) BD ( 2) C 16- C 18<br>( 49.18%) 0.7013* C 16 s( 1.04%)p94.97( 98.89%)d 0.07( 0.07%)<br>( 50.82%) 0.7129* C 18 s( 1.05%)p94.29( 98.89%)d 0.06( 0.07%)   | (0.10970) LV ( 3)Sm 1<br>s( 0.00%)p 1.00( 0.10%)d99.99( 99.68%)f 2.07( 0.20%)g 0.28( 0.03%)  | 3.07  |

|                                                                                                                                                                |                                                                                                 |       |
|----------------------------------------------------------------------------------------------------------------------------------------------------------------|-------------------------------------------------------------------------------------------------|-------|
| (0.86373) BD ( 2) C 16- C 18<br>( 49.18%) 0.7013* C 16 s( 1.04%)p94.97(98.89%)d 0.07( 0.07%)<br>( 50.82%) 0.7129* C 18 s( 1.05%)p94.29(98.89%)d 0.06( 0.07%)   | (0.04915) LV ( 5)Sm 1<br>s( 97.76%)p 0.01( 0.73%)d 0.01( 0.54%)f<br>0.01( 0.85%)g 0.00( 0.13%)  | 3.98  |
| (0.97838) BD ( 1) C 18- C 34<br>( 50.00%) 0.7071* C 18 s( 36.40%)p 1.75(63.53%)d 0.00( 0.06%)<br>( 50.00%) 0.7071* C 34 s( 36.44%)p 1.74(63.50%)d 0.00( 0.06%) | (0.11000) LV ( 2)Sm 1<br>s( 0.00%)p 1.00( 0.12%)d99.99( 99.39%)f<br>3.95( 0.46%)g 0.24( 0.03%)  | 11.81 |
| (0.98074) BD ( 1) C 28- C 30<br>( 50.10%) 0.7078* C 28 s( 36.15%)p 1.76(63.79%)d 0.00( 0.06%)<br>( 49.90%) 0.7064* C 30 s( 36.17%)p 1.76(63.76%)d 0.00( 0.07%) | (0.11000) LV ( 2)Sm 1<br>s( 0.00%)p 1.00( 0.12%)d99.99( 99.39%)f<br>3.95( 0.46%)g 0.24( 0.03%)  | 7.06  |
| (0.86485) BD ( 2) C 28- C 30<br>( 49.82%) 0.7058* C 28 s( 1.06%)p93.41(98.87%)d 0.06( 0.07%)<br>( 50.18%) 0.7084* C 30 s( 1.04%)p94.65(98.89%)d 0.06( 0.07%)   | (0.18020) LV ( 1)Sm 1<br>s( 0.00%)p 0.00( 0.00%)d 1.00( 86.88%)f<br>0.15( 13.09%)g 0.00( 0.03%) | 6.34  |
| (0.86485) BD ( 2) C 28- C 30<br>( 49.82%) 0.7058* C 28 s( 1.06%)p93.41(98.87%)d 0.06( 0.07%)<br>( 50.18%) 0.7084* C 30 s( 1.04%)p94.65(98.89%)d 0.06( 0.07%)   | (0.11000) LV ( 2)Sm 1<br>s( 0.00%)p 1.00( 0.12%)d99.99( 99.39%)f<br>3.95( 0.46%)g 0.24( 0.03%)  | 9.71  |
| (0.86485) BD ( 2) C 28- C 30<br>( 49.82%) 0.7058* C 28 s( 1.06%)p93.41(98.87%)d 0.06( 0.07%)<br>( 50.18%) 0.7084* C 30 s( 1.04%)p94.65(98.89%)d 0.06( 0.07%)   | (0.10970) LV ( 3)Sm 1<br>s( 0.00%)p 1.00( 0.10%)d99.99( 99.68%)f<br>2.07( 0.20%)g 0.28( 0.03%)  | 3.43  |
| (0.86485) BD ( 2) C 28- C 30<br>( 49.82%) 0.7058* C 28 s( 1.06%)p93.41(98.87%)d 0.06( 0.07%)<br>( 50.18%) 0.7084* C 30 s( 1.04%)p94.65(98.89%)d 0.06( 0.07%)   | (0.04915) LV ( 5)Sm 1<br>s( 97.76%)p 0.01( 0.73%)d 0.01( 0.54%)f<br>0.01( 0.85%)g 0.00( 0.13%)  | 4.04  |
| (0.97753) BD ( 1) C 30- C 32<br>( 49.97%) 0.7069* C 30 s( 36.34%)p 1.75(63.59%)d 0.00( 0.07%)<br>( 50.03%) 0.7073* C 32 s( 36.51%)p 1.74(63.42%)d 0.00( 0.07%) | (0.10970) LV ( 3)Sm 1<br>s( 0.00%)p 1.00( 0.10%)d99.99( 99.68%)f<br>2.07( 0.20%)g 0.28( 0.03%)  | 11.17 |
| (0.98074) BD ( 1) C 32- C 34<br>( 49.94%) 0.7067* C 32 s( 36.20%)p 1.76(63.73%)d 0.00( 0.07%)<br>( 50.06%) 0.7075* C 34 s( 36.03%)p 1.77(63.90%)d 0.00( 0.06%) | (0.10970) LV ( 3)Sm 1<br>s( 0.00%)p 1.00( 0.10%)d99.99( 99.68%)f<br>2.07( 0.20%)g 0.28( 0.03%)  | 7.14  |
| (0.86229) BD ( 2) C 32- C 34                                                                                                                                   | (0.18020) LV ( 1)Sm 1<br>s( 0.00%)p 0.00( 0.00%)d 1.00( 86.88%)f<br>0.15( 13.09%)g 0.00( 0.03%) | 7.09  |

|                                                                                                                                                              |                                                                                                |      |
|--------------------------------------------------------------------------------------------------------------------------------------------------------------|------------------------------------------------------------------------------------------------|------|
| ( 50.30%) 0.7092* C 32 s( 1.05%)p94.51(98.89%)d 0.06( 0.07%)<br>( 49.70%) 0.7050* C 34 s( 1.08%)p91.92(98.86%)d 0.06( 0.07%)                                 |                                                                                                |      |
| (0.86229) BD ( 2) C 32- C 34<br>( 50.30%) 0.7092* C 32 s( 1.05%)p94.51(98.89%)d 0.06( 0.07%)<br>( 49.70%) 0.7050* C 34 s( 1.08%)p91.92(98.86%)d 0.06( 0.07%) | (0.11000) LV ( 2)Sm 1<br>s( 0.00%)p 1.00( 0.12%)d99.99( 99.39%)f<br>3.95( 0.46%)g 0.24( 0.03%) | 3.37 |
| (0.86229) BD ( 2) C 32- C 34<br>( 50.30%) 0.7092* C 32 s( 1.05%)p94.51(98.89%)d 0.06( 0.07%)<br>( 49.70%) 0.7050* C 34 s( 1.08%)p91.92(98.86%)d 0.06( 0.07%) | (0.10970) LV ( 3)Sm 1<br>s( 0.00%)p 1.00( 0.10%)d99.99( 99.68%)f<br>2.07( 0.20%)g 0.28( 0.03%) | 9.75 |
| (0.86229) BD ( 2) C 32- C 34<br>( 50.30%) 0.7092* C 32 s( 1.05%)p94.51(98.89%)d 0.06( 0.07%)<br>( 49.70%) 0.7050* C 34 s( 1.08%)p91.92(98.86%)d 0.06( 0.07%) | (0.04915) LV ( 5)Sm 1<br>s( 97.76%)p 0.01( 0.73%)d 0.01( 0.54%)f<br>0.01( 0.85%)g 0.00( 0.13%) | 4.16 |

*Table S45: NBO analysis of canonical molecular orbitals for 2-Sm-cis.*

|                                                                                                                                                                                                                            |                                                                                                                                                                                                                                                                                                                                                                                                                                                                                                                                                                                                                                                                                                                                                        |
|----------------------------------------------------------------------------------------------------------------------------------------------------------------------------------------------------------------------------|--------------------------------------------------------------------------------------------------------------------------------------------------------------------------------------------------------------------------------------------------------------------------------------------------------------------------------------------------------------------------------------------------------------------------------------------------------------------------------------------------------------------------------------------------------------------------------------------------------------------------------------------------------------------------------------------------------------------------------------------------------|
| HOMO-3, MO 76 (occ): orbital energy = - 0.23005 a.u.<br>-0.454*[ 69]: BD ( 2) C24- C26<br>0.452*[ 48]: BD ( 2) C 8- C10<br>0.397*[ 64]: BD ( 2) C20- C22<br>-0.396*[ 43]: BD ( 2) C 4- C 6<br>0.271*[ 80]: LV ( 1)Sm 1(lv) | (0.84575) BD ( 2) C 24- C 26<br>( 50.42%) 0.7101* C 24 s( 0.22%)p99.99(99.75%)d 0.17( 0.04%)<br>( 49.58%) 0.7041* C 26 s( 0.23%)p99.99(99.73%)d 0.17( 0.04%)<br>(0.84421) BD ( 2) C 8- C 10<br>( 50.41%) 0.7100* C 8 s( 0.22%)p99.99(99.75%)d 0.17( 0.04%)<br>( 49.59%) 0.7042* C 10 s( 0.24%)p99.99(99.73%)d 0.16( 0.04%)<br>(0.83984) BD ( 2) C 20- C 22<br>( 50.99%) 0.7141* C 20 s( 0.22%)p99.99(99.74%)d 0.16( 0.04%)<br>( 49.01%) 0.7001* C 22 s( 0.25%)p99.99(99.71%)d 0.16( 0.04%)<br>(0.84089) BD ( 2) C 4- C 6<br>( 50.79%) 0.7127* C 4 s( 0.22%)p99.99(99.74%)d 0.17( 0.04%)<br>( 49.21%) 0.7015* C 6 s( 0.24%)p99.99(99.72%)d 0.16( 0.04%)<br>(0.18020) LV ( 1)Sm 1<br>s( 0.00%)p 0.00( 0.00%)d 1.00( 86.88%) f 0.15(13.09%)g 0.00( 0.03%) |
| HOMO-2, MO 77 (occ): orbital energy = - 0.22804 a.u.<br>0.433*[ 37]: LP ( 1) C 2(lp)<br>0.387*[ 97]: BD*( 2) C 8- C10*                                                                                                     | (0.52209) LP ( 1) C 2<br>s( 0.58%)p99.99( 99.41%)d 0.03( 0.02%)<br>(0.21317) BD*( 2) C 8- C 10                                                                                                                                                                                                                                                                                                                                                                                                                                                                                                                                                                                                                                                         |

|                                                                                                                                                                                                                                                |                                                                                                                                                                                                                                                                                                                                                                                                                                                                                                                                                                                                                                                                                                                                                                                                                                                                                                                                                                                                                                                                                                                                                          |
|------------------------------------------------------------------------------------------------------------------------------------------------------------------------------------------------------------------------------------------------|----------------------------------------------------------------------------------------------------------------------------------------------------------------------------------------------------------------------------------------------------------------------------------------------------------------------------------------------------------------------------------------------------------------------------------------------------------------------------------------------------------------------------------------------------------------------------------------------------------------------------------------------------------------------------------------------------------------------------------------------------------------------------------------------------------------------------------------------------------------------------------------------------------------------------------------------------------------------------------------------------------------------------------------------------------------------------------------------------------------------------------------------------------|
| <p>0.386*[118]: BD*( 2) C24- C26*<br/> -0.343*[ 92]: BD*( 2) C 4- C 6*<br/> -0.343*[113]: BD*( 2) C20- C22*<br/> 0.297*[ 83]: LV ( 4)Sm 1(lv)<br/> -0.230*[ 43]: BD ( 2) C 4- C 6<br/> -0.229*[ 64]: BD ( 2) C20- C22</p>                      | <p>( 49.59%) 0.7042* C 8 s( 0.22%)p99.99( 99.75%)d 0.17( 0.04%)<br/> ( 50.41%) -0.7100* C 10 s( 0.24%)p99.99( 99.73%)d 0.16( 0.04%)<br/> <u>(0.21339) BD*( 2) C 24- C 26</u><br/> ( 49.58%) 0.7041* C 24 s( 0.22%)p99.99( 99.75%)d 0.17( 0.04%)<br/> ( 50.42%) -0.7101* C 26 s( 0.23%)p99.99( 99.73%)d 0.17( 0.04%)<br/> <u>(0.21588) BD*( 2) C 4- C 6</u><br/> ( 49.21%) 0.7015* C 4 s( 0.22%)p99.99( 99.74%)d 0.17( 0.04%)<br/> <u>(0.21684) BD*( 2) C 20- C 22</u><br/> ( 49.01%) 0.7001* C 20 s( 0.22%)p99.99( 99.74%)d 0.16( 0.04%)<br/> ( 50.99%) -0.7141* C 22 s( 0.25%)p99.99( 99.71%)d 0.16( 0.04%)<br/> ( 50.79%) -0.7127* C 6 s( 0.24%)p99.99( 99.72%)d 0.16( 0.04%)<br/> <u>(0.10344) LV ( 4)Sm 1</u><br/> s( 0.00%)p 0.00( 0.01%)d 1.00( 86.44%)f 0.16( 13.52%)g 0.00( 0.03%)<br/> <u>(0.84089) BD ( 2) C 4- C 6</u><br/> ( 50.79%) 0.7127* C 4 s( 0.22%)p99.99( 99.74%)d 0.17( 0.04%)<br/> ( 49.21%) 0.7015* C 6 s( 0.24%)p99.99( 99.72%)d 0.16( 0.04%)<br/> <u>(0.83984) BD ( 2) C 20- C 22</u><br/> ( 50.99%) 0.7141* C 20 s( 0.22%)p99.99( 99.74%)d 0.16( 0.04%)<br/> ( 49.01%) 0.7001* C 22 s( 0.25%)p99.99( 99.71%)d 0.16( 0.04%)</p> |
| <p>HOMO-1, MO 78 (occ): orbital energy = - 0.18203 a.u.<br/> 0.659*[ 36]: LP ( 6)Sm 1(lp)<br/> 0.353*[127]: BD*( 2) C32- C34*<br/> -0.352*[108]: BD*( 2) C16- C18*<br/> 0.352*[122]: BD*( 2) C28- C30*<br/> 0.351*[102]: BD*( 2) C12- C14*</p> | <p><u>(0.44813) LP ( 6)Sm 1</u><br/> s( 0.00%)p 0.00( 0.00%)d 1.00( 14.23%)f 6.03( 85.77%)g 0.00( 0.00%)<br/> <u>(0.20409) BD*( 2) C 32- C 34</u><br/> ( 49.70%) 0.7050* C 32 s( 1.05%)p94.51( 98.89%)d 0.06( 0.07%)<br/> ( 50.30%) -0.7092* C 34 s( 1.08%)p91.92( 98.86%)d 0.06( 0.07%)<br/> <u>(0.20421) BD*( 2) C 16- C 18</u><br/> ( 50.82%) 0.7129* C 16 s( 1.04%)p94.97( 98.89%)d 0.07( 0.07%)<br/> ( 49.18%) -0.7013* C 18 s( 1.05%)p94.29( 98.89%)d 0.06( 0.07%)<br/> <u>(0.20428) BD*( 2) C 28- C 30</u><br/> ( 50.18%) 0.7084* C 28 s( 1.06%)p93.41( 98.87%)d 0.06( 0.07%)<br/> ( 49.82%) -0.7058* C 30 s( 1.04%)p94.65( 98.89%)d 0.06( 0.07%)<br/> <u>(0.20441) BD*( 2) C 12- C 14</u></p>                                                                                                                                                                                                                                                                                                                                                                                                                                                    |

|                                                   |                                                                                                                                                                                                                                                                                                                                                                                                                                                                                                                                                                                                                                                                                                                                                                      |
|---------------------------------------------------|----------------------------------------------------------------------------------------------------------------------------------------------------------------------------------------------------------------------------------------------------------------------------------------------------------------------------------------------------------------------------------------------------------------------------------------------------------------------------------------------------------------------------------------------------------------------------------------------------------------------------------------------------------------------------------------------------------------------------------------------------------------------|
|                                                   | ( 50.34%) 0.7095* C 12 s( 1.05%)p94.28( 98.88%)d 0.06( 0.07%)<br>( 49.66%) -0.7047* C 14 s( 1.06%)p93.62( 98.88%)d 0.06( 0.07%)                                                                                                                                                                                                                                                                                                                                                                                                                                                                                                                                                                                                                                      |
| HOMO, MO 79 (occ): orbital energy = -0.17642 a.u. | (0.86778) BD ( 2) C 12- C 14<br>( 49.66%) 0.7047* C 12 s( 1.05%)p94.28( 98.88%)d 0.06( 0.07%)<br>( 50.34%) 0.7095* C 14 s( 1.06%)p93.62( 98.88%)d 0.06( 0.07%)<br>(0.86485) BD ( 2) C 28- C 30<br>( 49.82%) 0.7058* C 28 s( 1.06%)p93.41( 98.87%)d 0.06( 0.07%)<br>( 50.18%) 0.7084* C 30 s( 1.04%)p94.65( 98.89%)d 0.06( 0.07%)<br>(0.86373) BD ( 2) C 16- C 18<br>( 49.18%) 0.7013* C 16 s( 1.04%)p94.97( 98.89%)d 0.07( 0.07%)<br>( 50.82%) 0.7129* C 18 s( 1.05%)p94.29( 98.89%)d 0.06( 0.07%)<br>(0.86229) BD ( 2) C 32- C 34<br>( 50.30%) 0.7092* C 32 s( 1.05%)p94.51( 98.89%)d 0.06( 0.07%)<br>( 49.70%) 0.7050* C 34 s( 1.08%)p91.92( 98.86%)d 0.06( 0.07%)<br>(0.18020) LV ( 1)Sm 1<br>s( 0.00%)p 0.00( 0.00%)d 1.00( 86.88%)f 0.15( 13.09%)g 0.00( 0.03%) |

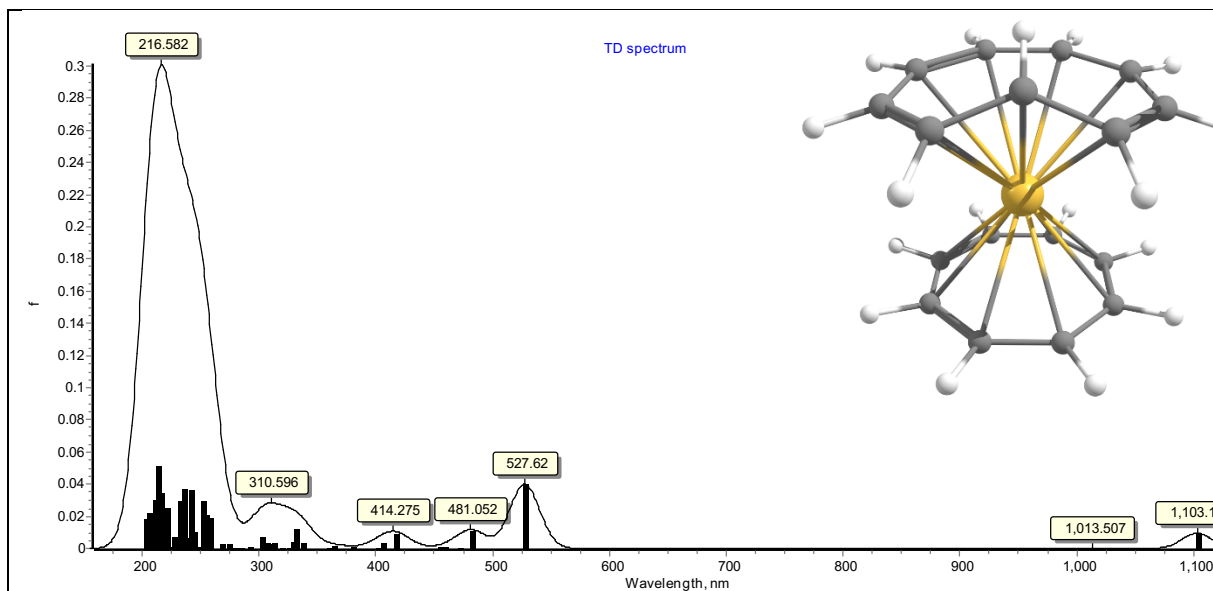

Figure S92: Computed TD spectrum for 2-Sm-trans.

|                                                                                                                                                                                                                                                                                                                                                      |                                                                                                |                                                                                                  |
|------------------------------------------------------------------------------------------------------------------------------------------------------------------------------------------------------------------------------------------------------------------------------------------------------------------------------------------------------|------------------------------------------------------------------------------------------------|--------------------------------------------------------------------------------------------------|
| <p>79A, 74B: HOMO</p> <p>Excited <u>State 12</u>: 6.255-?Sym<br/> 1.1242 eV 1102.88 nm<br/> f=0.0094 &lt;S**2&gt;=9.532</p> <p><b>78A -&gt; 80A 0.91156</b><br/> 79A -&gt; 81A -0.27684<br/> 79A -&gt; 82A -0.31260<br/> 79A -&gt; 82A -0.12342</p>                                                                                                  | 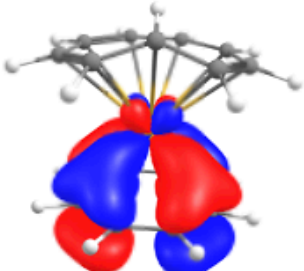 <p>78A</p>   |  <p>80A</p>   |
| <p>Excited <u>State 15</u>: 6.407-?Sym<br/> 2.3506 eV 527.45 nm<br/> f=0.0398 &lt;S**2&gt;=10.014</p> <p><b>76A -&gt; 80A 0.79104</b><br/> 78A -&gt; 80A -0.19066<br/> 79A -&gt; 81A -0.51500<br/> 79A -&gt; 82A -0.10772<br/> 72B -&gt; 75B -0.13367<br/> 73B -&gt; 75B 0.10460</p>                                                                 |  <p>76A</p>   |  <p>80A</p>   |
| <p>Excited <u>State 16</u>: 6.574-?Sym<br/> 2.5750 eV 481.50 nm<br/> f=0.0113 &lt;S**2&gt;=10.554</p> <p>76A -&gt; 80A 0.52647<br/> 77A -&gt; 81A -0.12639<br/> 77A -&gt; 82A 0.16114<br/> 78A -&gt; 80A 0.13041</p> <p><b>79A -&gt; 81A 0.64458</b><br/> 79A -&gt; 82A -0.22160<br/> 72B -&gt; 75B 0.19522<br/> 73B -&gt; 75B -0.37388</p>          |  <p>79A</p>  |  <p>81A</p>  |
| <p>Excited <u>State 20</u>: 6.260-?Sym<br/> 2.9718 eV 417.20 nm<br/> f=0.0084 &lt;S**2&gt;=9.548</p> <p>76A -&gt; 80A 0.11676<br/> 78A -&gt; 80A 0.20975<br/> 79A -&gt; 81A -0.19456</p> <p><b>79A -&gt; 82A 0.76280</b><br/> 79A -&gt; 84A -0.10641<br/> 73B -&gt; 75B -0.47181<br/> 74B -&gt; 76B -0.25561</p>                                     |  <p>79A</p> |  <p>82A</p> |
| <p>Excited <u>State 29</u>: 6.460-?Sym<br/> 3.7475 eV 330.84 nm<br/> f=0.0118 &lt;S**2&gt;=10.182</p> <p>73A -&gt; 82A -0.11253<br/> 75A -&gt; 81A -0.37725<br/> 75A -&gt; 84A -0.14879<br/> 76A -&gt; 83A 0.27591</p> <p><b>77A -&gt; 81A 0.53057</b><br/> <b>77A -&gt; 82A 0.48288</b><br/> 78A -&gt; 83A -0.11078<br/> 71B -&gt; 76B -0.36449</p> |  <p>77A</p> |  <p>81A</p> |

|                                                                                                                                                                                                                                                                                                                                                                                                           |                                                                                                |                                                                                                  |
|-----------------------------------------------------------------------------------------------------------------------------------------------------------------------------------------------------------------------------------------------------------------------------------------------------------------------------------------------------------------------------------------------------------|------------------------------------------------------------------------------------------------|--------------------------------------------------------------------------------------------------|
| <p>72B -&gt; 75B 0.11989<br/>74B -&gt; 76B 0.16455</p>                                                                                                                                                                                                                                                                                                                                                    |                                                                                                | 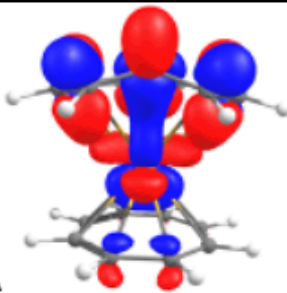 <p>82A</p>   |
| <p>Excited State 39: 6.167-?Sym<br/>4.1003 eV 302.38 nm<br/>f=0.0045 &lt;S**2&gt;=9.258</p> <p>74A -&gt; 81A 0.13868<br/>74A -&gt; 82A -0.16755<br/>76A -&gt; 81A 0.24562<br/>76A -&gt; 82A -0.55227<br/>77A -&gt; 83A 0.38545<br/><b>71B -&gt; 75B 0.56034</b><br/>72B -&gt; 76B 0.29581</p>                                                                                                             |  <p>71B</p>   |  <p>75B</p>   |
| <p>Excited State 40: 6.165-?Sym<br/>4.1010 eV 302.32 nm<br/>f=0.0072 &lt;S**2&gt;=9.252</p> <p>72A -&gt; 81A -0.28104<br/>72A -&gt; 82A 0.26941<br/>72A -&gt; 84A -0.15225<br/>73A -&gt; 82A -0.11594<br/>75A -&gt; 81A 0.12878<br/>75A -&gt; 82A -0.20150<br/>76A -&gt; 83A 0.28849<br/>77A -&gt; 81A -0.25645<br/><b>77A -&gt; 82A 0.53432</b><br/>71B -&gt; 76B 0.22393<br/>72B -&gt; 75B -0.48611</p> |  <p>77A</p>  |  <p>82A</p>  |
| <p>Excited State 52: 6.258-?Sym<br/>4.8246 eV 256.98 nm<br/>f=0.0190 &lt;S**2&gt;=9.541</p> <p>66A -&gt; 80A -0.13806<br/>74A -&gt; 83A -0.46745<br/>75A -&gt; 81A -0.17572<br/>75A -&gt; 82A 0.18132<br/>75A -&gt; 84A 0.35394<br/>76A -&gt; 83A 0.29120<br/><b>77A -&gt; 84A 0.56223</b><br/>79A -&gt; 86A 0.11401<br/>71B -&gt; 76B 0.27639</p>                                                        |  <p>77A</p> |  <p>84A</p> |



|                                                                                                                                                                                                                                                                                                                                                                                                   |                                                                                                |                                                                                                  |
|---------------------------------------------------------------------------------------------------------------------------------------------------------------------------------------------------------------------------------------------------------------------------------------------------------------------------------------------------------------------------------------------------|------------------------------------------------------------------------------------------------|--------------------------------------------------------------------------------------------------|
| <p>Excited <u>State 54</u>: 6.196-?Sym<br/> 4.8691 eV 254.63 nm<br/> f=0.0206 &lt;S**2&gt;=9.346</p> <p>68A -&gt; 80A 0.15460<br/> <b>73A -&gt; 83A 0.77626</b><br/> 75A -&gt; 83A -0.14989<br/> 76A -&gt; 82A 0.10511<br/> 76A -&gt; 84A -0.39828<br/> 77A -&gt; 83A 0.27427<br/> 71B -&gt; 75B -0.10504<br/> 72B -&gt; 76B 0.23454</p>                                                          | 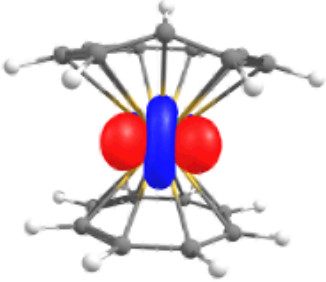 <p>73A</p>   |  <p>83A</p>   |
| <p>Excited <u>State 56</u>: 6.247-?Sym<br/> 4.9174 eV 252.13 nm<br/> f=0.0286 &lt;S**2&gt;=9.507</p> <p>68A -&gt; 80A -0.22767<br/> 72A -&gt; 83A 0.10181<br/> <b>73A -&gt; 83A 0.62289</b><br/> 75A -&gt; 83A 0.13344<br/> 76A -&gt; 81A 0.10964<br/> 76A -&gt; 82A -0.13490<br/> 76A -&gt; 84A 0.53905<br/> 77A -&gt; 83A -0.27968<br/> 72B -&gt; 76B -0.28954</p>                              |  <p>73A</p>   |  <p>83A</p>   |
| <p>Excited <u>State 57</u>: 6.189-?Sym<br/> 4.9294 eV 251.52 nm<br/> f=0.0291 &lt;S**2&gt;=9.327</p> <p>66A -&gt; 80A 0.19499<br/> 74A -&gt; 83A -0.22906<br/> 75A -&gt; 81A -0.15243<br/> 75A -&gt; 82A 0.14133<br/> <b>75A -&gt; 84A 0.68134</b><br/> 76A -&gt; 83A -0.36165<br/> 77A -&gt; 81A -0.12308<br/> 77A -&gt; 82A 0.14635<br/> 77A -&gt; 84A -0.21633<br/> 71B -&gt; 76B -0.37170</p> |  <p>75A</p> |  <p>84A</p> |
| <p>Excited <u>State 59</u>: 6.300-?Sym<br/> 5.0847 eV 243.84 nm<br/> f=0.0106 &lt;S**2&gt;=9.673</p> <p>67A -&gt; 80A -0.21485<br/> <b>68A -&gt; 80A 0.58194</b><br/> 74A -&gt; 81A 0.16413<br/> 74A -&gt; 82A -0.16473<br/> 74A -&gt; 84A -0.53823<br/> 76A -&gt; 84A 0.34480<br/> 77A -&gt; 83A 0.16627<br/> 71B -&gt; 78B -0.21467<br/> 72B -&gt; 76B 0.10277</p>                              |  <p>68A</p> |  <p>80A</p> |



|                                                                                                                                                                                                                                                                                                                                                                                                                                                                                                                |                                                                                                |                                                                                                  |
|----------------------------------------------------------------------------------------------------------------------------------------------------------------------------------------------------------------------------------------------------------------------------------------------------------------------------------------------------------------------------------------------------------------------------------------------------------------------------------------------------------------|------------------------------------------------------------------------------------------------|--------------------------------------------------------------------------------------------------|
| <p>Excited <u>State 63</u>: 6.435-?Sym<br/> 5.1402 eV 241.20 nm<br/> f=0.0361 &lt;S**2&gt;=10.102</p> <p>65A -&gt; 80A 0.17559<br/> 66A -&gt; 80A -0.14967<br/> 71A -&gt; 83A -0.11361<br/> 73A -&gt; 81A 0.11296<br/> 73A -&gt; 82A -0.10705<br/> 73A -&gt; 84A -0.35181<br/> 75A -&gt; 84A 0.25689<br/> 76A -&gt; 83A 0.33033<br/> 77A -&gt; 84A -0.40775<br/> 79A -&gt; 86A 0.10009<br/> 71B -&gt; 76B 0.24768<br/> 72B -&gt; 75B 0.17312<br/> <b>72B -&gt; 78B 0.49979</b><br/> 73B -&gt; 81B -0.11059</p> | 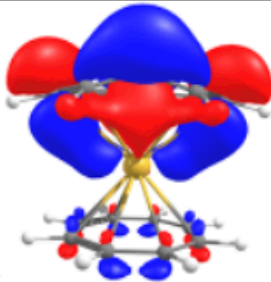 <p>72B</p>   |  <p>78B</p>   |
| <p>Excited <u>State 64</u>: 6.241-?Sym<br/> 5.2057 eV 238.17 nm<br/> f=0.0056 &lt;S**2&gt;=9.487</p> <p>73A -&gt; 81A -0.25764<br/> 73A -&gt; 82A 0.24877<br/> <b>73A -&gt; 84A 0.80426</b><br/> 74A -&gt; 83A 0.11084<br/> 75A -&gt; 84A 0.11427<br/> 77A -&gt; 84A -0.16855<br/> 72B -&gt; 78B 0.30126</p>                                                                                                                                                                                                   |  <p>73A</p>  |  <p>84A</p>  |
| <p>Excited <u>State 65</u>: 6.325-?Sym<br/> 5.2326 eV 236.95 nm<br/> f=0.0064 &lt;S**2&gt;=9.750</p> <p>65A -&gt; 80A -0.18169<br/> <b>66A -&gt; 80A 0.86962</b><br/> 72A -&gt; 84A -0.14178<br/> 77A -&gt; 84A 0.20327<br/> 71B -&gt; 76B 0.12293<br/> 72B -&gt; 78B 0.23330</p>                                                                                                                                                                                                                              |  <p>66A</p> |  <p>80A</p> |
| <p>Excited <u>State 66</u>: 6.397-?Sym<br/> 5.2522 eV 236.06 nm<br/> f=0.0372 &lt;S**2&gt;=9.981</p> <p>59A -&gt; 80A -0.10695<br/> 61A -&gt; 80A -0.12509<br/> <b>64A -&gt; 80A 0.65707</b><br/> 68A -&gt; 80A 0.27642<br/> 74A -&gt; 84A -0.16231<br/> 76A -&gt; 84A -0.28062<br/> 77A -&gt; 83A -0.23188<br/> 71B -&gt; 75B 0.15719<br/> 71B -&gt; 78B 0.36429<br/> 72B -&gt; 76B -0.19757<br/> 74B -&gt; 81B 0.15056</p>                                                                                   |  <p>64A</p> |  <p>80A</p> |

|                                                                                                                                                                                                                                                                                                                                                                                                                                                                                                                                     |                                                                                                |                                                                                                  |
|-------------------------------------------------------------------------------------------------------------------------------------------------------------------------------------------------------------------------------------------------------------------------------------------------------------------------------------------------------------------------------------------------------------------------------------------------------------------------------------------------------------------------------------|------------------------------------------------------------------------------------------------|--------------------------------------------------------------------------------------------------|
| <p>Excited State 68: 6.377-?Sym<br/> 5.3385 eV 232.25 nm<br/> f=0.0292 &lt;S**2&gt;=9.917</p> <p>61A -&gt; 80A -0.10605<br/> <b>64A -&gt; 80A 0.64638</b><br/> 68A -&gt; 80A -0.39719<br/> 77A -&gt; 83A 0.16568<br/> 78A -&gt; 88A -0.18745<br/> 78A -&gt; 89A -0.10685<br/> 71B -&gt; 75B -0.13342<br/> 71B -&gt; 78B -0.41499<br/> 72B -&gt; 76B 0.17251<br/> 74B -&gt; 81B -0.17579</p>                                                                                                                                         | 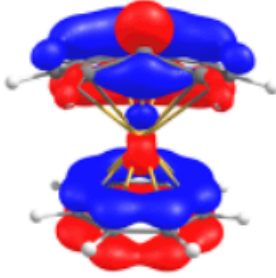 <p>64A</p>   |  <p>80A</p>   |
| <p>Excited State 70: 6.142-?Sym<br/> 5.3953 eV 229.80 nm<br/> f=0.0042 &lt;S**2&gt;=9.180</p> <p><b>71A -&gt; 83A 0.97891</b></p>                                                                                                                                                                                                                                                                                                                                                                                                   |  <p>71A</p>   |  <p>83A</p>   |
| <p>Excited State 72: 6.262-?Sym<br/> 5.4601 eV 227.07 nm<br/> f=0.0074 &lt;S**2&gt;=9.552</p> <p>78A -&gt; 86A 0.48848<br/> <b>78A -&gt; 88A 0.51496</b><br/> 78A -&gt; 89A 0.25462<br/> 78A -&gt; 92A 0.12499<br/> 79A -&gt; 87A -0.40063<br/> 71B -&gt; 78B -0.14086<br/> 73B -&gt; 79B 0.32867<br/> 74B -&gt; 80B -0.20562<br/> 74B -&gt; 81B 0.10247</p>                                                                                                                                                                        |  <p>78A</p>  |  <p>88A</p>  |
| <p>Excited State 80: 6.600-?Sym<br/> 5.6341 eV 220.06 nm<br/> f=0.0255 &lt;S**2&gt;=10.639</p> <p>63A -&gt; 80A 0.24782<br/> 66A -&gt; 80A 0.13198<br/> 68A -&gt; 81A 0.15108<br/> 77A -&gt; 84A -0.18722<br/> 77A -&gt; 85A -0.13934<br/> 78A -&gt; 90A 0.36632<br/> 78A -&gt; 91A -0.16036<br/> 79A -&gt; 86A -0.12816<br/> <b>79A -&gt; 88A 0.51868</b><br/> 79A -&gt; 89A 0.20985<br/> 68B -&gt; 75B -0.13817<br/> 73B -&gt; 81B 0.37245<br/> 73B -&gt; 84B -0.20203<br/> 73B -&gt; 91B -0.12245<br/> 74B -&gt; 90B 0.16536</p> |  <p>79A</p> |  <p>88A</p> |

|                                                                                                                                                                                                                                                                                                                                                                                                                                                                                                                                                                                                                                                                                                                |                                                                                                |                                                                                                  |
|----------------------------------------------------------------------------------------------------------------------------------------------------------------------------------------------------------------------------------------------------------------------------------------------------------------------------------------------------------------------------------------------------------------------------------------------------------------------------------------------------------------------------------------------------------------------------------------------------------------------------------------------------------------------------------------------------------------|------------------------------------------------------------------------------------------------|--------------------------------------------------------------------------------------------------|
| <p>Excited <u>State 83</u>: 6.333-?Sym<br/> 5.6888 eV 217.94 nm<br/> f=0.0182 &lt;S**2&gt;=9.778</p> <p>61A -&gt; 80A -0.18809<br/> 69A -&gt; 81A -0.12391<br/> 71A -&gt; 84A -0.10348<br/> 76A -&gt; 84A 0.24690<br/> 77A -&gt; 83A 0.11490<br/> 79A -&gt; 87A 0.13430<br/> 71B -&gt; 77B -0.47020<br/> 72B -&gt; 76B 0.12729<br/> 73B -&gt; 79B -0.10626<br/> <b>74B -&gt; 81B 0.56918</b><br/> 74B -&gt; 82B -0.36860</p>                                                                                                                                                                                                                                                                                   | 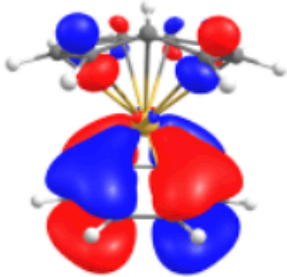 <p>74B</p>   |  <p>81B</p>   |
| <p>Excited <u>State 85</u>: 6.287-?Sym<br/> 5.7352 eV 216.18 nm<br/> f=0.0347 &lt;S**2&gt;=9.631</p> <p>62A -&gt; 80A 0.15318<br/> 66A -&gt; 80A -0.19793<br/> 68A -&gt; 81A -0.17144<br/> 68A -&gt; 82A 0.11191<br/> 70A -&gt; 82A -0.13679<br/> 75A -&gt; 84A -0.11734<br/> 76A -&gt; 83A -0.18273<br/> 77A -&gt; 84A 0.31358<br/> 78A -&gt; 87A 0.21185<br/> 78A -&gt; 90A 0.14042<br/> 79A -&gt; 86A -0.18781<br/> 79A -&gt; 88A 0.27720<br/> 79A -&gt; 89A 0.11669<br/> 71B -&gt; 76B -0.16284<br/> 72B -&gt; 75B -0.13836<br/> <b>72B -&gt; 78B 0.48861</b><br/> 73B -&gt; 80B 0.10023<br/> 73B -&gt; 81B -0.23867<br/> 73B -&gt; 82B 0.17602<br/> 74B -&gt; 79B -0.10267<br/> 74B -&gt; 90B 0.11614</p> |  <p>72B</p>   |  <p>78B</p>   |
| <p>Excited <u>State 86</u>: 6.317-?Sym<br/> 5.7365 eV 216.13 nm<br/> f=0.0099 &lt;S**2&gt;=9.725</p> <p>60A -&gt; 80A 0.21398<br/> 61A -&gt; 80A -0.14152<br/> 76A -&gt; 84A 0.14917<br/> 71B -&gt; 78B 0.16889<br/> 74B -&gt; 81B 0.11287<br/> <b>74B -&gt; 82B 0.78376</b><br/> 74B -&gt; 84B -0.39664</p>                                                                                                                                                                                                                                                                                                                                                                                                   |  <p>74B</p> |  <p>82B</p> |

|                                                                                                                                                                                                                                                                                                                                                                                                                                                             |                                                                                                                                                                                            |                                                                                                                                                                                                 |
|-------------------------------------------------------------------------------------------------------------------------------------------------------------------------------------------------------------------------------------------------------------------------------------------------------------------------------------------------------------------------------------------------------------------------------------------------------------|--------------------------------------------------------------------------------------------------------------------------------------------------------------------------------------------|-------------------------------------------------------------------------------------------------------------------------------------------------------------------------------------------------|
| <p>Excited <u>State 87</u>: 6.329-?Sym<br/> 5.7749 eV 214.69 nm<br/> f=0.0089 &lt;S**2&gt;=9.763</p> <p>59A -&gt; 80A 0.22360<br/> 60A -&gt; 80A -0.18872<br/> <b>61A -&gt; 80A 0.64513</b><br/> 64A -&gt; 80A 0.11646<br/> 76A -&gt; 84A -0.13443<br/> 79A -&gt; 90A 0.20198<br/> 71B -&gt; 77B -0.16110<br/> 71B -&gt; 78B -0.27971<br/> 74B -&gt; 81B 0.38528<br/> 74B -&gt; 82B 0.16220<br/> 74B -&gt; 84B -0.11783</p>                                 | 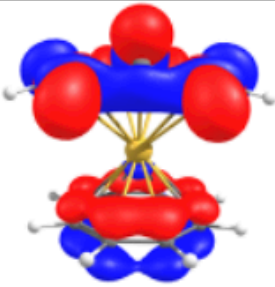 <p>61A</p>                                                                                               |  <p>80A</p>                                                                                                  |
| <p>Excited <u>State 88</u>: 6.321-?Sym<br/> 5.8292 eV 212.69 nm<br/> f=0.0514 &lt;S**2&gt;=9.739</p> <p>59A -&gt; 80A 0.12389<br/> 60A -&gt; 80A -0.19070<br/> <b>61A -&gt; 80A 0.47172</b><br/> 64A -&gt; 80A 0.19658<br/> 76A -&gt; 84A 0.26480<br/> 77A -&gt; 83A 0.15804<br/> 78A -&gt; 88A 0.14695<br/> 79A -&gt; 90A -0.38398<br/> 79A -&gt; 91A 0.24363<br/> 71B -&gt; 75B -0.12486<br/> <b>71B -&gt; 78B 0.41846</b><br/> 72B -&gt; 76B 0.16752</p> |  <p>61A</p>  <p>71B</p> |  <p>80A</p>  <p>78B</p> |
| <p>Excited <u>State 89</u>: 6.449-?Sym<br/> 5.8422 eV 212.22 nm<br/> f=0.0107 &lt;S**2&gt;=10.146</p> <p>61A -&gt; 80A 0.17481<br/> 76A -&gt; 84A 0.12524<br/> 78A -&gt; 88A -0.16532<br/> 78A -&gt; 94A 0.10344<br/> <b>79A -&gt; 90A 0.69364</b><br/> 79A -&gt; 91A -0.26914<br/> 79A -&gt; 93A 0.10164<br/> 71B -&gt; 77B 0.13687<br/> 71B -&gt; 78B 0.31240<br/> 74B -&gt; 81B -0.31487<br/> 74B -&gt; 82B -0.17071</p>                                 |  <p>79A</p>                                                                                             |  <p>90A</p>                                                                                                |



|                                                                                                                                                                                                                                                                                                                                                                                                                                                                                                                                                                        |                                                                                                |                                                                                                  |
|------------------------------------------------------------------------------------------------------------------------------------------------------------------------------------------------------------------------------------------------------------------------------------------------------------------------------------------------------------------------------------------------------------------------------------------------------------------------------------------------------------------------------------------------------------------------|------------------------------------------------------------------------------------------------|--------------------------------------------------------------------------------------------------|
| <p>Excited State 90: 6.469-?Sym<br/> 5.8473 eV 212.04 nm<br/> f=0.0082 &lt;S**2&gt;=10.213</p> <p><b>62A -&gt; 80A 0.38232</b><br/> 68A -&gt; 81A -0.33425<br/> 68A -&gt; 82A 0.13438<br/> 70A -&gt; 82A -0.11674<br/> 75A -&gt; 85A -0.31390<br/> 77A -&gt; 84A -0.16024<br/> 78A -&gt; 91A -0.13340<br/> 79A -&gt; 89A 0.12651<br/> 79A -&gt; 92A 0.14813<br/> <b>68B -&gt; 75B 0.39741</b><br/> 70B -&gt; 75B -0.21682<br/> 71B -&gt; 76B 0.12049<br/> 72B -&gt; 78B -0.33849<br/> 72B -&gt; 81B 0.10228<br/> 72B -&gt; 84B -0.10460<br/> 73B -&gt; 82B 0.13377</p> | <p>62A</p> 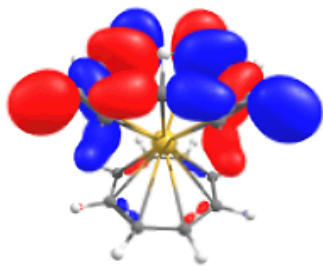   |  <p>80A</p>   |
| <p>Excited State 91: 6.327-?Sym<br/> 5.8572 eV 211.68 nm<br/> f=0.0073 &lt;S**2&gt;=9.757</p> <p><b>62A -&gt; 80A 0.72655</b><br/> 63A -&gt; 80A -0.14402<br/> 75A -&gt; 85A 0.33300<br/> 72B -&gt; 78B 0.16722<br/> 73B -&gt; 81B 0.33301<br/> 73B -&gt; 82B -0.36038<br/> 73B -&gt; 84B 0.12857</p>                                                                                                                                                                                                                                                                  | <p>62A</p>   |  <p>80A</p>  |
| <p>Excited State 93: 6.385-?Sym<br/> 5.8962 eV 210.28 nm<br/> f=0.0296 &lt;S**2&gt;=9.942</p> <p>62A -&gt; 80A -0.44773<br/> 63A -&gt; 80A 0.10854<br/> 68A -&gt; 81A -0.19202<br/> 70A -&gt; 82A -0.13233<br/> 75A -&gt; 85A -0.11214<br/> 77A -&gt; 84A 0.10820<br/> 78A -&gt; 91A -0.18317<br/> 78A -&gt; 93A -0.10755<br/> 68B -&gt; 75B 0.15351<br/> 70B -&gt; 75B -0.11342<br/> 72B -&gt; 77B 0.12350<br/> 72B -&gt; 78B 0.22699<br/> <b>73B -&gt; 81B 0.51666</b><br/> 73B -&gt; 82B -0.38002<br/> 73B -&gt; 84B 0.16440<br/> 74B -&gt; 85B 0.10591</p>         |  <p>73B</p> |  <p>81B</p> |

|                                                                                                                                                                                                                                                                                                                                                                     |                                                                                               |                                                                                                 |
|---------------------------------------------------------------------------------------------------------------------------------------------------------------------------------------------------------------------------------------------------------------------------------------------------------------------------------------------------------------------|-----------------------------------------------------------------------------------------------|-------------------------------------------------------------------------------------------------|
| <p>Excited State 96: 6.349-?Sym<br/> 5.9489 eV 208.42 nm<br/> f=0.0151 &lt;S**2&gt;=9.827</p> <p>78A -&gt; 91A 0.39644<br/> 78A -&gt; 93A 0.19367<br/> 79A -&gt; 88A -0.18866<br/> 72B -&gt; 77B 0.11073<br/> 72B -&gt; 78B 0.15377<br/> 73B -&gt; 81B 0.50080<br/> <b>73B -&gt; 82B 0.57975</b><br/> 73B -&gt; 84B -0.19913<br/> 74B -&gt; 90B -0.17551</p>        | 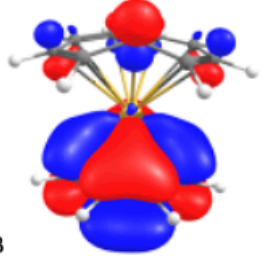 <p>73B</p>  |  <p>82B</p>  |
| <p>Excited State 98: 6.506-?Sym<br/> 6.0447 eV 205.11 nm<br/> f=0.0218 &lt;S**2&gt;=10.332</p> <p>70A -&gt; 81A -0.21352<br/> 70A -&gt; 82A 0.40742<br/> 77A -&gt; 84A 0.11188<br/> 78A -&gt; 87A -0.12325<br/> 79A -&gt; 86A 0.19134<br/> 79A -&gt; 88A -0.24673<br/> <b>79A -&gt; 89A 0.68558</b><br/> 79A -&gt; 92A 0.25361</p>                                  |  <p>79A</p>  |  <p>89A</p>  |
| <p>Excited State 100: 6.471-<br/> ?Sym 6.0882 eV 203.65 nm<br/> f=0.0184 &lt;S**2&gt;=10.218</p> <p>68A -&gt; 81A -0.18610<br/> 70A -&gt; 81A -0.39425<br/> <b>70A -&gt; 82A 0.60026</b><br/> 70A -&gt; 84A -0.11603<br/> 78A -&gt; 87A -0.14533<br/> 79A -&gt; 88A 0.30610<br/> 79A -&gt; 89A -0.41250<br/> 79A -&gt; 94A -0.15408<br/> 73B -&gt; 80B -0.11038</p> |  <p>70A</p> |  <p>82A</p> |

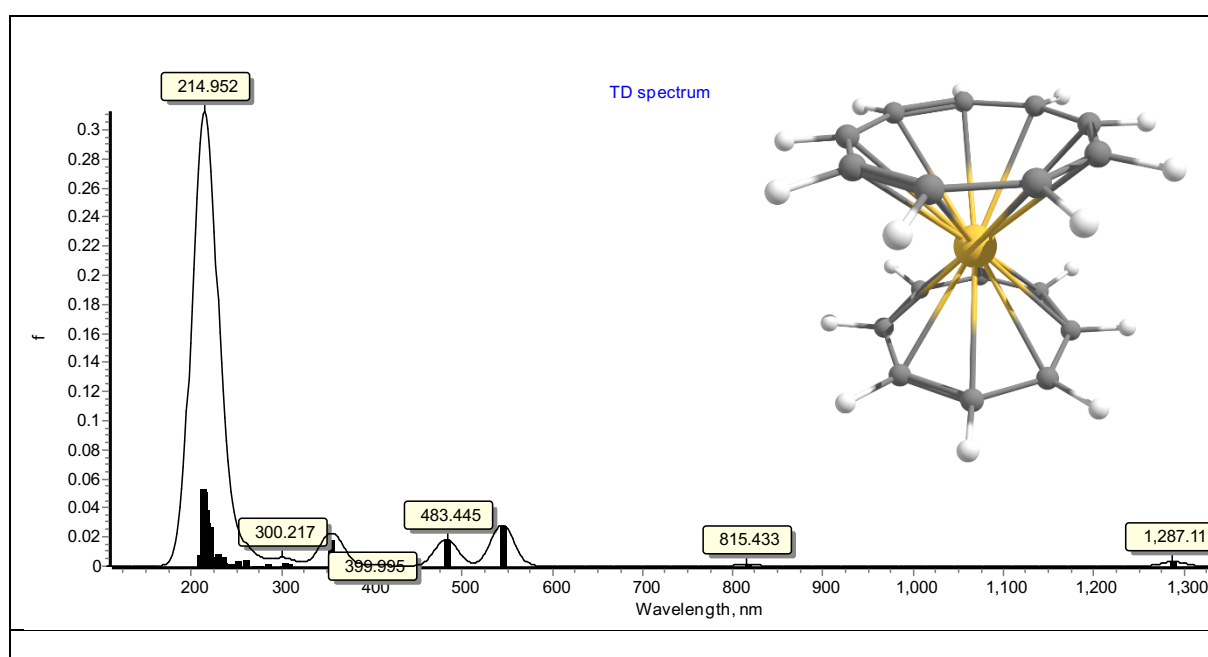

Figure S93: Computed TD spectrum for 2-Sm-cis.

|                                                                                                                                                                                                                                                       |                                                                                     |                                                                                       |     |
|-------------------------------------------------------------------------------------------------------------------------------------------------------------------------------------------------------------------------------------------------------|-------------------------------------------------------------------------------------|---------------------------------------------------------------------------------------|-----|
| 79A,74B: HOMO                                                                                                                                                                                                                                         |                                                                                     |                                                                                       |     |
| Excited State 14: 6.398-?Sym<br>2.2764 eV 544.66 nm<br>f=0.0280 <S**2>=9.984<br>72A -> 81A 0.21663<br>76A -> 81A 0.11243<br>77A -> 80A -0.46410<br>78A -> 80A -0.42772<br><b>79A -&gt; 81A 0.73873</b><br>78A -> 80A 0.18161                          | 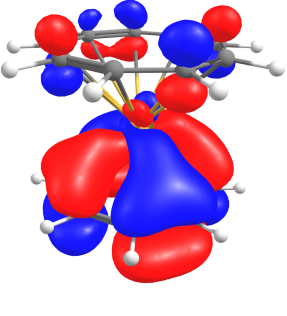   |    | 81A |
| Excited State 16: 6.360-?Sym<br>2.5685 eV 482.72 nm<br>f=0.0182 <S**2>=9.861<br>71A -> 80A -0.18864<br>76A -> 81A 0.16330<br><b>77A -&gt; 80A 0.85501</b><br>78A -> 80A -0.23750<br>79A -> 81A 0.33430                                                |    |    | 80A |
| Excited State 28: 6.431-?Sym<br>3.5026 eV 353.98 nm<br>f=0.0181 <S**2>=10.090<br>72A -> 81A -0.13570<br><b>76A -&gt; 81A 0.96807</b><br>79A -> 81A -0.11552                                                                                           |   |   | 81A |
| Excited State 49: 6.592-?Sym<br>4.7879 eV 258.95 nm<br>f=0.0044 <S**2>=10.613<br>69A -> 81A -0.16307<br>70A -> 80A 0.34176<br>78A -> 87A 0.28728<br><b>79A -&gt; 86A 0.54295</b><br>73B -> 80B 0.47509<br>74B -> 79B 0.45812                          |  |  | 86A |
| Excited State 50: 6.592-?Sym<br>4.7892 eV 258.88 nm<br>f=0.0045 <S**2>=10.613<br>69A -> 80A -0.31312<br>70A -> 81A -0.18044<br>71A -> 80A 0.15642<br>78A -> 86A -0.29043<br><b>79A -&gt; 87A 0.54191</b><br>73B -> 79B -0.47241<br>74B -> 80B 0.45995 |  |  | 87A |

|                                                                                                                                                                                                                                                                                                                                   |                                                                                                |                                                                                                  |
|-----------------------------------------------------------------------------------------------------------------------------------------------------------------------------------------------------------------------------------------------------------------------------------------------------------------------------------|------------------------------------------------------------------------------------------------|--------------------------------------------------------------------------------------------------|
| <p>Excited State 63: 6.320-?Sym<br/> 5.3074 eV 233.61 nm<br/> f=0.0067 &lt;S**2&gt;=9.736</p> <p>62A -&gt; 80A -0.13540<br/> 63A -&gt; 80A 0.19812<br/> <b>66A -&gt; 80A 0.90873</b><br/> 71A -&gt; 84A -0.11427<br/> 76A -&gt; 82A -0.17135<br/> 77A -&gt; 83A -0.16465<br/> 72B -&gt; 75B 0.10075</p>                           | 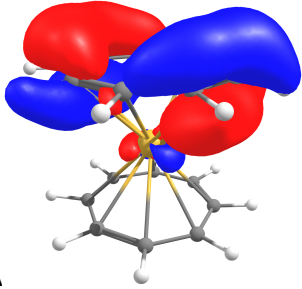 <p>66A</p>   |  <p>80A</p>   |
| <p>Excited State 64: 6.322-?Sym<br/> 5.3179 eV 233.15 nm<br/> f=0.0053 &lt;S**2&gt;=9.741</p> <p>64A -&gt; 80A -0.25526<br/> <b>65A -&gt; 80A 0.89118</b><br/> 72A -&gt; 84A -0.15247<br/> 76A -&gt; 83A 0.15539<br/> 77A -&gt; 82A -0.14959<br/> 78A -&gt; 91A 0.14379</p>                                                       |  <p>65A</p>   |  <p>80A</p>   |
| <p>Excited State 73: 6.174-?Sym<br/> 5.4335 eV 228.18 nm<br/> f=0.0042 &lt;S**2&gt;=9.279</p> <p><b>74A -&gt; 82A 0.86171</b><br/> 75A -&gt; 83A 0.11266<br/> 78A -&gt; 90A 0.11461<br/> 78A -&gt; 92A 0.29121<br/> 74B -&gt; 83B 0.34786<br/> 74B -&gt; 84B -0.11603</p>                                                         |  <p>74A</p>  |  <p>82A</p>  |
| <p>Excited State 78: 6.238-?Sym<br/> 5.5190 eV 224.65 nm<br/> f=0.0045 &lt;S**2&gt;=9.479</p> <p>61A -&gt; 80A 0.27873<br/> 74A -&gt; 82A -0.37799<br/> 75A -&gt; 83A -0.13455<br/> 78A -&gt; 90A 0.29890<br/> 78A -&gt; 92A 0.18750<br/> 79A -&gt; 91A 0.27013<br/> <b>74B -&gt; 83B 0.68361</b><br/> 74B -&gt; 86B -0.14385</p> |  <p>74B</p> |  <p>83B</p> |
| <p>Excited State 83: 6.371-?Sym<br/> 5.5945 eV 221.62 nm<br/> f=0.0060 &lt;S**2&gt;=9.896</p> <p><b>61A -&gt; 80A 0.70874</b><br/> 74A -&gt; 82A 0.10114<br/> 78A -&gt; 90A 0.39765<br/> 78A -&gt; 92A -0.20075<br/> 78A -&gt; 94A -0.16530<br/> 79A -&gt; 91A -0.41177<br/> 74B -&gt; 83B -0.19892</p>                           |  <p>61A</p> |  <p>80A</p> |



|                                                                                                                                                                                                                                                                                                                                                                                                                      |                                                                                                |                                                                                                  |
|----------------------------------------------------------------------------------------------------------------------------------------------------------------------------------------------------------------------------------------------------------------------------------------------------------------------------------------------------------------------------------------------------------------------|------------------------------------------------------------------------------------------------|--------------------------------------------------------------------------------------------------|
| <p>Excited State 85: 6.507-?Sym<br/> 5.6300 eV 220.22 nm<br/> f=0.0267 &lt;S**2&gt;=10.334</p> <p>61A -&gt; 80A 0.36482<br/> 74A -&gt; 82A 0.13124<br/> 78A -&gt; 92A -0.18152<br/> <b>79A -&gt; 91A 0.75075</b><br/> 73B -&gt; 81B -0.10824<br/> 73B -&gt; 89B -0.25997<br/> 74B -&gt; 83B -0.24494<br/> 74B -&gt; 90B 0.25462</p>                                                                                  | 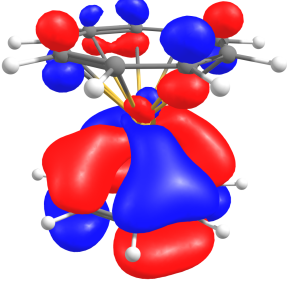 <p>79A</p>   |  <p>91A</p>   |
| <p>Excited State 89: 6.359-?Sym<br/> 5.7397 eV 216.01 nm<br/> f=0.0302 &lt;S**2&gt;=9.860</p> <p>66A -&gt; 80A 0.11094<br/> 73A -&gt; 83A -0.13819<br/> 76A -&gt; 82A 0.19943<br/> 77A -&gt; 83A 0.19366<br/> <b>79A -&gt; 89A 0.81627</b><br/> 79A -&gt; 93A -0.22217<br/> 71B -&gt; 76B 0.18806<br/> 72B -&gt; 75B -0.18338<br/> 74B -&gt; 84B -0.12284</p>                                                        |  <p>79A</p>   |  <p>89A</p>   |
| <p>Excited State 90: 6.346-?Sym<br/> 5.7505 eV 215.61 nm<br/> f=0.0388 &lt;S**2&gt;=9.817</p> <p>65A -&gt; 80A -0.13202<br/> 73A -&gt; 82A 0.11290<br/> 76A -&gt; 83A 0.22404<br/> 77A -&gt; 82A -0.22019<br/> 79A -&gt; 88A 0.17400<br/> <b>79A -&gt; 90A 0.68238</b><br/> 79A -&gt; 92A -0.36894<br/> 79A -&gt; 94A -0.21440<br/> 71B -&gt; 75B 0.20839<br/> 72B -&gt; 76B 0.21423<br/> 74B -&gt; 79B -0.10421</p> |  <p>79A</p> |  <p>90A</p> |
| <p>Excited State 91: 6.095-?Sym<br/> 5.7829 eV 214.40 nm<br/> f=0.0048 &lt;S**2&gt;=9.038</p> <p>73A -&gt; 83A 0.18201<br/> <b>74B -&gt; 84B 0.82656</b><br/> 74B -&gt; 86B -0.44009</p>                                                                                                                                                                                                                             |  <p>74B</p> |  <p>84B</p> |

|                                                                                                                                                                                                                                                                                                                                                                                                                                                                                                                                                                                                                         |                                                                                                |                                                                                                  |
|-------------------------------------------------------------------------------------------------------------------------------------------------------------------------------------------------------------------------------------------------------------------------------------------------------------------------------------------------------------------------------------------------------------------------------------------------------------------------------------------------------------------------------------------------------------------------------------------------------------------------|------------------------------------------------------------------------------------------------|--------------------------------------------------------------------------------------------------|
| <p>Excited State 92: 6.179-?Sym<br/> 5.8133 eV 213.28 nm<br/> f=0.0429 &lt;S**2&gt;=9.294</p> <p>66A -&gt; 80A -0.13130<br/> 72A -&gt; 82A -0.10484<br/> <b>73A -&gt; 83A 0.71267</b><br/> 76A -&gt; 82A -0.22161<br/> 77A -&gt; 83A -0.21942<br/> 78A -&gt; 86A -0.15237<br/> 79A -&gt; 87A 0.14084<br/> 79A -&gt; 89A 0.37392<br/> 79A -&gt; 93A -0.11016<br/> 71B -&gt; 76B -0.21540<br/> 72B -&gt; 75B 0.20979<br/> 73B -&gt; 79B 0.12637</p>                                                                                                                                                                       | <p>73A</p> 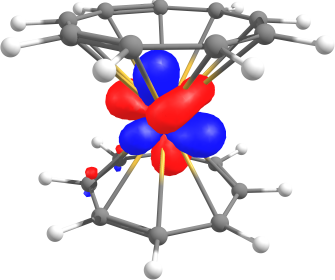   |  <p>83A</p>   |
| <p>Excited State 93: 6.163-?Sym<br/> 5.8138 eV 213.26 nm<br/> f=0.0190 &lt;S**2&gt;=9.246</p> <p>65A -&gt; 80A -0.11137<br/> <b>73A -&gt; 82A 0.84460</b><br/> 76A -&gt; 83A 0.14260<br/> 77A -&gt; 82A -0.14974<br/> 78A -&gt; 87A 0.10522<br/> 79A -&gt; 88A -0.16944<br/> 79A -&gt; 90A -0.27908<br/> 79A -&gt; 92A 0.11107<br/> 71B -&gt; 75B 0.13199<br/> 72B -&gt; 76B 0.14904</p>                                                                                                                                                                                                                                | <p>73A</p>   |  <p>82A</p>  |
| <p>Excited State 95: 6.167-?Sym<br/> 5.8411 eV 212.26 nm<br/> f=0.0507 &lt;S**2&gt;=9.260</p> <p>65A -&gt; 80A 0.14727<br/> 72A -&gt; 83A -0.13244<br/> <b>73A -&gt; 82A 0.48132</b><br/> 76A -&gt; 83A -0.25489<br/> 77A -&gt; 82A 0.23552<br/> 78A -&gt; 87A -0.19477<br/> 79A -&gt; 86A -0.17782<br/> 79A -&gt; 90A 0.33079<br/> 79A -&gt; 92A -0.11104<br/> 79A -&gt; 94A -0.10986<br/> 71B -&gt; 75B -0.24750<br/> 72B -&gt; 76B -0.23909<br/> 73B -&gt; 80B 0.16267<br/> 73B -&gt; 84B -0.28883<br/> 73B -&gt; 86B 0.21124<br/> 74B -&gt; 79B 0.11386<br/> 74B -&gt; 85B -0.15865<br/> 74B -&gt; 87B -0.18554</p> | <p>73A</p>  |  <p>82A</p> |

|                                                                                                                                                                                                                                                                                                                                                                                                                                                                            |                                                                                                |                                                                                                  |
|----------------------------------------------------------------------------------------------------------------------------------------------------------------------------------------------------------------------------------------------------------------------------------------------------------------------------------------------------------------------------------------------------------------------------------------------------------------------------|------------------------------------------------------------------------------------------------|--------------------------------------------------------------------------------------------------|
| <p>Excited State 96: 6.160-?Sym<br/> 5.8578 eV 211.66 nm<br/> f=0.0532 &lt;S**2&gt;=9.238</p> <p>66A -&gt; 80A 0.16964<br/> 72A -&gt; 82A 0.14740<br/> <b>73A -&gt; 83A 0.64601</b><br/> 76A -&gt; 82A 0.25553<br/> 77A -&gt; 83A 0.24187<br/> 78A -&gt; 86A 0.18665<br/> 79A -&gt; 87A -0.18354<br/> 79A -&gt; 89A -0.24945<br/> 71B -&gt; 76B 0.25215<br/> 72B -&gt; 75B -0.24521<br/> 73B -&gt; 79B -0.15719<br/> 74B -&gt; 80B 0.12044<br/> 74B -&gt; 84B -0.17131</p> | <p>73A</p> 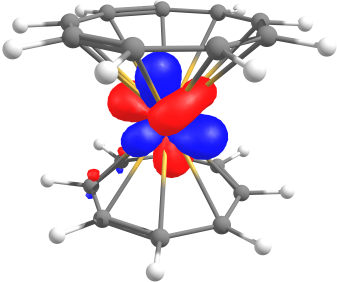   |  <p>83A</p>   |
| <p>Excited State 97: 6.091-?Sym<br/> 5.8608 eV 211.55 nm<br/> f=0.0041 &lt;S**2&gt;=9.026</p> <p><b>74B -&gt; 85B 0.76434</b><br/> 74B -&gt; 87B 0.56771<br/> 74B -&gt; 89B 0.14049</p>                                                                                                                                                                                                                                                                                    |  <p>74B</p>  |  <p>85B</p>   |
| <p>Excited State 98: 6.175-?Sym<br/> 5.8774 eV 210.95 nm<br/> f=0.0184 &lt;S**2&gt;=9.283</p> <p>73A -&gt; 82A 0.10812<br/> 76A -&gt; 83A -0.13190<br/> 77A -&gt; 82A 0.13347<br/> 79A -&gt; 90A 0.12873<br/> 71B -&gt; 75B -0.12913<br/> 72B -&gt; 76B -0.13009<br/> 73B -&gt; 83B 0.13559<br/> <b>73B -&gt; 84B 0.80505</b><br/> 73B -&gt; 86B -0.39485</p>                                                                                                              |  <p>73B</p> |  <p>84B</p> |

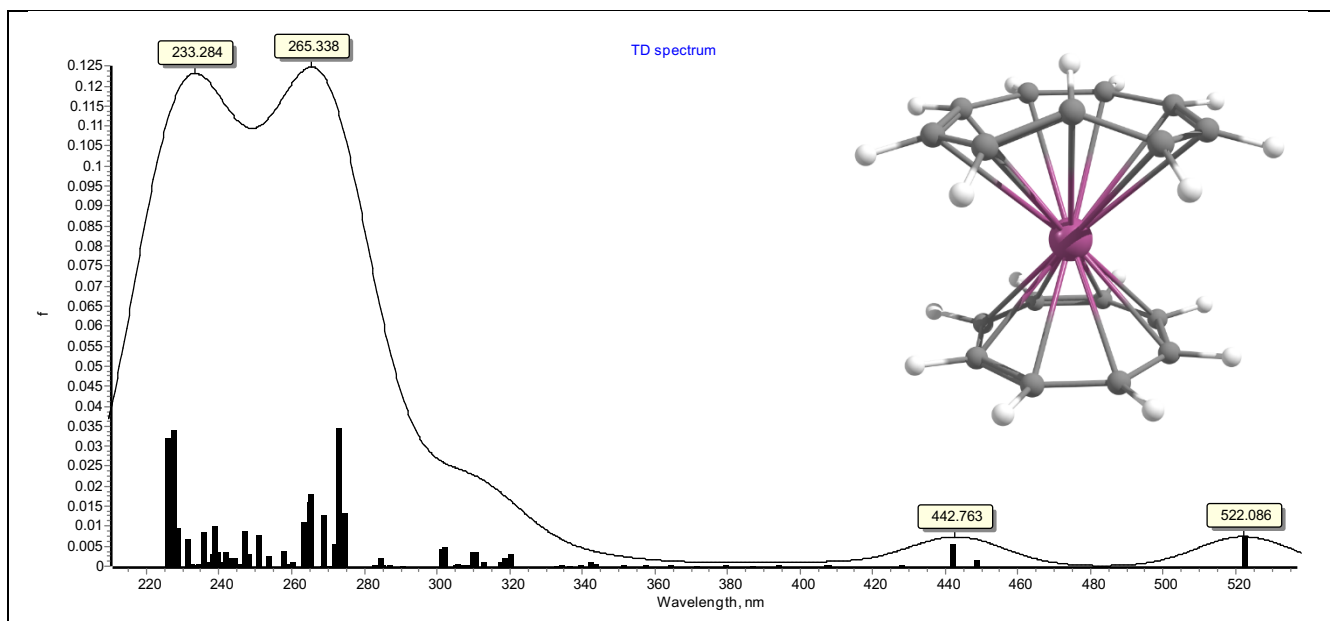

Figure S94: Computed TD spectrum for 2-Ce-trans.

|                                                                                                                                                                                                                                                                                                                                |                                                                                                    |                                                                                                      |
|--------------------------------------------------------------------------------------------------------------------------------------------------------------------------------------------------------------------------------------------------------------------------------------------------------------------------------|----------------------------------------------------------------------------------------------------|------------------------------------------------------------------------------------------------------|
| 75A and 74B: HOMO                                                                                                                                                                                                                                                                                                              |                                                                                                    |                                                                                                      |
| Excited State 7: 2.015-?Sym<br>2.3746 eV <b>522.12</b> nm<br>f=0.0074 <S**2>=0.765<br><b>73A -&gt; 76A 0.85893</b><br>73A -> 80A -0.11851<br>73A -> 81A 0.45661                                                                                                                                                                | 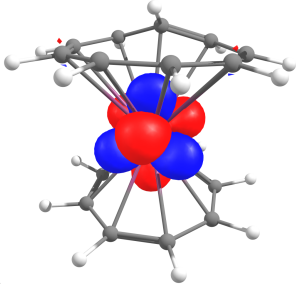 <p>73A</p>       |  <p>76A</p>       |
| Excited State 11: 2.144-?Sym<br>2.8053 eV <b>441.97</b> nm<br>f=0.0056 <S**2>=0.899<br>72A -> 76A 0.11227<br><b>74A -&gt; 76A 0.67846</b><br>74A -> 81A 0.12618<br><b>73B -&gt; 75B 0.66309</b><br>74B -> 76B -0.15041                                                                                                         |  <p>74A (73B)</p> |  <p>76A (75B)</p> |
| Excited State 43: 2.954-?Sym<br>4.0024 eV <b>309.77</b> nm<br>f=0.0035 <S**2>=1.932<br>71A -> 77A -0.40987<br>75A -> 77A -0.29122<br><b>75A -&gt; 82A 0.53320</b><br>75A -> 83A -0.45897<br>71B -> 76B 0.22155<br>72B -> 75B 0.19255<br>73B -> 82B 0.26234<br>74B -> 83B 0.20979                                               |  <p>75A</p>      |  <p>82A</p>      |
| Excited State 49: 2.658-?Sym<br>4.1106 eV <b>301.62</b> nm<br>f=0.0049 <S**2>=1.516<br>71A -> 77A -0.11900<br>74A -> 81A -0.10164<br>75A -> 82A -0.12304<br>71B -> 76B 0.24754<br>73B -> 82B 0.13278<br>73B -> 84B -0.11077<br>74B -> 76B 0.24246<br>74B -> 79B -0.42606<br><b>74B -&gt; 81B 0.72942</b><br>74B -> 83B 0.15442 |  <p>74B</p>     |  <p>81B</p>     |

|                                                                                                                                                                                                                                                                                                                                                                                                                              |                                                                                                |                                                                                                  |
|------------------------------------------------------------------------------------------------------------------------------------------------------------------------------------------------------------------------------------------------------------------------------------------------------------------------------------------------------------------------------------------------------------------------------|------------------------------------------------------------------------------------------------|--------------------------------------------------------------------------------------------------|
| <p>Excited State 50: 2.624-?Sym<br/> 4.1169 eV <b>301.16</b> nm<br/> f=0.0043 &lt;S**2&gt;=1.472</p> <p>74A -&gt; 82A -0.14367<br/> 72B -&gt; 76B 0.25692<br/> 73B -&gt; 76B 0.23005<br/> 73B -&gt; 79B -0.41885<br/> <b>73B -&gt; 81B</b> 0.67980<br/> 73B -&gt; 83B 0.38944</p>                                                                                                                                            | 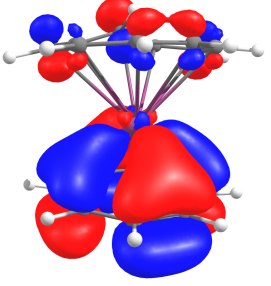 <p>73B</p>   |  <p>81B</p>   |
| <p>Excited State 59: 2.561-?Sym<br/> 4.5213 eV <b>274.22</b> nm<br/> f=0.0135 &lt;S**2&gt;=1.389</p> <p>71A -&gt; 77A 0.42315<br/> 71A -&gt; 79A 0.23642<br/> 71A -&gt; 83A -0.14003<br/> <b>72A -&gt; 80A</b> 0.54680<br/> 71B -&gt; 76B 0.36051<br/> 72B -&gt; 75B 0.11473<br/> 72B -&gt; 77B 0.40639<br/> 73B -&gt; 80B -0.10888<br/> 73B -&gt; 85B -0.23370</p>                                                          |  <p>72A</p>   |  <p>80A</p>   |
| <p>Excited State 60: 2.425-?Sym<br/> 4.5477 eV <b>272.63</b> nm<br/> f=0.0346 &lt;S**2&gt;=1.220</p> <p>71A -&gt; 76A -0.18540<br/> 71A -&gt; 78A -0.16972<br/> 71A -&gt; 80A -0.33073<br/> <b>72A -&gt; 77A</b> 0.42156<br/> 72A -&gt; 82A 0.23841<br/> 72A -&gt; 83A -0.15227<br/> 71B -&gt; 75B -0.21729<br/> 71B -&gt; 77B -0.37649<br/> 72B -&gt; 76B 0.39699<br/> 74B -&gt; 80B 0.14323<br/> 74B -&gt; 85B 0.34449</p> |  <p>72A</p>  |  <p>77A</p>  |
| <p>Excited State 61: 2.768-?Sym<br/> 4.5654 eV <b>271.57</b> nm<br/> f=0.0055 &lt;S**2&gt;=1.665</p> <p>71A -&gt; 77A -0.22476<br/> 71A -&gt; 79A 0.27958<br/> 71A -&gt; 82A -0.12322<br/> <b>72A -&gt; 80A</b> 0.63813<br/> 73A -&gt; 84A -0.23945<br/> 73A -&gt; 85A -0.23815<br/> 71B -&gt; 76B -0.18554<br/> 72B -&gt; 75B -0.10761<br/> 72B -&gt; 77B -0.39637<br/> 73B -&gt; 85B 0.22892</p>                           |  <p>72A</p> |  <p>80A</p> |

|                                                                                                                                                                                                                                                                                                                                                                                                                                                                                                                                                                                                                              |                                                                                                |                                                                                                  |
|------------------------------------------------------------------------------------------------------------------------------------------------------------------------------------------------------------------------------------------------------------------------------------------------------------------------------------------------------------------------------------------------------------------------------------------------------------------------------------------------------------------------------------------------------------------------------------------------------------------------------|------------------------------------------------------------------------------------------------|--------------------------------------------------------------------------------------------------|
| <p>Excited State 63: 2.834-?Sym<br/> 4.6175 eV <b>268.51</b> nm<br/> f=0.0127 &lt;S**2&gt;=1.758</p> <p>71A -&gt; 77A -0.21368<br/> <b>71A -&gt; 79A</b> 0.56896<br/> 71A -&gt; 83A 0.10882<br/> 72A -&gt; 76A -0.12307<br/> 72A -&gt; 78A -0.21156<br/> 72A -&gt; 81A -0.49393<br/> 74A -&gt; 87A 0.11144<br/> 71B -&gt; 76B -0.30253<br/> 72B -&gt; 77B 0.22558<br/> 73B -&gt; 85B -0.23440</p>                                                                                                                                                                                                                            | 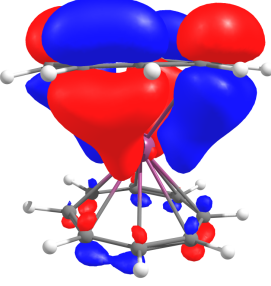 <p>71A</p>   |  <p>79A</p>   |
| <p>Excited State 65: 2.843-?Sym<br/> 4.6787 eV <b>265.00</b> nm<br/> f=0.0179 &lt;S**2&gt;=1.771</p> <p>71A -&gt; 77A 0.17300<br/> 71A -&gt; 79A 0.42721<br/> 71A -&gt; 82A 0.17033<br/> 72A -&gt; 80A -0.26624<br/> 73A -&gt; 84A -0.16121<br/> 73A -&gt; 85A -0.12416<br/> 73A -&gt; 86A 0.22598<br/> 73A -&gt; 87A -0.19960<br/> 74A -&gt; 86A -0.17140<br/> 74A -&gt; 87A -0.18039<br/> 75A -&gt; 88A -0.10628<br/> 71B -&gt; 76B 0.12455<br/> 71B -&gt; 83B -0.11432<br/> 72B -&gt; 82B 0.10991<br/> <b>73B -&gt; 85B</b> 0.49742<br/> 73B -&gt; 86B 0.10086<br/> 74B -&gt; 83B -0.12036<br/> 74B -&gt; 87B 0.15151</p> |  <p>73B</p>   |  <p>85B</p>   |
| <p>Excited State 66: 2.789-?Sym<br/> 4.6815 eV <b>264.84</b> nm<br/> f=0.0160 &lt;S**2&gt;=1.694</p> <p>71A -&gt; 76A 0.10116<br/> 71A -&gt; 78A 0.14864<br/> 71A -&gt; 80A -0.40270<br/> 71A -&gt; 81A 0.16417<br/> 72A -&gt; 77A -0.17910<br/> 72A -&gt; 82A -0.28513<br/> 73A -&gt; 89A 0.31989<br/> 75A -&gt; 86A -0.18892<br/> 75A -&gt; 87A -0.21133<br/> 71B -&gt; 77B 0.12272<br/> 72B -&gt; 76B -0.12434<br/> 73B -&gt; 87B -0.13524<br/> 74B -&gt; 78B 0.10169<br/> <b>74B -&gt; 85B</b> 0.56194</p>                                                                                                               |  <p>74B</p> |  <p>85B</p> |



|                                                                                                                                                                                                                                                                                                                                                                                                                                                                                                                             |                                                                                                |                                                                                                  |
|-----------------------------------------------------------------------------------------------------------------------------------------------------------------------------------------------------------------------------------------------------------------------------------------------------------------------------------------------------------------------------------------------------------------------------------------------------------------------------------------------------------------------------|------------------------------------------------------------------------------------------------|--------------------------------------------------------------------------------------------------|
| <p>74B -&gt; 86B 0.13926</p> <p>Excited State 67: 3.099-?Sym<br/>4.7157 eV <b>262.92</b> nm<br/>f=0.0110 &lt;S**2&gt;=2.150</p> <p>71A -&gt; 79A 0.39050<br/>72A -&gt; 80A -0.19410<br/><b>72A -&gt; 81A</b> 0.47865<br/>74A -&gt; 86A 0.10037<br/>74A -&gt; 87A 0.16787<br/>75A -&gt; 88A 0.11893<br/>71B -&gt; 76B 0.13974<br/>71B -&gt; 83B -0.10546<br/>72B -&gt; 77B -0.36396<br/>72B -&gt; 82B 0.15742<br/>73B -&gt; 82B 0.10326<br/>73B -&gt; 85B -0.42261<br/>73B -&gt; 86B -0.10729<br/>74B -&gt; 87B -0.11350</p> | 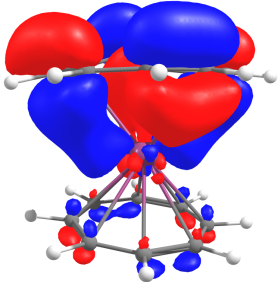 <p>72A</p>   |  <p>81A</p>   |
| <p>Excited State 74: 2.946-?Sym<br/>4.9452 eV <b>250.71</b> nm<br/>f=0.0078 &lt;S**2&gt;=1.919</p> <p>71A -&gt; 77A 0.12711<br/>71A -&gt; 83A -0.20567<br/>72A -&gt; 81A -0.35504<br/>72A -&gt; 84A 0.24139<br/>72A -&gt; 85A -0.20245<br/>73A -&gt; 86A -0.24463<br/>73A -&gt; 87A 0.13450<br/><b>75A -&gt; 88A</b> 0.43686<br/>72B -&gt; 77B -0.26775<br/>72B -&gt; 78B 0.22056<br/>72B -&gt; 80B -0.14672<br/>73B -&gt; 85B 0.23498<br/>74B -&gt; 87B -0.38785</p>                                                       |  <p>75A</p>  |  <p>88A</p>  |
| <p>Excited State 77: 2.913-?Sym<br/>5.0285 eV <b>246.56</b> nm<br/>f=0.0088 &lt;S**2&gt;=1.871</p> <p>71A -&gt; 81A 0.39119<br/>71A -&gt; 84A -0.18908<br/>71A -&gt; 85A 0.15562<br/>73A -&gt; 89A 0.11432<br/>73A -&gt; 91A -0.19933<br/>74A -&gt; 88A 0.21505<br/>75A -&gt; 86A 0.14555<br/>75A -&gt; 87A 0.19361<br/>71B -&gt; 77B 0.31975<br/>71B -&gt; 78B -0.30119<br/>71B -&gt; 80B 0.18254<br/>72B -&gt; 76B 0.12686<br/><b>72B -&gt; 79B</b> 0.48572<br/>72B -&gt; 81B -0.11330</p>                                |  <p>72B</p> |  <p>79B</p> |



|                                                                                                                                                                                                                                                                                                                                                                          |                                                                                            |                                                                                              |
|--------------------------------------------------------------------------------------------------------------------------------------------------------------------------------------------------------------------------------------------------------------------------------------------------------------------------------------------------------------------------|--------------------------------------------------------------------------------------------|----------------------------------------------------------------------------------------------|
| 73B -> 87B -0.20114<br>74B -> 86B -0.12657<br>74B -> 88B -0.14334                                                                                                                                                                                                                                                                                                        |                                                                                            |                                                                                              |
| Excited State 88: 2.841-?Sym<br>5.2006 eV <b>238.40</b> nm<br>f=0.0102 <S**2>=1.768<br>71A -> 82A 0.14948<br>71A -> 83A -0.18155<br>72A -> 85A -0.11378<br>73A -> 90A 0.29129<br>73A -> 92A 0.18877<br>71B -> 76B -0.13254<br>71B -> 79B 0.18970<br>71B -> 81B 0.49600<br>71B -> 83B 0.12227<br>72B -> 77B 0.11810<br><b>72B -&gt; 82B</b> 0.59280<br>72B -> 84B 0.17147 | 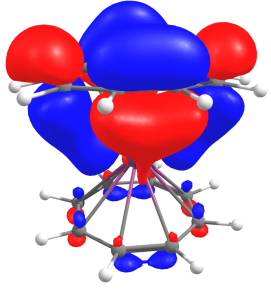<br>72B   | <br>82B   |
| Excited State 96: 2.704-?Sym<br>5.3611 eV <b>231.27</b> nm<br>f=0.0070 <S**2>=1.578<br>72A -> 82A -0.10185<br>71B -> 78B -0.10818<br>71B -> 80B -0.36256<br>71B -> 82B 0.38810<br><b>71B -&gt; 84B</b> 0.78815<br>72B -> 79B -0.10451<br>72B -> 81B 0.10245                                                                                                              | <br>71B  | <br>84B  |
| Excited State 97: 3.182-?Sym<br>5.4300 eV <b>228.33</b> nm<br>f=0.0094 <S**2>=2.281<br>72A -> 84A -0.24022<br>72A -> 85A -0.31392<br>71B -> 81B -0.14804<br>71B -> 83B -0.34128<br>72B -> 78B 0.39596<br><b>72B -&gt; 80B</b> 0.64956<br>72B -> 84B 0.26654                                                                                                              | <br>72B | <br>80B |
| Excited State 99: 2.570-?Sym<br>5.4607 eV <b>227.05</b> nm<br>f=0.0341 <S**2>=1.401<br>71A -> 82A 0.10059<br><b>72A -&gt; 84A</b> 0.53125<br><b>72A -&gt; 85A</b> 0.51786<br>71B -> 83B -0.52455<br>72B -> 80B 0.11405<br>72B -> 82B 0.21782<br>72B -> 84B -0.11946                                                                                                      | <br>72A | <br>84A |

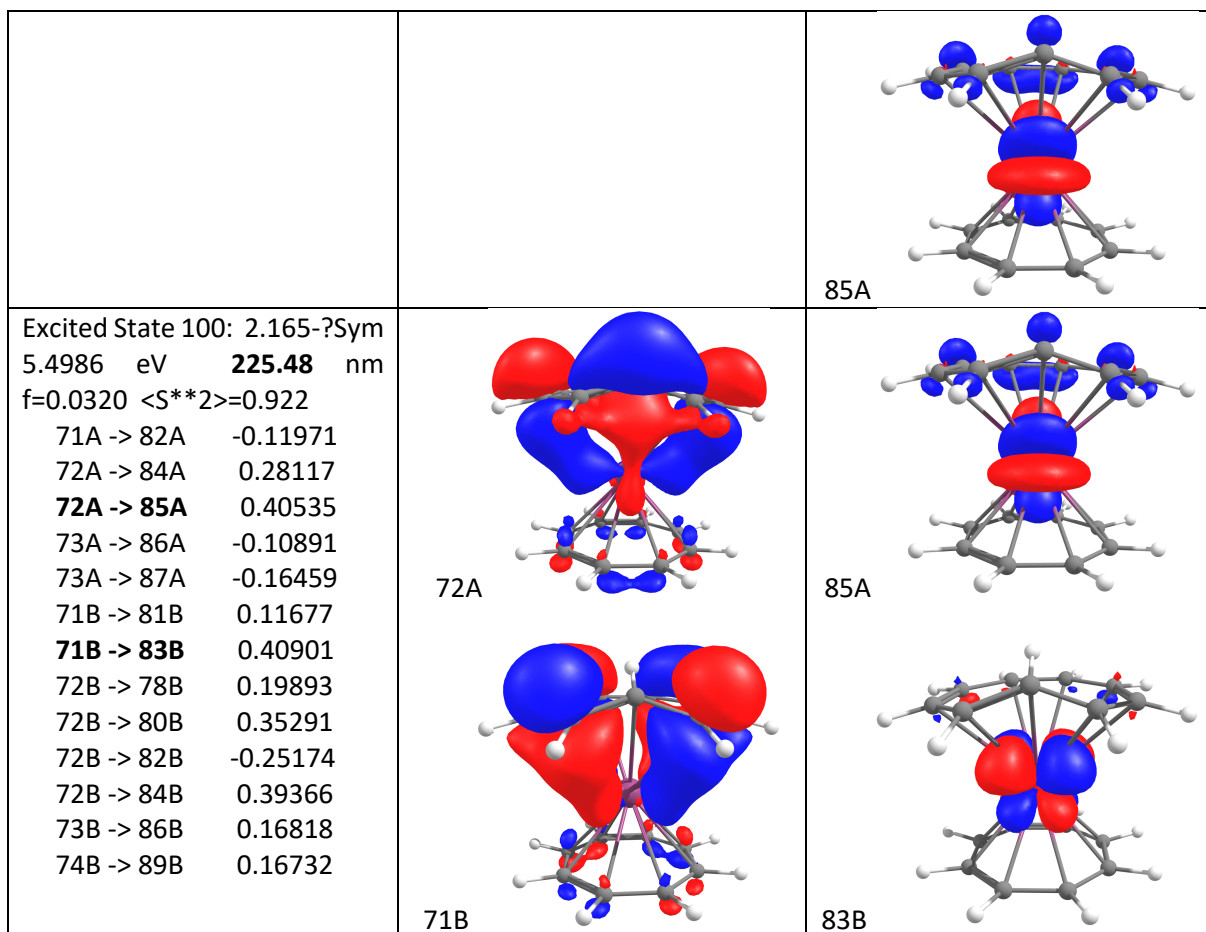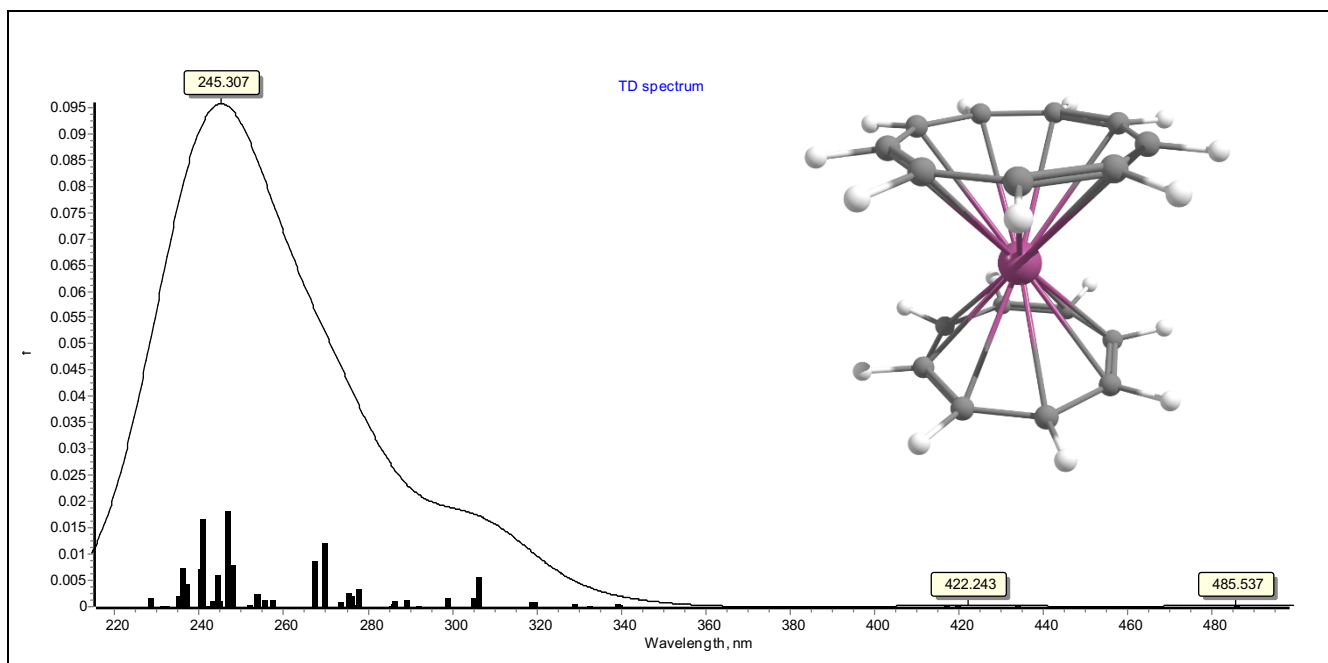

Figure S95: Computed TD spectrum for 2-Ce-trans

| 75A and 74B: HOMO                                                                                                                                                                                                                                                                                                                                                                        |                                                                                     |
|------------------------------------------------------------------------------------------------------------------------------------------------------------------------------------------------------------------------------------------------------------------------------------------------------------------------------------------------------------------------------------------|-------------------------------------------------------------------------------------|
| <p>Excited State 43: 2.633-?Sym<br/> 4.0495 eV 306.17 nm<br/> f=0.0049 &lt;S**2&gt;=1.483</p> <p>72A -&gt; 77A -0.29714<br/> 74A -&gt; 77A -0.24321<br/> 74A -&gt; 79A 0.17003<br/> <b>74A -&gt; 83A 0.62727</b><br/> 71B -&gt; 75B 0.20132<br/> 72B -&gt; 76B 0.18002<br/> 73B -&gt; 82B 0.27399<br/> 74B -&gt; 76B 0.16439<br/> 74B -&gt; 81B -0.45996<br/> 74B -&gt; 85B -0.12250</p> | 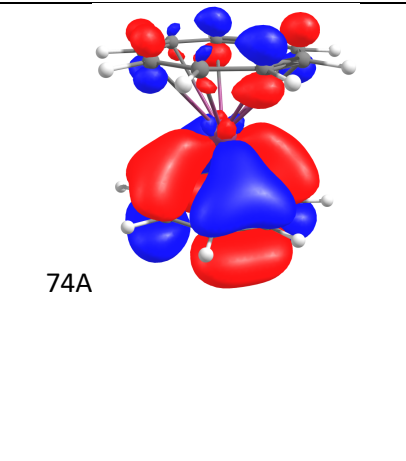   |
| <p>Excited State 44: 2.315-?Sym<br/> 4.0508 eV 306.08 nm<br/> f=0.0054 &lt;S**2&gt;=1.089</p> <p>71A -&gt; 77A -0.23997<br/> 72A -&gt; 76A -0.30091<br/> 74A -&gt; 81A 0.21539<br/> 75A -&gt; 77A -0.20968<br/> 75A -&gt; 79A 0.15162<br/> <b>75A -&gt; 83A 0.62482</b><br/> 72B -&gt; 75B 0.17370<br/> 73B -&gt; 81B 0.17562<br/> 74B -&gt; 75B -0.10517<br/> 74B -&gt; 82B 0.49663</p> |   |
| <p>Excited State 58: 2.771-?Sym<br/> 4.4635 eV 277.77 nm<br/> f=0.0032 &lt;S**2&gt;=1.670</p> <p>71A -&gt; 76A -0.27219<br/> 71A -&gt; 81A -0.22225<br/> 72A -&gt; 77A 0.21385<br/> <b>72A -&gt; 79A 0.83361</b><br/> 72B -&gt; 76B -0.19728<br/> 74B -&gt; 85B 0.24478</p>                                                                                                              |  |
| <p>Excited State 67: 2.678-?Sym<br/> 4.6418 eV 267.11 nm<br/> f=0.0084 &lt;S**2&gt;=1.543</p> <p>71A -&gt; 77A 0.28870<br/> 71A -&gt; 79A -0.30547<br/> 71A -&gt; 83A 0.13573<br/> 72A -&gt; 76A 0.18387<br/> <b>72A -&gt; 81A 0.74747</b><br/> 72B -&gt; 75B 0.40823</p>                                                                                                                |  |

|                                                                                                                                                                                                                                                                                                                                                                                                                                                  |                                                                                                |                                                                                                  |
|--------------------------------------------------------------------------------------------------------------------------------------------------------------------------------------------------------------------------------------------------------------------------------------------------------------------------------------------------------------------------------------------------------------------------------------------------|------------------------------------------------------------------------------------------------|--------------------------------------------------------------------------------------------------|
| <p>Excited State 68: 2.634-?Sym<br/> 4.6427 eV 267.05 nm<br/> f=0.0084 &lt;S**2&gt;=1.485</p> <p>71A -&gt; 76A 0.16550<br/> <b>71A -&gt; 81A 0.70196</b><br/> 72A -&gt; 77A -0.26998<br/> 72A -&gt; 79A 0.37840<br/> 72A -&gt; 83A -0.13882<br/> 73A -&gt; 87A -0.16094<br/> 71B -&gt; 75B -0.41436</p>                                                                                                                                          | 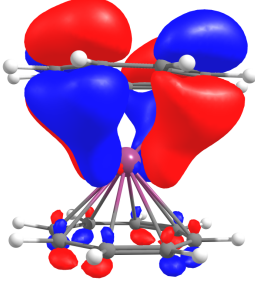 <p>71A</p>   |  <p>81A</p>   |
| <p>Excited State 75: 2.815-?Sym<br/> 5.0087 eV 247.54 nm<br/> f=0.0078 &lt;S**2&gt;=1.731</p> <p>71A -&gt; 77A 0.15962<br/> <b>71A -&gt; 83A 0.58867</b><br/> 72A -&gt; 81A -0.15237<br/> 72A -&gt; 84A -0.33932<br/> 73A -&gt; 89A -0.42714<br/> 73A -&gt; 91A 0.12270<br/> 75A -&gt; 88A 0.26879<br/> 71B -&gt; 76B 0.20231<br/> 71B -&gt; 81B 0.18133<br/> 72B -&gt; 79B -0.10894<br/> 74B -&gt; 86B -0.21416</p>                             |  <p>71A</p>   |  <p>83A</p>   |
| <p>Excited State 76: 3.021-?Sym<br/> 5.0103 eV 247.46 nm<br/> f=0.0073 &lt;S**2&gt;=2.032</p> <p>71A -&gt; 81A 0.15811<br/> 71A -&gt; 84A -0.11976<br/> 72A -&gt; 77A 0.15043<br/> <b>72A -&gt; 83A 0.63991</b><br/> 73A -&gt; 87A -0.35691<br/> 74A -&gt; 88A 0.37029<br/> 71B -&gt; 79B 0.12752<br/> 71B -&gt; 82B -0.11076<br/> 72B -&gt; 76B -0.18962<br/> 72B -&gt; 81B -0.17980<br/> 73B -&gt; 86B -0.30482<br/> 74B -&gt; 85B 0.12747</p> |  <p>72A</p> |  <p>83A</p> |
| <p>Excited State 78: 2.970-?Sym<br/> 5.0293 eV 246.52 nm<br/> f=0.0180 &lt;S**2&gt;=1.955</p> <p><b>71A -&gt; 84A 0.76960</b><br/> 72A -&gt; 83A 0.11670<br/> 73A -&gt; 90A 0.41443<br/> 73A -&gt; 93A -0.10933<br/> 75A -&gt; 84A -0.11653<br/> 75A -&gt; 87A 0.15224<br/> 71B -&gt; 78B -0.11192<br/> 71B -&gt; 80B 0.14637<br/> 71B -&gt; 83B 0.18341</p>                                                                                     |  <p>71A</p> |  <p>84A</p> |

|                                                                                                                                                                                                                                                                                                                                                                                                                                                                                         |                                                                                                |                                                                                                  |
|-----------------------------------------------------------------------------------------------------------------------------------------------------------------------------------------------------------------------------------------------------------------------------------------------------------------------------------------------------------------------------------------------------------------------------------------------------------------------------------------|------------------------------------------------------------------------------------------------|--------------------------------------------------------------------------------------------------|
| <p>72B -&gt; 84B -0.23758</p> <p>Excited State 81: 2.339-?Sym<br/>5.0762 eV 244.25 nm<br/>f=0.0059 &lt;S**2&gt;=1.118</p> <p>71A -&gt; 84A -0.40126<br/><b>73A -&gt; 90A 0.81339</b><br/>73A -&gt; 93A -0.20560<br/>73A -&gt; 95A -0.14595<br/>74A -&gt; 89A 0.10117<br/>71B -&gt; 83B -0.16005<br/>72B -&gt; 84B 0.11375<br/>73B -&gt; 88B -0.12299</p>                                                                                                                                | 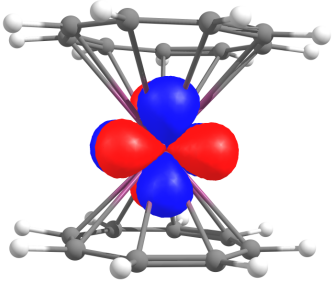 <p>73A</p>   |  <p>90A</p>   |
| <p>Excited State 87: 2.808-?Sym<br/>5.1539 eV 240.56 nm<br/>f=0.0042 &lt;S**2&gt;=1.721</p> <p>73A -&gt; 90A 0.11700<br/>71B -&gt; 77B -0.13279<br/><b>71B -&gt; 78B 0.74986</b><br/>71B -&gt; 80B -0.59254<br/>72B -&gt; 84B -0.13940</p>                                                                                                                                                                                                                                              |  <p>71B</p>   |  <p>78B</p>   |
| <p>Excited State 88: 3.027-?Sym<br/>5.1571 eV 240.42 nm<br/>f=0.0165 &lt;S**2&gt;=2.040</p> <p>71A -&gt; 83A -0.26753<br/>74A -&gt; 86A -0.19163<br/>75A -&gt; 88A -0.10653<br/>71B -&gt; 76B 0.16805<br/><b>71B -&gt; 81B 0.66936</b><br/>72B -&gt; 75B 0.19575<br/>72B -&gt; 82B 0.43583<br/>73B -&gt; 87B 0.24384<br/>74B -&gt; 86B 0.22114</p>                                                                                                                                      |  <p>71B</p>  |  <p>81B</p>  |
| <p>Excited State 89: 3.072-?Sym<br/>5.1612 eV 240.22 nm<br/>f=0.0069 &lt;S**2&gt;=2.109</p> <p>72A -&gt; 83A 0.17318<br/>73A -&gt; 87A 0.18538<br/>74A -&gt; 89A 0.25753<br/>75A -&gt; 86A -0.18742<br/>75A -&gt; 87A -0.28876<br/>71B -&gt; 75B -0.12636<br/>71B -&gt; 79B 0.20357<br/>71B -&gt; 82B -0.17738<br/>72B -&gt; 76B 0.11320<br/><b>72B -&gt; 81B 0.60111</b><br/>73B -&gt; 86B -0.16295<br/>73B -&gt; 88B -0.28641<br/>74B -&gt; 87B 0.23375<br/>74B -&gt; 90B 0.22015</p> |  <p>72B</p> |  <p>81B</p> |

|                                                                                                                                                                                                                                                                                                                                                                                                                                                                                    |                                                                                                |                                                                                                  |
|------------------------------------------------------------------------------------------------------------------------------------------------------------------------------------------------------------------------------------------------------------------------------------------------------------------------------------------------------------------------------------------------------------------------------------------------------------------------------------|------------------------------------------------------------------------------------------------|--------------------------------------------------------------------------------------------------|
| <p>Excited State 90: 3.269-?Sym<br/> 5.1623 eV 240.17 nm<br/> f=0.0037 &lt;S**2&gt;=2.422</p> <p>71A -&gt; 84A -0.18428<br/> 72A -&gt; 83A 0.10007<br/> 73A -&gt; 87A 0.12533<br/> 74A -&gt; 89A -0.36718<br/> 75A -&gt; 86A -0.12673<br/> <b>75A -&gt; 87A 0.43950</b><br/> 71B -&gt; 79B 0.14285<br/> 71B -&gt; 82B -0.13033<br/> 72B -&gt; 81B 0.39392<br/> 73B -&gt; 86B -0.10929<br/> <b>73B -&gt; 88B 0.42412</b><br/> 74B -&gt; 87B 0.15606<br/> 74B -&gt; 90B -0.32362</p> | 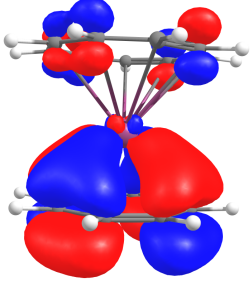 <p>75A</p>   |  <p>87A</p>   |
| <p>Excited State 91: 2.581-?Sym<br/> 5.2397 eV 236.63 nm<br/> f=0.0042 &lt;S**2&gt;=1.416</p> <p>71A -&gt; 83A 0.10781<br/> 72A -&gt; 81A -0.19861<br/> 71B -&gt; 81B -0.55304<br/> <b>72B -&gt; 82B 0.75165</b><br/> 72B -&gt; 83B -0.14074</p>                                                                                                                                                                                                                                   |  <p>72B</p>  |  <p>82B</p>  |
| <p>Excited State 92: 2.554-?Sym<br/> 5.2573 eV 235.83 nm<br/> f=0.0073 &lt;S**2&gt;=1.380</p> <p>71A -&gt; 81A 0.19729<br/> 72A -&gt; 83A 0.13430<br/> 73A -&gt; 87A -0.12713<br/> 71B -&gt; 75B 0.10071<br/> <b>71B -&gt; 82B 0.81990</b><br/> 72B -&gt; 76B -0.10215<br/> 72B -&gt; 81B 0.40081<br/> 72B -&gt; 84B 0.10540<br/> 73B -&gt; 86B 0.10404</p>                                                                                                                        |  <p>71B</p> |  <p>82B</p> |



## Optimized structure

### 3-disp

|    |             |             |             |
|----|-------------|-------------|-------------|
| Ce | 4.577791000 | 3.235332000 | 4.478832000 |
| C  | 1.912585000 | 4.517356000 | 4.107971000 |
| H  | 1.496519000 | 4.775668000 | 5.079991000 |
| C  | 2.717308000 | 5.427973000 | 3.407535000 |
| H  | 2.740962000 | 6.463965000 | 3.737212000 |
| C  | 3.605211000 | 5.113529000 | 2.350205000 |
| H  | 4.097291000 | 6.002171000 | 1.960703000 |
| C  | 4.113146000 | 3.951845000 | 1.698845000 |
| H  | 4.875098000 | 4.274114000 | 0.990636000 |
| C  | 1.871955000 | 3.235404000 | 3.563154000 |
| C  | 4.555302000 | 3.942013000 | 7.044089000 |
| H  | 3.740918000 | 4.358746000 | 7.631978000 |
| C  | 5.315568000 | 4.936055000 | 6.391385000 |
| H  | 4.937522000 | 5.937230000 | 6.584552000 |
| C  | 6.378318000 | 4.936268000 | 5.461183000 |
| H  | 6.623086000 | 5.937809000 | 5.115482000 |
| C  | 7.127827000 | 3.941664000 | 4.796894000 |
| H  | 7.817873000 | 4.358558000 | 4.067139000 |
| H  | 2.132183000 | 3.235374000 | 2.509816000 |
| C  | 1.912499000 | 1.953469000 | 4.108021000 |
| H  | 1.496415000 | 1.695225000 | 5.080051000 |
| C  | 2.717162000 | 1.042771000 | 3.407623000 |
| H  | 2.740746000 | 0.006790000 | 3.737343000 |
| C  | 3.605088000 | 1.357111000 | 2.350282000 |
| H  | 4.097111000 | 0.468421000 | 1.960816000 |
| C  | 4.113099000 | 2.518736000 | 1.698875000 |
| H  | 4.875030000 | 2.196388000 | 0.990679000 |
| C  | 4.555361000 | 2.528539000 | 7.044061000 |
| H  | 3.741011000 | 2.111715000 | 7.631931000 |
| C  | 5.315706000 | 1.534586000 | 6.391314000 |
| H  | 4.937741000 | 0.533372000 | 6.584440000 |
| C  | 6.378453000 | 1.534497000 | 5.461109000 |
| H  | 6.623302000 | 0.532989000 | 5.115367000 |
| C  | 7.127882000 | 2.529189000 | 4.796862000 |
| H  | 7.817963000 | 2.112383000 | 4.067089000 |

### 4-disp

|    |             |             |             |
|----|-------------|-------------|-------------|
| Ce | 4.507571000 | 3.235360000 | 4.616365000 |
| C  | 1.496798000 | 3.235352000 | 4.546377000 |
| H  | 0.792927000 | 3.235354000 | 5.376205000 |
| C  | 1.830006000 | 4.554977000 | 4.200999000 |
| H  | 1.300531000 | 5.252807000 | 4.846498000 |
| C  | 2.676817000 | 5.256802000 | 3.328305000 |
| H  | 2.594161000 | 6.326356000 | 3.511021000 |
| C  | 3.643153000 | 5.013074000 | 2.339094000 |
| H  | 4.072176000 | 5.953513000 | 1.999111000 |
| C  | 4.276734000 | 3.937579000 | 1.696636000 |
| H  | 5.042929000 | 4.308786000 | 1.019030000 |
| C  | 1.830001000 | 1.915727000 | 4.201001000 |
| H  | 1.300522000 | 1.217897000 | 4.846498000 |
| C  | 2.676827000 | 1.213898000 | 3.328322000 |

|   |             |             |             |
|---|-------------|-------------|-------------|
| H | 2.594178000 | 0.144346000 | 3.511048000 |
| C | 3.643165000 | 1.457623000 | 2.339113000 |
| H | 4.072201000 | 0.517184000 | 1.999147000 |
| C | 4.276739000 | 2.533116000 | 1.696645000 |
| H | 5.042942000 | 2.161907000 | 1.019049000 |
| C | 4.692375000 | 3.941635000 | 7.169573000 |
| H | 3.921039000 | 4.355764000 | 7.814281000 |
| C | 5.390067000 | 4.940011000 | 6.455660000 |
| H | 5.028208000 | 5.939996000 | 6.682330000 |
| C | 6.372947000 | 4.939991000 | 5.441921000 |
| H | 6.588336000 | 5.939979000 | 5.073254000 |
| C | 7.064966000 | 3.941646000 | 4.722509000 |
| H | 7.685411000 | 4.355737000 | 3.931525000 |
| C | 4.692362000 | 2.529056000 | 7.169561000 |
| H | 3.921023000 | 2.114928000 | 7.814265000 |
| C | 5.390046000 | 1.530687000 | 6.455630000 |
| H | 5.028172000 | 0.530701000 | 6.682277000 |
| C | 6.372945000 | 1.530710000 | 5.441912000 |
| H | 6.588340000 | 0.530724000 | 5.073241000 |
| C | 7.064966000 | 2.529059000 | 4.722508000 |
| H | 7.685408000 | 2.114970000 | 3.931521000 |

**1-disp, s=5/2**

|    |             |             |             |
|----|-------------|-------------|-------------|
| Sm | 4.438188000 | 3.235350000 | 4.562342000 |
| C  | 1.548011000 | 3.235350000 | 4.596266000 |
| H  | 0.843057000 | 3.235350000 | 5.424458000 |
| C  | 1.883544000 | 4.553679000 | 4.251770000 |
| H  | 1.360590000 | 5.251328000 | 4.901905000 |
| C  | 2.736738000 | 5.254179000 | 3.386372000 |
| H  | 2.662608000 | 6.322222000 | 3.578137000 |
| C  | 3.703665000 | 5.012580000 | 2.397250000 |
| H  | 4.138250000 | 5.952484000 | 2.064873000 |
| C  | 4.338509000 | 3.937860000 | 1.760429000 |
| H  | 5.113747000 | 4.307335000 | 1.093020000 |
| C  | 4.634957000 | 3.945213000 | 7.106222000 |
| H  | 3.868815000 | 4.355599000 | 7.759658000 |
| C  | 5.322257000 | 4.937927000 | 6.394265000 |
| H  | 4.972179000 | 5.940264000 | 6.627755000 |
| C  | 6.304443000 | 4.934782000 | 5.369759000 |
| H  | 6.514965000 | 5.935930000 | 5.001155000 |
| C  | 6.991631000 | 3.944895000 | 4.652431000 |
| H  | 7.616968000 | 4.357486000 | 3.864682000 |
| C  | 1.883545000 | 1.917021000 | 4.251770000 |
| H  | 1.360591000 | 1.219372000 | 4.901905000 |
| C  | 2.736738000 | 1.216521000 | 3.386373000 |
| H  | 2.662608000 | 0.148478000 | 3.578138000 |
| C  | 3.703665000 | 1.458120000 | 2.397250000 |
| H  | 4.138251000 | 0.518216000 | 2.064873000 |
| C  | 4.338509000 | 2.532841000 | 1.760429000 |
| H  | 5.113747000 | 2.163365000 | 1.093020000 |
| C  | 4.634957000 | 2.525487000 | 7.106221000 |
| H  | 3.868814000 | 2.115102000 | 7.759657000 |
| C  | 5.322257000 | 1.532772000 | 6.394264000 |
| H  | 4.972179000 | 0.530436000 | 6.627754000 |
| C  | 6.304442000 | 1.535917000 | 5.369759000 |
| H  | 6.514965000 | 0.534769000 | 5.001155000 |



|   |             |             |             |
|---|-------------|-------------|-------------|
| C | 6.991631000 | 2.525805000 | 4.652431000 |
| H | 7.616967000 | 2.113215000 | 3.864681000 |

**1-disp, s=3/2**

|    |             |             |             |
|----|-------------|-------------|-------------|
| Sm | 4.456149000 | 3.235350000 | 4.564075000 |
| C  | 1.578302000 | 3.235350000 | 4.622477000 |
| H  | 0.885541000 | 3.235350000 | 5.460799000 |
| C  | 1.911292000 | 4.553937000 | 4.278457000 |
| H  | 1.392658000 | 5.250364000 | 4.933187000 |
| C  | 2.759468000 | 5.255200000 | 3.409115000 |
| H  | 2.689963000 | 6.322903000 | 3.603522000 |
| C  | 3.724995000 | 5.010523000 | 2.421297000 |
| H  | 4.167574000 | 5.949120000 | 2.095914000 |
| C  | 4.353925000 | 3.936597000 | 1.773978000 |
| H  | 5.126751000 | 4.307865000 | 1.105014000 |
| C  | 4.602677000 | 3.940389000 | 7.080479000 |
| H  | 3.828343000 | 4.355044000 | 7.721144000 |
| C  | 5.297475000 | 4.936944000 | 6.363382000 |
| H  | 4.926826000 | 5.935798000 | 6.580633000 |
| C  | 6.280999000 | 4.938814000 | 5.352447000 |
| H  | 6.492017000 | 5.938380000 | 4.980705000 |
| C  | 6.974173000 | 3.940754000 | 4.636927000 |
| H  | 7.589361000 | 4.353955000 | 3.841335000 |
| C  | 1.911293000 | 1.916763000 | 4.278457000 |
| H  | 1.392659000 | 1.220336000 | 4.933188000 |
| C  | 2.759468000 | 1.215499000 | 3.409115000 |
| H  | 2.689963000 | 0.147797000 | 3.603522000 |
| C  | 3.724995000 | 1.460177000 | 2.421297000 |
| H  | 4.167574000 | 0.521580000 | 2.095914000 |
| C  | 4.353925000 | 2.534103000 | 1.773979000 |
| H  | 5.126751000 | 2.162835000 | 1.105014000 |
| C  | 4.602677000 | 2.530310000 | 7.080479000 |
| H  | 3.828344000 | 2.115656000 | 7.721145000 |
| C  | 5.297475000 | 1.533756000 | 6.363382000 |
| H  | 4.926826000 | 0.534902000 | 6.580633000 |
| C  | 6.280999000 | 1.531886000 | 5.352447000 |
| H  | 6.492016000 | 0.532320000 | 4.980705000 |
| C  | 6.974173000 | 2.529946000 | 4.636927000 |
| H  | 7.589361000 | 2.116745000 | 3.841336000 |

**1-disp, s=1/2**

|    |             |             |             |
|----|-------------|-------------|-------------|
| Sm | 4.461367000 | 3.235322000 | 4.568253000 |
| C  | 1.584855000 | 3.235605000 | 4.629785000 |
| H  | 0.892181000 | 3.235633000 | 5.468081000 |
| C  | 1.918844000 | 4.553757000 | 4.285304000 |
| H  | 1.402653000 | 5.250329000 | 4.941817000 |
| C  | 2.766551000 | 5.255183000 | 3.415926000 |
| H  | 2.698157000 | 6.322641000 | 3.611893000 |
| C  | 3.730761000 | 5.011279000 | 2.426311000 |
| H  | 4.172552000 | 5.949940000 | 2.100182000 |
| C  | 4.360435000 | 3.937216000 | 1.781496000 |
| H  | 5.135397000 | 4.307763000 | 1.114633000 |
| C  | 4.594706000 | 3.940873000 | 7.071830000 |
| H  | 3.816186000 | 4.354446000 | 7.708047000 |
| C  | 5.291498000 | 4.937562000 | 6.358711000 |
| H  | 4.919649000 | 5.936312000 | 6.574088000 |
| C  | 6.271377000 | 4.937725000 | 5.344191000 |
| H  | 6.476942000 | 5.936406000 | 4.967081000 |
| C  | 6.968750000 | 3.939784000 | 4.630516000 |

|   |             |             |             |
|---|-------------|-------------|-------------|
| H | 7.581613000 | 4.353588000 | 3.833520000 |
| C | 1.918729000 | 1.917483000 | 4.285309000 |
| H | 1.402572000 | 1.220870000 | 4.941792000 |
| C | 2.767023000 | 1.216209000 | 3.416363000 |
| H | 2.699391000 | 0.148832000 | 3.612980000 |
| C | 3.731170000 | 1.460060000 | 2.426606000 |
| H | 4.173368000 | 0.521401000 | 2.101047000 |
| C | 4.360451000 | 2.534001000 | 1.781301000 |
| H | 5.135345000 | 2.163521000 | 1.114336000 |
| C | 4.594702000 | 2.529341000 | 7.071571000 |
| H | 3.815921000 | 2.115742000 | 7.707491000 |
| C | 5.291672000 | 1.532417000 | 6.358886000 |
| H | 4.920403000 | 0.533621000 | 6.575017000 |
| C | 6.271873000 | 1.532267000 | 5.344588000 |
| H | 6.478450000 | 0.533483000 | 4.968285000 |
| C | 6.969235000 | 2.530247000 | 4.631053000 |
| H | 7.582208000 | 2.116393000 | 3.834142000 |

**1, s=5/2**

|    |             |             |             |
|----|-------------|-------------|-------------|
| Sm | 4.491774000 | 3.235350000 | 4.447602000 |
| C  | 1.917403000 | 4.513888000 | 4.111436000 |
| H  | 1.487309000 | 4.775311000 | 5.076825000 |
| C  | 2.738128000 | 5.422144000 | 3.424451000 |
| H  | 2.755905000 | 6.458661000 | 3.754010000 |
| C  | 3.645168000 | 5.109651000 | 2.385768000 |
| H  | 4.141414000 | 6.000259000 | 2.005501000 |
| C  | 4.166307000 | 3.950126000 | 1.736465000 |
| H  | 4.935030000 | 4.276202000 | 1.037391000 |
| C  | 1.866671000 | 3.235389000 | 3.560381000 |
| C  | 4.546258000 | 3.935424000 | 7.039686000 |
| H  | 3.760293000 | 4.357422000 | 7.662622000 |
| C  | 5.300736000 | 4.938903000 | 6.366778000 |
| H  | 4.943018000 | 5.940953000 | 6.593983000 |
| C  | 6.333367000 | 4.938629000 | 5.422714000 |
| H  | 6.591324000 | 5.940600000 | 5.086344000 |
| C  | 7.072833000 | 3.935047000 | 4.733978000 |
| H  | 7.761287000 | 4.357077000 | 4.004925000 |
| H  | 2.141027000 | 3.235362000 | 2.509725000 |
| C  | 1.917347000 | 1.956910000 | 4.111487000 |
| H  | 1.487242000 | 1.695544000 | 5.076887000 |
| C  | 2.738032000 | 1.048590000 | 3.424539000 |
| H  | 2.755762000 | 0.012085000 | 3.754139000 |
| C  | 3.645086000 | 1.361000000 | 2.385844000 |
| H  | 4.141293000 | 0.470355000 | 2.005613000 |
| C  | 4.166277000 | 2.520477000 | 1.736495000 |
| H  | 4.934984000 | 2.194338000 | 1.037434000 |
| C  | 4.546295000 | 2.535159000 | 7.039653000 |
| H  | 3.760352000 | 2.113091000 | 7.662569000 |
| C  | 5.300824000 | 1.531749000 | 6.366699000 |
| H  | 4.943156000 | 0.529671000 | 6.593856000 |
| C  | 6.333455000 | 1.532120000 | 5.422634000 |
| H  | 6.591462000 | 0.530178000 | 5.086216000 |
| C  | 7.072868000 | 2.535772000 | 4.733943000 |
| H  | 7.761343000 | 2.113812000 | 4.004870000 |

**1, s=3/2**

|    |             |             |             |
|----|-------------|-------------|-------------|
| Sm | 4.528968000 | 3.235341000 | 4.455653000 |
| C  | 1.954971000 | 4.515628000 | 4.154902000 |
| H  | 1.527121000 | 4.776723000 | 5.120865000 |

|   |             |             |             |
|---|-------------|-------------|-------------|
| C | 2.773766000 | 5.421408000 | 3.467097000 |
| H | 2.801607000 | 6.455794000 | 3.801697000 |
| C | 3.673013000 | 5.107856000 | 2.418961000 |
| H | 4.173358000 | 5.997574000 | 2.042465000 |
| C | 4.183827000 | 3.951463000 | 1.761931000 |
| H | 4.950422000 | 4.276383000 | 1.060237000 |
| C | 1.910339000 | 3.235388000 | 3.605765000 |
| C | 4.502954000 | 3.941342000 | 6.990042000 |
| H | 3.698844000 | 4.359944000 | 7.591356000 |
| C | 5.261368000 | 4.934484000 | 6.331531000 |
| H | 4.888183000 | 5.936542000 | 6.532615000 |
| C | 6.312492000 | 4.937129000 | 5.389987000 |
| H | 6.558621000 | 5.939766000 | 5.047641000 |
| C | 7.049227000 | 3.941372000 | 4.711996000 |
| H | 7.728362000 | 4.357979000 | 3.971261000 |
| H | 2.175447000 | 3.235365000 | 2.552848000 |
| C | 1.954911000 | 1.955163000 | 4.154944000 |
| H | 1.527048000 | 1.694120000 | 5.120915000 |
| C | 2.773665000 | 1.049323000 | 3.467170000 |
| H | 2.801457000 | 0.014947000 | 3.801804000 |
| C | 3.672928000 | 1.362799000 | 2.419024000 |
| H | 4.173231000 | 0.473046000 | 2.042556000 |
| C | 4.183793000 | 2.519147000 | 1.761955000 |
| H | 4.950372000 | 2.194168000 | 1.060270000 |
| C | 4.502994000 | 2.529249000 | 6.990017000 |
| H | 3.698906000 | 2.110580000 | 7.591314000 |
| C | 5.261464000 | 1.536172000 | 6.331470000 |
| H | 4.888334000 | 0.534087000 | 6.532521000 |
| C | 6.312586000 | 1.533619000 | 5.389925000 |
| H | 6.558770000 | 0.531007000 | 5.047543000 |
| C | 7.049264000 | 2.529442000 | 4.711969000 |
| H | 7.728421000 | 2.112900000 | 3.971217000 |

**1, s=1/2**

|    |             |             |             |
|----|-------------|-------------|-------------|
| Sm | 4.518720000 | 3.240110000 | 4.479438000 |
| C  | 1.949900000 | 4.510694000 | 4.143827000 |
| H  | 1.514939000 | 4.766421000 | 5.108308000 |
| C  | 2.768591000 | 5.424029000 | 3.463346000 |
| H  | 2.785041000 | 6.459450000 | 3.795508000 |
| C  | 3.679685000 | 5.111405000 | 2.427918000 |
| H  | 4.182779000 | 6.000309000 | 2.053210000 |
| C  | 4.201258000 | 3.951220000 | 1.782298000 |
| H  | 4.981485000 | 4.275212000 | 1.095313000 |
| C  | 1.909637000 | 3.233346000 | 3.589768000 |
| C  | 4.517610000 | 3.943884000 | 7.007732000 |
| H  | 3.721400000 | 4.364235000 | 7.618113000 |
| C  | 5.265774000 | 4.936224000 | 6.332328000 |
| H  | 4.896787000 | 5.938822000 | 6.537601000 |
| C  | 6.310556000 | 4.937241000 | 5.383357000 |
| H  | 6.552010000 | 5.939458000 | 5.036657000 |
| C  | 7.034511000 | 3.940928000 | 4.691745000 |
| H  | 7.702415000 | 4.358138000 | 3.941259000 |
| H  | 2.180260000 | 3.233704000 | 2.538447000 |
| C  | 1.948490000 | 1.952518000 | 4.141865000 |
| H  | 1.505730000 | 1.692698000 | 5.101613000 |
| C  | 2.769451000 | 1.043799000 | 3.462470000 |
| H  | 2.789597000 | 0.008367000 | 3.794447000 |
| C  | 3.683625000 | 1.359757000 | 2.428430000 |
| H  | 4.188289000 | 0.471615000 | 2.054077000 |

|   |             |             |             |
|---|-------------|-------------|-------------|
| C | 4.200338000 | 2.519495000 | 1.780416000 |
| H | 4.980616000 | 2.196633000 | 1.092916000 |
| C | 4.512755000 | 2.533445000 | 7.002300000 |
| H | 3.715370000 | 2.114643000 | 7.612282000 |
| C | 5.264122000 | 1.537038000 | 6.333560000 |
| H | 4.892089000 | 0.535743000 | 6.539398000 |
| C | 6.301938000 | 1.534858000 | 5.380045000 |
| H | 6.537745000 | 0.532388000 | 5.029690000 |
| C | 7.029990000 | 2.528893000 | 4.686762000 |
| H | 7.697526000 | 2.110530000 | 3.937023000 |

**2-disp, s=5/2**

|    |             |             |             |
|----|-------------|-------------|-------------|
| Sm | 4.438188000 | 3.235350000 | 4.562342000 |
| C  | 1.548011000 | 3.235350000 | 4.596266000 |
| H  | 0.843057000 | 3.235350000 | 5.424458000 |
| C  | 1.883544000 | 4.553679000 | 4.251770000 |
| H  | 1.360590000 | 5.251328000 | 4.901905000 |
| C  | 2.736738000 | 5.254179000 | 3.386372000 |
| H  | 2.662608000 | 6.322222000 | 3.578137000 |
| C  | 3.703665000 | 5.012580000 | 2.397250000 |
| H  | 4.138250000 | 5.952484000 | 2.064873000 |
| C  | 4.338509000 | 3.937860000 | 1.760429000 |
| H  | 5.113747000 | 4.307335000 | 1.093020000 |
| C  | 4.634957000 | 3.945213000 | 7.106222000 |
| H  | 3.868815000 | 4.355599000 | 7.759658000 |
| C  | 5.322257000 | 4.937927000 | 6.394265000 |
| H  | 4.972179000 | 5.940264000 | 6.627755000 |
| C  | 6.304443000 | 4.934782000 | 5.369759000 |
| H  | 6.514965000 | 5.935930000 | 5.001155000 |
| C  | 6.991631000 | 3.944895000 | 4.652431000 |
| H  | 7.616968000 | 4.357486000 | 3.864682000 |
| C  | 1.883545000 | 1.917021000 | 4.251770000 |
| H  | 1.360591000 | 1.219372000 | 4.901905000 |
| C  | 2.736738000 | 1.216521000 | 3.386373000 |
| H  | 2.662608000 | 0.148478000 | 3.578138000 |
| C  | 3.703665000 | 1.458120000 | 2.397250000 |
| H  | 4.138251000 | 0.518216000 | 2.064873000 |
| C  | 4.338509000 | 2.532841000 | 1.760429000 |
| H  | 5.113747000 | 2.163365000 | 1.093020000 |
| C  | 4.634957000 | 2.525487000 | 7.106221000 |
| H  | 3.868814000 | 2.115102000 | 7.759657000 |
| C  | 5.322257000 | 1.532772000 | 6.394264000 |
| H  | 4.972179000 | 0.530436000 | 6.627754000 |
| C  | 6.304442000 | 1.535917000 | 5.369759000 |
| H  | 6.514965000 | 0.534769000 | 5.001155000 |
| C  | 6.991631000 | 2.525805000 | 4.652431000 |
| H  | 7.616967000 | 2.113215000 | 3.864681000 |

**2-disp, s=3/2**

|    |             |             |             |
|----|-------------|-------------|-------------|
| Sm | 4.456149000 | 3.235350000 | 4.564075000 |
| C  | 1.578302000 | 3.235350000 | 4.622477000 |
| H  | 0.885541000 | 3.235350000 | 5.460799000 |
| C  | 1.911292000 | 4.553937000 | 4.278457000 |
| H  | 1.392658000 | 5.250364000 | 4.933187000 |
| C  | 2.759468000 | 5.255200000 | 3.409115000 |
| H  | 2.689963000 | 6.322903000 | 3.603522000 |
| C  | 3.724995000 | 5.010523000 | 2.421297000 |
| H  | 4.167574000 | 5.949120000 | 2.095914000 |
| C  | 4.353925000 | 3.936597000 | 1.773978000 |

|   |             |             |             |
|---|-------------|-------------|-------------|
| H | 5.126751000 | 4.307865000 | 1.105014000 |
| C | 4.602677000 | 3.940389000 | 7.080479000 |
| H | 3.828343000 | 4.355044000 | 7.721144000 |
| C | 5.297475000 | 4.936944000 | 6.363382000 |
| H | 4.926826000 | 5.935798000 | 6.580633000 |
| C | 6.280999000 | 4.938814000 | 5.352447000 |
| H | 6.492017000 | 5.938380000 | 4.980705000 |
| C | 6.974173000 | 3.940754000 | 4.636927000 |
| H | 7.589361000 | 4.353955000 | 3.841335000 |
| C | 1.911293000 | 1.916763000 | 4.278457000 |
| H | 1.392659000 | 1.220336000 | 4.933188000 |
| C | 2.759468000 | 1.215499000 | 3.409115000 |
| H | 2.689963000 | 0.147797000 | 3.603522000 |
| C | 3.724995000 | 1.460177000 | 2.421297000 |
| H | 4.167574000 | 0.521580000 | 2.095914000 |
| C | 4.353925000 | 2.534103000 | 1.773979000 |
| H | 5.126751000 | 2.162835000 | 1.105014000 |
| C | 4.602677000 | 2.530310000 | 7.080479000 |
| H | 3.828344000 | 2.115656000 | 7.721145000 |
| C | 5.297475000 | 1.533756000 | 6.363382000 |
| H | 4.926826000 | 0.534902000 | 6.580633000 |
| C | 6.280999000 | 1.531886000 | 5.352447000 |
| H | 6.492016000 | 0.532320000 | 4.980705000 |
| C | 6.974173000 | 2.529946000 | 4.636927000 |
| H | 7.589361000 | 2.116745000 | 3.841336000 |

**2-disp, s=1/2**

|    |             |             |             |
|----|-------------|-------------|-------------|
| Sm | 4.461367000 | 3.235322000 | 4.568253000 |
| C  | 1.584855000 | 3.235605000 | 4.629785000 |
| H  | 0.892181000 | 3.235633000 | 5.468081000 |
| C  | 1.918844000 | 4.553757000 | 4.285304000 |
| H  | 1.402653000 | 5.250329000 | 4.941817000 |
| C  | 2.766551000 | 5.255183000 | 3.415926000 |
| H  | 2.698157000 | 6.322641000 | 3.611893000 |
| C  | 3.730761000 | 5.011279000 | 2.426311000 |
| H  | 4.172552000 | 5.949940000 | 2.100182000 |
| C  | 4.360435000 | 3.937216000 | 1.781496000 |
| H  | 5.135397000 | 4.307763000 | 1.114633000 |
| C  | 4.594706000 | 3.940873000 | 7.071830000 |
| H  | 3.816186000 | 4.354446000 | 7.708047000 |
| C  | 5.291498000 | 4.937562000 | 6.358711000 |
| H  | 4.919649000 | 5.936312000 | 6.574088000 |
| C  | 6.271377000 | 4.937725000 | 5.344191000 |
| H  | 6.476942000 | 5.936406000 | 4.967081000 |
| C  | 6.968750000 | 3.939784000 | 4.630516000 |
| H  | 7.581613000 | 4.353588000 | 3.833520000 |
| C  | 1.918729000 | 1.917483000 | 4.285309000 |
| H  | 1.402572000 | 1.220870000 | 4.941792000 |
| C  | 2.767023000 | 1.216209000 | 3.416363000 |
| H  | 2.699391000 | 0.148832000 | 3.612980000 |
| C  | 3.731170000 | 1.460060000 | 2.426606000 |
| H  | 4.173368000 | 0.521401000 | 2.101047000 |
| C  | 4.360451000 | 2.534001000 | 1.781301000 |
| H  | 5.135345000 | 2.163521000 | 1.114336000 |
| C  | 4.594702000 | 2.529341000 | 7.071571000 |
| H  | 3.815921000 | 2.115742000 | 7.707491000 |
| C  | 5.291672000 | 1.532417000 | 6.358886000 |
| H  | 4.920403000 | 0.533621000 | 6.575017000 |
| C  | 6.271873000 | 1.532267000 | 5.344588000 |

|   |             |             |             |
|---|-------------|-------------|-------------|
| H | 6.478450000 | 0.533483000 | 4.968285000 |
| C | 6.969235000 | 2.530247000 | 4.631053000 |
| H | 7.582208000 | 2.116393000 | 3.834142000 |

**2, s=5/2**

|    |             |             |             |
|----|-------------|-------------|-------------|
| Sm | 4.438216000 | 3.235347000 | 4.556735000 |
| C  | 1.529510000 | 3.235352000 | 4.580234000 |
| H  | 0.819198000 | 3.235353000 | 5.404567000 |
| C  | 1.864000000 | 4.554651000 | 4.234544000 |
| H  | 1.334469000 | 5.253075000 | 4.879363000 |
| C  | 2.714815000 | 5.255480000 | 3.365722000 |
| H  | 2.632688000 | 6.324892000 | 3.549520000 |
| C  | 3.680388000 | 5.013573000 | 2.373878000 |
| H  | 4.106153000 | 5.954658000 | 2.031832000 |
| C  | 4.314501000 | 3.938390000 | 1.735285000 |
| H  | 5.080678000 | 4.308388000 | 1.056920000 |
| C  | 4.654686000 | 3.946727000 | 7.126921000 |
| H  | 3.895447000 | 4.357028000 | 7.789345000 |
| C  | 5.343162000 | 4.938578000 | 6.417265000 |
| H  | 5.001778000 | 5.942632000 | 6.658796000 |
| C  | 6.330852000 | 4.935754000 | 5.393720000 |
| H  | 6.553109000 | 5.938918000 | 5.036023000 |
| C  | 7.019546000 | 3.946525000 | 4.679418000 |
| H  | 7.658758000 | 4.358789000 | 3.901899000 |
| C  | 1.863995000 | 1.916052000 | 4.234544000 |
| H  | 1.334463000 | 1.217630000 | 4.879363000 |
| C  | 2.714808000 | 1.215221000 | 3.365721000 |
| H  | 2.632676000 | 0.145809000 | 3.549519000 |
| C  | 3.680382000 | 1.457125000 | 2.373877000 |
| H  | 4.106144000 | 0.516039000 | 2.031832000 |
| C  | 4.314498000 | 2.532306000 | 1.735285000 |
| H  | 5.080674000 | 2.162306000 | 1.056919000 |
| C  | 4.654689000 | 2.523969000 | 7.126921000 |
| H  | 3.895453000 | 2.113664000 | 7.789346000 |
| C  | 5.343169000 | 1.532120000 | 6.417265000 |
| H  | 5.001789000 | 0.528065000 | 6.658796000 |
| C  | 6.330859000 | 1.534949000 | 5.393720000 |
| H  | 6.553119000 | 0.531786000 | 5.036023000 |
| C  | 7.019549000 | 2.524180000 | 4.679417000 |
| H  | 7.658764000 | 2.111919000 | 3.901899000 |

**2, s=3/2**

|    |             |             |             |
|----|-------------|-------------|-------------|
| Sm | 4.461632000 | 3.235350000 | 4.568566000 |
| C  | 1.559274000 | 3.235350000 | 4.605772000 |
| H  | 0.858063000 | 3.235350000 | 5.437780000 |
| C  | 1.892361000 | 4.554794000 | 4.261499000 |
| H  | 1.365666000 | 5.252022000 | 4.909742000 |
| C  | 2.740467000 | 5.256523000 | 3.391034000 |
| H  | 2.663084000 | 6.325558000 | 3.578104000 |
| C  | 3.706169000 | 5.011768000 | 2.402162000 |
| H  | 4.141136000 | 5.951542000 | 2.068297000 |
| C  | 4.335190000 | 3.937041000 | 1.754301000 |
| H  | 5.101027000 | 4.308705000 | 1.076691000 |
| C  | 4.623061000 | 3.940816000 | 7.101745000 |
| H  | 3.855152000 | 4.356035000 | 7.750639000 |
| C  | 5.318333000 | 4.938036000 | 6.384292000 |
| H  | 4.954849000 | 5.938368000 | 6.609369000 |
| C  | 6.302789000 | 4.939914000 | 5.373032000 |
| H  | 6.522036000 | 5.940907000 | 5.008393000 |

|   |             |             |             |
|---|-------------|-------------|-------------|
| C | 6.99660000  | 3.941217000 | 4.657299000 |
| H | 7.621088000 | 4.355002000 | 3.868558000 |
| C | 1.892362000 | 1.915906000 | 4.261499000 |
| H | 1.365666000 | 1.218678000 | 4.909742000 |
| C | 2.740467000 | 1.214177000 | 3.391034000 |
| H | 2.663084000 | 0.145142000 | 3.578104000 |
| C | 3.706169000 | 1.458932000 | 2.402162000 |
| H | 4.141136000 | 0.519158000 | 2.068297000 |
| C | 4.335190000 | 2.533659000 | 1.754301000 |
| H | 5.101027000 | 2.161996000 | 1.076691000 |
| C | 4.623061000 | 2.529884000 | 7.101745000 |
| H | 3.855152000 | 2.114665000 | 7.750639000 |
| C | 5.318333000 | 1.532664000 | 6.384292000 |
| H | 4.954849000 | 0.532332000 | 6.609368000 |
| C | 6.302789000 | 1.530786000 | 5.373032000 |
| H | 6.522036000 | 0.529793000 | 5.008393000 |
| C | 6.996600000 | 2.529483000 | 4.657299000 |
| H | 7.621088000 | 2.115697000 | 3.868559000 |

**2, s=1/2**

|    |             |             |             |
|----|-------------|-------------|-------------|
| Sm | 4.467377000 | 3.235362000 | 4.574846000 |
| C  | 1.564564000 | 3.235672000 | 4.611752000 |
| H  | 0.862617000 | 3.235797000 | 5.443062000 |
| C  | 1.900444000 | 4.554516000 | 4.268644000 |
| H  | 1.376088000 | 5.252169000 | 4.918318000 |
| C  | 2.748407000 | 5.256247000 | 3.397497000 |
| H  | 2.672556000 | 6.324982000 | 3.586885000 |
| C  | 3.712872000 | 5.012799000 | 2.407866000 |
| H  | 4.146957000 | 5.952574000 | 2.072996000 |
| C  | 4.342239000 | 3.937154000 | 1.761366000 |
| H  | 5.109543000 | 4.308406000 | 1.085196000 |
| C  | 4.615959000 | 3.940068000 | 7.094756000 |
| H  | 3.843949000 | 4.354400000 | 7.739361000 |
| C  | 5.309673000 | 4.938852000 | 6.376739000 |
| H  | 4.945682000 | 5.938964000 | 6.601005000 |
| C  | 6.295785000 | 4.938665000 | 5.367300000 |
| H  | 6.508096000 | 5.938850000 | 4.996002000 |
| C  | 6.988525000 | 3.941249000 | 4.649254000 |
| H  | 7.610150000 | 4.355438000 | 3.858637000 |
| C  | 1.900525000 | 1.917005000 | 4.269068000 |
| H  | 1.376440000 | 1.219325000 | 4.918922000 |
| C  | 2.749024000 | 1.215220000 | 3.398130000 |
| H  | 2.673868000 | 0.146584000 | 3.588279000 |
| C  | 3.713032000 | 1.458534000 | 2.408226000 |
| H  | 4.147560000 | 0.518769000 | 2.073909000 |
| C  | 4.342589000 | 2.534144000 | 1.761667000 |
| H  | 5.109922000 | 2.162850000 | 1.085578000 |
| C  | 4.616943000 | 2.529631000 | 7.095606000 |
| H  | 3.844941000 | 2.115231000 | 7.740235000 |
| C  | 5.309809000 | 1.531035000 | 6.377018000 |
| H  | 4.946753000 | 0.530779000 | 6.602150000 |
| C  | 6.296004000 | 1.531305000 | 5.367156000 |
| H  | 6.509157000 | 0.531084000 | 4.996480000 |
| C  | 6.988813000 | 2.528865000 | 4.649738000 |
| H  | 7.610119000 | 2.114724000 | 3.858786000 |

## 9. References

- 1 M. Tricoire, L. Münzfeld, J. Moutet, N. Mahieu, L. La Droitte, E. Moreno-Pineda, F. Gendron, J. D. Hilgar, J. D. Rinehart, M. Ruben, B. Le Guennic, O. Cador, P. W. Roesky and G. Nocton, *Chem. – Eur. J.*, 2021, **27**, 13558–13567.
- 2 K. Mashima, Y. Nakayama, A. Nakamura, N. Kanehisa, Y. Kai and H. Takaya, *J. Organomet. Chem.*, 1994, **473**, 85–91.
- 3 K. Mashima and H. Takaya, *Tetrahedron Lett.*, 1989, **30**, 3697–3700.
- 4 M. Xémard, S. Zimmer, M. Cordier, V. Goudy, L. Ricard, C. Clavaguéra and G. Nocton, *J. Am. Chem. Soc.*, 2018, **140**, 14433–14439.
- 5 A. D. Becke, *J. Chem. Phys.*, 1993, **98**, 5648–5652.
- 6 M. Dolg, H. Stoll and H. Preuss, *Theor. Chim. Acta*, 1993, **85**, 441–450.
- 7 M. Dolg, H. Stoll, A. Savin and H. Preuss, *Theor. Chim. Acta*, 1989, **75**, 173–194.
- 8 R. Ditchfield, W. J. Hehre and J. A. Pople, *J. Chem. Phys.*, 1971, **54**, 724–728.
- 9 W. J. Hehre, R. Ditchfield and J. A. Pople, *J. Chem. Phys.*, 1972, **56**, 2257–2261.
- 10 K. O. Hodgson, F. Mares, D. F. Starks and A. Streitwieser, *J. Am. Chem. Soc.*, 1973, **95**, 8650–8658.
- 11 Citation | Gaussian.com, <https://gaussian.com/citation/>, (accessed July 9, 2024).
- 12 K. Wolinski, J. F. Hinton and P. Pulay, *J. Am. Chem. Soc.*, 1990, **112**, 8251–8260.
- 13 P. von R. Schleyer, C. Maerker, A. Dransfeld, H. Jiao and N. J. R. van Eikema Hommes, *J. Am. Chem. Soc.*, 1996, **118**, 6317–6318.
- 14 A. Stanger, *J. Org. Chem.*, 2006, **71**, 883–893.
- 15 K. K. Zborowski, I. Alkorta, J. Elguero and L. M. Proniewicz, *Struct. Chem.*, 2012, **23**, 595–600.
